# Supplementary material for: Global Proteome Profiling of the Temporal Cortex of Female Rats Exposed to Chronic Stress and the Western Diet
Source: MDPI journal article supplement (doi:10.3390/nu14091934), 2022-05-05
Supplement: s1 [file s1]

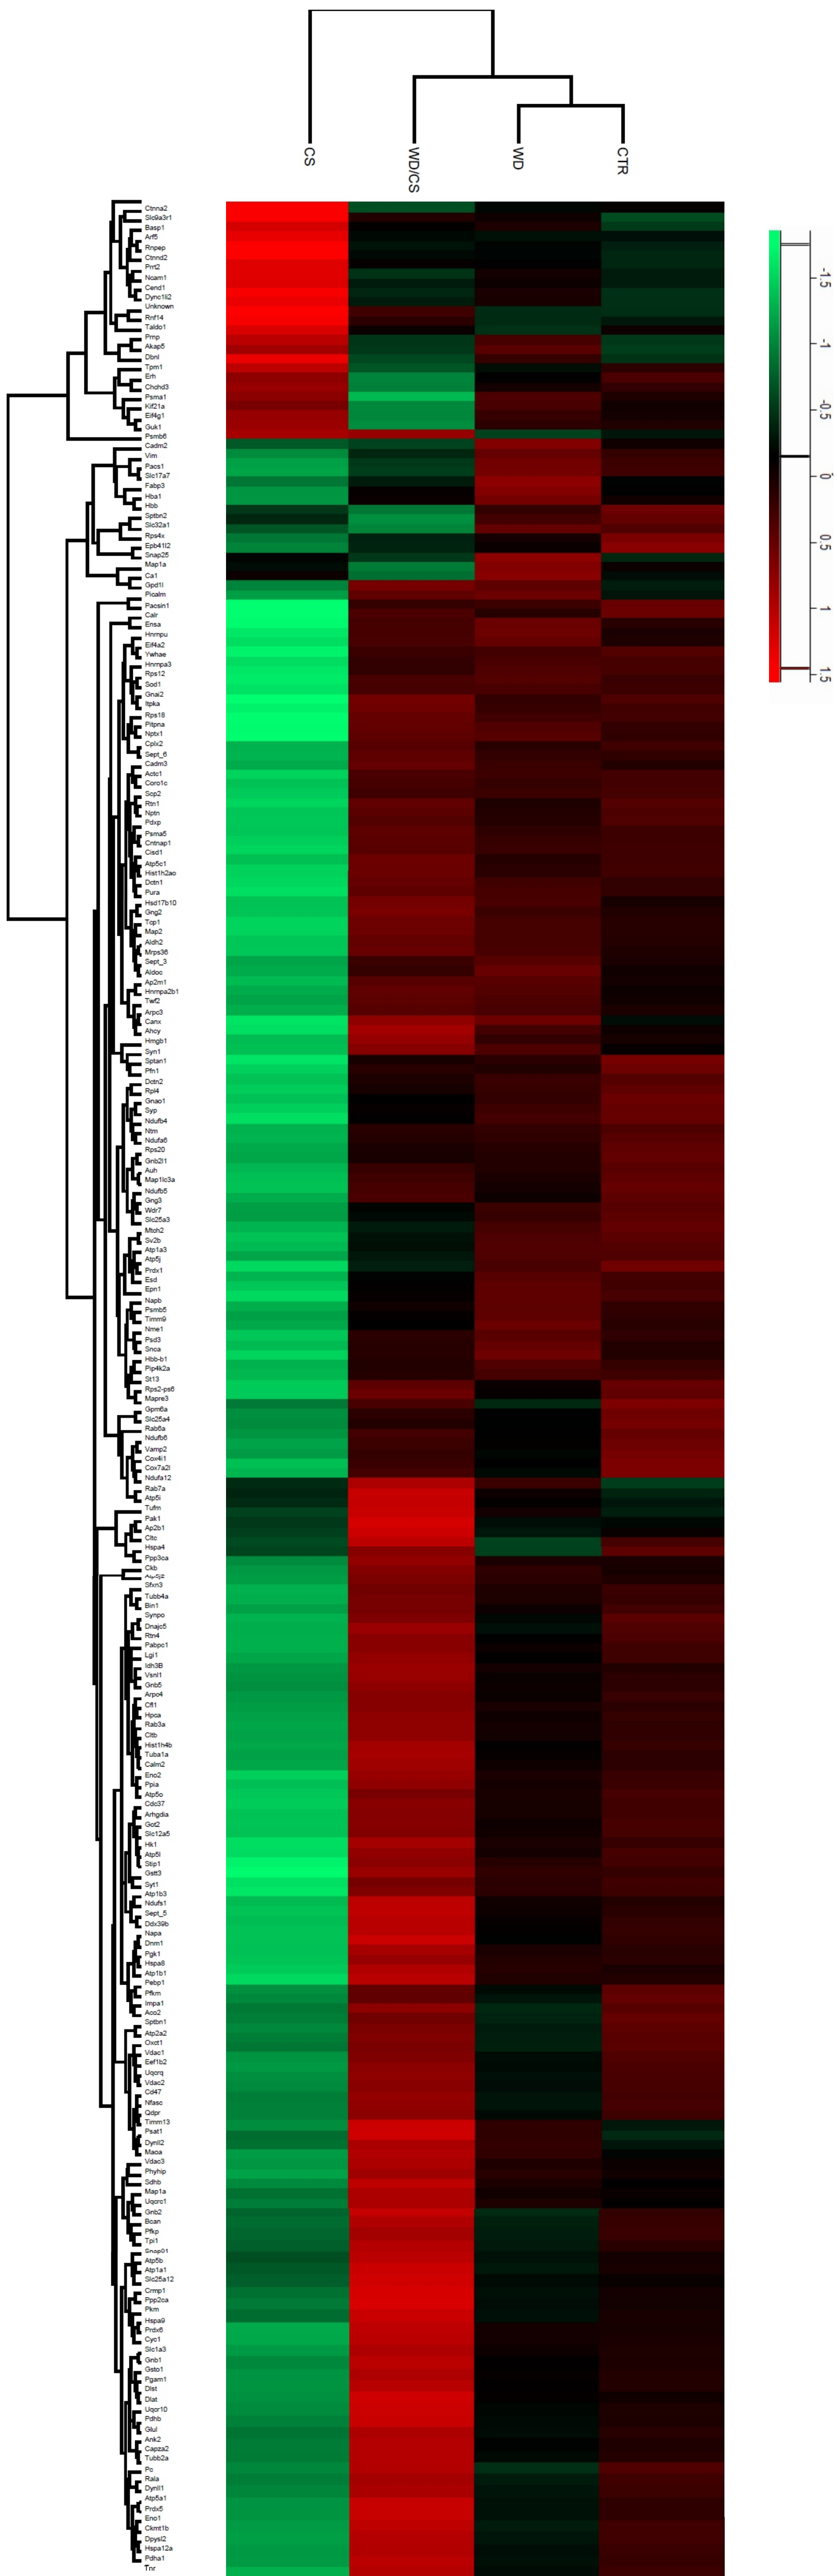

Figure S2. A heatmap of the cerebrocortical proteome analyzed by the two-way ANOVA, in which green indicates low protein abundance and red indicates high protein abundance. Each column represents an average of each experimental group: CTR (n=12); control rats fed with standard diet, WD (n = 12); rats fed with western diet, CS (n=6) rats fed with standard diet and subjected to chronic stress; CS/WD (n=6) rats fed with western diet and subjected to chronic stress. The number in the color scale indicates z-score.
