# Supplementary material for: Global Proteome Profiling of the Temporal Cortex of Female Rats Exposed to Chronic Stress and the Western Diet
Source: MDPI journal article supplement (doi:10.3390/nu14091934), 2022-05-05
Supplement: s1 [file s1]

Table S2. Table summarized fold changes and p-values from post hoc analysis of identified proteins.

|           | Gene name | ANOVA p-value | FC (CTR vs. WD)<br>p-value |        | FC (CTR vs. CS)<br>p-value |         | FC (CTR vs. WD/CS)<br>p-value |        | FC (CS vs. WD/CS)<br>p-value |         |
|-----------|-----------|---------------|----------------------------|--------|----------------------------|---------|-------------------------------|--------|------------------------------|---------|
| F1LQ63    | Tnr       | 0.000375      | 0.9181                     | ns     | 0.7561                     | ns      | 1.1508                        | ns     | 1.5219                       | 0.0209  |
| Q1WIM2    | Cadm2     | 0.002757      | 0.9386                     | ns     | 1.3187                     | ns      | 1.2898                        | ns     | 0.9781                       | ns      |
| P28073    | Psemb6    | 0.011788      | 1.0286                     | ns     | 1.3603                     | ns      | 0.6422                        | 0.0025 | 0.4721                       | <0.0001 |
| Q91XN7    | Tpm1      | 0.000839      | 1.2273                     | ns     | 1.7702                     | 0.0002  | 0.9562                        | ns     | 0.5402                       | 0.003   |
| Q9R1Z0    | Vdac3     | 0.021143      | 0.8311                     | ns     | 0.6126                     | ns      | 1.2229                        | ns     | 1.9962                       | ns      |
| P97829    | Cd47      | 0.015376      | 0.7813                     | ns     | 0.6526                     | 0.0071  | 1.0735                        | ns     | 1.6450                       | 0.0046  |
| P52873    | Pc        | 0.007681      | 0.9440                     | ns     | 0.8195                     | ns      | 1.1982                        | ns     | 1.4621                       | 0.0417  |
| Q66WT9    | Picalm    | 0.008600      | 1.3751                     | 0.0122 | 1.0521                     | ns      | 0.8076                        | ns     | 0.7675                       | ns      |
| A0A0G2J9  | Hbb-b1    | 0.008217      | 1.4053                     | 0.0066 | 0.3482                     | <0.0001 | 0.8258                        | ns     | 2.3718                       | <0.0001 |
| Q6AYH5    | Dctn2     | 0.001044      | 1.0884                     | ns     | 0.7926                     | ns      | 1.1618                        | ns     | 1.4658                       | 0.04    |
| F7FKI5    | Pdha1     | 0.001053      | 0.8935                     | ns     | 0.7157                     | 0.0488  | 1.2334                        | ns     | 1.7234                       | 0.0016  |
| A0A0G2JY3 | Ctna1     | 0.004372      | 1.1900                     | ns     | 1.9984                     | <0.0001 | 1.0523                        | ns     | 0.52659                      | 0.0002  |
| Q6IMY8    | Hnrnpu    | 0.000006      | 0.9222                     | ns     | 0.6466                     | 0.0057  | 0.9646                        | ns     | 1.4918                       | 0.298   |
| Q63363    | Sptan1    | 0.000030      | 1.0477                     | ns     | 0.8172                     | ns      | 1.1376                        | ns     | 1.3921                       | 0.089   |
| F1LRK0    | Snap91    | 0.013624      | 1.0222                     | ns     | 0.8979                     | ns      | 1.1463                        | ns     | 1.2767                       | ns      |
| A0A0G2K18 | Basp1     | 0.011191      | 1.4969                     | 0.0009 | 3.4992                     | <0.0001 | 1.3314                        | ns     | 0.3805                       | 0.0001  |
| B0BN52    | Mtch2     | 0.009762      | 0.8472                     | ns     | 0.5642                     | 0.0001  | 0.9632                        | ns     | 1.7072                       | 0.002   |
| G3V7U2    | Map1a     | 0.011724      | 1.0667                     | ns     | 0.9223                     | ns      | 1.1870                        | ns     | 1.2870                       | ns      |
| Q5FVG4    | Slc25a22  | 0.004211      | 0.7990                     | ns     | 0.6248                     | 0.0025  | 0.7392                        | ns     | 1.1831                       | ns      |
| D3ZZK1    | Rps20     | 0.000185      | 0.9373                     | ns     | 0.5364                     | <0.0001 | 0.8262                        | ns     | 1.5403                       | 0.0168  |
| D3ZCR3    | Hmgb1     | 0.013407      | 1.1470                     | ns     | 0.5418                     | <0.0001 | 1.1976                        | ns     | 2.2102                       | <0.0001 |
| F1M9N9    | Ank2      | 0.002239      | 0.9603                     | ns     | 0.8415                     | ns      | 1.2077                        | ns     | 1.4352                       | ns      |
| Q1WIM3    | Cadm3     | 0.000019      | 1.0413                     | ns     | 0.7256                     | ns      | 1.0469                        | ns     | 1.4428                       | ns      |
| B2RYX1    | Uqcr10    | 0.003129      | 0.9506                     | ns     | 0.7521                     | ns      | 1.2650                        | ns     | 1.6819                       | 0.0028  |
| Q6XD99    | Sptbn1    | 0.000027      | 0.9996                     | ns     | 0.8321                     | ns      | 1.1181                        | ns     | 1.3438                       | ns      |

|        |          |          |        |         |        |         |        |         |        |         |
|--------|----------|----------|--------|---------|--------|---------|--------|---------|--------|---------|
| P09527 | Rab7a    | 0.007276 | 0.8596 | ns      | 0.7181 | ns      | 0.9233 | ns      | 1.2857 | ns      |
| E9PSV5 | Psat1    | 0.014209 | 0.9160 | ns      | 0.7998 | ns      | 1.0733 | ns      | 1.3419 | ns      |
| P49432 | Pdhh     | 0.000845 | 0.9866 | ns      | 0.8346 | ns      | 1.2361 | ns      | 1.4810 | 0.033   |
| G3V846 | Slc1a3   | 0.004732 | 0.9476 | ns      | 0.8353 | ns      | 1.2701 | ns      | 1.5205 | 0.0213  |
| Q9WVB1 | Rab6a    | 0.000659 | 0.9116 | ns      | 0.7355 | ns      | 1.0117 | ns      | 1.3754 | ns      |
| D3ZM33 | Rps18    | 0.000482 | 1.0238 | ns      | 0.5717 | 0.0002  | 1.0175 | ns      | 1.7798 | 0.0008  |
| X1WI37 | Rps4x    | 0.008368 | 0.9124 | ns      | 0.6841 | 0.0201  | 0.5115 | <0.0001 | 0.7478 | ?       |
| B5DFG5 | Sept_6   | 0.000022 | 1.0480 | ns      | 0.6138 | 0.0016  | 1.0775 | ns      | 1.7555 | 0.011   |
| O55215 | Rps2-ps6 | 0.000542 | 1.1484 | ns      | 0.6433 | 0.0051  | 1.0080 | ns      | 1.5670 | 0.0122  |
| O88339 | Epn1     | 0.009499 | 0.9977 | ns      | 0.5485 | <0.0001 | 0.7788 | ns      | 1.4199 | 0.0663  |
| Q63692 | Cdc37    | 0.003665 | 0.9482 | ns      | 0.6922 | 0.0256  | 1.2195 | ns      | 1.7616 | 0.001   |
| P84092 | Ap2m1    | 0.002161 | 1.0490 | ns      | 0.7628 | ns      | 1.0897 | ns      | 1.4287 | ns      |
| B0BMW2 | Hsd17b10 | 0.001258 | 0.9747 | ns      | 0.7113 | 0.0435  | 1.0536 | ns      | 1.4812 | 0.0336  |
| B0BMY7 | Twf2     | 0.008816 | 1.1515 | ns      | 0.7349 | ns      | 1.0611 | ns      | 1.4439 | ns      |
| B0BNE5 | Esd      | 0.003518 | 0.9969 | ns      | 0.5992 | 0.0008  | 0.8314 | ns      | 1.3875 | ns      |
| B0BNN3 | Ca1      | 0.018704 | 1.8287 | <0.0001 | 1.1216 | ns      | 0.9379 | ns      | 0.8363 | ns      |
| B0K020 | Cisd1    | 0.002928 | 0.8300 | ns      | 0.2933 | ns      | 1.0105 | ns      | 3.4455 | <0.0001 |
| B1H216 | Hba1     | 0.006702 | 1.4158 | 0.0052  | 0.7543 | ns      | 0.9444 | ns      | 1.2521 | ns      |
| B1VKB4 | Synpo    | 0.021201 | 1.0174 | ns      | 0.7752 | ns      | 1.1318 | ns      | 1.4600 | ns      |
| B2GV06 | Oxct1    | 0.013290 | 0.8631 | ns      | 0.7504 | ns      | 0.9938 | ns      | 1.3243 | ns      |
| B2GV33 | Maoa     | 0.014498 | 0.8225 | ns      | 0.6471 | 0.0058  | 1.1813 | ns      | 1.8256 | 0.0004  |
| B2GV73 | Arcp3    | 0.004683 | 1.1519 | ns      | 0.6413 | 0.0047  | 1.1532 | ns      | 1.7981 | 0.0006  |
| B2GV79 | Pdpx     | 0.003528 | 0.9855 | ns      | 0.6864 | 0.0215  | 0.9900 | ns      | 1.4423 | ns      |
| B2RYQ5 | Erh      | 0.020835 | 0.9166 | ns      | 1.2489 | ns      | 0.8215 | ns      | 0.6578 | ns      |
| B2RYT5 | Cox7a2l  | 0.018672 | 0.8777 | ns      | 0.7255 | ns      | 0.9575 | ns      | 1.3198 | ns      |
| B2RZ72 | Arcp4    | 0.004113 | 0.9043 | ns      | 0.6811 | 0.0183  | 1.1492 | ns      | 1.6874 | 0.0026  |
| B4F7C2 | Tubb4a   | 0.021783 | 1.0019 | ns      | 0.8360 | ns      | 1.1408 | ns      | 1.3646 | ns      |
| B5DEN5 | Eef1b2   | 0.009698 | 0.8451 | ns      | 0.7548 | ns      | 1.0172 | ns      | 1.3476 | ns      |
| B6DYQ5 | Gsto1    | 0.001084 | 0.9876 | ns      | 0.6817 | 0.0187  | 1.3709 | 0.0482  | 2.0110 | <0.0001 |
| B7X6I3 | Cend1    | 0.015422 | 1.1487 | ns      | 2.4235 | <0.0001 | 1.0062 | ns      | 0.4152 | <0.0001 |
| C7C5T2 | Pfcp     | 0.003104 | 1.0273 | ns      | 0.8748 | ns      | 1.2010 | ns      | 1.3728 | ns      |

|        |           |          |        |        |        |         |        |         |        |         |
|--------|-----------|----------|--------|--------|--------|---------|--------|---------|--------|---------|
| D3Z8I7 | Gstt3     | 0.001601 | 0.8690 | ns     | 0.4893 | <0.0001 | 1.1848 | ns      | 2.4216 | <0.0001 |
| D3ZAF6 | Atp5j2    | 0.001921 | 0.8122 | ns     | 0.8024 | ns      | 1.2019 | ns      | 1.4979 | 0.027   |
| D3ZAP9 | Gpd1l     | 0.009459 | 1.1775 | ns     | 0.9671 | ns      | 0.8274 | ns      | 0.8556 | ns      |
| D3ZC55 | Hspa12a   | 0.001738 | 0.9422 | ns     | 0.8350 | ns      | 1.1111 | ns      | 1.3307 | ns      |
| D3ZSN6 | Kif21a    | 0.000606 | 1.1391 | ns     | 1.3473 | ns      | 0.5525 | <0.0001 | 0.4101 | <0.0001 |
| D3ZDH8 | Sept_5    | 0.000004 | 0.9936 | ns     | 0.6539 | 0.0075  | 1.1512 | ns      | 1.7605 | 0.001   |
| D3ZDT1 | Epb41l2   | 0.002791 | 1.0328 | 0.0351 | 0.7734 | ns      | 0.7182 | ns      | 0.9285 | ns      |
| D3ZFB6 | Prnt2     | 0.013560 | 1.1555 | ns     | 2.6381 | <0.0001 | 1.1707 | ns      | 0.4438 | <0.0001 |
| D3ZFQ8 | Cyc1      | 0.001063 | 0.9540 | ns     | 0.8059 | ns      | 1.3521 | ns      | 1.6778 | 0.0055  |
| D4A404 | Psd3      | 0.011354 | 1.1216 | ns     | 0.5643 | 0.0001  | 0.9204 | ns      | 1.6310 | ns      |
| D4AD15 | Eif4g1    | 0.021211 | 1.1270 | ns     | 1.2481 | ns      | 0.7258 | ns      | 0.5815 | ns      |
| D3ZUX5 | Chchd3    | 0.013245 | 0.8382 | ns     | 1.1770 | ns      | 0.6042 | 0.0004  | 0.5134 | <0.0001 |
| D3ZZ21 | Ndufb6    | 0.006064 | 0.6994 | 0.0039 | 0.5843 | 0.0004  | 0.8910 | ns      | 1.5248 | 0.0202  |
| M0RAX4 | Gnb5      | 0.004080 | 0.9448 | ns     | 0.7620 | ns      | 1.0866 | ns      | 1.4260 | 0.0621  |
| D4A3V2 | Ndufa6    | 0.000874 | 0.9306 | ns     | 0.5647 | 0.0001  | 0.8406 | ns      | 1.4886 | 0.03    |
| D4A565 | Ndufb5    | 0.014049 | 0.8820 | ns     | 0.5956 | 0.0007  | 0.8654 | ns      | 1.4530 | 0.046   |
| D4A6H8 | Ctnna2    | 0.001443 | 0.9708 | ns     | 1.6786 | 0.0007  | 0.8345 | ns      | 0.4972 | <0.0001 |
| D4A8U7 | Dctn1     | 0.001303 | 0.9932 | ns     | 0.6883 | 0.0228  | 1.0364 | ns      | 1.5057 | 0.0253  |
| F1LMH0 | Sept_3    | 0.000981 | 1.0457 | ns     | 0.6934 | 0.0265  | 1.1094 | ns      | 1.6000 | 0.0081  |
| F1LN88 | Aldh2     | 0.002327 | 1.0545 | ns     | 0.6360 | 0.0039  | 1.1944 | ns      | 1.8779 | 0.0002  |
| F1LNF1 | Hnrnpa2b1 | 0.019433 | 1.0574 | ns     | 0.8411 | ns      | 1.0306 | ns      | 1.2254 | ns      |
| F1LNK0 | Map2      | 0.002452 | 1.0305 | ns     | 0.8732 | ns      | 1.0600 | ns      | 1.2140 | ns      |
| F1LNY3 | Ncam1     | 0.008813 | 1.1328 | ns     | 1.9508 | <0.0001 | 0.9379 | ns      | 0.4808 | <0.0001 |
| F1LPG3 | Pacs1     | 0.020241 | 1.0654 | ns     | 0.7806 | ns      | 0.8897 | ns      | 1.1398 | ns      |
| F1LPG5 | Ndufb4    | 0.001536 | 0.8879 | ns     | 0.4128 | <0.0001 | 0.8083 | ns      | 1.9582 | <0.0001 |
| F1LPP6 | Akap5     | 0.009399 | 1.3074 | 0.0449 | 1.6623 | 0.0009  | 1.0065 | ns      | 0.6055 | 0.0042  |
| F1LPS8 | Pura      | 0.004160 | 0.9458 | ns     | 0.5734 | 0.0002  | 1.1059 | ns      | 1.9288 | <0.0001 |
| F1LQ55 | Scp2      | 0.016330 | 1.0585 | ns     | 0.5973 | 0.0008  | 1.1751 | ns      | 1.9674 | <0.0001 |
| F1LQN3 | Rtn4      | 0.009520 | 0.9131 | ns     | 0.4511 | <0.0001 | 1.2485 | ns      | 2.7676 | ns      |
| F1LU71 | Auh       | 0.010860 | 0.9532 | ns     | 0.7302 | ns      | 0.9428 | ns      | 1.2912 | ns      |
| F1LX07 | Slc25a12  | 0.018170 | 0.8932 | ns     | 0.8085 | ns      | 1.1550 | ns      | 1.4286 | ns      |

|        |           |          |        |         |        |         |        |         |        |         |
|--------|-----------|----------|--------|---------|--------|---------|--------|---------|--------|---------|
| F1LXA0 | Ndufa12   | 0.008528 | 0.8653 | ns      | 0.6908 | 0.0245  | 0.9338 | ns      | 1.3518 | ns      |
| F1M779 | Cltc      | 0.020911 | 1.0310 | ns      | 0.9780 | ns      | 1.2814 | ns      | 1.3102 | ns      |
| F1M787 | Ctnnd2    | 0.002228 | 1.0665 | ns      | 1.7555 | 0.0002  | 1.0554 | ns      | 0.6012 | 0.0036  |
| F1M953 | Hspa9     | 0.004235 | 0.9789 | ns      | 0.8882 | ns      | 1.2608 | ns      | 1.4195 | ns      |
| F1M978 | Impa1     | 0.001057 | 0.9875 | ns      | 0.7036 | 0.0354  | 1.1697 | ns      | 1.6624 | 0.0036  |
| F1MA36 | Sptbn2    | 0.013559 | 1.0786 | ns      | 0.8810 | ns      | 0.9951 | ns      | 1.1295 | ns      |
| F8WFM2 | Napb      | 0.000075 | 0.9508 | ns      | 0.6577 | 0.0085  | 0.8331 | ns      | 1.2668 | ns      |
| G3V624 | Coro1c    | 0.011408 | 1.0095 | ns      | 0.4519 | <0.0001 | 1.1741 | ns      | 2.5979 | <0.0001 |
| G3V6D3 | Atp5b     | 0.002654 | 0.8813 | ns      | 0.8140 | ns      | 1.2193 | ns      | 1.4979 | 0.0277  |
| G3V6P2 | Dlst      | 0.004135 | 0.9540 | ns      | 0.7459 | ns      | 1.3251 | ns      | 1.7765 | 0.0008  |
| G3V741 | Slc25a3   | 0.002374 | 0.9110 | ns      | 0.7141 | 0.0468  | 0.9643 | ns      | 1.3504 | ns      |
| G3V7Q6 | Psmb5     | 0.006266 | 1.0267 | ns      | 0.7271 | ns      | 0.9147 | ns      | 1.2580 | ns      |
| G3V8C3 | Vim       | 0.015690 | 1.6402 | <0.0001 | 0.6388 | 0.0043  | 0.7018 | 0.0215  | 1.0987 | ns      |
| G3V8G4 | Bcan      | 0.004883 | 1.0331 | ns      | 0.7721 | ns      | 1.2243 | ns      | 1.5856 | 0.0396  |
| G3V8K2 | Gng3      | 0.008141 | 0.9180 | ns      | 0.6455 | 0.0055  | 0.9468 | ns      | 1.4668 | ns      |
| Q5BJ93 | Eno1      | 0.000749 | 0.9235 | ns      | 0.7813 | ns      | 1.2149 | ns      | 1.5548 | 0.0141  |
| M0R776 | Mrps36    | 0.000903 | 1.1193 | ns      | 0.4057 | <0.0001 | 1.2926 | ns      | 3.1864 | <0.0001 |
| O08839 | Bin1      | 0.021419 | 1.0279 | ns      | 0.8102 | ns      | 1.1393 | ns      | 1.4062 | ns      |
| O35244 | Prdx6     | 0.001470 | 0.9548 | ns      | 0.8411 | ns      | 1.2905 | ns      | 1.5343 | 0.018   |
| O35458 | Slc32a1   | 0.015008 | 0.8555 | 0.0047  | 0.6410 | ns      | 0.5413 | <0.0001 | 0.8445 | ns      |
| O35814 | Stip1     | 0.001133 | 0.9178 | ns      | 0.6655 | 0.0111  | 1.1010 | ns      | 1.6545 | 0.004   |
| O88600 | Hspa4     | 0.010036 | 1.0653 | ns      | 0.9550 | ns      | 1.3354 | ns      | 1.3984 | ns      |
| P00507 | Got2      | 0.001423 | 0.9667 | ns      | 0.8011 | ns      | 1.0817 | ns      | 1.3503 | ns      |
| P02091 | Hbb       | 0.005301 | 1.4770 | 0.0014  | 0.6325 | 0.0034  | 1.0129 | ns      | 1.6013 | 0.0079  |
| P02262 | Hist1h2ac | 0.002153 | 0.9835 | ns      | 0.5545 | <0.0001 | 1.0636 | ns      | 1.9181 | 0.0001  |
| Q45QN0 | Gnai2     | 0.000309 | 1.0113 | ns      | 0.7146 | 0.0475  | 0.9785 | ns      | 1.3692 | ns      |
| P05708 | Hk1       | 0.000708 | 0.9696 | ns      | 0.8166 | ns      | 1.0569 | ns      | 1.2942 | ns      |
| P06685 | Atp1a1    | 0.007638 | 0.8906 | ns      | 0.8044 | ns      | 1.1789 | ns      | 1.4656 | 0.0401  |
| P06687 | Atp1a3    | 0.019508 | 0.9722 | ns      | 0.8310 | ns      | 0.9266 | ns      | 1.1151 | ns      |
| P07323 | Eno2      | 0.008111 | 0.9651 | ns      | 0.7742 | ns      | 1.1225 | ns      | 1.4499 | 0.0478  |
| P07335 | Ckb       | 0.009512 | 0.9584 | ns      | 0.9032 | ns      | 1.3193 | ns      | 1.4607 | 0.0424  |

|        |        |          |        |        |        |         |        |        |        |         |
|--------|--------|----------|--------|--------|--------|---------|--------|--------|--------|---------|
| P07340 | Atp1b1 | 0.000134 | 0.9463 | ns     | 0.7604 | ns      | 1.1559 | ns     | 1.5201 | 0.0214  |
| P07483 | Fabp3  | 0.001454 | 1.0409 | ns     | 0.8441 | ns      | 0.9113 | ns     | 1.0797 | ns      |
| Q6LDS4 | Sod1   | 0.000716 | 1.0027 | ns     | 0.5241 | <0.0001 | 0.9559 | ns     | 1.8239 | 0.0004  |
| P07825 | Syp    | 0.004418 | 0.9499 | ns     | 0.5989 | 0.0008  | 0.9022 | ns     | 1.5066 | 0.025   |
| P08082 | Cltb   | 0.014797 | 0.9565 | ns     | 0.8132 | ns      | 1.0813 | ns     | 1.3297 | ns      |
| P08461 | Dlat   | 0.004791 | 0.9608 | ns     | 0.7826 | ns      | 1.2055 | ns     | 1.5404 | 0.016   |
| P09117 | Aldoc  | 0.003146 | 1.0410 | ns     | 0.7497 | ns      | 1.0800 | ns     | 1.4406 | ns      |
| P09606 | Glul   | 0.001340 | 0.9441 | ns     | 0.7609 | ns      | 1.3282 | ns     | 1.7456 | 0.0012  |
| P09951 | Syn1   | 0.000004 | 1.1096 | ns     | 0.8288 | ns      | 1.1442 | ns     | 1.3806 | ns      |
| P0DP31 | Calm2  | 0.006954 | 0.9511 | ns     | 0.6661 | 0.0113  | 1.2001 | ns     | 1.8016 | 0.0006  |
| P10111 | Ppia   | 0.002285 | 0.9124 | ns     | 0.6770 | 0.0161  | 1.2099 | ns     | 1.7872 | 0.0007  |
| P10760 | Ahcy   | 0.017151 | 1.0798 | ns     | 0.7921 | ns      | 1.1021 | ns     | 1.3913 | ns      |
| P10888 | Cox4i1 | 0.016971 | 0.8091 | ns     | 0.6342 | 0.0036  | 0.8646 | ns     | 1.3634 | ns      |
| P11348 | Qdpr   | 0.006581 | 0.8492 | ns     | 0.6417 | 0.0048  | 1.1341 | ns     | 1.7674 | 0.0009  |
| P11507 | Atp2a2 | 0.016255 | 0.8274 | ns     | 0.6460 | 0.0056  | 1.0112 | ns     | 1.5653 | 0.0124  |
| P11980 | Pkm    | 0.006165 | 0.9458 | ns     | 0.8773 | ns      | 1.2313 | ns     | 1.4034 | ns      |
| P13852 | Prnp   | 0.012896 | 0.8571 | ns     | 1.6310 | 0.0015  | 0.9892 | ns     | 0.6065 | 0.0044  |
| P15999 | Atp5a1 | 0.004732 | 0.9142 | ns     | 0.8033 | ns      | 1.1357 | ns     | 1.4138 | ns      |
| P16446 | Pitpna | 0.000001 | 0.9394 | ns     | 0.4716 | <0.0001 | 1.0798 | ns     | 2.2898 | <0.0001 |
| P16617 | Pgk1   | 0.000122 | 0.9649 | ns     | 0.7162 | 0.0495  | 1.2396 | ns     | 1.7308 | 0.0015  |
| P17105 | ItpkA  | 0.000156 | 1.0761 | ns     | 0.4616 | <0.0001 | 1.0432 | ns     | 2.2597 | <0.0001 |
| P18418 | Calr   | 0.003727 | 1.1172 | ns     | 0.8872 | ns      | 1.1060 | ns     | 1.2467 | ns      |
| P18420 | Psma1  | 0.020915 | 0.9272 | ns     | 1.3031 | ns      | 0.6333 | ns     | 0.4860 | ns      |
| P21571 | Atp5j  | 0.002897 | 0.9559 | ns     | 0.6410 | 0.0047  | 0.8198 | ns     | 1.2789 | ns      |
| P21575 | Dnm1   | 0.000268 | 0.9805 | ns     | 0.7918 | ns      | 1.1764 | ns     | 1.4856 | 0.0319  |
| P21707 | Syt1   | 0.000054 | 0.9601 | ns     | 0.6711 | 0.0134  | 1.1716 | ns     | 1.7456 | 0.0012  |
| P21913 | Sdhb   | 0.001096 | 1.1260 | ns     | 0.9116 | ns      | 1.4032 | 0.0299 | 1.5392 | 0.017   |
| P25113 | Pgam1  | 0.003889 | 0.9816 | ns     | 0.7740 | ns      | 1.2284 | ns     | 1.5871 | 0.0095  |
| P28480 | Tcp1   | 0.000531 | 1.0221 | ns     | 0.7356 | ns      | 1.0498 | ns     | 1.4272 | ns      |
| P29419 | Atp5i  | 0.000662 | 0.7130 | 0.0069 | 0.4202 | <0.0001 | 0.8323 | ns     | 1.9806 | <0.0001 |
| P31044 | Pebp1  | 0.000034 | 0.9194 | ns     | 0.6625 | 0.0101  | 1.3013 | ns     | 1.9641 | <0.0001 |

|        |          |          |        |    |        |         |        |    |        |         |
|--------|----------|----------|--------|----|--------|---------|--------|----|--------|---------|
| Q6PCU0 | Atp5c1   | 0.003997 | 0.9890 | ns | 0.8167 | ns      | 1.0253 | ns | 1.2555 | ns      |
| P35465 | Pak1     | 0.012900 | 1.1281 | ns | 1.0198 | ns      | 1.2658 | ns | 1.2412 | ns      |
| P35565 | Canx     | 0.009790 | 1.0605 | ns | 0.8544 | ns      | 1.0730 | ns | 1.2559 | ns      |
| P37377 | Snca     | 0.019524 | 1.0778 | ns | 0.7270 | ns      | 0.9383 | ns | 1.2907 | ns      |
| P45592 | Cfl1     | 0.010170 | 0.9824 | ns | 0.8025 | ns      | 1.1523 | ns | 1.4358 | ns      |
| P47942 | Dpysl2   | 0.000715 | 0.8837 | ns | 0.7249 | ns      | 1.1797 | ns | 1.6274 | 0.0057  |
| P47971 | Nptx1    | 0.000074 | 0.9731 | ns | 0.4589 | <0.0001 | 1.1198 | ns | 2.4400 | <0.0001 |
| P48500 | Tpi1     | 0.021500 | 1.0090 | ns | 0.8331 | ns      | 1.2698 | ns | 1.5243 | ns      |
| P50503 | St13     | 0.004682 | 1.2174 | ns | 0.5205 | <0.0001 | 1.0107 | ns | 1.9418 | <0.0001 |
| P54311 | Gnb1     | 0.000712 | 0.9956 | ns | 0.7263 | ns      | 1.3174 | ns | 1.8138 | 0.0005  |
| P54313 | Gnb2     | 0.005079 | 1.0242 | ns | 0.8038 | ns      | 1.2356 | ns | 1.5372 | 0.0174  |
| P54921 | Napa     | 0.000124 | 0.9706 | ns | 0.5860 | 0.0004  | 1.1309 | ns | 1.9300 | <0.0001 |
| P59215 | Gnao1    | 0.000764 | 0.9230 | ns | 0.7164 | 0.0497  | 0.9313 | ns | 1.3000 | ns      |
| P60841 | Ensa     | 0.000001 | 0.9388 | ns | 0.5746 | 0.0003  | 0.9270 | ns | 1.6134 | 0.0068  |
| P60881 | Snap25   | 0.020714 | 0.8239 | ns | 0.6295 | ns      | 0.7426 | ns | 1.1797 | ns      |
| P60905 | Dnajc5   | 0.009092 | 0.9404 | ns | 0.6164 | 0.0018  | 1.1160 | ns | 1.8103 | 0.0005  |
| P62076 | Timm13   | 0.008128 | 0.8086 | ns | 0.5927 | 0.0006  | 1.1859 | ns | 2.0008 | <0.0001 |
| P62260 | Ywhae    | 0.000084 | 1.0691 | ns | 0.8099 | ns      | 1.0358 | ns | 1.2790 | ns      |
| P62762 | Vsnl1    | 0.002715 | 0.9041 | ns | 0.7051 | 0.0368  | 1.0914 | ns | 1.5479 | 0.0153  |
| P62804 | Hist1h4b | 0.015090 | 0.9720 | ns | 0.7072 | 0.039   | 1.1756 | ns | 1.6624 | 0.0036  |
| Q3ZB97 | Ap2b1    | 0.015430 | 1.0584 | ns | 0.9990 | ns      | 1.3315 | ns | 1.3329 | ns      |
| P62963 | Pfn1     | 0.001575 | 1.0537 | ns | 0.6897 | 0.0238  | 1.2543 | ns | 1.8185 | 0.0005  |
| P63012 | Rab3a    | 0.020993 | 0.9619 | ns | 0.7976 | ns      | 1.1245 | ns | 1.4098 | ns      |
| P63018 | Hspa8    | 0.000214 | 0.9579 | ns | 0.7879 | ns      | 1.1461 | ns | 1.4546 | 0.0453  |
| Q9WUW2 | Vamp2    | 0.018888 | 0.8078 | ns | 0.6153 | 0.0017  | 0.8817 | ns | 1.4330 | ns      |
| P63170 | Dynll1   | 0.006536 | 0.8158 | ns | 0.6542 | 0.0075  | 1.2587 | ns | 1.9241 | 0.0001  |
| P63245 | Gnb2l1   | 0.014406 | 0.9256 | ns | 0.4792 | <0.0001 | 0.8999 | ns | 1.8779 | 0.0002  |
| P63322 | Rala     | 0.000639 | 0.8398 | ns | 0.7443 | ns      | 1.1406 | ns | 1.5324 | 0.0185  |
| P63329 | Ppp3ca   | 0.006945 | 0.9947 | ns | 0.9489 | ns      | 1.2727 | ns | 1.3413 | ns      |
| P63331 | Ppp2ca   | 0.019454 | 0.9432 | ns | 0.8531 | ns      | 1.3090 | ns | 1.5345 | ns      |
| P68035 | Actc1    | 0.012696 | 0.9255 | ns | 0.4356 | <0.0001 | 1.0811 | ns | 2.4818 | <0.0001 |

|        |          |          |        |    |        |         |        |        |        |         |
|--------|----------|----------|--------|----|--------|---------|--------|--------|--------|---------|
| P68370 | Tuba1a   | 0.008892 | 0.9420 | ns | 0.7216 | ns      | 1.1463 | ns     | 1.5886 | 0.0093  |
| P81155 | Vdac2    | 0.011071 | 0.8080 | ns | 0.6788 | 0.0171  | 1.0788 | ns     | 1.5892 | 0.0093  |
| P84076 | Hpca     | 0.011048 | 0.9327 | ns | 0.6898 | 0.0003  | 1.2299 | ns     | 1.7829 | 0.0008  |
| P84083 | Arf5     | 0.010884 | 0.9991 | ns | 1.7241 | ns      | 1.0168 | ns     | 0.5898 | 0.0024  |
| P84087 | Cplx2    | 0.000023 | 0.9972 | ns | 0.6151 | 0.0017  | 1.0529 | ns     | 1.7117 | 0.0019  |
| P85108 | Tubb2a   | 0.008599 | 0.9474 | ns | 0.7705 | ns      | 1.2909 | ns     | 1.6754 | 0.0031  |
| P85834 | Tufm     | 0.000974 | 0.8643 | ns | 0.7169 | ns      | 0.9406 | ns     | 1.3120 | ns      |
| P97546 | Nptn     | 0.006064 | 0.9784 | ns | 0.6130 | 0.0015  | 1.0109 | ns     | 1.6491 | 0.0043  |
| P97685 | Nfasc    | 0.010265 | 0.9155 | ns | 0.8035 | ns      | 1.0489 | ns     | 1.3054 | ns      |
| P97846 | Cntnap1  | 0.003288 | 0.8885 | ns | 0.4690 | <0.0001 | 1.0365 | ns     | 2.2100 | <0.0001 |
| Q05982 | Nme1     | 0.000398 | 1.0457 | ns | 0.5775 | 0.0003  | 0.8827 | ns     | 1.5286 | 0.0193  |
| Q06647 | Atp5o    | 0.003517 | 0.9278 | ns | 0.6625 | 0.01    | 1.2739 | ns     | 1.9229 | 0.0001  |
| Q3T1K5 | Capza2   | 0.013855 | 0.9238 | ns | 0.7819 | ns      | 1.2381 | ns     | 1.5834 | 0.0099  |
| Q3ZAU6 | Rnf14    | 0.000083 | 1.0083 | ns | 2.5251 | <0.0001 | 1.3781 | 0.0434 | 0.5458 | 0.0004  |
| Q45QK6 | Gng2     | 0.000983 | 1.0342 | ns | 0.5604 | 0.0001  | 1.1184 | ns     | 1.9958 | <0.0001 |
| Q52KS1 | Pfkm     | 0.000597 | 0.9825 | ns | 0.7466 | ns      | 1.1719 | ns     | 1.5695 | 0.0118  |
| Q568Z9 | Phyhip   | 0.000621 | 1.0874 | ns | 0.8656 | ns      | 1.3178 | ns     | 1.5224 | 0.0111  |
| Q5BJT9 | Ckmt1b   | 0.000449 | 0.8880 | ns | 0.7493 | ns      | 1.1796 | ns     | 1.5743 | ns      |
| Q5D023 | Dync1li2 | 0.001327 | 1.2252 | ns | 2.2561 | <0.0001 | 1.0273 | ns     | 0.4553 | <0.0001 |
| Q5RKI1 | Eif4a2   | 0.000012 | 1.1019 | ns | 0.6546 | 0.0076  | 1.0421 | ns     | 1.5919 | 0.0089  |
| Q5XI73 | Arhgdia  | 0.000388 | 0.9504 | ns | 0.6344 | 0.0036  | 1.1818 | ns     | 1.8629 | 0.0003  |
| Q5XIT1 | Mapre3   | 0.012880 | 1.0288 | ns | 0.7913 | ns      | 0.9802 | ns     | 1.2387 | ns      |
| Q62634 | Slc17a7  | 0.002786 | 1.1110 | ns | 0.6400 | 0.0045  | 0.7886 | ns     | 1.2321 | ns      |
| Q62718 | Ntm      | 0.001897 | 0.9125 | ns | 0.6214 | 0.0022  | 0.8446 | ns     | 1.3591 | ns      |
| Q62950 | Crmp1    | 0.013517 | 0.8970 | ns | 0.7989 | ns      | 1.2653 | ns     | 1.5837 | 0.0099  |
| Q63377 | Atp1b3   | 0.000113 | 0.8798 | ns | 0.4698 | <0.0001 | 1.2170 | ns     | 2.5905 | <0.0001 |
| Q63413 | Ddx39b   | 0.000273 | 0.9308 | ns | 0.3730 | 0.0015  | 1.1979 | ns     | 3.2116 | <0.0001 |
| Q63564 | Sv2b     | 0.020659 | 0.9594 | ns | 0.6867 | ns      | 0.8696 | ns     | 1.2664 | ns      |
| Q63633 | Slc12a5  | 0.001412 | 0.9537 | ns | 0.7574 | ns      | 1.0539 | ns     | 1.3914 | ns      |
| Q63716 | Prdx1    | 0.001545 | 0.9866 | ns | 0.7228 | ns      | 0.8848 | ns     | 1.2241 | ns      |
| Q64548 | Rtn1     | 0.001645 | 0.9902 | ns | 0.6129 | 0.0015  | 1.0154 | ns     | 1.6566 | 0.0039  |

|        |          |          |        |        |        |         |        |    |        |         |
|--------|----------|----------|--------|--------|--------|---------|--------|----|--------|---------|
| Q66HF1 | Ndufs1   | 0.000018 | 0.9728 | ns     | 0.7410 | ns      | 1.0720 | ns | 1.4468 | 0.0495  |
| Q68FX0 | Idh3B    | 0.000820 | 0.8844 | ns     | 0.7202 | ns      | 1.1024 | ns | 1.5307 | 0.0188  |
| Q68FY0 | Uqcrc1   | 0.002088 | 1.0478 | ns     | 0.8727 | ns      | 1.1762 | ns | 1.3478 | ns      |
| Q6P3V9 | Rpl4     | 0.000081 | 0.7940 | ns     | 0.3474 | ns      | 0.7528 | ns | 2.1669 | <0.0001 |
| Q6P7D2 | Rnpep    | 0.002393 | 1.0640 | ns     | 1.9025 | <0.0001 | 1.0270 | ns | 0.5398 | 0.0003  |
| Q6P9V6 | Psma5    | 0.000707 | 0.9222 | ns     | 0.6498 | 0.0064  | 1.0189 | ns | 1.5679 | 0.012   |
| Q6P9Y4 | Slc25a4  | 0.000699 | 0.8995 | ns     | 0.7036 | 0.0353  | 0.9902 | ns | 1.4075 | ns      |
| Q6PDU7 | Atp5l    | 0.001504 | 0.9245 | ns     | 0.6256 | 0.0026  | 1.1296 | ns | 1.8055 | 0.0006  |
| Q6PDW1 | Rps12    | 0.000074 | 0.9536 | ns     | 0.4089 | <0.0001 | 0.9337 | ns | 2.2832 | <0.0001 |
| Q6URK4 | Hnrnpa3  | 0.000313 | 1.1195 | ns     | 0.6609 | 0.0095  | 1.0711 | ns | 1.6206 | 0.0062  |
| Q6XVN8 | Map1lc3a | 0.014226 | 0.7754 | ns     | 0.3039 | <0.0001 | 0.7368 | ns | 2.4246 | <0.0001 |
| Q71RR7 | Guk1     | 0.014633 | 1.0667 | ns     | 1.2758 | ns      | 0.7495 | ns | 0.5875 | 0.0022  |
| Q78P75 | Dynll2   | 0.013955 | 0.8445 | ns     | 0.6824 | 0.019   | 1.1794 | ns | 1.7284 | 0.0015  |
| Q7TQ16 | Uqcrq    | 0.008212 | 0.8424 | ns     | 0.7197 | ns      | 1.0444 | ns | 1.4511 | 0.047   |
| Q812E9 | Gpm6a    | 0.011244 | 1.0183 | ns     | 0.5149 | <0.0001 | 0.9297 | ns | 1.8056 | 0.0006  |
| Q8K4Y5 | Lgi1     | 0.001537 | 0.8990 | ns     | 0.7474 | ns      | 1.0378 | ns | 1.3886 | ns      |
| Q9EPH8 | Pabpc1   | 0.014480 | 0.8802 | ns     | 0.5900 | 0.0005  | 1.1328 | ns | 1.9200 | 0.0001  |
| Q9EQS0 | Taldo1   | 0.001774 | 0.9553 | ns     | 1.9420 | <0.0001 | 1.1817 | ns | 0.6085 | 0.0047  |
| Q9ER34 | Aco2     | 0.000204 | 1.0112 | ns     | 0.7878 | ns      | 1.1666 | ns | 1.4808 | 0.0338  |
| Q9ERH3 | Wdr7     | 0.003949 | 0.7866 | ns     | 0.3605 | <0.0001 | 0.8920 | ns | 2.4742 | <0.0001 |
| Q9JHL4 | Dbnl     | 0.010594 | 1.3598 | 0.0166 | 1.5724 | 0.0039  | 1.0080 | ns | 0.6411 | 0.0133  |
| Q9JHY2 | Sfxn3    | 0.011218 | 0.7944 | ns     | 0.7911 | ns      | 1.0655 | ns | 1.3469 | ns      |
| Q9JJ19 | Slc9a3r1 | 0.000482 | 1.2331 | ns     | 2.1402 | <0.0001 | 1.2915 | ns | 0.6035 | 0.0039  |
| Q9R063 | Prdx5    | 0.000695 | 0.9039 | ns     | 0.7360 | ns      | 1.2734 | ns | 1.7301 | 0.0015  |
| Q9R0I8 | Pip4k2a  | 0.003146 | 1.1120 | ns     | 0.5159 | <0.0001 | 0.9869 | ns | 1.9128 | 0.0001  |
| Q9WV97 | Timm9    | 0.001724 | 1.1003 | ns     | 0.4385 | <0.0001 | 0.8242 | ns | 1.8799 | 0.0002  |
| Q9Z0W5 | Pacsin1  | 0.010111 | 1.1281 | ns     | 0.9032 | ns      | 1.1556 | ns | 1.2794 | ns      |
| Q9Z2L0 | Vdac1    | 0.006548 | 0.8253 | ns     | 0.7294 | ns      | 1.0859 | ns | 1.4887 | 0.038   |
