# Supplementary material for: Global Proteome Profiling of the Temporal Cortex of Female Rats Exposed to Chronic Stress and the Western Diet
Source: MDPI journal article supplement (doi:10.3390/nu14091934), 2022-05-05
Supplement: s1 [file s1]

Table S1A. Summary of macronutrient composition of the diets used in the present study.

| Name                | Standard diet (STD) | Western diet (WD) Set 1                | Western diet (WD) Set 2                             |
|---------------------|---------------------|----------------------------------------|-----------------------------------------------------|
| Content             | Lobofeed B          | Sausage<br>Crakers<br>Candy bar (Mars) | Tilsit cheese<br>Potato chips<br>Candy bar (Bounty) |
| Total Kcal/g        | 3.57                | 4.56                                   | 5.13                                                |
| <b>FAT</b>          |                     |                                        |                                                     |
| Kcal/g              | 0.25                | 2.79                                   | 3.15                                                |
| % fat               | 8%                  | 31%                                    | 35.3%                                               |
| <b>PROTEIN</b>      |                     |                                        |                                                     |
| Kcal/g              | 0.77                | 0.48                                   | 0.80                                                |
| % prot              | 25%                 | 12.8%                                  | 20.4%                                               |
| <b>CARBOHYDRATE</b> |                     |                                        |                                                     |
| Kcal/g              | 2.6                 | 1.8                                    | 0.85                                                |
| % carb              | 67%                 | 45.1%                                  | 21.4%                                               |

Table S1B. Western diet composition.

|                                                                    | <b>Total<br/>kcal/100g</b> | <b>Protein g</b> | <b>Total fat g</b> | <b>Total Carb g</b> | <b>Dietary<br/>fiber g</b> | <b>Sodium g</b> |
|--------------------------------------------------------------------|----------------------------|------------------|--------------------|---------------------|----------------------------|-----------------|
| <b>Polish dry<br/>sausage<br/>made of<br/>pork;<br/>Tarczyński</b> | 611                        | 26               | 55                 | 3                   | 0                          | 3.3             |
| <b>Tilsit cheese<br/>Hochland</b>                                  | 356                        | 25.6             | 27.9               | 0.1                 | 0                          | 1.25            |
| <b>potato chips;<br/>Lays Salt,<br/>Pepsi Co.</b>                  | 526                        | 32               | 52                 | 5.9                 | 1.4                        | 4.4             |
| <b>crakers<br/>(Lajkonik)</b>                                      | 476                        | 8.8              | 21                 | 62                  | 1.7                        | 2.3             |
| <b>Candy bar<br/>Bounty<br/>(Mars Inc.)</b>                        | 488                        | 3.7              | 26.1               | 58.3                | 0                          | 0.26            |
| <b>Candy bar<br/>Mars (Mars<br/>Inc.)</b>                          | 452                        | 3.7              | 17                 | 70.3                | 0                          | 0.39            |
| <b>10% fructose<br/>solution</b>                                   | 398                        | 0                | 0                  | 99.8                | 0                          | 0               |
