# Supplementary material for: Global Proteome Profiling of the Temporal Cortex of Female Rats Exposed to Chronic Stress and the Western Diet
Source: Nutrients. 2022 May 5;14(9):1934. doi: 10.3390/nu14091934 (PMC9103025; doi:10.3390/nu14091934)
Supplement: Supplementary file 1 [file nutrients-14-01934-s001.zip]

Archive with 6 entries (6 files):
- Figure S 1.jpg
- Figure S 2.pdf
- Supplementary data S1.xlsx
- Supplementary data S2.xlsx
- Table S 2 Table summarized fold changes.pdf
- Table S1A,B Western diet composition.pdf
