# Supplementary material for: Global Proteome Profiling of the Temporal Cortex of Female Rats Exposed to Chronic Stress and the Western Diet
Source: Nutrients. 2022 May 5;14(9):1934. doi: 10.3390/nu14091934 (PMC9103025; doi:10.3390/nu14091934)
Supplement: Supplementary file 1 [file nutrients-14-01934-s001.zip › Supplementary data S1.xlsx]

## Sheet: MS data
LFQ intensity C12_0M	LFQ intensity C12_1_0M	LFQ intensity C12_1_1M	LFQ intensity C12_1_2M	LFQ intensity C12_1_3M	LFQ intensity C12_1_4M	LFQ intensity C12_3_2M	LFQ intensity C14_0M	LFQ intensity C14_1M	LFQ intensity C14_2M	LFQ intensity C14_3M	LFQ intensity D12_1_1M	LFQ intensity D12_1_2M	LFQ intensity D12_1_3M	LFQ intensity D12_1_4M	LFQ intensity D12_1_5M	LFQ intensity D12_3_0M	LFQ intensity D12_3_1M	LFQ intensity D12_3_2M	LFQ intensity D12_3_3M	LFQ intensity D12_3_5M	LFQ intensity D12_3_6M	LFQ intensity DS_12_2_1M	LFQ intensity DS12_2_0M	LFQ intensity DS12_2_2M	LFQ intensity DS12_2_3M	LFQ intensity DS12_2_4M	LFQ intensity DS12_2_5M	LFQ intensity S12_1_0M	LFQ intensity S12_1_2M	LFQ intensity S12_1_3M	LFQ intensity S12_1_4M_171207154648	LFQ intensity S12_1_5M	Only identified by site	Reverse	Potential contaminant	ANOVA Significant	Peptides	Razor + unique peptides	Unique peptides	Sequence coverage [%]	Unique + razor sequence coverage [%]	Unique sequence coverage [%]	Mol. weight [kDa]	Q-value	Score	Intensity	MS/MS Count	ANOVA p value	ANOVA q-value
#!{Type}E	E	E	E	E	E	E	E	E	E	E	E	E	E	E	E	E	E	E	E	E	E	E	E	E	E	E	E	E	E	E	E	E	C	C	C	C	N	N	N	N	N	N	N	N	N	N	N	N	N
#!{C:czas}12 tyg.	12 tyg.	12 tyg.	12 tyg.	12 tyg.	12 tyg.	12 tyg.	12 tyg.	12 tyg.	12 tyg.	12 tyg.	12 tyg.	12 tyg.	12 tyg.	12 tyg.	12 tyg.	12 tyg.	12 tyg.	12 tyg.	12 tyg.	12 tyg.	12 tyg.	12 tyg.	12 tyg.	12 tyg.	12 tyg.	12 tyg.	12 tyg.	12 tyg.	12 tyg.	12 tyg.	12 tyg.	12 tyg.
#!{C:grupa}CTR	CTR	CTR	CTR	CTR	CTR	CTR	CTR	CTR	CTR	CTR	WD	WD	WD	WD	WD	WD	WD	WD	WD	WD	WD	WD/CS	WD/CS	WD/CS	WD/CS	WD/CS	WD/CS	CS	CS	CS	CS	CS
30.7214	30.5966	30.7644	30.622	30.6077	30.4296	30.7508	30.7814	30.8753	30.5325	30.5992	30.69	30.446	30.8423	30.3724	30.4182	30.5957	30.6381	30.5676	30.2294	30.5772	30.5488	30.8377	31.5048	30.5176	30.9858	30.6196	30.7214	30.2049	30.2349	30.6346	30.1109	30.1079				+	43	43	43	43.6	43.6	43.6	149.6	0	323.31	291730000000	3766	0.000375259	0.00521212
28.3056	28.2847	28.6548	28.6254	28.6688	28.802	28.7362	28.5975	28.7746	28.2497	28.4775	28.3468	28.8457	28.267	28.7165	28.6889	28.2882	28.4798	28.7718	28.021	28.1733	28.5719	28.8087	29.6905	28.6855	28.9087	28.5523	28.9265	29.0534	28.7097	28.6345	29.0732	29.3323				+	17	17	17	57.2	57.2	57.2	40.749	0	248.76	77180000000	1244	0.00275706	0.0103846
25.9269	26.2187	26.3721	26.7802	26.1452	26.5703	26.2854	26.9324	26.2038	26.6701	26.419	25.8697	26.8509	26.0359	27.2642	26.5337	26.1038	26.041	26.0173	27.5566	26.4812	26.2167	26.0349	24.5026	26.5714	25.1832	26.4066	25.9353	26.7725	27.3583	27.0143	26.6289	26.5021				+	6	6	6	36.1	36.1	36.1	25.303	0	35.613	15726000000	162	0.0117881	0.0312299
26.3025	26.5602	26.6164	26.4827	26.6274	26.9285	26.3267	25.9603	26.7623	26.5488	26.6648	26.4225	27.0204	26.4568	27.1547	26.9741	26.3663	26.4726	27.1457	27.3403	26.9705	26.7077	26.7242	26.4455	26.795	26.2362	26.0392	26.5257	27.7749	26.506	26.8681	27.8712	27.7271				+	16	9	3	48	31	13.7	28.512	0	63.953	20712000000	470	0.000839349	0.00575439
29.1987	29.2089	28.8757	29.2136	28.9012	29.522	29.0657	28.8184	29.1383	29.1992	29.3828	28.9351	28.8941	29.0416	28.9346	29.0616	29.0985	29.3279	29.1604	26.9729	29.0996	29.0631	29.7906	30.5628	29.4158	28.9888	29.1868	28.6284	27.9644	28.562	29.0123	28.8032	27.8162				+	13	12	12	48.8	45.2	45.2	30.783	0	195.65	100370000000	786	0.0211428	0.0488034
27.217	27.168	27.2445	27.4951	27.1235	27.5492	27.2614	27.3447	27.6142	27.2285	27.5195	27.3849	26.8884	27.2203	27.2039	27.3596	26.7908	27.231	26.8029	25.5637	27.2591	27.144	27.5488	28.6189	26.8057	27.2582	27.0773	27.3587	26.8304	26.7581	26.5371	26.8527	26.6542				+	5	5	5	12.3	12.3	12.3	38.927	0	43.505	28130000000	556	0.0153757	0.0377251
28.7259	28.8554	28.5729	28.5008	28.5792	28.5336	28.3651	28.2723	28.5123	28.4415	28.4259	28.6505	28.4133	28.6473	28.3274	28.4996	28.6074	28.7427	27.9962	28.559	27.9868	28.4409	28.7301	29.4981	28.7174	28.4763	28.6047	28.6942	28.0247	28.3966	28.4463	27.9593	28.3669				+	32	32	32	35.6	35.6	35.6	140	0	323.31	69621000000	946	0.00768067	0.0236267
25.6398	25.7483	25.9463	25.8596	25.5451	25.6274	25.1374	24.2282	25.6542	25.7244	25.9985	26.0794	26.266	26.1746	26.2152	25.8918	25.2759	25.6995	26.0183	26.3952	26.3058	25.8425	24.9102	24.5906	25.5217	25.0439	25.6052	25.8105	25.4429	25.9073	26.0234	25.7042	25.0657				+	10	8	8	24.6	21.3	21.3	64.713	0	141.53	9179500000	195	0.00859954	0.0251069
26.3093	26.9101	25.7329	28.0192	28.8082	26.8715	27.9093	24.4413	27.0499	27.8503	26.6476	28.2859	27.3695	27.6023	28.6997	27.4907	27.6755	27.4205	27.1503	25.6349	27.3162	27.3032	26.4998	25.3162	27.3158	27.1889	27.258	26.5191	24.006	25.4174	27.274	25.5689	24.9185				+	11	1	0	74.8	7.5	0	15.988	0	15.778	38529000000	279	0.00821664	0.0244387
29.0537	28.9833	28.7954	28.6254	28.836	28.6504	29.0761	28.617	29.041	28.6855	28.8837	29.1775	28.8015	29.0406	28.6938	28.9055	29.0733	28.824	28.9829	29.1207	28.9424	29.0298	29.0454	29.6516	28.5778	29.2361	28.8179	29.0133	28.4408	28.3017	28.7901	28.5036	28.4907				+	19	19	19	64.3	64.3	64.3	46.222	0	199.57	90540000000	804	0.00104376	0.00625
30.5142	30.1864	30.303	30.4205	30.3472	30.4994	30.2538	30.1679	30.1864	30.3541	30.414	30.2828	30.0804	30.3225	30.0903	30.0795	30.4438	30.5361	30.1507	29.4607	30.0328	30.3797	30.6552	31.6318	30.446	30.1326	30.5666	30.3725	29.6084	29.8803	30.0967	29.9807	29.6782				+	26	26	24	63	63	60.2	43.113	0	323.31	244470000000	2476	0.00105274	0.00615385
25.838	25.6133	26.2475	26.2513	26.1967	26.1025	26.3932	27.2551	26.1137	26.2544	26.1013	26.58	26.715	26.7106	26.9069	26.6623	26.2439	25.9992	26.2383	26.376	26.599	26.0972	25.8073	27.2255	26.1527	26.742	25.8974	25.9078	27.3141	26.8953	26.7653	28.5178	26.5777				+	10	10	8	51.8	51.8	41.2	28.253	0	54.656	13959000000	251	0.00437152	0.014
28.2048	28.294	28.0786	28.0691	28.1434	28.2436	27.803	28.0876	28.2767	28.1046	28.2807	28.0093	28.0965	28.1689	28.0216	28.1348	27.9392	28.1137	28.0623	27.9689	27.8382	27.9477	28.0067	28.5145	27.9693	28.072	27.9744	28.0163	27.4179	27.2051	28.032	27.6647	27.2561				+	18	18	18	29.4	29.4	29.4	87.731	0	184.16	48050000000	746	6.42261e-06	0
33.5618	33.3615	33.4232	33.379	33.5678	33.5347	33.3593	33.3473	33.606	33.4869	33.4119	33.4854	33.3896	33.5135	33.3991	33.4229	33.657	33.5382	33.5873	33.8347	33.4395	33.5117	33.6544	34.0253	33.5496	33.4508	33.5044	33.6803	33.0734	33.187	33.3939	33.1115	33.0686				+	197	197	1	79.2	79.2	0.8	286.71	0	323.31	2213400000000	25130	2.96545e-05	0
30.1544	29.8028	29.8242	29.9665	29.9167	29.8631	30.0118	30.1953	30.0991	30.0821	30.0724	29.8032	29.9265	30.0401	30.0274	29.9539	30.0716	29.9712	30.0895	30.2775	30.0765	30.0999	30.2001	30.7153	30.1966	30.0639	30.0736	29.9263	29.8394	30.0863	29.8411	29.7929	29.6581				+	23	23	3	33.2	33.2	7.7	91.429	0	323.31	215920000000	3049	0.0136242	0.0349091
26.1577	26.7565	27.0467	26.9756	26.8345	27.7312	26.738	24.4151	26.8097	26.9858	27.1699	26.6323	27.9381	27.0631	27.7283	27.4253	26.1078	26.661	27.3055	28.3622	27.2983	27.5003	26.6193	28.649	27.3155	26.5922	26.8497	26.6084	29.571	26.3817	27.1798	29.9931	29.3735				+	24	3	3	83.6	16.4	16.4	21.719	0	130.45	37748000000	547	0.0111908	0.0303204
27.6042	27.9479	27.8055	27.8536	27.632	27.9817	27.937	29.0064	27.6764	27.7531	27.9843	28.1454	27.4623	27.7694	27.7817	27.9922	27.2156	27.936	27.1745	27.6883	27.8603	27.524	28.1547	28.3808	27.5877	28.1072	27.5333	27.4654	26.7866	27.9135	27.6303	27.1299	26.0389				+	11	11	11	51.8	51.8	51.8	33.528	0	167.98	39188000000	630	0.0097622	0.0275765
31.6875	31.5368	31.5602	31.3309	31.5759	31.6199	31.5275	31.0691	31.6518	31.4452	31.4946	31.647	31.6548	31.5472	31.4656	31.5337	31.7037	31.5843	31.6512	31.5502	31.5604	31.6256	31.6216	32.3559	31.6761	31.5228	31.5849	31.7221	31.4325	31.1264	31.5018	31.3288	31.5267				+	120	120	2	57.2	57.2	1.8	299.66	0	323.31	600440000000	8179	0.0117235	0.0312688
29.0163	28.8038	29.131	29.3919	28.6586	29.2795	29.5382	29.1871	28.7827	29.3681	29.1786	29.1873	28.2681	29.2203	28.5693	29.0391	28.7014	29.1629	28.3129	28.3621	29.0501	28.9014	29.2505	28.0273	28.538	29.1682	28.6409	28.4876	28.4883	28.4074	28.5565	28.4279	28.334				+	19	19	16	74.3	74.3	65.3	34.662	0	323.31	89996000000	846	0.00421128	0.0136825
26.5387	26.6199	26.8458	27.0781	26.9522	27.1285	26.4822	26.1161	26.8303	26.8717	27.0595	26.5949	27.004	26.3766	26.798	26.5846	26.7873	26.8028	26.9128	26.0421	26.5454	27.047	26.6859	26.5166	26.6693	26.2969	26.4137	26.4138	25.3201	25.5711	26.5471	26.3917	25.5505				+	4	4	4	28.8	28.8	28.8	13.241	0	31.554	18233000000	85	0.000184973	0.00261538
27.4362	26.7402	27.039	27.1308	27.7934	27.2555	26.3841	25.8236	27.2318	27.3152	26.8833	27.1384	26.5435	26.9446	27.1613	26.4272	27.9172	27.491	27.4387	27.7192	26.9117	27.5168	27.6274	25.6843	27.5468	26.9879	27.5366	28.1958	25.9023	25.3731	26.9388	26.7723	25.6084				+	9	9	6	44.1	44.1	27.2	24.677	0	94.656	30510000000	299	0.0134073	0.0349278
30.3738	30.203	30.2118	30.2731	30.2423	30.0902	30.3477	30.7734	30.2685	30.3998	30.4339	30.432	30.4153	30.3103	30.1874	30.1263	30.4131	30.262	30.1341	30.0743	30.2953	30.3251	30.5819	31.2787	30.4091	30.6277	30.4008	30.3084	30.3431	30.1866	30.0473	29.8834	29.939				+	101	101	4	35.5	35.5	1.5	427.26	0	323.31	261940000000	3793	0.00223867	0.008875
28.7568	28.431	28.5341	28.6563	28.648	28.3763	28.6218	28.6937	28.5606	28.6908	28.6548	28.7892	28.465	28.7715	28.7625	28.3197	28.6173	28.6824	28.7235	28.8291	28.7511	28.5549	28.9394	28.3082	28.6367	28.7008	28.6942	28.7305	27.7996	28.2695	28.372	28.2902	27.9655				+	15	15	15	47	47	47	46.634	0	309.84	78189000000	906	1.87855e-05	0
26.9215	26.9891	26.7506	26.5756	26.6163	26.623	26.5052	26.8776	26.6998	26.6301	26.795	26.9272	26.621	27.0079	26.4865	26.8358	26.8666	26.7212	26.414	25.9981	26.6678	26.633	27.1289	27.9887	26.7924	26.6367	27.1359	26.7067	26.0391	26.2356	26.7369	26.0901	26.4721				+	4	4	4	79	79	79	7.099	0	36.584	20300000000	459	0.00312906	0.0115273
32.7161	32.5792	32.5164	32.3565	32.5575	32.5107	32.5596	32.4792	32.6974	32.4517	32.5331	32.6381	32.4483	32.5699	32.3052	32.4721	32.6846	32.6431	32.6732	32.5161	32.5068	32.4932	32.6362	32.9314	32.6055	32.7647	32.5297	32.7484	32.184	32.211	32.4748	32.1777	32.3343				+	161	161	150	75	75	70.7	273.58	0	323.31	1205300000000	15030	2.69014e-05	0
28.5317	28.4285	28.6474	28.5137	28.3218	28.1828	28.4482	28.6035	28.3325	28.4064	28.4497	28.4765	28.3637	28.518	28.1685	28.4417	28.2249	28.2733	27.7147	27.7083	28.4586	28.1163	28.5172	27.7904	28.1873	28.7674	28.3873	28.314	28.0418	28.081	28.1191	27.8886	27.693				+	12	12	12	71.8	71.8	71.8	21.203	0	194.03	62635000000	750	0.0072761	0.0225405
29.3015	29.0949	29.0263	28.793	28.8132	28.6719	28.8082	28.7944	28.8444	28.6449	28.7815	28.8054	28.8241	28.7773	28.5713	28.8157	28.9447	28.7438	28.5853	28.3996	28.9347	28.7792	28.9066	29.5991	28.73	29.0281	28.8466	28.7244	28.5441	28.3769	28.8423	28.3333	28.6442				+	19	19	0	65.9	65.9	0	40.49	0	140.29	88976000000	948	0.0142094	0.036
30.8059	30.7543	30.56	30.7265	30.5563	30.5632	30.6431	30.6699	30.5879	30.4797	30.6507	30.8086	30.5847	30.7067	30.4275	30.6857	30.763	30.578	30.3149	30.7267	30.7109	30.477	30.87	31.7342	30.8104	30.7166	30.7319	30.7884	30.3224	30.4245	30.605	30.2409	30.2837				+	19	19	19	57.7	57.7	57.7	46.192	0	323.31	300510000000	3648	0.000844793	0.00565517
29.9168	29.8791	29.6203	29.9732	29.9386	30.0832	29.8295	30.1518	29.8849	30.039	29.7606	29.8734	29.6678	29.7166	29.7469	29.6026	30.086	29.9967	29.7404	30.1488	29.6758	29.9682	30.457	30.7883	30.1307	29.643	30.3824	30.165	29.3162	30.37	29.6381	29.3627	29.5956				+	9	9	9	26.7	26.7	26.7	55.26	0	323.31	217030000000	2940	0.00473215	0.0147068
28.8512	29.0275	28.8427	29.0774	28.8545	28.8981	29.0277	29.233	28.8211	28.8839	29.0436	28.81	28.5897	28.9086	28.9595	28.9424	29.026	28.8176	28.5372	28.9284	28.6479	28.9241	29.1939	29.2357	28.992	29.1868	28.6574	28.595	28.5911	28.1905	28.721	28.5312	28.5511				+	11	11	4	50.5	50.5	21.2	23.545	0	65.715	102660000000	628	0.000658572	0.00586667
27.5601	27.4443	27.3777	27.1794	27.3163	27.1688	27.5017	25.8586	27.5808	27.3421	27.3765	27.4641	27.1392	27.4443	27.1152	27.5006	27.182	27.2412	27.2093	27.1642	27.324	27.2953	27.2775	27.5465	26.9564	27.0504	27.3621	27.4333	26.028	26.0415	27.0482	26.6543	26.4246				+	7	7	7	40.4	40.4	40.4	17.587	0	22.653	26014000000	314	0.000482005	0.00572973
26.5869	26.6897	27.1638	26.6284	26.9485	27.0022	27.0866	27.1047	26.6188	26.7757	26.7714	26.8917	26.8763	26.8551	26.9552	27.0341	26.2157	26.8168	26.1257	26.4708	26.869	26.8119	26.4319	23.4486	26.4279	26.3086	26.4897	26.2052	26.1901	26.1062	26.6491	26.25	26.328				+	12	12	12	44.7	44.7	44.7	29.466	0	79.999	20695000000	333	0.0083685	0.0248462
30.2118	30.1718	30.108	30.0576	30.2227	30.0155	29.8922	29.6116	30.1925	29.8786	29.945	30.2241	29.9599	30.1184	30.0917	29.9642	30.2285	30.1873	30.1676	30.3128	29.7871	30.0101	30.3252	29.8641	30.1725	30.0677	30.0657	30.3189	28.5224	29.4556	29.9931	29.5316	29.1165				+	25	25	15	61.8	61.8	42.9	48.778	0	323.31	197440000000	2126	2.24064e-05	0
26.2693	26.5552	26.1964	26.7792	26.6835	27.2844	26.4185	26.3897	26.3116	27.0681	26.5973	26.9579	26.9317	26.4665	26.8305	26.8277	26.7341	26.7685	26.4122	27.4224	26.3813	27.0159	26.6273	26.7139	26.7586	26.2446	26.8498	26.4495	25.7055	26.3681	26.2376	26.103	25.3824				+	8	8	4	37.2	37.2	17.2	27.231	0	49.155	19485000000	229	0.000541805	0.0057
26.9658	26.7383	27.0618	26.7948	26.8489	26.9783	26.6358	27.1186	27.1988	26.9139	26.5774	26.9548	25.9338	26.8792	26.7958	26.7593	26.997	27.0307	26.9396	27.4394	26.9211	27.1451	26.9221	25.119	27.0355	26.4924	26.5586	27.0718	25.6206	25.2531	27.1275	26.5234	25.6125				+	11	11	10	24	24	21.9	60.228	0	74.973	20265000000	242	0.00949936	0.0273976
26.402	26.1002	26.1181	26.473	26.1803	25.8597	26.4246	26.1045	26.3472	26.4077	26.3544	26.6046	25.7024	26.4499	26.182	26.2314	26.1712	26.2877	26.128	25.7125	26.4761	25.9818	26.1376	27.1316	26.1132	27.0612	26.2116	26.5743	25.1594	25.2452	25.9621	26.0423	26.1976				+	8	8	8	28.3	28.3	28.3	44.182	0	35.6	13711000000	231	0.003665	0.0125812
30.2078	30.0914	29.8083	30.1702	30.0444	30.2179	30.1932	30.2841	29.8636	30.3786	30.2655	30.1226	30.0596	30.2995	30.1252	30.0946	30.3692	30.1793	29.9917	30.83	29.8108	30.4016	30.5501	30.0223	30.4061	30.2584	30.2313	30.1072	29.5831	29.8685	29.907	29.9397	29.4413				+	24	24	24	66.6	66.6	66.6	49.526	0	323.31	213340000000	2301	0.00216143	0.00868085
27.5568	27.7577	27.6436	27.7863	27.6029	27.6034	27.8389	27.9022	27.5249	27.9959	28.0852	27.8714	27.6553	27.7468	27.7287	27.6571	27.9441	27.7033	27.5673	27.4116	27.9258	27.6801	27.8806	28.4746	27.5378	27.9046	27.8338	27.3463	27.1674	27.2724	27.6273	27.1923	27.055				+	17	17	17	83.5	83.5	83.5	27.249	0	150.96	41335000000	631	0.00125765	0.00664789
27.1123	26.6584	26.0392	26.5863	26.8686	26.4817	26.3978	26.9285	26.7257	26.8304	26.7304	27.1003	26.9473	26.9769	26.7983	26.6465	26.6453	26.8375	26.6039	27.5576	26.4976	26.9873	26.8677	27.1789	26.3882	26.5059	26.7915	26.795	25.9326	26.6288	26.7048	26.3109	25.546				+	13	13	10	49.3	49.3	43.3	39.472	0	174.49	19359000000	243	0.00881643	0.0256398
27.2007	26.789	26.7089	26.3915	26.9214	26.4242	26.7152	26.3594	26.6558	26.8925	27.1583	27.1641	26.4023	26.8683	26.7184	26.9141	26.7366	26.7037	26.5812	26.2433	26.7214	27.1141	26.9407	25.6607	26.871	26.4087	26.6523	26.3499	25.664	25.201	26.5457	26.3388	26.2908				+	8	8	8	43.6	43.6	43.6	31.363	0	100.26	17972000000	223	0.00351765	0.0122783
26.4164	26.814	25.852	26.4091	27.4754	25.4535	27.341	24.1471	25.9759	26.4838	26.5413	27.5569	27.1867	27.5921	27.8254	27.1892	26.5802	26.7793	26.5422	27.4308	27.0244	26.7813	25.669	25.7429	26.1048	26.923	26.767	25.8257	25.3503	26.7933	27.2628	26.2791	26.4645				+	10	10	10	55.2	55.2	55.2	28.299	0	86.539	20685000000	425	0.0187039	0.0455204
28.5863	28.0742	27.9976	28.5224	28.8295	28.8082	27.2478	26.5158	28.5919	29.0334	28.1627	28.2657	27.4619	28.1095	27.8491	28.1936	28.4195	28.6585	28.1858	25.7633	28.3036	28.2027	28.7343	27.2835	28.4269	28.019	28.3621	28.5574	26.5094	27.8443	24.7948	27.6227	25.458				+	6	6	6	52.8	52.8	52.8	12.097	0	140.46	57898000000	583	0.00292784	0.0107407
34.8683	34.9722	34.199	34.6498	35.4741	34.008	34.9041	33.9503	34.6615	34.6204	34.603	35.1906	35.186	35.6008	35.7245	35.2587	35.1259	34.8412	34.7515	34.4657	35.1527	35.1304	34.3445	34.2024	34.5664	34.2145	35.2026	34.7442	33.4866	33.4631	35.3906	34.2886	34.4785				+	14	14	2	95.1	95.1	7.7	15.328	0	323.31	5090500000000	22776	0.00670228	0.0207448
28.4558	28.7571	28.8825	28.7432	28.6756	28.5783	28.6806	28.788	28.7864	28.7209	28.8183	29.0367	28.4974	29.0022	28.8236	28.597	28.8527	28.8481	28.8465	28.7862	27.9024	28.9672	29.1674	28.9627	28.6437	29.3677	28.5325	28.6994	28.2977	27.8666	28.6603	28.7374	28.1858				+	32	32	1	43.6	43.6	1.3	96.717	0	323.31	81838000000	1336	0.0212008	0.0487149
29.0623	28.6786	28.8324	28.8284	28.5336	28.5985	28.6103	29.1635	28.7046	28.5818	28.7492	28.7645	28.7273	28.6242	28.5549	28.7309	28.4885	28.5554	28.1934	28.1336	28.6636	28.5704	28.8375	29.4093	28.5288	28.4866	28.7192	28.5156	28.3945	28.0215	28.7118	28.2254	28.3681				+	19	19	19	57.5	57.5	57.5	56.203	0	253.78	80585000000	962	0.0132904	0.0346943
27.6249	27.558	27.5074	27.9143	27.5088	27.8938	27.3388	27.1429	27.4549	27.6244	27.7678	27.2957	26.8843	27.5891	27.6255	27.3844	27.696	27.4246	27.094	26.4445	27.2499	27.5474	27.9684	28.8989	27.4456	27.6761	27.596	27.3135	26.6611	27.888	27.3814	26.9064	25.9032				+	14	14	14	35	35	35	58.802	0	90.724	35788000000	487	0.0144985	0.0360388
28.1301	28.2059	28.2845	28.26	28.3806	28.1741	28.2561	26.8781	28.1029	28.539	28.4679	28.3853	28.2802	28.5536	28.0248	28.3111	28.3786	28.2778	28.317	28.0866	28.631	28.6777	28.5654	27.8989	28.4194	28.2354	28.6066	28.4243	27.4745	26.2617	28.1759	28.0069	27.6402				+	8	8	8	51.1	51.1	51.1	20.535	0	90.329	60052000000	646	0.00468286	0.0147481
27.8495	27.5247	27.8604	27.7314	27.6172	27.2383	28.1096	27.4565	27.5322	27.9976	28.0075	27.8536	27.2528	27.9474	27.469	27.576	27.9909	27.6615	27.4966	27.4624	28.051	27.9314	27.9313	27.991	27.4396	27.8474	27.5543	27.4719	27.3183	26.9918	27.4933	27.2785	26.8059				+	15	15	15	60.6	60.6	60.6	31.424	0	127.38	37976000000	483	0.0035275	0.0122069
25.6638	26.2648	26.1928	25.8388	25.8238	25.86	26.1508	26.0075	26.1287	25.6778	25.951	25.8678	26.2803	25.4143	25.8905	26.2431	25.538	25.8397	25.9624	25.1622	26.0159	25.9641	25.4956	25.6555	25.9386	25.731	26.1127	25.1242	26.3009	25.6569	26.2471	26.4469	26.7515				+	5	5	5	74	74	74	12.259	0	39.788	10994000000	141	0.0208349	0.048887
28.2008	28.0234	27.8027	28.0022	27.7901	27.8507	27.8488	27.0804	27.7083	27.6835	27.5931	27.731	27.6123	27.8266	27.7087	27.8194	27.5441	27.5435	27.5235	26.9338	27.6174	27.6533	27.9306	27.6555	27.8042	27.7339	27.7029	27.4794	27.0615	27.6715	27.6867	27.1406	27.0267				+	8	8	8	90.3	90.3	90.3	12.651	0	79.51	37024000000	325	0.0186721	0.0456364
28.5802	28.5045	28.3567	28.5909	28.1536	28.2041	28.6242	28.4587	28.4279	28.5555	28.6756	28.5633	27.9688	28.6053	28.3771	28.3887	28.5699	28.4335	27.9293	27.5113	28.5683	28.62	28.6594	29.4706	28.335	29.009	28.3839	28.1454	27.9915	27.6213	28.2063	27.9181	27.8249				+	11	11	11	73.2	73.2	73.2	19.667	0	232.74	62523000000	689	0.00411325	0.0137236
30.9861	30.9438	30.7765	30.7794	30.8966	30.9881	30.6109	30.3812	30.8398	30.5591	30.3742	30.5819	30.7419	30.3998	30.62	30.9471	30.9844	30.7458	30.7912	31.1876	30.4905	30.6761	30.9462	31.135	30.9734	31.1251	30.6008	30.7971	30.359	30.7191	30.6614	30.4435	30.2227				+	32	8	8	84	18.7	18.7	49.585	0	323.31	318460000000	2731	0.0217833	0.0493724
27.6239	27.7927	27.9455	27.5883	27.3	27.6451	27.7765	27.3433	27.9128	27.161	27.4633	27.563	27.0418	27.5587	27.0899	27.6466	27.531	27.3682	27.3622	27.3498	27.0337	27.3359	27.5874	28.1626	27.4241	27.5389	27.3336	27.6753	27.0765	27.029	27.6037	27.0209	27.2192				+	7	7	7	58.7	58.7	58.7	24.675	0	204.49	36076000000	410	0.00969803	0.0275976
28.2614	27.8025	27.9596	28.0549	28.1679	27.5117	28.112	27.5438	28.1226	28.145	28.3333	27.9014	27.682	28.2811	27.6833	27.9254	28.3248	28.1058	28.0592	27.3675	28.1849	28.3012	28.6095	29.4405	28.115	28.1175	28.1103	28.3459	27.3205	26.8938	27.9371	27.8575	27.2336				+	14	14	11	69.3	69.3	56.8	27.669	0	91.908	51961000000	717	0.00108382	0.00605882
25.9318	26.5112	26.6987	26.7282	26.4267	25.7854	25.9492	26.0151	26.6453	26.2201	26.2297	26.0456	27.301	26.174	27.0484	26.8096	25.4626	26.3299	26.8287	27.217	26.45	25.6744	25.0272	27.8834	26.494	25.6833	26.3143	26.3646	27.7277	25.8453	27.0737	28.9144	28.2524				+	13	13	13	91.3	91.3	91.3	15.043	0	149.29	22153000000	874	0.0154218	0.0376415
30.782	30.602	30.5699	30.6351	30.6322	30.5102	30.6948	30.8021	30.5745	30.6847	30.709	30.8259	30.6304	30.7563	30.6427	30.7335	30.8994	30.7138	30.6057	30.4589	30.6799	30.6774	30.8458	31.6181	30.8579	30.8553	30.6359	30.6974	30.3637	30.6978	30.6137	30.3323	30.2988				+	43	43	40	72.5	72.5	67.8	85.719	0	323.31	340750000000	4157	0.0031041	0.0114862
26.9515	26.4233	26.4812	26.3217	26.6264	26.492	26.5425	26.3883	26.6903	26.4194	26.2139	26.5051	25.8333	26.3276	26.2495	26.4561	27.1577	26.5445	26.7223	24.5608	26.4524	26.5124	26.5025	27.2219	26.3705	26.8764	26.6301	26.8942	25.2777	24.417	26.4558	25.808	25.4078				+	5	5	4	31.4	31.4	28.1	23.381	0	51.829	18652000000	253	0.00160077	0.00696471
28.6201	28.9442	28.9432	28.8735	28.6029	28.726	28.8286	29.2367	28.5892	28.6169	28.5845	28.6459	28.657	28.6409	28.5377	28.7217	28.5213	28.3562	28.2801	28.0242	28.5559	28.3231	28.9887	30.026	28.8521	28.9292	28.7408	28.7273	28.1232	28.8018	28.7041	28.4174	28.2589				+	5	5	5	36.4	36.4	36.4	10.452	0	32.854	72570000000	971	0.00192098	0.008
27.804	28.1238	27.8536	27.502	27.8556	27.5281	28.0656	26.8517	27.9689	28.1041	28.0686	28.1326	27.9597	28.1317	28.1758	27.8908	27.876	27.7997	27.9428	28.1434	28.1502	28.1165	27.5331	27.1204	27.4017	27.7584	27.8274	27.4789	28.052	27.6242	27.9922	27.5926	27.4641				+	16	13	13	51.3	45.9	45.9	38.066	0	56.308	44184000000	364	0.00945934	0.0274667
30.1087	30.0673	30.0367	29.913	30.0653	30.1278	30.1761	30.239	30.0217	29.9063	29.8104	29.8853	29.9805	29.8413	29.6266	29.9758	30.3275	30.0501	30.0226	30.0747	29.8663	29.8774	30.124	30.6076	30.121	30.2405	30.0448	30.0318	29.6537	29.9261	29.8881	29.7093	29.7365				+	39	39	36	67.4	67.4	64.3	74.829	0	323.31	212710000000	2984	0.00173798	0.00740909
25.4093	25.5929	26.2402	25.6041	25.6408	25.7101	25.631	24.6464	26.1051	25.5904	25.8655	25.3227	26.0196	25.4253	26.2792	26.1863	25.5197	25.695	25.9992	26.1803	25.8181	25.6576	24.8769	23.7273	25.4654	24.6008	25.3662	24.6659	26.5624	24.7583	25.9974	26.5389	26.4912				+	16	16	16	12.3	12.3	12.3	180.09	0	81.814	9421500000	179	0.000606379	0.006
30.7062	30.4853	30.6591	30.6005	30.4804	30.321	30.5917	30.927	30.5666	30.4202	30.5269	30.729	30.2748	30.6969	30.4853	30.568	30.5917	30.6693	30.4262	30.8084	30.3882	30.5455	30.6319	31.5055	30.6476	30.8577	30.5059	30.4981	29.8705	29.8223	30.13	29.9822	29.9874				+	27	27	2	70.4	70.4	5	43.892	0	323.31	275950000000	2927	4.43423e-06	0
29.7417	29.5736	29.584	29.4262	29.6205	29.6848	29.5931	29.6046	29.9231	29.6102	29.4794	29.8819	29.7169	29.6178	29.4902	29.7959	29.7691	29.7241	29.6538	29.0187	29.9131	29.7716	28.3226	28.9598	29.2883	28.9355	29.8694	29.4901	29.4559	28.949	29.0787	29.6344	29.1384				+	27	23	23	35.4	31.5	31.5	102.59	0	83.906	162910000000	538	0.00279084	0.0103774
24.1654	25.1854	25.5053	24.8037	24.9246	25.3918	24.4611	24.3551	25.3012	24.7346	25.041	24.7601	26.1472	24.694	25.6398	25.7354	23.5735	25.0632	25.7101	25.2077	24.7218	24.9092	24.5591	26.4963	25.4635	24.5152	25.0531	24.6603	26.7506	24.4209	25.6267	27.6365	27.0486				+	7	7	7	33.4	33.4	33.4	35.82	0	110.39	7094300000	317	0.0135597	0.0348629
29.308	29.004	28.8737	28.9403	29.5436	29.2867	29.1178	29.3671	28.6831	29.4617	29.1142	29.2632	28.8683	29.331	29.0688	29.1354	29.3192	29.3964	28.7582	28.3757	29.1162	29.3201	29.621	29.8306	29.4866	29.2214	29.5746	29.8046	28.5515	29.3493	28.877	28.7188	28.7195				+	15	15	15	54	54	54	35.434	0	323.31	136580000000	2046	0.00106293	0.00597015
28.5303	28.0928	28.4655	28.6649	28.233	28.853	28.1428	27.18	28.5798	28.5108	28.3995	28.5258	28.1411	28.899	28.6937	28.66	28.4369	28.3495	28.6796	27.9477	28.5172	28.6232	28.7814	27.6407	28.309	27.8327	28.4777	28.2327	27.5733	25.8574	28.5752	28.0322	27.4952				+	20	20	7	40.5	40.5	12.5	58.565	0	141.76	66277000000	765	0.0113543	0.0303478
24.2626	24.4212	24.3886	24.1639	24.3808	24.51	23.6858	25.3134	24.4412	24.4579	24.2631	24.3619	24.6017	24.4287	24.2221	24.9421	24.351	24.4897	24.7522	25.4204	24.2172	24.3995	24.1331	22.7907	24.0156	24.3703	24.0939	24.1608	24.5203	24.5876	25.2602	25.1621	24.0181				+	10	10	6	7.7	7.7	5.3	175.09	0	33.563	3843200000	131	0.0212111	0.0485424
26.3002	26.3564	26.39	26.0638	25.6238	26.6878	26.0002	26.46	26.3977	26.0376	25.9154	26.2166	25.3069	25.6388	26.0511	26.2466	26.0345	25.9682	26.1264	26.7746	25.6416	25.4262	25.8833	24.1316	25.7291	25.4878	25.7236	25.9014	27.232	25.4083	26.1237	26.93	26.4963				+	7	7	7	28.6	28.6	28.6	26.434	0	53.971	11890000000	174	0.0132445	0.0346667
26.2582	26.117	26.304	26.0935	26.0233	25.9759	26.3367	27.3295	26.1925	25.924	26.1376	26.3905	25.3612	26.0418	25.0113	26.0825	25.5097	26.0472	25.4955	25.6758	25.8523	25.5501	26.2403	27.1064	25.6125	26.4519	25.6731	25.3851	25.301	25.5632	25.4815	25.65	25.3522				+	4	4	4	39.8	39.8	39.8	15.638	0	59.676	11645000000	477	0.00606392	0.0193913
28.4866	28.4827	28.307	28.3366	28.2178	28.2102	28.3324	28.3775	28.2239	28.2864	28.1893	28.5054	28.2392	28.2636	28.1903	28.1957	28.5067	28.2601	27.8001	28.3411	28.0243	28.2229	28.5582	27.8658	28.2956	28.9529	28.4972	28.4317	27.7667	28.1936	28.1859	27.6516	27.8101				+	13	13	13	48.4	48.4	48.4	38.666	0	183.2	60603000000	755	0.00408023	0.0136721
28.1003	27.6577	27.9585	27.7524	27.5471	27.5572	27.6993	27.3249	28.0945	27.5147	27.5522	27.9394	27.6143	27.7307	27.5318	27.6227	27.4842	27.8089	27.5501	26.8515	27.4741	28.0095	27.8953	26.6359	27.2712	27.6056	27.7008	27.6203	26.7172	26.5226	27.5393	27.087	26.5384				+	7	7	7	57.7	57.7	57.7	15.224	0	83.527	37629000000	469	0.000874417	0.00583051
26.8811	26.975	27.1047	27.0779	26.9272	27.0112	27.2652	26.9045	27.0591	26.6974	26.9652	27.2315	26.5296	27.2356	26.872	27.002	26.5547	27.017	26.7503	25.9832	26.8593	26.8401	26.7334	27.4138	26.5756	26.9888	26.74	26.2252	24.9696	26.7124	26.8081	26.3068	26.405				+	6	6	6	28	28	28	21.664	0	31.506	21848000000	319	0.014049	0.0357413
26.6798	26.5518	26.5584	26.853	26.5593	26.1985	26.9261	27.5401	26.4638	26.8072	26.3655	26.5989	26.4803	27.1221	26.7694	26.2617	26.5398	26.632	26.6012	26.4947	26.9353	26.5978	26.8935	25.9624	26.5109	26.1423	26.4502	26.5677	27.9835	26.8051	26.5097	27.654	28.1947				+	18	18	13	54.8	54.8	42.2	52.789	0	162.19	19555000000	250	0.00144283	0.00685714
28.0357	27.8996	27.7359	27.9596	28.1204	27.9489	27.9634	27.6829	28.0374	28.1439	28.0517	28.1922	27.5608	28.4062	27.7897	27.5619	28.2783	27.9271	28.0341	27.9779	27.9705	27.7728	27.8951	28.6222	27.641	27.7768	28.0865	28.0583	27.4633	27.0173	27.7592	27.4245	27.45				+	36	36	36	41.9	41.9	41.9	141.94	0	323.31	44180000000	590	0.00130312	0.00661111
28.7747	28.6921	28.914	28.9598	28.8105	28.8176	28.2898	28.0608	28.9578	28.8208	28.4043	28.7645	28.4218	28.707	28.8908	28.8739	28.7802	28.7972	28.7651	28.9539	28.3823	28.8751	28.9861	28.8323	28.9021	28.5671	28.8439	28.8594	27.8618	28.1743	28.8793	28.0786	27.775				+	15	15	15	55	55	55	40.653	0	323.31	73960000000	870	0.000980702	0.00593548
28.2451	28.0226	27.7834	27.9568	28.0696	27.316	27.4471	27.546	27.7707	28.0046	28.1764	28.0599	27.7805	27.941	28.6904	27.5231	27.7064	27.9995	27.6346	27.7567	28.0488	28.0395	28.1113	29.1793	27.4221	28.0434	28.2989	27.5761	27.1175	27.0484	27.5825	27.0555	27.1765				+	19	19	1	54.1	54.1	1.9	56.516	0	108	47751000000	522	0.00232726	0.00897959
29.9863	30.022	30.0237	29.8483	29.8683	29.9721	29.9012	30.0137	29.9878	29.731	29.9847	30.1757	29.9836	29.9232	29.8511	29.9174	29.8973	29.9698	29.894	30.7906	29.9686	29.8534	29.9935	30.0788	29.8928	30.1109	29.8673	29.9574	29.4617	29.569	29.8933	29.719	29.8079				+	22	22	21	60.5	60.5	60.5	37.297	0	323.31	176320000000	2182	0.0194332	0.0470493
32.3919	32.3212	32.3792	32.3707	32.3725	32.5095	32.6069	32.3283	32.4262	32.5567	32.5317	32.5365	32.39	32.6114	32.3229	32.3418	32.4561	32.405	32.3025	32.6174	32.7091	32.5797	32.507	32.7168	32.4263	32.6761	32.4042	32.3898	32.3455	32.1913	32.234	32.2047	32.2257				+	121	121	5	72.8	72.8	3.7	210.71	0	323.31	1079000000000	13234	0.00245203	0.00918812
26.6675	26.561	27.0199	27.2005	26.9923	27.2025	26.1858	25.7632	26.5115	27.6041	27.2382	26.1758	26.9666	27.0621	27.4338	26.9249	26.6488	26.746	26.9608	27.216	27.3054	27.4846	26.6528	26.8702	27.1428	26.2661	26.7782	26.6146	28.6664	26.3458	27.5023	28.0359	28.3366				+	31	5	0	51.1	8.1	0	92.72	0	74.567	27882000000	464	0.00881324	0.02575
26.8497	26.8527	27.1035	27.0582	26.751	26.5342	26.8151	26.8872	27.1828	27.1126	26.8263	26.9767	26.5348	27.1728	26.9166	26.6235	27.0818	26.8904	26.8497	27.6767	27.0934	27.1622	27.1525	26.3363	26.8633	26.4192	26.8257	26.8317	26.3576	26.5263	27.0015	26.3911	26.4702				+	21	21	21	27.5	27.5	27.5	104.75	0	71.487	22232000000	329	0.0202411	0.0480881
27.8497	27.5567	27.9443	27.8187	27.4163	27.6221	27.605	27.0313	27.7669	27.7837	27.5435	27.806	26.8865	27.7154	27.2463	27.4973	27.3562	27.6561	27.1084	28.2382	27.1026	27.4379	27.8502	26.2086	27.1109	27.5573	27.398	27.8173	26.7139	24.5632	27.4655	26.7145	26.314				+	6	6	6	62.8	62.8	62.8	15.064	0	47.231	31956000000	397	0.00153554	0.0068642
26.1281	25.8709	26.2378	25.7518	25.8825	25.8275	26.4085	25.3255	25.8809	26.3355	26.2643	25.8897	26.3391	26.2856	26.764	26.4367	25.6584	25.9193	26.4738	27.4595	26.6373	26.3032	26.0869	25.5612	25.8315	26.3749	26.0303	26.1244	27.2662	26.5028	25.8668	26.8403	27.1503				+	14	14	14	29.3	29.3	29.3	75.971	0	167.79	15127000000	290	0.0093987	0.027439
28.7231	28.7706	28.7142	28.7154	28.8256	28.7876	28.5017	28.7444	28.7331	28.6151	28.5864	28.6371	28.9719	28.696	28.779	28.6078	28.6994	28.7231	28.6977	27.7637	28.5898	28.6674	28.6003	29.729	28.8983	28.4681	28.6045	28.7806	27.7932	26.4757	28.841	28.2706	28.1152				+	11	11	11	46.7	46.7	46.7	31.903	0	265.34	78849000000	1101	0.00415953	0.013696
26.759	27.0174	26.5334	26.792	26.7902	26.6168	26.3866	25.0429	26.5709	26.6622	26.4386	26.4123	26.4368	26.4437	26.2392	26.4171	26.9824	26.6664	26.7861	27.5146	26.258	26.3556	26.7864	26.9076	26.6979	26.5591	26.6178	26.8882	25.8644	25.7626	26.6721	26.2328	24.3007				+	6	6	6	12.2	12.2	12.2	58.787	0	21.8	16790000000	177	0.0163296	0.0397963
28.286	28.1098	27.563	27.3296	28.1954	27.5961	28.2672	27.9246	28.2445	28.0947	26.6087	27.6089	27.9825	27.17	27.3511	27.7316	28.1857	28.2621	27.3342	27.0656	27.8969	28.1886	28.0986	28.0282	28.175	28.254	28.3036	28.0905	25.9115	27.78	27.9228	27.4446	24.3897				+	30	30	30	47.7	47.7	47.7	126.4	0	288.1	44002000000	597	0.00951984	0.0270952
28.4358	28.7533	28.84	28.37	28.5281	28.3397	28.6267	28.4093	28.5417	28.3766	28.2248	28.6535	28.606	28.4438	28.3447	28.5574	28.2904	28.3703	28.2611	28.9105	28.0974	28.1508	28.2876	28.395	28.2151	28.6897	28.1498	28.7237	27.8902	27.7675	28.5831	27.9409	28.0256				+	12	12	12	53	53	53	33.341	0	176.34	65012000000	574	0.0108597	0.0299661
30.7997	30.6688	30.2991	30.5307	30.5157	30.241	30.714	30.5422	30.1711	30.3777	30.4692	30.6229	30.4558	30.3928	30.397	30.4944	30.5075	30.5323	29.7527	29.8579	30.4352	30.0889	30.7583	31.286	30.2358	30.6851	30.5847	30.6046	30.0376	30.5373	30.3335	29.7299	30.2505				+	34	34	30	70.4	70.4	64.9	71.916	0	323.31	281160000000	4768	0.0181703	0.0443105
28.8361	28.7758	28.718	28.7093	28.4463	28.4211	28.926	28.5211	28.658	28.6544	28.5092	28.8527	28.3702	28.7654	28.5259	28.635	28.2764	28.574	28.2646	27.4977	28.5947	28.5225	28.8734	28.3387	28.2687	28.6536	28.4905	28.6963	27.8819	28.2128	28.5186	27.9736	28.0062				+	9	9	9	66.9	66.9	66.9	17.177	0	113.86	68778000000	691	0.00852813	0.0251465
33.4019	33.1407	32.8912	33.1992	33.3561	33.2399	33.2894	33.674	33.0436	33.2742	33.2995	33.2391	33.3598	33.2473	33.2722	33.2191	33.5637	33.3415	32.96	33.3084	33.3704	33.4135	33.6385	34.3675	33.6096	33.3711	33.4535	33.2388	33.2917	33.4064	33.0343	33.0185	33.3657				+	122	122	122	81.1	81.1	81.1	191.56	0	323.31	2183500000000	26524	0.0209111	0.0488485
26.1344	25.8528	26.1055	26.3673	25.8534	25.8008	25.8541	26.4205	25.9616	26.1775	26.3249	26.0524	26.3549	25.9818	26.3063	26.1938	25.7363	25.9705	26.6562	26.4824	26.2548	25.8854	25.6627	27.2832	25.8644	26.4569	25.7295	25.9354	27.3335	27.0122	26.5578	26.3463	27.1973				+	26	26	25	28.3	28.3	27.5	133.52	0	160.6	15177000000	595	0.00222836	0.00892632
29.9604	29.8908	29.8257	29.7765	29.8003	29.6529	29.9034	29.6741	29.8994	29.7871	29.7908	29.9964	29.8562	29.7224	29.7207	29.8408	29.7854	29.9027	29.9269	29.3647	29.7077	29.7993	29.9786	31.0233	29.8227	30.0233	29.9484	30.0979	29.5168	29.5382	29.8549	29.5309	29.7773				+	34	33	33	54.3	54.3	54.3	73.744	0	323.31	182580000000	2527	0.00423524	0.0137008
28.2359	28.2763	28.3138	27.9594	28.3612	28.0751	28.4097	28.0527	28.0148	28.1485	28.1822	28.2676	28.0809	28.0128	28.0807	28.2075	28.1997	28.213	28.112	28.6271	28.1153	27.9132	28.2511	29.4459	28.0698	28.3744	28.0923	28.2305	27.3876	27.6621	28.0224	27.6387	27.6763				+	12	12	12	49.5	49.5	49.5	30.495	0	96.214	53413000000	634	0.00105664	0.00606061
31.1304	30.9293	31.1725	31.1089	30.921	30.785	31.1486	30.8516	31.1767	31.1925	31.2531	31.2141	30.9145	31.39	31.1601	31.1138	31.1863	31.1151	31.0353	31.3261	31.2817	31.1336	31.1435	31.2142	30.7387	31.2429	31.0218	30.9616	30.8996	30.8943	31.0055	30.6545	30.9368				+	126	117	117	68.8	65.1	65.1	271.01	0	323.31	413720000000	6626	0.0135593	0.0350408
29.8554	29.5588	29.7523	29.8496	29.7493	29.7299	29.6622	29.9047	29.743	29.9238	29.69	29.6775	29.3432	29.8506	29.5424	29.5546	29.6085	29.6918	29.6646	29.9361	29.7719	29.9775	29.9073	28.8371	29.5318	29.61	29.6309	29.4946	29.0944	29.2139	29.3953	29.2893	28.8109				+	24	24	21	84.2	84.2	72.8	33.557	0	323.31	152570000000	1961	7.49662e-05	0.00164706
27.3001	26.8669	27.0098	27.1598	27.4931	27.2611	27.0994	25.9082	26.9472	27.7766	27.219	26.5474	27.3006	27.2814	27.2628	26.9419	27.3831	27.309	27.4903	25.7285	27.1938	27.753	27.7095	26.8743	27.41	27.1782	27.4025	27.3826	25.9007	23.6346	27.299	27.0274	25.8825				+	18	17	17	40.7	39.2	39.2	53.177	0	59.792	29063000000	380	0.0114082	0.0304
34.1662	34.2627	34.0111	34.0133	33.9862	33.8098	34.2008	34.5882	33.9832	33.9103	34.0073	34.2146	33.7952	34.0599	33.6791	33.9873	34.09	33.9793	33.8179	33.6472	34.0296	33.6331	34.2438	35.1783	33.9722	34.4856	34.1168	34.2321	33.6243	34.0875	33.8811	33.5565	33.7932				+	33	33	33	82.2	82.2	82.2	56.344	0	323.31	3322400000000	25098	0.00265438	0.00992157
29.3359	29.2626	29.2104	29.0601	29.0585	28.7732	28.9391	28.9879	29.0847	28.8446	29.0022	29.3302	29.0856	29.0312	28.9822	29.1856	29.1938	29.2807	28.8523	28.0006	29.0456	28.8237	29.3209	30.5144	29.1892	29.292	29.2018	29.2231	28.328	28.2688	29.0624	28.7704	28.7097				+	16	16	16	42.1	42.1	42.1	48.899	0	216.82	107920000000	1406	0.00413518	0.0136774
30.861	31.0346	31.0379	31.2651	30.9116	31.1182	30.9662	30.4245	30.6621	30.9183	30.9305	30.8944	30.8969	30.7981	30.6333	30.9715	30.6009	31.1871	30.2638	30.7464	30.8055	30.8529	31.197	31.0248	30.7151	30.6836	30.8366	30.7537	30.2501	30.3063	30.4751	30.5786	30.5656				+	21	21	21	70.2	70.2	70.2	39.531	0	323.31	326660000000	2918	0.00237443	0.00909091
27.4417	27.0747	26.8324	27.038	27.1657	27.0324	27.4126	26.9727	26.7044	27.4406	27.2611	27.3492	27.136	27.5584	27.1038	27.3166	26.9666	27.323	26.506	27.0957	27.3192	27.1194	27.0711	26.6216	27.1407	26.9743	27.1562	27.0148	26.7093	26.5328	26.9559	26.8573	26.2712				+	9	9	9	34.6	34.6	34.6	28.559	0	120.1	24988000000	283	0.00626575	0.0198298
29.681	29.8119	28.1243	27.8892	29.0353	28.2675	28.9666	28.0821	29.8691	29.2307	29.9966	30.0682	29.6101	29.0647	30.5607	29.5798	28.7534	29.6265	29.9802	29.8642	30.0156	29.6838	29.2454	26.6212	27.9338	29.301	30.0014	27.8069	28.6819	26.6151	29.4622	27.8185	29.1682				+	35	34	29	76	74	64.4	53.7	0	267.26	108930000000	948	0.0156903	0.038243
29.4994	29.3925	29.2584	29.2419	29.455	29.1606	29.1862	29.649	29.3791	29.3722	29.3112	29.3107	29.4983	29.4935	29.4199	29.4698	29.6295	29.5415	29.4027	28.7278	29.4053	29.5228	29.5368	30.5216	29.5699	29.148	29.5799	29.5253	29.0102	28.5761	29.4598	28.9832	28.88				+	25	25	25	34.8	34.8	34.8	96	0	323.31	124730000000	1678	0.00488294	0.0150519
28.6298	28.5835	28.5732	28.3459	28.6451	27.9657	28.5562	28.5131	28.5086	28.3262	28.6502	28.4839	28.3352	28.3473	28.029	28.5757	28.1265	28.5445	27.8234	29.2567	28.3155	28.1022	28.8084	28.5702	28.4581	28.4077	28.2724	27.8994	27.3208	28.4141	27.992	27.8136	27.7096				+	5	5	5	81.3	81.3	81.3	8.3047	0	131.04	62445000000	684	0.00814118	0.0246275
33.0493	33.0123	32.7306	32.8685	32.9265	32.7593	32.9425	32.9685	32.9259	32.9849	32.9444	32.8561	32.646	32.9005	32.6795	32.7529	33.0819	32.8216	32.8546	32.427	32.9721	32.8578	33.1431	34.1056	32.9143	32.9352	33.0329	33.0696	32.4779	32.6239	32.8298	32.5128	32.3724				+	31	31	26	77.2	77.2	63.8	47.127	0	323.31	1520200000000	14744	0.000749221	0.00548148
27.3756	27.0875	27.3961	27.0924	27.4165	27.6253	26.2152	25.2717	27.792	27.2216	26.741	27.4386	26.9226	27.0914	26.9296	27.0102	27.3251	27.5759	27.5371	27.0197	26.6733	27.4994	27.5856	27.642	27.3618	26.5774	27.0732	28.1097	24.8107	24.9162	27.2069	26.6405	25.0242				+	6	6	6	69.9	69.9	69.9	11.413	0	80.691	28712000000	381	0.00090346	0.00593333
29.6061	29.5115	29.4139	29.2544	29.6409	29.6893	29.295	29.7159	29.6091	29.3444	29.3285	29.3106	29.5099	29.4315	29.2388	29.3096	29.8299	29.4975	29.6456	30.1495	29.3836	29.5394	29.5805	30.3069	29.6996	29.1289	29.5864	29.777	29.0551	29.3149	29.3148	29.1687	29.0871				+	29	27	27	59.7	58.2	58.2	64.532	0	323.31	150800000000	2455	0.0214186	0.0488945
30.3455	30.5536	30.1323	30.3186	30.3896	30.3278	30.5076	30.4196	30.2561	30.4035	30.3278	30.3484	30.3022	30.1469	30.3458	30.2413	30.6118	30.2344	30.3869	29.8982	30.5444	30.1884	30.4455	31.6512	30.4749	30.7236	30.4419	30.6427	30.0912	30.14	30.3772	29.984	29.9695				+	16	16	16	84.4	84.4	84.4	24.818	0	323.31	271530000000	2963	0.00146952	0.00683544
25.4885	26.2532	26.6281	26.7356	26.5167	26.8221	26.8407	26.3914	26.2949	26.5146	26.3206	25.9879	26.2916	26.106	26.7016	26.4481	24.7472	26.3348	25.5849	26.9608	26.6154	26.5505	25.9318	24.0125	25.71	25.9408	25.7507	25.9627	25.6896	25.4968	26.249	26.0856	25.4555				+	11	11	11	26.9	26.9	26.9	57.407	0	61.977	13084000000	173	0.0150077	0.0369569
29.3027	29.0055	29.215	29.2404	29.2591	29.2901	29.0493	28.8759	29.3407	29.2873	29.2181	29.2372	29.0342	29.1486	28.8849	28.9829	29.3798	29.1758	29.2037	28.32	29.2151	29.1404	29.1422	29.598	29.1211	29.4568	29.2331	29.4186	28.7999	27.7814	29.0028	29.0247	28.4007				+	35	35	35	59.5	59.5	59.5	62.569	0	323.31	109730000000	1451	0.00113344	0.00617143
29.4662	29.2471	29.2452	29.2156	29.475	29.2431	29.2532	28.6676	29.1971	29.3762	29.4822	29.5717	29.3486	29.441	29.2271	29.3552	29.5425	29.4992	29.2514	28.8606	29.3274	29.4471	29.5397	30.5093	29.6735	29.4009	29.4377	29.5073	29.0116	29.2703	29.2618	29.2178	29.21				+	46	46	42	72.1	72.1	66.5	94.055	0	323.31	146550000000	1976	0.0100358	0.028093
32.893	32.8078	33.0237	32.7918	32.8473	32.4733	32.8979	33.035	32.5397	32.693	32.5447	32.8036	32.6569	32.7	32.6031	32.7663	32.9804	32.8807	32.5564	32.6313	32.7672	32.6644	32.798	33.1103	32.9212	32.7923	32.8576	32.8625	32.3011	32.3667	32.8283	32.3045	32.4845				+	32	32	32	76.5	76.5	76.5	47.314	0	323.31	1327400000000	8980	0.00142299	0.00673684
34.2911	34.26	33.2093	34.3585	35.3065	33.964	34.9266	33.6205	34.0362	34.4298	34.1123	35.056	35.0088	35.2655	35.2945	34.8958	34.8331	34.4935	34.6327	33.5157	34.7872	34.9215	34.3879	33.9652	34.4722	34.3801	34.8373	33.4399	32.6092	32.8101	34.846	33.8523	33.7216				+	17	17	4	95.2	95.2	34.7	15.979	0	323.31	4197600000000	17987	0.00530053	0.0164088
31.4462	31.4982	31.3803	31.1496	31.1605	31.0143	31.0102	31.2312	31.6928	30.9557	31.3788	31.4068	31.6062	31.2361	31.2835	31.0968	31.1908	31.1056	31.4266	31.4231	30.9521	30.9263	31.3445	32.2373	30.9237	30.9621	31.3311	31.3264	29.5368	30.5532	31.4901	30.8935	29.599				+	8	8	0	63.1	63.1	0	14.077	0	251.17	466500000000	3092	0.00215285	0.00864516
29.4255	29.1876	29.2765	29.1851	29.1939	29.2361	29.5994	29.2074	29.1883	29.4989	29.468	29.2977	29.2554	29.3354	29.2895	29.2189	29.2137	29.3319	29.028	29.9589	29.4967	29.2193	29.4947	29.2198	29.1667	29.5781	29.2455	28.9978	28.9192	28.9261	28.986	28.7039	28.617				+	20	18	4	65.4	58.9	12.4	40.499	0	323.31	120590000000	1468	0.00030879	0.00464516
32.1045	32.0259	31.9872	32.2042	31.961	31.9778	32.0959	31.9818	32.0273	32.123	32.102	32.0827	31.8604	32.1448	31.9747	32.0189	32.1428	32.0586	31.8218	31.9471	31.9365	32.1126	32.195	32.5437	32.0549	32.1377	31.9295	31.9404	31.7187	31.723	31.9967	31.8081	31.5608				+	64	64	18	69	69	14.8	102.41	0	323.31	766010000000	9488	0.000708081	0.0056
31.7688	31.9095	31.7244	31.8231	31.7993	31.8296	31.7066	32.1028	31.7235	31.3517	31.5982	31.7799	31.8211	31.6585	31.7211	31.5525	31.8707	31.8691	31.6598	31.1282	30.9832	31.4548	32.0535	32.684	31.8085	31.8667	31.6167	31.9429	31.3454	31.1998	31.6573	31.402	31.615				+	63	44	43	63.9	45.8	45.1	113.05	0	323.31	656170000000	6372	0.00763781	0.0236242
32.7469	32.8447	32.6975	32.9607	32.8145	33.0523	32.6021	32.6865	32.9391	32.8012	32.6545	32.6553	32.8642	32.6727	32.7234	32.6975	32.8292	32.7622	32.7334	33.1564	32.5658	32.6917	32.9019	32.6892	32.7914	32.3775	32.6319	32.7485	32.4578	32.5286	32.7651	32.4737	32.4393				+	60	39	39	66.9	46.5	46.5	111.69	0	323.31	1333800000000	12573	0.0195084	0.0468089
32.3155	32.2351	32.145	32.0982	32.1239	32.1279	31.6937	32.363	32.1863	31.9001	32.0525	32.035	31.9632	32.1946	31.7996	31.8963	32.3805	32.2095	32.0061	32.1637	31.8563	32.1726	32.2303	32.9994	32.1352	31.8915	32.0924	32.3283	31.53	31.8215	32.1478	31.6923	31.5263				+	22	19	17	76.3	63.6	58.8	47.14	0	323.31	901720000000	8486	0.00811092	0.0248212
33.7066	33.5868	33.4044	33.3783	33.5666	33.4248	33.5007	33.9961	33.6831	33.1393	33.1518	33.5341	33.4507	33.3727	33.277	33.3817	33.8126	33.5154	33.5297	33.3539	33.2591	33.3774	33.807	34.811	33.6505	33.7277	33.5729	33.8503	33.1481	33.8321	33.3188	33.0436	33.4402				+	28	28	26	87.7	87.7	85.6	42.725	0	323.31	2342400000000	23672	0.00951202	0.0272335
32.857	32.9453	32.8804	32.8303	33.0257	32.7403	32.5489	32.7073	32.8056	32.8724	32.6171	32.8603	32.7595	32.7842	32.4695	32.85	32.8109	32.9528	32.7755	32.6054	32.4938	32.5928	33.0766	33.2232	32.9191	32.7387	32.8909	33.222	31.9622	32.5864	32.7791	32.4491	32.2613				+	18	18	18	47	47	47	35.201	0	323.31	1214400000000	6300	0.000133705	0.00233333
28.2463	27.9732	28.2449	28.0869	27.8464	27.9978	28.1251	27.9657	28.1799	27.8642	28.1768	28.0696	27.9655	27.9533	28.0043	28.0324	28.3194	28.0247	28.2671	28.2424	28.1002	28.3645	28.1211	27.8218	27.7523	27.8501	27.9718	28.0651	27.8544	27.6986	27.9055	27.8438	27.7964				+	7	7	7	47.4	47.4	47.4	14.775	0	67.219	51276000000	393	0.00145408	0.00682051
30.8746	30.8523	30.9326	30.8921	30.952	31.1409	30.4043	29.9505	31.2759	31.0337	30.888	30.8799	30.6294	30.8397	31.0201	30.731	30.8163	30.8853	31.1948	30.2357	30.9244	31.083	30.9043	30.6034	30.727	30.4259	30.673	31.2922	29.378	29.2771	30.9035	30.4954	29.4657				+	9	9	9	59.9	59.9	59.9	15.709	0	131.27	314510000000	2227	0.000716262	0.00528302
30.7664	31.0785	31.0225	31.3027	30.9086	30.7422	31.1157	32.1103	30.9022	31.253	31.0767	31.0553	30.7073	31.2263	31.101	30.9765	31.0099	30.9181	30.7577	31.6487	30.9091	31.1536	30.9119	31.0492	31.0066	31.4084	30.8595	30.5715	30.5394	29.5474	30.8448	30.8423	30.1087				+	11	11	11	46.6	46.6	46.6	33.31	0	295.16	381950000000	2180	0.00441751	0.0141395
28.9475	28.8411	28.8151	28.5482	28.497	28.5698	28.7923	28.6074	28.9765	28.5259	28.8816	28.9719	28.6227	28.837	28.5606	28.6323	28.5813	28.6518	28.6412	28.39	28.7343	28.674	28.8941	28.7838	28.5886	29.2037	28.5217	29.0495	28.6034	27.975	28.55	28.527	28.4902				+	10	10	10	38	38	38	25.117	0	55.611	79700000000	904	0.014797	0.0365769
31.0155	30.8737	30.8377	30.986	30.8103	30.7016	30.8673	30.6772	30.8596	30.7938	30.9304	30.9041	30.7906	30.9363	30.7628	30.7906	31.0084	30.9293	30.6813	30.072	31.0263	30.8166	30.9843	31.8973	30.9642	30.9686	30.9561	30.9485	30.1499	30.8861	30.8088	30.2655	30.3726				+	24	24	24	49.1	49.1	49.1	67.165	0	323.31	371290000000	3960	0.00479113	0.0148358
31.8488	31.7226	31.6998	31.3784	31.4382	31.1661	31.3508	31.0852	31.5851	31.2893	31.3384	31.7402	31.4821	31.4302	31.4392	31.4717	31.3659	31.6247	31.3069	31.8313	31.3883	31.4607	31.6551	31.3801	31.4956	31.3908	31.4991	31.9197	30.4782	31.0466	31.5206	31.0778	31.0272				+	35	29	29	90.9	76.3	76.3	39.283	0	323.31	534960000000	5991	0.00314646	0.0113571
31.5654	31.5378	31.1871	31.4006	31.5334	31.4028	31.1657	31.1035	31.2649	31.1691	31.1958	31.3503	31.4629	31.2372	31.3282	31.4063	31.6808	31.5629	31.043	30.1728	31.1064	31.2618	31.8319	32.1129	31.8381	31.2549	31.5954	31.7467	30.6459	30.7215	31.3956	30.8886	30.9798				+	23	23	23	67.6	67.6	67.6	42.267	0	323.31	514370000000	4030	0.00133979	0.00648649
33.2044	33.0044	33.1015	33.1727	33.0725	32.9902	33.1115	32.93	33.0169	33.0965	32.9861	33.3039	33.0427	33.3883	33.2961	33.1629	33.1277	33.0821	32.9775	33.4609	33.2355	33.2591	33.3111	33.2833	33.114	33.3814	33.2822	33.1683	32.5108	32.9097	33.0217	32.8098	32.7053				+	49	49	45	84.2	84.2	83	73.987	0	323.31	1677700000000	17033	3.98805e-06	0
32.7545	33.0215	33.2369	33.1051	33.01	33.1685	32.7986	32.5993	33.265	33.0363	33.063	33.1414	33.0341	32.9914	32.9487	32.9097	33.0524	32.8722	33.373	32.0714	32.8884	32.9807	33.2296	34.2199	33.107	32.7561	33.1435	33.1543	32.0881	31.7218	32.971	33.0712	32.2437				+	16	16	16	91.9	91.9	91.9	16.837	0	323.31	1367000000000	5603	0.00695437	0.0216054
32.6417	32.548	32.349	32.3719	32.4359	32.3114	32.292	32.1646	32.4499	32.3468	32.4419	32.4768	32.2073	32.5085	32.1089	32.2675	32.8036	32.4379	32.2972	31.1867	32.224	32.3798	32.7376	33.5101	32.3201	32.214	32.6106	32.6314	31.5576	31.6256	32.2776	31.9453	31.7584				+	12	12	12	70.7	70.7	70.7	17.874	0	323.31	1054800000000	6866	0.00228478	0.00894845
28.4373	28.2721	28.0007	28.2712	28.2077	27.8457	27.8906	28.6452	27.9175	28.1123	28.2933	28.3238	28.233	28.1296	28.053	28.2389	28.3865	27.9937	28.0297	28.8127	28.2716	28.6393	28.3297	28.353	28.377	28.1563	28.0834	28.5748	27.7371	27.3328	28.3611	27.7764	27.9721				+	24	24	24	62.7	62.7	62.7	47.538	0	163.41	57112000000	648	0.0171511	0.0420367
31.0934	31.161	31.1514	30.9423	30.9833	30.6625	31.0494	31.2448	31.138	30.7705	30.8459	31.2743	30.6716	31.1897	30.7672	30.9828	30.3018	30.9867	30.8412	29.3529	30.7311	30.5806	30.7561	30.7883	30.545	30.9924	30.6689	31.0134	30.0235	30.0233	30.901	30.3982	30.3883				+	14	14	14	59.2	59.2	59.2	19.514	0	71.536	299730000000	2317	0.0169706	0.0417696
29.7622	29.8967	29.5067	29.176	29.9995	29.6866	29.7831	28.6558	29.3991	28.944	28.9562	29.4986	29.3866	28.9577	28.6369	29.3509	29.7092	29.5448	29.24	28.5657	29.03	29.2514	29.1404	30.0258	29.7879	29.6485	29.3873	29.6991	28.61	28.4255	29.3219	28.8424	28.7661				+	13	13	13	75.9	75.9	75.9	25.552	0	323.31	137360000000	1163	0.00658112	0.0205278
28.5388	29.7579	29.8084	29.8086	29.2882	29.7974	29.4172	29.5906	29.6319	29.5025	29.4223	29.2703	29.4232	29.0813	29.469	29.3647	29.3031	29.242	29.2686	29.1924	28.4736	29.4682	29.6235	30.1642	29.1646	29.9379	29.0618	29.1789	28.5787	28.9328	29.2709	29.3554	28.2391				+	36	36	31	40.2	40.2	34.2	114.77	0	323.31	113920000000	1737	0.0162552	0.0398884
33.2861	33.2149	33.0203	33.2225	33.1775	33.134	33.3998	33.4629	32.9624	33.126	33.1928	33.247	33.12	33.2365	32.9563	33.1358	33.4665	33.1974	32.9711	32.6703	33.1342	33.1798	33.3745	34.3044	33.3857	33.3266	33.2352	33.3743	33.0709	33.2269	33.0255	32.8832	32.8492				+	50	50	9	82.9	82.9	15.8	57.817	0	323.31	1941000000000	16647	0.00616504	0.0195429
26.6521	26.8413	27.2396	27.2752	26.9683	27.3844	26.9923	26.3219	27.0905	27.2894	26.997	26.9093	27.3109	26.9109	26.9413	27.1638	26.5785	26.7525	26.7374	25.3448	27.1891	26.7665	26.7714	26.3949	27.0548	27.7967	26.9133	27.0033	28.7643	27.502	26.8218	27.8947	27.5697				+	10	10	10	39.4	39.4	39.4	27.804	0	76.181	26175000000	337	0.0128961	0.0339158
33.5794	33.5292	33.3447	33.4373	33.4354	33.2683	33.406	33.4348	33.3792	33.4121	33.4173	33.333	33.2657	33.4105	33.2316	33.4342	33.5112	33.5225	33.0521	32.8215	33.3142	33.324	33.7373	34.3443	33.4141	33.1889	33.4063	33.5434	32.9774	33.0717	33.3763	33.0804	33.0251				+	44	44	44	72.9	72.9	72.9	59.753	0	323.31	2076000000000	16036	0.00473199	0.0148182
28.831	28.6355	28.7272	28.8172	28.7303	28.7614	28.4706	28.2186	28.6989	28.7834	28.7305	28.7446	28.3327	28.6417	28.3031	28.4727	28.9792	28.7445	28.6098	28.4241	28.5192	28.6413	28.8722	28.8365	28.9137	28.3753	28.6585	29.0469	26.8023	27.0571	28.4403	28.0491	27.5943				+	18	18	16	69	69	62.7	31.907	0	113.79	72999000000	668	1.34504e-06	0
32.2073	32.0149	31.9885	32.0711	32.2612	31.7338	32.1064	32.3641	31.9373	32.1716	32.0084	32.232	31.943	32.2322	31.8598	32.0451	32.2106	32.178	32.061	31.5353	31.9848	32.0164	32.2729	33.1935	32.2219	32.274	32.1972	32.1714	31.3907	31.8629	31.754	31.6154	31.3622				+	37	37	28	83.5	83.5	67.6	44.538	0	323.31	827540000000	6444	0.000122477	0.00236364
26.9604	26.9309	26.899	26.7623	27.1458	26.5019	26.7684	27.2281	26.7928	26.5876	26.9846	27.2643	27.019	27.3901	26.5745	26.7079	26.8729	26.9232	26.682	27.4572	26.9398	26.8948	27.1749	26.7569	26.8663	27.005	26.8477	26.9308	24.8297	26.6244	26.3771	26.5644	24.3751				+	19	19	19	57.1	57.1	57.1	50.87	0	44.795	20770000000	250	0.000156008	0.00272
29.683	29.3032	29.5382	29.4696	29.6274	29.41	29.5017	29.3017	29.3565	29.551	29.6882	29.714	29.4773	29.7725	29.52	29.4979	29.5673	29.8352	29.6166	29.8472	29.5492	29.7917	29.562	29.559	29.6412	29.6005	29.6925	29.7791	29.6212	28.8173	29.4134	29.317	29.4357				+	22	22	22	73.3	73.3	73.3	47.995	0	323.31	151830000000	1972	0.00372725	0.012678
26.5889	26.4942	26.4962	26.6289	26.3712	26.5203	26.5842	28.4669	26.6274	26.5631	26.7589	26.4545	26.3926	26.6911	26.6195	26.6737	26.2287	26.3567	26.2608	28.0947	26.5828	26.5455	26.5728	25.2363	26.3455	25.6705	26.2075	26.4308	27.2732	26.6344	26.7411	27.6285	27.3145				+	15	15	15	76	76	76	29.517	0	100.19	21767000000	256	0.0209155	0.0486379
28.7923	28.728	28.611	28.9528	28.7857	29.1368	29.1097	28.2563	28.9485	28.5136	28.6161	28.786	28.8807	28.7078	28.7143	28.9324	28.6365	28.7226	29.1265	27.94	28.8754	28.4131	28.7842	28.1668	28.643	28.6262	28.3471	28.3224	27.4224	28.2515	28.5359	28.0676	28.356				+	8	8	8	50.9	50.9	50.9	12.494	0	290	79994000000	730	0.00289742	0.0107664
32.5245	32.5423	32.4665	32.5823	32.5135	32.404	32.4197	32.8472	32.5458	32.4022	32.4691	32.6218	32.4462	32.6782	32.4484	32.5432	32.5725	32.4849	32.2478	32.5323	32.4146	32.4144	32.8776	33.3983	32.4619	32.659	32.5683	32.5593	32.1583	32.0682	32.4457	32.073	32.1698				+	71	71	58	80.7	80.7	68.5	97.294	0	323.31	1112500000000	13555	0.000268061	0.00386207
31.6891	31.5296	31.381	31.5623	31.5859	31.3353	31.369	31.4899	31.5093	31.578	31.587	31.5692	31.3562	31.7381	31.4045	31.3986	31.713	31.4955	31.3754	31.0491	31.513	31.3568	31.8835	32.5298	31.4198	31.2864	31.629	31.6857	30.7681	30.6918	31.2389	31.0416	30.936				+	25	25	17	58.7	58.7	44.7	47.398	0	323.31	571720000000	7360	5.40081e-05	0.00142857
27.7353	27.7709	27.7133	27.694	27.7826	27.9121	27.8414	27.5577	27.541	27.8282	27.6084	28.039	28.0008	27.734	27.6467	27.8527	28.0062	28.1866	27.6638	27.9454	27.64	28.1531	28.1406	29.1093	28.0148	27.7116	28.0754	28.2358	27.365	27.4218	27.8457	27.7012	27.6282				+	13	13	13	41.8	41.8	41.8	31.83	0	121.42	49449000000	773	0.00109592	0.00602899
31.7275	31.6018	31.6151	31.7037	31.4623	31.3461	31.2571	31.9198	31.6552	31.4477	31.4523	31.724	31.4822	31.5091	31.3138	31.469	31.6253	31.5021	31.5988	31.9006	31.3089	31.4604	31.6799	32.6994	31.5936	31.6307	31.625	31.9279	30.834	31.5687	31.5781	31.1294	30.8547				+	22	22	22	85.4	85.4	85.4	28.832	0	323.31	596250000000	6531	0.00388883	0.0131765
28.5389	28.29	28.7894	28.6587	28.532	28.4483	28.4048	28.4924	28.5553	28.8261	28.3271	28.3405	28.3631	28.7036	28.5096	28.4013	28.4099	28.8129	28.4855	29.0123	28.6062	28.5648	28.4627	28.9265	28.4707	28.8648	28.4174	28.4765	27.9578	28.0054	28.4191	28.1822	27.8852				+	26	26	26	63.8	63.8	63.8	60.359	0	302.79	72450000000	843	0.000530923	0.00574359
27.6898	28.5694	28.0318	28.2711	28.1503	28.3947	29.0145	28.8492	28.3268	28.114	28.587	28.4353	27.9819	28.3559	27.6182	28.3734	27.6956	28.2169	27.3301	26.5293	28.4305	27.6633	28.0211	28.3557	28.0917	28.9273	28.045	27.1517	27.1817	27.0399	27.0853	27.6188	26.6384				+	6	6	6	63.4	63.4	63.4	8.2545	0	36.989	60128000000	556	0.000662433	0.00573913
32.2327	32.1083	31.8479	31.8014	31.9797	31.8468	31.9886	32.1942	32.1843	31.8406	31.8956	32.1676	31.6755	31.9401	31.704	31.7347	32.2938	31.9414	31.9503	31.4704	31.8401	31.8686	32.243	33.3471	31.9934	32.2241	32.2198	32.2086	31.3675	31.4453	31.7673	31.1043	31.3096				+	18	18	18	95.2	95.2	95.2	20.801	0	323.31	760260000000	5454	3.40032e-05	0.000307692
30.2846	30.2669	30.2181	30.1618	30.2597	30.1178	30.2779	30.6268	29.9751	30.2318	30.0301	30.3132	30.4524	30.0879	30.1092	30.3611	30.0597	30.2556	29.9296	30.3865	30.3411	29.9795	30.2577	30.2154	30.1513	30.3949	30.2955	30.2384	29.9411	29.8316	29.9886	29.9844	29.9071				+	15	15	15	52.3	52.3	52.3	32.996	0	218.66	225460000000	3201	0.00399719	0.0134876
28.1957	28.3431	28.2342	27.875	28.2746	27.8648	27.9968	27.7926	28.0527	28.003	28.112	28.4622	28.4286	28.1909	28.1148	28.1771	28.04	28.2668	28.3009	28.1181	28.3625	28.195	28.1893	28.9996	28.1104	28.6016	28.1372	28.4082	28.292	27.9581	28.0128	28.0456	28.1712				+	23	23	15	65.6	65.6	46.7	60.577	0	232.46	58403000000	712	0.0128995	0.0337382
28.8095	28.5238	28.5657	28.4704	28.5017	28.5122	28.4101	28.476	28.74	28.6374	28.616	28.7547	28.6865	28.772	28.6038	28.6943	28.652	28.4956	28.6379	28.5843	28.8084	28.5061	28.7688	29.1778	28.5467	28.5149	28.5336	28.4842	28.0526	28.6883	28.4242	28.3083	28.238				+	28	28	28	56.5	56.5	56.5	67.254	0	323.31	73082000000	1322	0.00978964	0.0275088
31.5591	31.4316	31.5714	31.4274	31.45	30.9066	31.4905	30.6649	31.6862	31.5139	31.6419	31.6192	31.2089	31.7478	31.5695	31.2584	31.2915	31.4533	31.5389	31.6607	31.6832	31.5015	31.4411	30.6639	31.136	31.3494	31.3627	31.8647	30.7966	30.331	31.4718	31.2503	30.8243				+	10	10	7	60	60	52.1	14.515	0	323.31	452800000000	2918	0.0195244	0.0466195
31.7532	31.4591	31.4929	31.9992	31.8739	31.9491	31.5598	31.7078	31.9564	31.9006	31.4879	31.3723	31.6982	31.7442	31.8019	31.5656	32.0565	31.814	32.0401	31.4495	31.5308	31.7857	31.8968	32.6218	31.9008	31.7899	31.7087	31.7492	31.4745	31.3735	31.6139	31.1977	31.4537				+	21	21	16	84.9	84.9	62	18.532	0	323.31	652560000000	6035	0.0101705	0.0281839
34.1557	33.9177	33.9293	33.9549	33.8762	33.8129	33.9326	34.1238	33.9319	33.8997	33.8689	33.9532	33.654	33.9223	33.5466	33.7666	34.1216	33.898	33.8735	32.9954	33.8347	33.8746	34.1282	35.017	33.9696	33.9279	33.9102	34.1524	33.4386	33.5119	33.6808	33.4756	33.3014				+	38	38	33	78.7	78.7	67.5	62.277	0	323.31	2985300000000	21535	0.000714611	0.00538462
26.8288	26.563	26.6091	26.6269	26.8953	26.5642	27.2057	26.484	26.8605	26.7307	27.0629	26.8939	26.539	26.8451	26.5678	26.3286	26.6819	26.861	26.7389	27.0443	26.6101	26.8875	27.0441	27.385	26.9068	26.7605	26.6389	26.8429	24.2968	24.9407	26.4355	25.9281	26.613				+	11	11	11	31	31	31	47.216	0	145.12	19568000000	248	7.44315e-05	0.00175
32.6575	32.3961	32.3367	32.5529	32.4934	32.5422	32.2474	31.9367	32.543	32.5041	32.3835	32.3176	32.2029	32.4099	32.4457	32.4171	32.8421	32.4664	32.6318	31.8436	32.5575	32.6004	32.8034	33.6275	32.6943	32.0418	32.6764	32.7299	32.2285	31.7402	32.5453	32.1516	32.1047				+	19	19	19	88.8	88.8	88.8	26.849	0	323.31	1081300000000	7291	0.0214998	0.0488067
27.2118	26.9955	26.813	27.0199	26.9919	27.0322	26.8054	26.2261	27.1636	27.1682	27.1003	27.1334	27.0005	27.092	26.9556	27.0893	27.2937	27.1147	27.0244	28.3134	27.4647	27.1684	27.1593	25.9976	27.0481	27.1294	26.9987	27.5015	26.6269	24.8591	26.9532	27.104	24.5323				+	11	11	11	30.2	30.2	30.2	41.279	0	72.059	23962000000	279	0.00468159	0.0148615
32.2353	31.9078	31.6586	32.0389	32.0549	31.9961	31.6499	31.6834	31.768	32.0645	32.2105	31.891	31.7954	32.1419	31.7987	31.8322	32.181	32.218	31.7584	31.4256	32.011	32.1447	32.5497	33.2261	32.2116	31.7816	32.2419	31.9762	31.1924	31.6083	31.7783	31.5415	31.2402				+	17	17	9	69.4	69.4	39.1	37.377	0	323.31	760590000000	6344	0.00071179	0.0054902
29.9141	29.6856	29.5009	29.7462	29.9131	29.6729	29.6394	29.8736	29.3919	29.9385	29.9344	29.7508	29.6651	30.032	29.6764	29.6088	30.0903	29.8629	29.4628	29.7537	29.8677	29.8192	30.0587	30.9885	30.0056	29.7392	29.8318	29.6861	29.6264	29.4148	29.5116	29.4057	29.1982				+	17	11	7	69.4	48.2	40.3	37.331	0	323.31	176140000000	2192	0.00507925	0.0157647
28.3464	28.3771	28.5457	28.2274	28.413	28.1779	28.2213	28.119	28.5185	28.1602	28.0656	28.6837	27.9996	28.3765	28.0824	28.0931	28.6423	28.548	28.4139	27.4565	28.0519	28.3503	28.7592	28.4521	28.535	28.4565	28.3205	28.2718	27.0223	27.8384	28.2411	27.4797	27.0049				+	18	15	15	76.9	65.4	65.4	33.192	0	323.31	60562000000	730	0.000124145	0.00226087
32.5549	32.6354	32.5502	32.709	32.5207	32.4016	32.588	33.0114	32.547	32.7128	32.736	32.7321	32.2558	32.9241	32.229	32.4856	32.5882	32.6307	32.1928	32.8826	32.3284	32.4467	32.706	32.6239	32.3023	32.6117	32.38	32.5604	32.2252	32.1333	32.1777	32.0734	32.1514				+	24	24	22	81.4	81.4	74.9	40.068	0	323.31	1060400000000	9921	0.000763704	0.00545455
27.3878	27.3355	27.5138	27.419	27.2483	27.1465	27.6256	27.4978	27.4309	27.5518	27.3318	27.4679	27.1399	27.3426	27.0564	27.4139	27.44	27.0818	27.4213	27.1595	27.6846	27.2778	27.507	27.1354	27.19	27.5047	27.1664	27.2886	26.472	26.1059	27.0282	26.9389	26.4978				+	10	10	9	78.5	78.5	69.4	13.335	0	67.813	28730000000	465	8.36262e-07	0
31.1894	31.8047	31.7318	31.5521	31.123	31.4613	31.1851	31.0807	31.8837	30.9964	31.0652	31.5177	31.2478	31.2339	31.0345	31.0218	30.882	31.3353	31.6435	30.244	30.7889	31.0493	31.073	30.2284	30.7107	31.2498	30.7222	31.6622	30.4256	30.6454	31.4223	30.5837	30.4359				+	24	24	11	82.5	82.5	36.4	23.315	0	323.31	398430000000	3755	0.0207142	0.0488035
29.0029	28.8291	28.9989	29.1114	29.1451	29.7068	28.6376	28.2197	29.5017	29.221	28.966	29.0588	28.8983	29.1261	29.073	28.9951	28.7004	29.1048	28.8689	28.3364	28.7965	29.4077	29.4724	29.7816	29.2599	28.4881	29.1964	28.9371	27.7248	27.7382	28.8029	29.037	28.3621				+	8	8	8	50.5	50.5	50.5	22.101	0	301.72	93215000000	831	0.00909234	0.0263067
27.0487	27.0816	27.0627	26.7494	26.9382	26.8018	26.8589	26.488	27.2364	26.5803	27.1286	27.1011	26.6472	26.8768	26.4059	26.758	26.7093	26.8198	26.6436	25.0056	26.904	26.7313	27.0066	28.5206	26.5859	26.8567	26.8812	27.0654	25.8288	25.6787	26.6186	26.2782	26.3565				+	6	6	6	77.9	77.9	77.9	10.458	0	92.21	18559000000	307	0.00812835	0.0247895
32.9044	32.8961	32.8585	32.8365	32.7677	32.3954	32.8494	32.6704	32.9025	32.9232	32.997	32.9772	32.8861	33.001	32.8695	32.9894	32.9144	32.8677	32.8736	32.8556	32.9736	32.8526	33.0273	32.8108	32.8891	32.9112	32.852	32.7238	32.2864	32.604	32.6179	32.7683	32.2938				+	31	31	28	89	89	85.9	29.174	0	323.31	1412400000000	10714	8.36751e-05	0.0014
30.5112	30.4982	30.42	30.4989	30.5207	30.6984	30.4372	30.4775	30.7368	30.1902	30.161	30.2879	30.1842	30.4132	30.2162	30.4595	30.4992	30.4194	30.4301	30.2619	30.1164	30.2617	30.8194	31.3763	30.3858	30.1203	30.5232	30.3413	29.8614	29.5363	30.4972	29.7448	30.1807				+	19	19	16	89	89	75.9	22.142	0	263.98	275720000000	3318	0.00271463	0.0102136
32.0365	32.0428	31.881	31.7202	31.9256	31.6311	31.7146	31.0438	32.0085	31.5836	31.9568	31.8227	31.9152	31.5858	32.1081	31.7985	31.8555	31.8234	31.7343	31.2861	31.9027	31.2613	31.969	32.7739	31.695	31.7506	31.9352	31.9376	30.8791	30.6312	32.0673	31.5444	31.2625				+	11	11	11	60.2	60.2	60.2	11.367	0	141.72	641040000000	4034	0.0150901	0.0370095
31.2254	30.7729	30.8284	31.1103	31.223	31.0198	31.0952	31.106	30.8441	31.1697	31.0715	30.903	31.2852	31.0013	31.1361	31.162	31.4427	31.1178	31.045	30.7803	31.12	31.3733	31.5069	32.2857	31.4466	31.1934	31.3894	30.9105	31.1229	31.2061	30.9465	30.8424	31.0866				+	57	57	34	69.3	69.3	50.9	105.69	0	323.31	470620000000	6257	0.0154298	0.0375023
28.6514	28.5286	28.4847	28.5239	28.6765	28.2263	28.5694	28.6464	28.1336	28.6705	28.7872	28.4882	28.5978	28.8219	28.4111	28.5204	28.7994	28.6761	28.3144	28.3913	28.8104	28.8976	28.7986	30.0428	28.699	28.6838	28.6137	28.3404	27.9934	27.5789	28.4649	28.2682	27.6962				+	9	9	5	80	80	49.3	14.957	0	184.41	82941000000	1399	0.00157538	0.0067619
30.9217	30.6501	30.5396	30.8173	30.8006	30.5151	30.7202	31.35	30.5276	30.9964	31.0179	30.7618	30.6685	30.896	30.6902	30.6235	30.8026	30.7815	30.312	31.1894	30.7395	30.7749	31.0272	31.6179	30.8731	30.8342	30.7793	30.7151	30.3278	30.7053	30.5609	30.5293	30.2714				+	10	10	6	63.6	63.6	35.5	24.97	0	263.23	312950000000	2926	0.0209931	0.0486867
33.2293	33.2158	33.1282	33.1458	33.1931	33.0585	33.052	32.9547	33.2626	33.1315	33.1308	33.1858	33.0154	33.195	32.9795	33.0811	33.2166	33.1487	33.208	32.5406	33.1626	33.0859	33.2958	33.7966	33.1713	33.1564	33.2157	33.3638	32.6364	32.6728	33.0691	32.8754	32.7095				+	48	48	12	81.6	81.6	21.2	70.87	0	323.31	1744700000000	16611	0.000213806	0.00314286
30.62	30.7287	30.8111	30.7958	30.2643	30.4448	30.9028	30.861	31.0732	30.751	30.6756	30.9507	30.008	31.0751	30.528	30.4257	30.1651	30.578	29.8119	29.4901	30.9489	30.5602	30.6841	31.0414	29.6316	31.0146	30.409	30.4535	30.0456	30.1361	30.0669	29.8686	29.9828				+	8	8	4	60.7	60.7	34.1	14.509	0	323.31	262420000000	2303	0.018888	0.0458018
27.3906	27.0341	27.1945	27.033	26.7183	26.7794	27.3315	27.2881	26.9198	26.9799	27.6362	27.3343	26.4248	27.2894	26.1454	26.8297	26.7193	27.0919	26.5095	26.465	27.2804	26.9857	27.6817	28.6653	26.8783	27.776	26.9357	26.7667	26.7162	26.5485	26.0706	26.9902	26.2068				+	6	3	3	64	38.2	38.2	10.366	0	127.22	24860000000	334	0.006536	0.0206761
27.147	27.1769	27.1311	27.0738	26.9991	27.2621	26.8057	26.7581	26.7713	27.0239	27.1536	27.0874	27.0293	27.0698	27.1748	27.0246	27.2896	27.2254	26.9516	25.19	26.7738	27.2597	27.4762	26.6484	27.4988	25.5515	27.0988	26.9785	24.4269	25.888	26.6475	26.6799	26.189				+	15	15	15	52.7	52.7	52.7	35.076	0	154.52	24254000000	278	0.0144064	0.0362157
28.0678	27.7997	28.0079	28.0475	27.9565	27.9994	27.8886	27.6871	27.7102	27.8338	27.7405	27.8665	27.5297	27.9386	27.2826	27.7771	27.8586	27.862	27.6884	26.7708	27.7255	27.668	28.3438	27.9283	27.7895	28.4662	27.8544	28.0684	27.4198	27.5923	27.4379	27.4414	27.4051				+	9	9	4	63.1	63.1	30.1	23.553	0	136.42	44408000000	813	0.000639111	0.00590909
30.7591	31.2205	31.1271	30.8547	31.0232	30.8333	31.136	31.5591	31.0148	30.9227	30.8866	31.0314	31.1991	30.9533	30.8889	31.0109	31.0375	31.082	31.0025	31.4878	30.6795	30.8802	31.2434	31.9141	31.2682	31.424	31.1752	31.2466	30.9806	30.9368	30.8437	30.9563	31.0576				+	27	27	17	76.2	76.2	53.2	58.643	0	323.31	411670000000	4292	0.00694467	0.0216986
28.7629	28.4061	28.2973	28.5437	28.6723	28.4089	28.5858	28.9127	28.4169	28.7562	28.7527	28.5175	28.4597	28.8442	28.4953	28.5721	28.6833	28.7236	28.1688	27.7174	28.7429	28.663	28.6317	30.0918	28.7675	28.6983	28.7841	28.9117	28.4976	28.0053	28.5837	28.4088	28.3201				+	15	15	2	67.6	67.6	6.8	35.608	0	323.31	78564000000	1230	0.0194536	0.0469286
32.0832	31.9243	31.8632	32.0823	31.9015	31.3874	31.0981	30.669	31.6592	31.7988	32.5654	31.8088	31.7083	31.3897	32.2053	31.5037	31.6038	32.2161	31.9002	29.8462	31.609	32.0121	31.872	32.4946	31.6414	31.1392	31.9305	31.9785	30.3383	28.6182	31.2907	31.7985	30.611				+	28	11	0	85.9	50.7	0	42.019	0	323.31	645350000000	3038	0.0126964	0.0337021
35.215	35.0448	34.9179	35.2836	35.1894	35.3019	35.0094	34.8961	35.2519	35.2488	35.1002	34.8581	35.2355	34.9154	34.9512	35.1546	35.4498	35.0517	35.1027	34.2051	35.2995	35.288	35.3399	36.2103	35.3047	34.8116	35.2332	35.078	34.5756	34.6436	35.0491	34.6487	34.3924				+	35	35	2	77.8	77.8	6.2	50.135	0	323.31	7128200000000	44186	0.00889236	0.0257531
30.409	30.8025	30.6103	30.774	30.3694	30.8104	30.2336	30.1695	30.5685	30.6445	30.5074	30.416	30.2888	30.2494	30.4239	30.3454	30.4172	30.4376	30.3391	29.2218	30.0291	30.3468	30.7446	31.5844	30.4616	30.2807	30.4101	30.3927	29.5151	29.8393	30.6298	30.2973	29.6055				+	17	17	16	58.3	58.3	54.9	31.745	0	317.62	252480000000	2671	0.0110709	0.0299556
29.1223	29.0201	29.0123	29.1834	29.3817	29.2863	28.7744	29.0594	29.2737	29.1612	29.0325	29.1837	29.0197	29.1937	28.9533	29.1431	29.2462	29.1839	29.3342	27.8819	28.9952	29.0666	29.5138	30.4687	29.193	29.1128	29.2991	28.9171	28.3178	27.8916	29.058	28.9516	28.6969				+	16	16	6	74.6	74.6	28.5	22.427	0	188.11	117280000000	2088	0.0110479	0.0300112
26.0451	26.4025	26.4571	26.7384	26.4685	26.5642	26.4636	25.2489	26.2608	26.5855	26.14	25.6924	26.4379	26.0339	26.8962	26.5888	26.2895	26.2394	26.4796	26.2585	25.9997	26.4445	26.4601	26.7503	26.2431	26.1889	26.2447	26.0981	28.3336	26.673	26.1245	27.2268	27.105				+	13	7	6	81.1	51.1	43.3	20.529	0	101.14	16491000000	369	0.0108838	0.0297978
29.8703	29.726	29.6518	29.56	29.3693	29.7275	29.6359	29.3777	29.9307	29.4509	29.5138	29.6942	29.7381	29.505	29.4867	29.6823	29.4039	29.3364	29.6565	30.0081	29.6299	29.6286	29.9839	30.1905	29.5519	29.7077	29.2121	29.5171	28.6086	28.8503	29.3748	29.1271	28.6312				+	8	8	6	49.3	49.3	40.3	15.394	0	152.85	148790000000	1513	2.31997e-05	0
33.5103	32.9878	33.2162	33.3153	33.2529	33.1217	33.248	32.6839	33.1457	33.5941	33.3465	33.1064	32.8299	33.3846	32.832	33.0993	33.5519	33.2418	33.0669	32.5462	33.5186	33.3879	33.6441	34.5247	33.1555	33.343	33.477	33.3877	32.868	33.3029	32.8879	32.8225	32.3396				+	32	9	2	80	36.4	11.5	49.906	0	323.31	1976300000000	11075	0.0085992	0.0252658
29.6327	29.6373	29.6416	29.6505	29.5187	29.7497	29.34	29.5953	29.6344	29.6504	29.4747	29.5878	29.1078	29.4523	29.2656	29.2686	29.5917	29.5401	29.4802	29.0655	29.3694	29.4818	29.7953	29.5138	29.5846	29.6317	28.9495	29.5539	28.9322	29.1676	29.4974	29.1542	28.814				+	25	25	25	64.8	64.8	64.8	49.522	0	323.31	133950000000	1557	0.000973676	0.00603279
30.1229	29.8079	29.9784	30.113	30.097	30.1377	29.3637	28.8834	30.0965	30.0149	29.9694	29.8243	29.5203	29.957	29.8505	29.6533	30.1059	30.1814	29.9837	29.3978	29.7138	30.0499	30.1678	29.43	30.1173	29.4255	29.8285	30.3525	28.7307	28.6642	29.8013	29.5391	29.0907				+	15	15	15	37.9	37.9	37.9	43.931	0	323.31	183110000000	1816	0.00606449	0.0192518
29.7674	29.599	29.7573	29.6485	29.5435	29.5133	29.8736	29.464	29.7051	29.3296	29.5158	29.6277	29.5768	29.7002	29.2603	29.5937	29.4003	29.5674	29.486	29.2652	29.5483	29.2892	29.7822	29.9268	29.361	29.909	29.3751	29.7231	29.176	29.0945	29.7065	29.1004	29.3975				+	37	37	4	37.4	37.4	5.2	138	0	323.31	141840000000	1822	0.0102651	0.0282286
28.0314	27.7491	27.8627	27.4898	28.034	27.7848	27.3331	27.2526	27.7291	27.2675	27.3341	27.918	27.7652	27.4084	27.2261	27.5873	28.1815	27.9125	27.4886	25.9949	27.3089	27.2003	27.7103	27.6843	27.7075	27.2417	27.3604	28.3519	27.2627	25.9603	27.2193	26.952	25.2654				+	33	33	33	31	31	31	155.87	0	187.06	37755000000	359	0.00328797	0.011646
30.7945	30.5985	31.0191	30.8314	30.7682	30.7886	30.5188	30.0666	30.8739	30.9007	30.6085	30.8281	30.5137	30.8381	30.5428	30.6396	30.8831	30.8662	30.8085	30.5227	30.8807	31.1546	30.7943	29.571	30.8726	30.5521	30.6731	30.6945	29.6441	29.3042	30.6183	30.2507	29.7528				+	15	15	8	86.2	86.2	55.3	17.193	0	313.96	298700000000	2340	0.000397986	0.00502857
31.2074	31.0835	31.027	30.9604	31.1874	30.5638	30.718	30.6171	31.1306	31.0672	30.9591	31.1008	30.663	30.9808	30.813	30.9985	31.1996	31.1558	31.023	29.6417	30.9046	30.8515	31.38	32.3294	31.0464	30.7576	31.2251	31.0957	29.955	30.3742	30.8641	30.3845	30.2343				+	13	13	13	72.8	72.8	72.8	23.397	0	200.9	361860000000	2503	0.00351724	0.012386
28.3472	28.0494	28.0444	28.2802	28.0599	27.9809	28.4189	27.9384	28.2921	28.1561	28.3164	27.9365	28.1312	28.0574	28.1257	27.9808	28.4598	28.2584	28.0213	27.0897	28.2254	28.3404	28.3487	29.4947	28.186	28.5669	28.1574	28.123	27.9209	27.7932	27.9802	27.6904	27.6972				+	11	11	9	62.6	62.6	53.1	32.967	0	323.31	57819000000	847	0.0138555	0.0355578
24.8416	24.687	24.3112	25.1425	24.6962	25.283	25.7852	25.5246	25.4478	25.5141	25.2941	25.4948	25.1032	24.8996	25.5167	25.6608	24.1439	25.1631	25.2686	25.4074	25.3673	24.6334	25.7421	26.0551	25.6952	26.0802	24.6764	25.3601	27.3624	25.954	25.9587	26.2417	26.8591				+	13	13	13	33.4	33.4	33.4	54.106	0	80.132	9625100000	225	8.27678e-05	0.00147368
29.293	28.9215	28.4171	29.233	28.9876	28.8147	29.41	28.2417	28.8134	29.5277	29.4053	29.1871	28.6061	29.3035	28.9037	29.0606	29.273	29.1004	28.9698	28.2865	29.6068	29.3015	29.337	29.2785	28.9835	29.8791	29.1064	28.4194	27.7151	28.0607	28.4265	28.5931	28.0563				+	4	4	4	72.5	72.5	72.5	5.6676	0	105.06	92836000000	776	0.000983441	0.00584127
30.5229	30.1021	30.2627	30.3411	30.3716	30.2006	30.2301	30.1804	30.086	30.2897	30.3959	30.3052	30.3252	30.3077	30.1416	30.2644	30.5177	30.292	30.0907	29.8172	30.192	30.4491	30.5886	31.0583	30.4343	30.2658	30.3423	30.3106	29.6403	30.047	30.3302	29.8173	29.4136				+	39	37	35	66.9	64.6	62.1	85.342	0	323.31	261490000000	2295	0.000597465	0.00614634
28.2604	28.2897	27.9197	28.3758	28.2909	28.0217	28.2417	28.8032	28.0901	28.213	28.2093	28.4544	28.3991	28.5414	28.3907	28.3738	28.6791	28.3462	28.0118	28.0323	28.2843	28.5315	28.5467	29.1313	28.4416	28.7987	28.5402	28.4111	28.0657	27.9371	28.2018	27.8337	28.1545				+	17	14	14	66.4	58.8	58.8	37.554	0	286.29	68283000000	1149	0.000621251	0.00595349
31.9197	31.8632	31.8134	31.8457	31.9763	31.7185	31.8195	32.3565	32.0491	31.7142	31.5765	31.8255	31.5087	31.8412	31.5066	31.7257	31.9451	31.8035	31.6662	31.7541	31.4629	31.7275	32.1711	32.8511	31.8106	31.8693	31.9914	32.0016	31.2917	31.7618	31.6158	31.2239	31.4126				+	25	25	25	63.9	63.9	63.9	46.961	0	323.31	709910000000	6635	0.00044858	0.00522222
24.536	24.7999	24.9499	24.6806	24.6185	24.9445	24.3301	25.3994	24.4118	24.2733	24.6452	24.3233	26.0503	24.499	25.0002	25.0065	24.3817	24.8436	25.3649	25.8965	24.7579	24.6889	23.9388	25.2855	25.0966	24.3328	24.7054	25.0138	25.9637	25.0447	25.422	26.7579	26.1305				+	9	9	9	26	26	26	54.114	0	101.9	6076100000	192	0.00132667	0.00657534
29.1452	29.0655	29.0066	29.0232	29.0824	28.8753	28.9472	28.5091	28.9593	29.0267	28.954	29.3112	29.1497	28.9599	28.9866	29.0257	29.1161	29.1336	29.0294	29.1007	29.1429	29.1785	29.0778	29.0403	28.9197	28.818	28.9091	29.3706	27.959	27.8837	29.0784	28.5154	28.3229				+	21	21	12	60.9	60.9	37.6	46.402	0	217.31	96301000000	956	1.21419e-05	0
30.0207	29.6069	29.9523	29.9455	29.7175	29.5172	29.9015	29.3711	29.9139	29.9947	29.9683	29.7559	29.5292	30.1167	29.4083	29.8081	30.0243	29.8906	29.8398	29.0061	29.7687	29.9544	29.8976	30.8927	29.7586	29.9101	29.8276	30.0192	29.0163	29.0824	29.612	29.2463	28.8101				+	14	14	14	81.4	81.4	81.4	23.407	0	323.31	160830000000	1597	0.000387866	0.00505882
28.7465	28.8488	28.9185	28.7639	28.8341	28.5302	29.2936	29.108	28.941	28.8688	28.8954	29.0348	28.8786	29.1297	28.7712	28.9187	28.6679	28.7321	28.9386	29.1976	29.033	28.8974	28.8611	28.8269	28.7714	29.3084	28.8468	28.5299	28.3482	28.5255	28.9248	28.3351	28.6094				+	16	15	13	54.8	51.2	50.9	31.966	0	244.7	86258000000	1214	0.0128795	0.0340741
28.9293	29.2723	29.4625	29.6987	29.2193	29.2745	28.663	28.5819	29.2848	29.5857	29.2988	29.3469	29.1619	29.299	29.3514	29.2037	29.4281	29.4098	29.0852	29.6784	29.3102	29.6667	29.2726	27.8204	29.2179	28.7899	29.0192	29.0623	28.2906	28.2396	29.2318	29.0901	27.9608				+	18	18	15	36.4	36.4	29.8	61.665	0	260.16	109410000000	1087	0.00278554	0.0104381
28.2086	27.9277	28.2109	28.5768	28.0319	28.2248	27.7794	28.1707	28.316	27.652	27.7717	28.2457	27.6479	28.2192	27.9128	28.254	27.6022	28.0476	27.7512	28.239	27.7572	27.7411	28.3902	27.7267	27.4832	27.8472	27.6727	27.8924	27.5659	26.7396	27.72	27.2828	27.6553				+	10	6	0	34.6	24.7	0	37.998	0	120.37	50908000000	720	0.0018975	0.00804444
30.8303	30.4565	30.3713	30.58	30.6575	30.5001	30.5465	30.8355	30.3061	30.9195	30.6623	30.3871	30.1156	30.5623	30.0945	30.1866	31.0419	30.5724	30.4022	30.2093	30.514	30.8539	30.9148	31.9586	30.7289	30.6513	30.7853	30.6334	30.5162	30.8633	30.0809	30.1606	29.7892				+	35	32	31	79.9	73.4	72.2	62.195	0	323.31	316670000000	3798	0.0135169	0.0351179
26.987	26.705	26.3987	26.3894	26.3644	26.2087	26.7478	26.9593	26.8478	26.3082	26.7974	26.6122	26.2021	26.5308	26.3871	26.3669	26.5952	26.7269	26.4098	25.9552	26.4781	26.4164	26.851	27.8911	26.497	26.9898	26.7986	26.3346	24.7878	26.077	26.6147	25.5259	24.5968				+	6	6	6	36.9	36.9	36.9	31.829	0	63.999	16653000000	317	0.000112645	0.00247619
26.893	26.6312	26.8616	26.9673	26.7503	26.984	26.1181	26.0845	26.8893	26.8254	26.3003	26.5856	26.5097	26.1294	27.1077	26.7601	27.0881	26.9243	26.7814	24.7352	26.5181	27.027	26.7153	27.3087	26.9114	26.6986	26.8429	27.071	24.9463	23.964	26.7007	25.7749	24.8208				+	14	14	14	43.9	43.9	43.9	49.035	0	62.431	20009000000	212	0.000273091	0.00373333
27.534	27.7185	27.5654	27.7956	27.7781	27.849	28.0914	28.2937	28.0977	27.9647	27.9699	28.0608	27.2403	27.7609	27.7452	27.8861	27.6402	27.6536	27.7505	28.5807	27.7323	27.9495	27.9877	27.3019	27.3065	27.8972	27.9868	27.5786	27.0134	27.8241	27.3482	27.6602	26.8326				+	16	15	15	29.7	28.6	28.6	77.502	0	220.63	42284000000	738	0.0206588	0.0488596
29.5162	29.8193	29.831	29.8255	29.6117	29.8375	29.558	29.9617	29.77	29.5252	29.647	29.6153	29.7247	29.7212	29.612	29.7349	29.6281	29.7461	29.412	29.7803	29.4216	29.7539	29.9647	30.2915	29.6071	29.5822	29.5258	29.7936	29.2673	29.1238	29.7173	29.1635	29.3162				+	32	32	32	34.3	34.3	34.3	126.25	0	323.31	155450000000	1698	0.00141245	0.00682667
29.9222	29.8674	29.7127	29.4705	29.7932	29.7284	29.6062	29.4576	30.0189	29.564	29.6239	29.7286	29.6222	29.7211	29.5548	29.4025	29.8104	29.5159	29.8697	29.9242	29.7278	29.6736	29.5957	28.9314	29.4301	29.735	29.6495	29.834	29.0971	29.3757	29.575	29.0457	29.0944				+	15	15	14	80.9	80.9	76.9	22.109	0	241.83	153690000000	1357	0.00154524	0.0066988
29.8588	29.7426	30.0054	29.8005	29.8648	29.7293	29.6882	28.6631	30.0137	30.1311	29.9614	29.7023	29.3218	29.9254	29.6537	29.556	29.7031	29.9604	29.8609	29.5961	30.0333	29.99	29.7709	30.1512	29.6507	29.6689	29.747	29.7573	28.7497	28.4931	29.5817	29.5521	28.9374				+	24	24	13	48.9	48.9	29.7	83.001	0	323.31	176340000000	1888	0.00164517	0.00706977
30.9472	30.6922	30.6718	30.6429	30.7054	30.4679	30.7114	30.6013	30.7882	30.6416	30.7174	30.8225	30.4121	30.8647	30.5029	30.6467	30.6896	30.7549	30.4355	30.786	30.6924	30.5417	30.7712	31.1713	30.6486	30.8224	30.6064	30.7209	30.0633	30.3838	30.4272	30.257	30.1548				+	40	40	40	75	75	75	79.411	0	323.31	316040000000	4080	1.84302e-05	0
29.9745	30.1069	30.2234	29.9747	30.0692	30.0214	29.9987	30.4361	29.9959	29.8883	29.8409	30.1623	29.9614	30.0362	29.6376	29.98	30.0585	29.9345	29.5598	29.5448	29.8785	29.8262	30.1835	30.8211	30.0096	30.2476	29.9325	29.9385	29.146	29.9	29.7711	29.5741	29.482				+	20	20	20	55.8	55.8	55.8	42.353	0	323.31	209470000000	2563	0.000820406	0.00571429
30.9805	30.8491	30.8669	30.977	30.8533	30.8981	30.8762	30.6379	30.7119	30.9048	30.6221	30.9365	30.7923	30.7587	31.0019	30.9922	30.8993	30.9405	30.4628	31.3134	30.9173	30.9038	31.1024	31.267	31.0612	30.7803	31.0661	31.1338	30.6612	30.5742	30.9108	30.4273	30.616				+	19	19	18	54.4	54.4	52.9	52.848	0	323.31	359920000000	4222	0.0020883	0.00852174
27.5793	27.5665	27.6911	27.6429	27.8556	28.2543	27.7422	27.3935	27.6488	27.8831	27.8061	27.6225	27.3632	27.7761	27.2817	27.5896	27.2374	27.9974	27.1287	26.6302	27.1464	27.6301	27.4969	27.188	27.3498	26.9839	27.2199	27.7018	26.2254	24.2534	26.8386	27.2168	26.5048				+	16	16	16	40.6	40.6	40.6	47.3	0	100.42	32208000000	448	8.14243e-05	0.00155556
26.2899	26.125	25.61	26.1396	25.9003	25.9562	26.1396	27.7819	26.2922	26.5848	26.636	25.7099	26.7545	26.2285	26.6303	26.3606	26.3201	26.3228	26.4853	26.6409	26.5361	26.4506	26.1549	26.7222	26.5398	26.3079	26.5449	25.8457	27.5782	27.2461	26.565	27.103	27.718				+	18	18	18	42.8	42.8	42.8	72.603	0	222.57	17723000000	432	0.00239318	0.00908
27.8122	27.5835	27.8772	27.7286	27.5536	27.2421	27.1933	27.5673	27.4789	27.8902	27.5242	27.6573	27.2035	27.6928	27.3588	27.4155	27.8298	27.476	27.3366	27.0942	27.6041	27.4978	27.7579	27.6422	27.6272	27.4243	27.5049	27.724	26.9139	27.0043	27.439	27.2551	26.2104				+	9	9	9	56.4	56.4	56.4	26.411	0	105.11	34627000000	371	0.000707397	0.00571429
32.924	32.9922	32.7414	32.9384	32.916	32.9543	32.9139	33.0874	32.6115	32.8422	32.8208	32.9296	32.9017	32.8014	32.7696	33.0271	32.7762	32.9326	32.3185	32.2131	32.6129	32.7779	33.1289	33.1437	32.5983	32.8578	32.8673	32.633	32.2262	32.6325	32.5409	32.1684	32.324				+	25	25	14	76.5	76.5	44.3	32.904	0	323.31	1326200000000	11110	0.000698523	0.00575
29.2444	29.2761	29.0709	29.1064	29.2023	28.6614	29.0079	29.1322	28.9939	29.1912	29.108	29.243	28.662	29.3219	28.582	29.1186	29.2951	29.4003	28.644	28.5146	28.9917	28.9764	29.6503	29.427	28.8188	29.0533	29.3116	29.3363	27.6748	29.1946	28.8283	28.318	28.0536				+	8	8	8	77.7	77.7	77.7	11.433	0	299.38	109740000000	1458	0.00150374	0.00685
27.1701	27.3795	27.3874	27.2658	27.2607	27.4799	27.0889	27.2829	27.8158	27.2804	27.2018	27.2955	26.9742	27.5171	27.0659	27.2161	27.2882	27.4524	27.3786	26.8017	27.2025	27.6664	27.4319	27.0578	27.2464	26.9838	27.2229	27.4342	25.3614	24.7008	27.4078	26.8771	25.8452				+	8	8	8	70.5	70.5	70.5	14.515	0	105.89	32245000000	530	7.3678e-05	0.00186667
29.2202	28.9477	29.0691	28.8867	29.0246	29.3382	28.7286	28.1624	29.2888	29.0722	29.0009	29.0737	29.1767	29.0362	29.0393	29.1675	29.2335	29.2414	29.2559	29.19	28.9066	29.2106	29.1263	29.0672	29.1389	28.5574	29.1723	29.3901	27.9077	28.2212	29.0502	28.6306	28.0844				+	17	17	4	42.5	42.5	12.1	39.652	0	323.31	98034000000	1317	0.00031268	0.0045
28.6098	28.112	28.5944	28.2757	28.5493	28.3286	28.0513	28.144	28.5325	28.0096	28.3747	28.3057	28.2803	28.1874	28.3962	28.3088	28.0991	28.2157	28.1178	27.8454	25.1847	28.6033	28.9083	27.1056	28.5263	25.866	28.5834	28.3202	25.8942	28.2936	25.1302	27.8942	25.8242				+	3	3	1	23.1	23.1	11.6	14.272	0	16.532	56704000000	183	0.0142259	0.0358621
25.3563	26.0444	25.9331	25.1978	25.2548	25.667	25.5066	25.4824	25.3456	25.5694	25.4831	25.8472	25.0411	25.7341	25.6941	25.7972	25.7257	25.293	25.3316	26.5474	25.4017	25.4528	25.3417	24.865	25.2307	24.2215	25.2612	25.7696	25.7686	25.4655	25.7642	26.1177	26.296				+	7	7	7	41.4	41.4	41.4	21.909	0	56.799	8762500000	102	0.0146331	0.0362899
30.0875	30.2911	29.8705	29.9403	30.0612	29.6528	29.7578	29.7966	29.9411	29.9269	29.9802	30.0259	29.6083	29.9573	29.7059	29.8872	30.1081	29.948	29.7662	27.9971	29.6762	29.9436	30.2677	30.0766	30.0781	30.0926	30.1599	30.3746	28.9478	29.0742	30.0674	29.6751	29.1632				+	6	6	3	64	64	38.2	10.35	0	264.97	180940000000	1643	0.0139553	0.0357
27.887	28.059	27.975	28.1748	27.6915	28.0882	28.1472	28.7501	27.9895	28.1909	28.061	28.1373	27.4765	28.0355	27.7085	27.9479	28.0649	28.1499	27.7657	27.3778	27.882	27.7472	28.2542	28.5186	27.8915	28.3624	27.5677	28.335	27.356	28.0541	27.7654	27.5782	27.3348				+	7	7	7	76.8	76.8	76.8	9.8492	0	119.5	52456000000	989	0.00821189	0.0245974
30.5432	30.2749	30.3367	30.888	30.6959	31.115	30.0827	29.512	30.3966	30.9692	30.7922	30.6019	30.209	30.9065	30.7705	30.2241	30.7359	30.9979	30.3731	29.5104	30.2525	31.3131	30.9419	29.3756	30.6594	30.0589	30.6556	30.736	29.0921	28.7531	30.4652	30.2126	29.2374				+	10	10	9	28.4	28.4	25.5	31.195	0	323.31	281960000000	2161	0.0112444	0.0300765
28.0935	28.1908	27.9215	27.8661	27.933	28.0292	27.9972	28.0696	27.9	27.8613	27.8226	28.2819	27.9163	27.8454	27.8728	27.8204	28.0748	28.0139	27.7503	27.2063	27.5502	27.6619	28.1846	27.9739	28.1185	27.9934	27.8858	27.9934	27.3216	27.6235	27.8504	27.42	27.5411				+	24	24	24	45.4	45.4	45.4	63.727	0	109.84	46364000000	545	0.00153733	0.00678049
27.2812	27.0365	27.2216	27.3179	26.8756	27.3399	27.6108	28.0732	27.0173	26.8994	26.8023	27.2864	27.1318	26.8603	27.1178	27.1894	27.5363	27.1032	27.0605	25.9055	27.0324	27.2278	27.1186	28.2765	27.1776	27.4105	27.2576	27.1887	26.679	27.1044	26.8017	26.622	25.112				+	20	20	16	41.4	41.4	30.8	70.7	0	217.22	28599000000	400	0.0144803	0.0361366
27.337	26.9352	26.6095	27.3399	27.5516	27.1586	27.6127	28.2932	26.9907	27.3675	27.2272	26.9172	27.6167	26.9296	27.2995	27.4829	26.8717	27.1669	27.3823	27.84	27.0349	27.1562	27.4175	27.5204	27.4096	28.5163	27.1917	27.2569	28.991	28.9296	27.6893	27.4026	28.3312				+	14	14	14	38.9	38.9	38.9	37.46	0	51.431	39108000000	485	0.00177366	0.00755056
32.6506	32.4561	32.2842	32.3866	32.5148	32.2942	32.3293	32.1839	32.2902	32.3365	32.392	32.5677	32.419	32.5014	32.365	32.4057	32.5821	32.5377	32.1067	32.1286	32.3402	32.3408	32.5895	33.0781	32.508	32.3881	32.4893	32.5272	31.758	31.9402	32.3823	32.1147	31.9564				+	46	46	46	62.7	62.7	62.7	85.432	0	323.31	1034500000000	9344	0.00020389	0.00311111
27.4939	28.1722	28.06	28.4669	27.918	28.2932	27.5557	28.9435	28.0258	28.2012	28.0439	27.7781	27.9569	27.7258	27.851	27.9069	27.937	28.0751	27.6376	26.8093	27.3316	28.3568	28.6252	27.5793	28.0433	27.8579	27.8747	27.6713	26.9554	26.77	27.913	27.5665	23.9701				+	31	31	31	32.1	32.1	32.1	163.19	0	323.31	41742000000	633	0.00394896	0.0133333
26.0883	25.9809	25.9232	26.1735	26.4347	26.4807	26.2304	24.6117	26.0914	26.4551	26.0781	26.2631	26.6077	26.3535	26.7723	26.5325	26.043	26.1842	26.5191	26.8606	26.6613	26.6285	25.8713	25.879	26.4981	25.4364	26.5756	26.1076	27.0895	26.132	26.5853	26.6026	27.1046				+	13	13	13	37.6	37.6	37.6	48.612	0	76.096	15832000000	329	0.0105941	0.02925
28.6854	29.0346	29.0896	29.2679	28.8114	28.9781	28.6684	29.2672	28.8303	28.9242	28.6161	28.7502	28.4895	28.6409	28.8549	29.1012	28.7369	28.8249	28.4827	28.0285	28.2181	28.393	29.0134	29.2391	28.6234	29.4284	28.6378	29.1561	28.4383	28.7588	29.095	28.1891	28.4525				+	15	15	1	62.6	62.6	5.3	35.433	0	303.71	87806000000	1135	0.0112184	0.0301758
25.9437	26.2572	26.4107	25.7807	25.7309	26.0798	26.1404	24.6786	26.127	25.825	25.7991	26.0644	26.4433	25.4507	26.5524	26.2006	26.1579	26.0277	26.3122	26.448	26.1297	26.3116	26.2108	25.6356	26.0777	26.4639	26.5798	26.5776	27.369	26.4913	26.2141	27.4455	27.4113				+	15	15	15	37.6	37.6	37.6	38.83	0	94.073	15563000000	253	0.000482347	0.00557895
30.2306	30.0608	30.0311	29.9101	29.935	29.7805	30.0325	30.6044	29.9487	29.6916	30.0732	30.2923	29.7612	29.9382	29.6699	29.8843	30.1872	30.0648	29.7183	29.4061	29.8118	29.9603	30.4288	31.2145	30.0305	30.2397	29.9183	30.4231	29.5404	29.6068	29.8518	29.4147	29.5109				+	15	15	15	66.2	66.2	66.2	22.178	0	323.31	217440000000	2683	0.000695041	0.00587234
26.6177	26.2424	26.6684	26.5006	26.0971	26.3326	26.2088	24.847	26.8035	26.201	26.2428	26.5033	26.178	26.6591	26.4996	26.1997	26.5133	26.0551	26.4434	26.566	26.3267	26.5023	26.4165	25.8081	26.0598	26.5624	26.0643	26.4812	24.142	24.3538	26.2254	26.2551	25.5056				+	16	16	10	44.3	44.3	33	46.209	0	88.155	16285000000	164	0.00314582	0.0114595
27.4731	27.1786	27.6556	27.4754	27.3978	27.4645	26.8957	25.6678	27.6232	27.631	26.9029	27.194	27.1416	27.4804	27.4208	27.1645	27.1842	27.3179	27.4057	27.7468	27.2753	27.5516	27.2833	25.8925	27.0552	26.692	27.3136	27.3804	26.4875	24.8127	27.1874	26.6644	24.9757				+	6	6	6	77.5	77.5	77.5	10.376	0	102.03	25101000000	343	0.00172439	0.00744828
30.4719	30.1456	30.5321	30.349	30.4655	30.2892	30.3714	29.9431	30.5455	30.6127	30.5373	30.4682	30.3173	30.732	30.6038	30.5205	30.5045	30.5167	30.6674	30.6638	30.7112	30.4708	30.4579	31.1076	30.5742	30.3873	30.5456	30.5049	30.2181	29.9123	30.3852	30.5335	30.1546				+	27	27	26	66	66	64.4	50.449	0	323.31	257690000000	3063	0.0101107	0.028185
31.2855	31.5724	31.6206	31.7471	31.1653	31.7287	31.5575	31.7565	31.6717	31.3295	31.4834	31.5329	31.1087	31.3397	31.2963	31.2534	31.4635	31.4366	31.4785	30.6059	31.0931	31.2625	31.8904	32.5082	31.4425	31.5437	31.3379	31.2185	30.8463	31.2026	31.4678	31.1617	30.7355				+	17	17	17	83.4	83.4	83.4	30.755	0	323.31	559630000000	6053	0.00654849	0.0205594
[truncated: 5 more columns]
