# Supplementary material for: Global Proteome Profiling of the Temporal Cortex of Female Rats Exposed to Chronic Stress and the Western Diet
Source: Nutrients. 2022 May 5;14(9):1934. doi: 10.3390/nu14091934 (PMC9103025; doi:10.3390/nu14091934)
Supplement: Supplementary file 1 [file nutrients-14-01934-s001.zip › Supplementary data S2.xlsx]

## Sheet: Annotations analysis
Analysis Type:	PANTHER Overrepresentation Test (Released 20220202)
Annotation Version and Release Date:	GO Ontology database DOI: 10.5281/zenodo.5725227 Released 2021-11-16
Analyzed List:	ID proteins 12 weeks WD CS.txt (Rattus norvegicus)
Reference List:	Rattus norvegicus (all genes in database)
Test Type:	FISHER
Correction:	FDR
GO biological process complete	Rattus norvegicus - REFLIST (21586)	ID proteins 12 weeks WD CS.txt (164)	ID proteins 12 weeks WD CS.txt (expected)	ID proteins 12 weeks WD CS.txt (over/under)	ID proteins 12 weeks WD CS.txt (fold Enrichment)	ID proteins 12 weeks WD CS.txt (raw P-value)	ID proteins 12 weeks WD CS.txt (FDR)
response to ketamine (GO:1901986)	2	2	0.02	+	> 100	0.000336	0.0169
positive regulation of sodium ion export across plasma membrane (GO:1903278)	4	2	0.03	+	65.81	0.000831	0.0367
protein localization to juxtaparanode region of axon (GO:0071205)	4	2	0.03	+	65.81	0.000831	0.0366
negative regulation of calcium ion export across plasma membrane (GO:1905913)	4	2	0.03	+	65.81	0.000831	0.0365
glyceraldehyde-3-phosphate metabolic process (GO:0019682)	4	2	0.03	+	65.81	0.000831	0.0364
regulation of protein refolding (GO:0061083)	4	2	0.03	+	65.81	0.000831	0.0363
regulation of sodium ion export across plasma membrane (GO:1903276)	5	2	0.04	+	52.65	0.00116	0.0474
regulation of calcium ion-dependent exocytosis of neurotransmitter (GO:1903233)	5	2	0.04	+	52.65	0.00116	0.0473
protein localization to paranode region of axon (GO:0002175)	5	2	0.04	+	52.65	0.00116	0.0472
regulation of calcium ion export across plasma membrane (GO:1905912)	5	2	0.04	+	52.65	0.00116	0.047
calcium-dependent activation of synaptic vesicle fusion (GO:0099502)	5	2	0.04	+	52.65	0.00116	0.0469
positive regulation of cyclic-nucleotide phosphodiesterase activity (GO:0051343)	5	2	0.04	+	52.65	0.00116	0.0468
mitochondrial ATP synthesis coupled proton transport (GO:0042776)	16	6	0.12	+	49.36	1.13e-08	3.84e-06
regulation of synaptic vesicle membrane organization (GO:1901632)	11	4	0.08	+	47.86	3.99e-06	0.000474
regulation of synaptic vesicle fusion to presynaptic active zone membrane (GO:0031630)	11	4	0.08	+	47.86	3.99e-06	0.00047
establishment or maintenance of transmembrane electrochemical gradient (GO:0010248)	13	4	0.1	+	40.5	6.87e-06	0.00072
modification of postsynaptic actin cytoskeleton (GO:0098885)	10	3	0.08	+	39.49	0.000114	0.007
sodium ion export across plasma membrane (GO:0036376)	14	4	0.11	+	37.61	8.78e-06	0.000869
cellular potassium ion homeostasis (GO:0030007)	15	4	0.11	+	35.1	1.11e-05	0.00104
ATP synthesis coupled proton transport (GO:0015986)	23	6	0.17	+	34.34	6.9e-08	1.64e-05
energy coupled proton transport, down electrochemical gradient (GO:0015985)	23	6	0.17	+	34.34	6.9e-08	1.62e-05
relaxation of cardiac muscle (GO:0055119)	12	3	0.09	+	32.91	0.000179	0.0102
gamma-aminobutyric acid transport (GO:0015812)	14	3	0.11	+	28.2	0.000265	0.0141
positive regulation of synaptic plasticity (GO:0031915)	15	3	0.11	+	26.32	0.000316	0.0161
modification of postsynaptic structure (GO:0099010)	15	3	0.11	+	26.32	0.000316	0.0161
positive regulation of vesicle fusion (GO:0031340)	15	3	0.11	+	26.32	0.000316	0.016
ATP biosynthetic process (GO:0006754)	37	7	0.28	+	24.9	3.69e-08	1.09e-05
positive regulation of cytoplasmic translation (GO:2000767)	16	3	0.12	+	24.68	0.000373	0.0184
mitochondrial electron transport, ubiquinol to cytochrome c (GO:0006122)	16	3	0.12	+	24.68	0.000373	0.0184
presynaptic endocytosis (GO:0140238)	56	10	0.43	+	23.5	6.61e-11	5.02e-08
synaptic vesicle endocytosis (GO:0048488)	56	10	0.43	+	23.5	6.61e-11	4.79e-08
regulation of vesicle fusion (GO:0031338)	28	5	0.21	+	23.5	4.59e-06	0.000518
positive regulation by host of viral process (GO:0044794)	17	3	0.13	+	23.23	0.000437	0.0211
synaptic vesicle recycling (GO:0036465)	63	11	0.48	+	22.98	8.86e-12	7.43e-09
purine ribonucleoside triphosphate biosynthetic process (GO:0009206)	46	8	0.35	+	22.89	6.82e-09	2.79e-06
purine nucleoside triphosphate biosynthetic process (GO:0009145)	47	8	0.36	+	22.4	7.93e-09	3.01e-06
tricarboxylic acid cycle (GO:0006099)	30	5	0.23	+	21.94	6.2e-06	0.000658
protein insertion into mitochondrial membrane (GO:0051204)	18	3	0.14	+	21.94	0.000507	0.024
establishment of protein localization to mitochondrial membrane (GO:0090151)	25	4	0.19	+	21.06	6.39e-05	0.00441
negative regulation of amyloid-beta formation (GO:1902430)	19	3	0.14	+	20.78	0.000583	0.0271
regulation of synaptic vesicle endocytosis (GO:1900242)	26	4	0.2	+	20.25	7.33e-05	0.00495
ribonucleoside triphosphate biosynthetic process (GO:0009201)	52	8	0.4	+	20.25	1.61e-08	5.14e-06
synaptic vesicle priming (GO:0016082)	20	3	0.15	+	19.74	0.000667	0.0307
cellular sodium ion homeostasis (GO:0006883)	27	4	0.21	+	19.5	8.36e-05	0.00548
hydrogen peroxide catabolic process (GO:0042744)	27	4	0.21	+	19.5	8.36e-05	0.00546
potassium ion homeostasis (GO:0055075)	34	5	0.26	+	19.36	1.07e-05	0.00101
modification of synaptic structure (GO:0099563)	21	3	0.16	+	18.8	0.000758	0.0342
gluconeogenesis (GO:0006094)	28	4	0.21	+	18.8	9.5e-05	0.00613
membrane repolarization (GO:0086009)	21	3	0.16	+	18.8	0.000758	0.0341
cellular anion homeostasis (GO:0030002)	21	3	0.16	+	18.8	0.000758	0.034
negative regulation of amyloid precursor protein catabolic process (GO:1902992)	22	3	0.17	+	17.95	0.000857	0.037
synaptic vesicle cycle (GO:0099504)	133	18	1.01	+	17.81	9.19e-17	2.93e-13
hexose biosynthetic process (GO:0019319)	30	4	0.23	+	17.55	0.000121	0.00739
oxidative phosphorylation (GO:0006119)	106	14	0.81	+	17.38	3.68e-13	4.18e-10
aerobic respiration (GO:0009060)	144	19	1.09	+	17.37	1.89e-17	1e-13
purine ribonucleoside triphosphate metabolic process (GO:0009205)	62	8	0.47	+	16.98	5.59e-08	1.53e-05
relaxation of muscle (GO:0090075)	24	3	0.18	+	16.45	0.00108	0.0445
vesicle-mediated transport in synapse (GO:0099003)	144	18	1.09	+	16.45	3.27e-16	8.69e-13
nucleoside triphosphate biosynthetic process (GO:0009142)	64	8	0.49	+	16.45	6.99e-08	1.62e-05
synaptic vesicle localization (GO:0097479)	48	6	0.36	+	16.45	3.21e-06	0.0004
cellular response to copper ion (GO:0071280)	25	3	0.19	+	15.79	0.0012	0.0482
regulation of cardiac muscle cell action potential (GO:0098901)	25	3	0.19	+	15.79	0.0012	0.0481
synaptic vesicle transport (GO:0048489)	42	5	0.32	+	15.67	2.72e-05	0.00219
regulation of synaptic vesicle recycling (GO:1903421)	34	4	0.26	+	15.48	0.000188	0.0106
positive regulation of ATP-dependent activity (GO:0032781)	43	5	0.33	+	15.3	3.02e-05	0.00237
potassium ion import across plasma membrane (GO:1990573)	43	5	0.33	+	15.3	3.02e-05	0.00236
ribonucleoside triphosphate metabolic process (GO:0009199)	69	8	0.52	+	15.26	1.19e-07	2.53e-05
cellular respiration (GO:0045333)	174	20	1.32	+	15.13	3e-17	1.19e-13
purine nucleoside triphosphate metabolic process (GO:0009144)	70	8	0.53	+	15.04	1.32e-07	2.69e-05
substantia nigra development (GO:0021762)	44	5	0.33	+	14.96	3.34e-05	0.00259
synaptic vesicle exocytosis (GO:0016079)	63	7	0.48	+	14.62	9.8e-07	0.00015
monosaccharide biosynthetic process (GO:0046364)	36	4	0.27	+	14.62	0.00023	0.0127
pyruvate metabolic process (GO:0006090)	92	10	0.7	+	14.31	5.29e-09	2.28e-06
mitochondrial ATP synthesis coupled electron transport (GO:0042775)	75	8	0.57	+	14.04	2.15e-07	3.98e-05
negative regulation of calcium ion transmembrane transport (GO:1903170)	47	5	0.36	+	14	4.48e-05	0.00326
glycolytic process (GO:0006096)	66	7	0.5	+	13.96	1.31e-06	0.000193
neurotransmitter secretion (GO:0007269)	95	10	0.72	+	13.85	7.03e-09	2.8e-06
signal release from synapse (GO:0099643)	95	10	0.72	+	13.85	7.03e-09	2.73e-06
ATP generation from ADP (GO:0006757)	67	7	0.51	+	13.75	1.44e-06	0.00021
ATP synthesis coupled electron transport (GO:0042773)	77	8	0.59	+	13.68	2.59e-07	4.74e-05
ATP metabolic process (GO:0046034)	225	23	1.71	+	13.45	1.18e-18	9.42e-15
respiratory electron transport chain (GO:0022904)	99	10	0.75	+	13.3	1.01e-08	3.58e-06
sodium ion homeostasis (GO:0055078)	40	4	0.3	+	13.16	0.000334	0.0169
hydrogen peroxide metabolic process (GO:0042743)	42	4	0.32	+	12.54	0.000397	0.0194
NADH dehydrogenase complex assembly (GO:0010257)	64	6	0.49	+	12.34	1.48e-05	0.0013
mitochondrial respiratory chain complex I assembly (GO:0032981)	64	6	0.49	+	12.34	1.48e-05	0.00129
nucleoside diphosphate phosphorylation (GO:0006165)	86	8	0.65	+	12.24	5.65e-07	9.1e-05
neurotransmitter transport (GO:0006836)	140	13	1.06	+	12.22	1.52e-10	9.66e-08
ADP metabolic process (GO:0046031)	76	7	0.58	+	12.12	3.13e-06	0.000392
mitochondrial transmembrane transport (GO:1990542)	98	9	0.74	+	12.09	1.21e-07	2.53e-05
metal ion export (GO:0070839)	44	4	0.33	+	11.97	0.000468	0.0224
acidic amino acid transport (GO:0015800)	44	4	0.33	+	11.97	0.000468	0.0223
nucleotide phosphorylation (GO:0046939)	89	8	0.68	+	11.83	7.2e-07	0.000112
aerobic electron transport chain (GO:0019646)	67	6	0.51	+	11.79	1.88e-05	0.0016
energy derivation by oxidation of organic compounds (GO:0015980)	232	20	1.76	+	11.35	4.93e-15	7.85e-12
regulation of postsynaptic membrane neurotransmitter receptor levels (GO:0099072)	59	5	0.45	+	11.15	0.000122	0.00739
purine ribonucleoside diphosphate metabolic process (GO:0009179)	83	7	0.63	+	11.1	5.39e-06	0.000584
purine nucleoside diphosphate metabolic process (GO:0009135)	83	7	0.63	+	11.1	5.39e-06	0.00058
nucleoside triphosphate metabolic process (GO:0009141)	95	8	0.72	+	11.08	1.14e-06	0.000171
generation of precursor metabolites and energy (GO:0006091)	352	29	2.67	+	10.84	6.41e-21	1.02e-16
negative regulation of calcium ion transport (GO:0051926)	73	6	0.55	+	10.82	2.96e-05	0.00234
electron transport chain (GO:0022900)	122	10	0.93	+	10.79	6.39e-08	1.62e-05
establishment of protein localization to mitochondrion (GO:0072655)	74	6	0.56	+	10.67	3.18e-05	0.00247
exocytic process (GO:0140029)	75	6	0.57	+	10.53	3.41e-05	0.00263
negative regulation of protein polymerization (GO:0032272)	77	6	0.59	+	10.26	3.92e-05	0.00294
ribonucleoside diphosphate metabolic process (GO:0009185)	92	7	0.7	+	10.01	1.01e-05	0.000973
proton transmembrane transport (GO:1902600)	120	9	0.91	+	9.87	5.98e-07	9.53e-05
regulation of ATP-dependent activity (GO:0043462)	67	5	0.51	+	9.82	0.000213	0.0118
export across plasma membrane (GO:0140115)	54	4	0.41	+	9.75	0.000963	0.0406
protein localization to mitochondrion (GO:0070585)	81	6	0.62	+	9.75	5.11e-05	0.00365
purine ribonucleotide biosynthetic process (GO:0009152)	136	10	1.03	+	9.68	1.66e-07	3.3e-05
mitochondrial transport (GO:0006839)	151	11	1.15	+	9.59	4.29e-08	1.2e-05
neural nucleus development (GO:0048857)	70	5	0.53	+	9.4	0.000259	0.0139
nucleoside diphosphate metabolic process (GO:0009132)	112	8	0.85	+	9.4	3.62e-06	0.00044
response to amyloid-beta (GO:1904645)	57	4	0.43	+	9.24	0.00116	0.0468
regulation of cardiac muscle contraction (GO:0055117)	72	5	0.55	+	9.14	0.000292	0.0152
cellular protein complex disassembly (GO:0043624)	58	4	0.44	+	9.08	0.00124	0.049
purine nucleotide biosynthetic process (GO:0006164)	145	10	1.1	+	9.08	2.89e-07	5.18e-05
glucose metabolic process (GO:0006006)	102	7	0.77	+	9.03	1.91e-05	0.00161
membrane docking (GO:0022406)	88	6	0.67	+	8.97	7.9e-05	0.00526
mitochondrial membrane organization (GO:0007006)	105	7	0.8	+	8.77	2.27e-05	0.00187
cardiac muscle contraction (GO:0060048)	75	5	0.57	+	8.77	0.000349	0.0174
ribonucleotide biosynthetic process (GO:0009260)	150	10	1.14	+	8.77	3.89e-07	6.52e-05
regulation of neurotransmitter levels (GO:0001505)	273	18	2.07	+	8.68	8.45e-12	7.48e-09
purine-containing compound biosynthetic process (GO:0072522)	152	10	1.15	+	8.66	4.36e-07	7.24e-05
midbrain development (GO:0030901)	92	6	0.7	+	8.58	9.96e-05	0.00635
dicarboxylic acid metabolic process (GO:0043648)	93	6	0.71	+	8.49	0.000105	0.00666
organelle localization by membrane tethering (GO:0140056)	78	5	0.59	+	8.44	0.000414	0.0201
ribose phosphate biosynthetic process (GO:0046390)	158	10	1.2	+	8.33	6.1e-07	9.62e-05
mitochondrial respiratory chain complex assembly (GO:0033108)	97	6	0.74	+	8.14	0.000131	0.00788
negative regulation of cation transmembrane transport (GO:1904063)	98	6	0.74	+	8.06	0.000138	0.00825
carbohydrate catabolic process (GO:0016052)	115	7	0.87	+	8.01	3.95e-05	0.00295
hexose metabolic process (GO:0019318)	132	8	1	+	7.98	1.13e-05	0.00105
regulation of striated muscle contraction (GO:0006942)	88	5	0.67	+	7.48	0.000698	0.0321
vesicle fusion (GO:0006906)	88	5	0.67	+	7.48	0.000698	0.032
inorganic ion import across plasma membrane (GO:0099587)	88	5	0.67	+	7.48	0.000698	0.0319
negative regulation of transporter activity (GO:0032410)	88	5	0.67	+	7.48	0.000698	0.0318
inorganic cation import across plasma membrane (GO:0098659)	88	5	0.67	+	7.48	0.000698	0.0317
response to activity (GO:0014823)	141	8	1.07	+	7.47	1.78e-05	0.00153
regulation of calcium ion transmembrane transporter activity (GO:1901019)	90	5	0.68	+	7.31	0.000769	0.0344
heart contraction (GO:0060047)	91	5	0.69	+	7.23	0.000807	0.0358
negative regulation of ion transmembrane transport (GO:0034766)	110	6	0.84	+	7.18	0.000251	0.0136
regulation of potassium ion transmembrane transport (GO:1901379)	92	5	0.7	+	7.15	0.000845	0.0368
organelle membrane fusion (GO:0090174)	92	5	0.7	+	7.15	0.000845	0.0367
protein-containing complex disassembly (GO:0032984)	129	7	0.98	+	7.14	7.88e-05	0.00527
cellular monovalent inorganic cation homeostasis (GO:0030004)	111	6	0.84	+	7.11	0.000263	0.014
regulation of synaptic vesicle exocytosis (GO:2000300)	93	5	0.71	+	7.08	0.000885	0.0379
regulation of protein dephosphorylation (GO:0035304)	93	5	0.71	+	7.08	0.000885	0.0378
regulation of protein polymerization (GO:0032271)	206	11	1.57	+	7.03	8.18e-07	0.000127
regulation of postsynapse organization (GO:0099175)	113	6	0.86	+	6.99	0.000288	0.0151
positive regulation of plasma membrane bounded cell projection assembly (GO:0120034)	113	6	0.86	+	6.99	0.000288	0.0151
organelle fusion (GO:0048284)	113	6	0.86	+	6.99	0.000288	0.015
monosaccharide metabolic process (GO:0005996)	151	8	1.15	+	6.97	2.84e-05	0.00227
positive regulation of insulin secretion (GO:0032024)	95	5	0.72	+	6.93	0.00097	0.0408
regulation of sodium ion transport (GO:0002028)	96	5	0.73	+	6.86	0.00101	0.0422
signal release (GO:0023061)	193	10	1.47	+	6.82	3.39e-06	0.000415
striated muscle contraction (GO:0006941)	116	6	0.88	+	6.81	0.00033	0.0167
regulated exocytosis (GO:0045055)	136	7	1.03	+	6.77	0.000108	0.00677
regulation of neurotransmitter secretion (GO:0046928)	136	7	1.03	+	6.77	0.000108	0.00674
vesicle localization (GO:0051648)	156	8	1.19	+	6.75	3.55e-05	0.00272
reactive oxygen species metabolic process (GO:0072593)	98	5	0.74	+	6.72	0.00111	0.0455
regulation of calcium ion transmembrane transport (GO:1903169)	177	9	1.34	+	6.69	1.22e-05	0.0011
purine ribonucleotide metabolic process (GO:0009150)	315	16	2.39	+	6.69	4.64e-09	2.05e-06
nucleotide biosynthetic process (GO:0009165)	199	10	1.51	+	6.61	4.39e-06	0.000507
calcium-mediated signaling (GO:0019722)	142	7	1.08	+	6.49	0.000139	0.00829
nucleoside phosphate biosynthetic process (GO:1901293)	203	10	1.54	+	6.48	5.19e-06	0.000571
negative regulation of ion transport (GO:0043271)	183	9	1.39	+	6.47	1.57e-05	0.00137
hippocampus development (GO:0021766)	123	6	0.93	+	6.42	0.000444	0.0213
establishment of vesicle localization (GO:0051650)	144	7	1.09	+	6.4	0.000151	0.00887
negative regulation of protein-containing complex assembly (GO:0031333)	144	7	1.09	+	6.4	0.000151	0.00884
purine nucleotide metabolic process (GO:0006163)	330	16	2.51	+	6.38	8.7e-09	3.22e-06
trans-synaptic signaling (GO:0099537)	394	19	2.99	+	6.35	3.5e-10	2.07e-07
chemical synaptic transmission (GO:0007268)	375	18	2.85	+	6.32	1.13e-09	5.99e-07
anterograde trans-synaptic signaling (GO:0098916)	375	18	2.85	+	6.32	1.13e-09	5.79e-07
ribonucleotide metabolic process (GO:0009259)	334	16	2.54	+	6.31	1.02e-08	3.54e-06
purine-containing compound metabolic process (GO:0072521)	356	17	2.7	+	6.29	3.61e-09	1.64e-06
negative regulation of supramolecular fiber organization (GO:1902904)	168	8	1.28	+	6.27	5.86e-05	0.00409
amino acid transport (GO:0006865)	127	6	0.96	+	6.22	0.000522	0.0246
receptor-mediated endocytosis (GO:0006898)	150	7	1.14	+	6.14	0.000193	0.0108
ribose phosphate metabolic process (GO:0019693)	345	16	2.62	+	6.1	1.58e-08	5.14e-06
regulation of heart contraction (GO:0008016)	195	9	1.48	+	6.07	2.55e-05	0.00206
regulation of neurotransmitter transport (GO:0051588)	152	7	1.15	+	6.06	0.000208	0.0116
limbic system development (GO:0021761)	155	7	1.18	+	5.94	0.000234	0.0127
regulation of synapse structure or activity (GO:0050803)	270	12	2.05	+	5.85	1.63e-06	0.000236
protein folding (GO:0006457)	181	8	1.38	+	5.82	9.65e-05	0.00617
synaptic signaling (GO:0099536)	430	19	3.27	+	5.82	1.41e-09	6.79e-07
membrane fusion (GO:0061025)	136	6	1.03	+	5.81	0.000738	0.0334
regulation of synaptic plasticity (GO:0048167)	250	11	1.9	+	5.79	4.9e-06	0.00055
cellular glucose homeostasis (GO:0001678)	138	6	1.05	+	5.72	0.000793	0.0354
potassium ion transmembrane transport (GO:0071805)	162	7	1.23	+	5.69	0.000302	0.0156
synapse organization (GO:0050808)	324	14	2.46	+	5.69	2.97e-07	5.19e-05
negative regulation of transmembrane transport (GO:0034763)	139	6	1.06	+	5.68	0.000823	0.0364
regulation of actin filament polymerization (GO:0030833)	141	6	1.07	+	5.6	0.000883	0.0379
negative regulation of cytoskeleton organization (GO:0051494)	165	7	1.25	+	5.58	0.000336	0.0168
monovalent inorganic cation homeostasis (GO:0055067)	142	6	1.08	+	5.56	0.000915	0.0388
regulation of synapse organization (GO:0050807)	262	11	1.99	+	5.53	7.51e-06	0.000772
vesicle organization (GO:0016050)	262	11	1.99	+	5.53	7.51e-06	0.000767
import across plasma membrane (GO:0098739)	143	6	1.09	+	5.52	0.000948	0.04
regulation of transmembrane transporter activity (GO:0022898)	286	12	2.17	+	5.52	2.88e-06	0.00037
potassium ion transport (GO:0006813)	173	7	1.31	+	5.33	0.000442	0.0213
regulation of plasma membrane bounded cell projection assembly (GO:0120032)	199	8	1.51	+	5.29	0.000181	0.0103
exocytosis (GO:0006887)	224	9	1.7	+	5.29	7.15e-05	0.00485
regulation of transporter activity (GO:0032409)	299	12	2.27	+	5.28	4.46e-06	0.000511
regulation of ion transmembrane transporter activity (GO:0032412)	275	11	2.09	+	5.26	1.16e-05	0.00106
regulation of cell projection assembly (GO:0060491)	202	8	1.53	+	5.21	0.000199	0.0111
nucleotide metabolic process (GO:0009117)	407	16	3.09	+	5.17	1.4e-07	2.83e-05
response to calcium ion (GO:0051592)	179	7	1.36	+	5.15	0.000538	0.0253
protein localization to cell periphery (GO:1990778)	259	10	1.97	+	5.08	3.91e-05	0.00295
nucleoside phosphate metabolic process (GO:0006753)	417	16	3.17	+	5.05	1.93e-07	3.74e-05
regulation of exocytosis (GO:0017157)	261	10	1.98	+	5.04	4.16e-05	0.00309
regulation of protein-containing complex assembly (GO:0043254)	418	16	3.18	+	5.04	1.99e-07	3.77e-05
regulation of vesicle-mediated transport (GO:0060627)	629	24	4.78	+	5.02	1.45e-10	1e-07
regulation of endocytosis (GO:0030100)	237	9	1.8	+	5	0.000108	0.00673
mitochondrion organization (GO:0007005)	449	17	3.41	+	4.98	9.4e-08	2.08e-05
cellular response to metal ion (GO:0071248)	247	9	1.88	+	4.8	0.000146	0.00859
positive regulation of cell growth (GO:0030307)	194	7	1.47	+	4.75	0.00085	0.0368
learning (GO:0007612)	195	7	1.48	+	4.72	0.000875	0.0377
nucleobase-containing small molecule metabolic process (GO:0055086)	474	17	3.6	+	4.72	1.97e-07	3.79e-05
response to ethanol (GO:0045471)	251	9	1.91	+	4.72	0.000164	0.00944
regulation of insulin secretion (GO:0050796)	196	7	1.49	+	4.7	0.000901	0.0383
cellular response to inorganic substance (GO:0071241)	285	10	2.17	+	4.62	8.45e-05	0.0055
export from cell (GO:0140352)	435	15	3.3	+	4.54	1.71e-06	0.000244
modulation of chemical synaptic transmission (GO:0050804)	551	19	4.19	+	4.54	6.53e-08	1.63e-05
regulation of trans-synaptic signaling (GO:0099177)	552	19	4.19	+	4.53	6.71e-08	1.65e-05
regulation of calcium ion transport (GO:0051924)	293	10	2.23	+	4.49	0.000105	0.00664
regulation of cation transmembrane transport (GO:1904062)	381	13	2.89	+	4.49	9.64e-06	0.000936
regulation of supramolecular fiber organization (GO:1902903)	382	13	2.9	+	4.48	9.9e-06	0.000956
second-messenger-mediated signaling (GO:0019932)	207	7	1.57	+	4.45	0.00122	0.0486
protein localization to plasma membrane (GO:0072659)	208	7	1.58	+	4.43	0.00126	0.0495
regulation of blood circulation (GO:1903522)	269	9	2.04	+	4.4	0.00027	0.0143
negative regulation of phosphorus metabolic process (GO:0010563)	449	15	3.41	+	4.4	2.49e-06	0.000328
negative regulation of phosphate metabolic process (GO:0045936)	449	15	3.41	+	4.4	2.49e-06	0.000326
regulation of actin filament organization (GO:0110053)	270	9	2.05	+	4.39	0.000277	0.0146
response to oxidative stress (GO:0006979)	453	15	3.44	+	4.36	2.77e-06	0.000359
positive regulation of establishment of protein localization (GO:1904951)	364	12	2.77	+	4.34	2.97e-05	0.00234
membrane organization (GO:0061024)	762	25	5.79	+	4.32	1.19e-09	5.93e-07
protein localization to membrane (GO:0072657)	466	15	3.54	+	4.24	3.86e-06	0.000463
positive regulation of protein transport (GO:0051222)	348	11	2.64	+	4.16	9.21e-05	0.00597
organophosphate biosynthetic process (GO:0090407)	445	14	3.38	+	4.14	1.06e-05	0.001
endocytosis (GO:0006897)	478	15	3.63	+	4.13	5.2e-06	0.000567
regulation of membrane potential (GO:0042391)	480	15	3.65	+	4.11	5.46e-06	0.000584
regulation of metal ion transport (GO:0010959)	449	14	3.41	+	4.1	1.16e-05	0.00106
regulation of muscle system process (GO:0090257)	259	8	1.97	+	4.07	0.000977	0.0407
negative regulation of transport (GO:0051051)	521	16	3.96	+	4.04	3.25e-06	0.000401
organelle localization (GO:0051640)	489	15	3.72	+	4.04	6.77e-06	0.000715
negative regulation of phosphorylation (GO:0042326)	392	12	2.98	+	4.03	5.94e-05	0.00413
establishment of protein localization to organelle (GO:0072594)	327	10	2.48	+	4.03	0.000249	0.0135
inorganic cation transmembrane transport (GO:0098662)	564	17	4.28	+	3.97	2.01e-06	0.000279
localization within membrane (GO:0051668)	532	16	4.04	+	3.96	4.2e-06	0.000489
axonogenesis (GO:0007409)	366	11	2.78	+	3.96	0.000142	0.00839
neuron projection morphogenesis (GO:0048812)	501	15	3.81	+	3.94	8.96e-06	0.000876
actin filament organization (GO:0007015)	268	8	2.04	+	3.93	0.00121	0.0482
positive regulation of secretion by cell (GO:1903532)	369	11	2.8	+	3.92	0.000152	0.00882
regulation of protein stability (GO:0031647)	303	9	2.3	+	3.91	0.000623	0.0287
plasma membrane bounded cell projection morphogenesis (GO:0120039)	507	15	3.85	+	3.89	1.03e-05	0.00098
regulation of actin filament-based process (GO:0032970)	406	12	3.08	+	3.89	8.21e-05	0.0054
carbohydrate metabolic process (GO:0005975)	442	13	3.36	+	3.87	4.33e-05	0.00318
positive regulation of cell projection organization (GO:0031346)	443	13	3.37	+	3.86	4.43e-05	0.00324
cell projection morphogenesis (GO:0048858)	512	15	3.89	+	3.86	1.15e-05	0.00106
establishment of localization in cell (GO:0051649)	1654	48	12.57	+	3.82	4e-16	9.1e-13
positive regulation of protein localization (GO:1903829)	517	15	3.93	+	3.82	1.29e-05	0.00114
establishment of organelle localization (GO:0051656)	348	10	2.64	+	3.78	0.000402	0.0196
secretion by cell (GO:0032940)	386	11	2.93	+	3.75	0.000221	0.0123
organophosphate metabolic process (GO:0019637)	811	23	6.16	+	3.73	7.9e-08	1.8e-05
cation transmembrane transport (GO:0098655)	636	18	4.83	+	3.73	2.35e-06	0.000312
positive regulation of transport (GO:0051050)	1097	31	8.33	+	3.72	3.34e-10	2.04e-07
regulation of plasma membrane bounded cell projection organization (GO:0120035)	745	21	5.66	+	3.71	3.37e-07	5.77e-05
actin cytoskeleton organization (GO:0030036)	537	15	4.08	+	3.68	1.98e-05	0.00165
regulation of ion transmembrane transport (GO:0034765)	502	14	3.81	+	3.67	3.84e-05	0.00291
regulation of actin cytoskeleton organization (GO:0032956)	359	10	2.73	+	3.67	0.000509	0.0241
cell part morphogenesis (GO:0032990)	539	15	4.1	+	3.66	2.06e-05	0.00171
regulation of cell projection organization (GO:0031344)	763	21	5.8	+	3.62	4.92e-07	8e-05
small molecule catabolic process (GO:0044282)	327	9	2.48	+	3.62	0.00105	0.0434
regulation of cellular component size (GO:0032535)	400	11	3.04	+	3.62	0.000298	0.0154
regulation of cellular component biogenesis (GO:0044087)	984	27	7.48	+	3.61	9.97e-09	3.61e-06
regulation of cellular amide metabolic process (GO:0034248)	438	12	3.33	+	3.61	0.000164	0.00944
actin filament-based process (GO:0030029)	590	16	4.48	+	3.57	1.47e-05	0.0013
positive regulation of ion transport (GO:0043270)	332	9	2.52	+	3.57	0.00116	0.0469
regulation of secretion by cell (GO:1903530)	702	19	5.33	+	3.56	2.28e-06	0.000308
inorganic ion transmembrane transport (GO:0098660)	630	17	4.79	+	3.55	8.37e-06	0.000839
positive regulation of organelle organization (GO:0010638)	519	14	3.94	+	3.55	5.45e-05	0.00384
response to metal ion (GO:0010038)	520	14	3.95	+	3.54	5.56e-05	0.0039
cellular homeostasis (GO:0019725)	931	25	7.07	+	3.53	5.65e-08	1.53e-05
brain development (GO:0007420)	940	25	7.14	+	3.5	6.76e-08	1.63e-05
axon development (GO:0061564)	414	11	3.15	+	3.5	0.000395	0.0194
regulation of ion transport (GO:0043269)	755	20	5.74	+	3.49	1.67e-06	0.00024
positive regulation of cellular component biogenesis (GO:0044089)	532	14	4.04	+	3.46	7.05e-05	0.00482
cell junction organization (GO:0034330)	532	14	4.04	+	3.46	7.05e-05	0.0048
secretion (GO:0046903)	536	14	4.07	+	3.44	7.62e-05	0.00512
cell morphogenesis involved in neuron differentiation (GO:0048667)	460	12	3.49	+	3.43	0.000253	0.0137
protein localization to organelle (GO:0033365)	690	18	5.24	+	3.43	7.03e-06	0.000732
regulation of cytoskeleton organization (GO:0051493)	539	14	4.1	+	3.42	8.07e-05	0.00535
positive regulation of secretion (GO:0051047)	424	11	3.22	+	3.41	0.00048	0.0228
regulation of secretion (GO:0051046)	786	20	5.97	+	3.35	3.02e-06	0.000382
carboxylic acid metabolic process (GO:0019752)	828	21	6.29	+	3.34	1.76e-06	0.000248
ion transmembrane transport (GO:0034220)	829	21	6.3	+	3.33	1.79e-06	0.000251
regulation of neuron projection development (GO:0010975)	555	14	4.22	+	3.32	0.000109	0.00675
head development (GO:0060322)	993	25	7.54	+	3.31	1.87e-07	3.67e-05
cellular component morphogenesis (GO:0032989)	637	16	4.84	+	3.31	3.64e-05	0.00278
cation transport (GO:0006812)	837	21	6.36	+	3.3	2.08e-06	0.000286
intracellular transport (GO:0046907)	1281	32	9.73	+	3.29	3.21e-09	1.51e-06
cellular chemical homeostasis (GO:0055082)	841	21	6.39	+	3.29	2.24e-06	0.000305
oxoacid metabolic process (GO:0043436)	843	21	6.4	+	3.28	2.32e-06	0.000311
response to inorganic substance (GO:0010035)	767	19	5.83	+	3.26	7.89e-06	0.000801
regulation of establishment of protein localization (GO:0070201)	610	15	4.63	+	3.24	8.12e-05	0.00537
cell-cell signaling (GO:0007267)	815	20	6.19	+	3.23	5.12e-06	0.000567
cellular localization (GO:0051641)	2327	57	17.68	+	3.22	4.49e-16	8.95e-13
monocarboxylic acid metabolic process (GO:0032787)	532	13	4.04	+	3.22	0.00026	0.0139
anion transport (GO:0006820)	452	11	3.43	+	3.2	0.000802	0.0357
neuron projection development (GO:0031175)	744	18	5.65	+	3.18	1.89e-05	0.0016
organic acid metabolic process (GO:0006082)	871	21	6.62	+	3.17	3.81e-06	0.00046
regulation of protein transport (GO:0051223)	584	14	4.44	+	3.16	0.000182	0.0103
aging (GO:0007568)	463	11	3.52	+	3.13	0.00097	0.0407
negative regulation of cellular component organization (GO:0051129)	716	17	5.44	+	3.13	4.1e-05	0.00305
regulation of organelle organization (GO:0033043)	1147	27	8.71	+	3.1	2.11e-07	3.96e-05
regulation of transport (GO:0051049)	1966	46	14.94	+	3.08	3.89e-12	3.64e-09
cellular protein localization (GO:0034613)	1380	32	10.48	+	3.05	1.83e-08	5.59e-06
positive regulation of cellular component organization (GO:0051130)	1166	27	8.86	+	3.05	2.9e-07	5.13e-05
regulation of system process (GO:0044057)	648	15	4.92	+	3.05	0.000155	0.009
regulation of transmembrane transport (GO:0034762)	605	14	4.6	+	3.05	0.00026	0.0139
vesicle-mediated transport (GO:0016192)	1256	29	9.54	+	3.04	1.04e-07	2.24e-05
response to xenobiotic stimulus (GO:0009410)	693	16	5.27	+	3.04	9.59e-05	0.00616
cellular macromolecule localization (GO:0070727)	1390	32	10.56	+	3.03	2.16e-08	6.48e-06
central nervous system development (GO:0007417)	1195	27	9.08	+	2.97	4.65e-07	7.63e-05
ion transport (GO:0006811)	1171	26	8.9	+	2.92	1.08e-06	0.000163
response to organonitrogen compound (GO:0010243)	1317	29	10.01	+	2.9	2.76e-07	5e-05
response to oxygen-containing compound (GO:1901700)	2045	45	15.54	+	2.9	5.41e-11	4.31e-08
neuron development (GO:0048666)	917	20	6.97	+	2.87	2.72e-05	0.00218
carbohydrate derivative metabolic process (GO:1901135)	880	19	6.69	+	2.84	5.01e-05	0.00361
small molecule metabolic process (GO:0044281)	1530	33	11.62	+	2.84	5.71e-08	1.52e-05
regulation of cellular component organization (GO:0051128)	2417	52	18.36	+	2.83	2.2e-12	2.19e-09
intracellular protein transport (GO:0006886)	653	14	4.96	+	2.82	0.000547	0.0256
cellular ion homeostasis (GO:0006873)	701	15	5.33	+	2.82	0.000353	0.0176
response to nitrogen compound (GO:1901698)	1407	30	10.69	+	2.81	3.26e-07	5.64e-05
cell morphogenesis (GO:0000902)	764	16	5.8	+	2.76	0.000283	0.0149
cell projection organization (GO:0030030)	1196	25	9.09	+	2.75	5.05e-06	0.000563
metal ion transport (GO:0030001)	622	13	4.73	+	2.75	0.00108	0.0445
regulation of protein localization (GO:0032880)	962	20	7.31	+	2.74	5.25e-05	0.00372
plasma membrane bounded cell projection organization (GO:0120036)	1156	24	8.78	+	2.73	8.92e-06	0.000878
response to peptide (GO:1901652)	630	13	4.79	+	2.72	0.00121	0.0482
ion homeostasis (GO:0050801)	829	17	6.3	+	2.7	0.000231	0.0127
cellular protein-containing complex assembly (GO:0034622)	781	16	5.93	+	2.7	0.000359	0.0178
protein-containing complex subunit organization (GO:0043933)	1318	27	10.01	+	2.7	2.91e-06	0.00037
transmembrane transport (GO:0055085)	1172	24	8.9	+	2.7	1.12e-05	0.00104
generation of neurons (GO:0048699)	1417	29	10.77	+	2.69	1.2e-06	0.000178
nervous system development (GO:0007399)	2361	48	17.94	+	2.68	1.47e-10	9.79e-08
neuron differentiation (GO:0030182)	1140	23	8.66	+	2.66	2.18e-05	0.0018
cytoskeleton organization (GO:0007010)	1147	23	8.71	+	2.64	2.4e-05	0.00195
nitrogen compound transport (GO:0071705)	1425	28	10.83	+	2.59	4.06e-06	0.000475
protein localization (GO:0008104)	1835	36	13.94	+	2.58	1.3e-07	2.69e-05
negative regulation of catalytic activity (GO:0043086)	768	15	5.83	+	2.57	0.000886	0.0377
negative regulation of molecular function (GO:0044092)	1142	22	8.68	+	2.54	6.57e-05	0.00451
inorganic ion homeostasis (GO:0098771)	780	15	5.93	+	2.53	0.00103	0.0428
transport (GO:0006810)	3618	69	27.49	+	2.51	2.76e-14	3.66e-11
regulation of cellular localization (GO:0060341)	899	17	6.83	+	2.49	0.000574	0.0267
macromolecule localization (GO:0033036)	2227	42	16.92	+	2.48	3.92e-08	1.14e-05
regulation of biological quality (GO:0065008)	3944	74	29.96	+	2.47	6.24e-15	9.04e-12
establishment of localization (GO:0051234)	3779	70	28.71	+	2.44	7.98e-14	9.77e-11
establishment of protein localization (GO:0045184)	1138	21	8.65	+	2.43	0.000175	0.01
neurogenesis (GO:0022008)	1572	29	11.94	+	2.43	1.22e-05	0.00111
chemical homeostasis (GO:0048878)	1248	23	9.48	+	2.43	0.000135	0.00808
protein-containing complex assembly (GO:0065003)	1146	21	8.71	+	2.41	0.000306	0.0157
regulation of anatomical structure morphogenesis (GO:0022603)	983	18	7.47	+	2.41	0.000571	0.0267
regulation of localization (GO:0032879)	2979	54	22.63	+	2.39	4.79e-10	2.63e-07
regulation of phosphate metabolic process (GO:0019220)	1441	26	10.95	+	2.37	4.99e-05	0.00361
regulation of phosphorus metabolic process (GO:0051174)	1442	26	10.96	+	2.37	5.03e-05	0.00361
organelle organization (GO:0006996)	3136	56	23.83	+	2.35	4.6e-10	2.62e-07
catabolic process (GO:0009056)	1821	32	13.84	+	2.31	7.89e-06	0.000796
cell development (GO:0048468)	1830	32	13.9	+	2.3	8.64e-06	0.00086
phosphate-containing compound metabolic process (GO:0006796)	1776	31	13.49	+	2.3	1.28e-05	0.00114
response to organic cyclic compound (GO:0014070)	1323	23	10.05	+	2.29	0.000226	0.0125
phosphorus metabolic process (GO:0006793)	1793	31	13.62	+	2.28	2.34e-05	0.00191
organic substance transport (GO:0071702)	1777	30	13.5	+	2.22	4.21e-05	0.0031
homeostatic process (GO:0042592)	1721	28	13.08	+	2.14	0.00013	0.00787
localization (GO:0051179)	5036	81	38.26	+	2.12	6.35e-13	6.75e-10
cellular catabolic process (GO:0044248)	1564	25	11.88	+	2.1	0.000415	0.0201
response to organic substance (GO:0010033)	3302	51	25.09	+	2.03	3.65e-07	6.19e-05
organic substance catabolic process (GO:1901575)	1573	24	11.95	+	2.01	0.00127	0.0498
cellular component assembly (GO:0022607)	2257	34	17.15	+	1.98	0.000101	0.0064
system development (GO:0048731)	4547	66	34.55	+	1.91	4.03e-08	1.15e-05
cellular component organization (GO:0016043)	5114	73	38.85	+	1.88	5.82e-09	2.44e-06
cellular response to chemical stimulus (GO:0070887)	2856	40	21.7	+	1.84	0.000114	0.00702
cell differentiation (GO:0030154)	3507	49	26.64	+	1.84	1.63e-05	0.0014
multicellular organism development (GO:0007275)	4881	68	37.08	+	1.83	9.4e-08	2.05e-05
cellular component biogenesis (GO:0044085)	2513	35	19.09	+	1.83	0.000362	0.0179
cellular component organization or biogenesis (GO:0071840)	5336	74	40.54	+	1.83	1.68e-08	5.24e-06
regulation of molecular function (GO:0065009)	2973	41	22.59	+	1.82	0.000145	0.00854
cellular developmental process (GO:0048869)	3555	49	27.01	+	1.81	1.95e-05	0.00164
regulation of catalytic activity (GO:0050790)	2263	31	17.19	+	1.8	0.00124	0.0491
anatomical structure development (GO:0048856)	5301	72	40.27	+	1.79	7.98e-08	1.79e-05
developmental process (GO:0032502)	5778	78	43.9	+	1.78	1.49e-08	4.95e-06
animal organ development (GO:0048513)	3599	46	27.34	+	1.68	0.000308	0.0158
response to chemical (GO:0042221)	5377	68	40.85	+	1.66	4.53e-06	0.000516
negative regulation of biological process (GO:0048519)	5324	63	40.45	+	1.56	0.000118	0.00726
cellular metabolic process (GO:0044237)	6945	81	52.76	+	1.54	7.06e-06	0.000731
negative regulation of cellular process (GO:0048523)	4885	56	37.11	+	1.51	0.000972	0.0406
multicellular organismal process (GO:0032501)	7485	84	56.87	+	1.48	1.61e-05	0.00139
response to stimulus (GO:0050896)	8830	93	67.09	+	1.39	5.97e-05	0.00413
metabolic process (GO:0008152)	7887	82	59.92	+	1.37	0.000589	0.0273
cellular process (GO:0009987)	15614	158	118.63	+	1.33	1.72e-15	3.05e-12
biological_process (GO:0008150)	18179	160	138.12	+	1.16	5.72e-08	1.47e-05
Unclassified (UNCLASSIFIED)	3407	4	25.88	-	0.15	5.72e-08	1.49e-05
detection of chemical stimulus involved in sensory perception of smell (GO:0050911)	1180	0	8.97	-	< 0.01	0.000183	0.0103
detection of chemical stimulus involved in sensory perception (GO:0050907)	1237	0	9.4	-	< 0.01	0.000122	0.00741
detection of stimulus involved in sensory perception (GO:0050906)	1321	0	10.04	-	< 0.01	5.25e-05	0.00373
Analysis type: KEGG_PATHWAY S
Term	Count	%	PValue	Genes	List Total	Pop Hits	Pop Total	Fold Enrichment	Bonferroni	Benjamini	FDR
rno05016:Huntington disease	36	15	1.09587e-17	Q9Z2L0, P81155, A0A0G2K611, A0A140TAH5, A0A0G2JSR0, Q7TQ16, F1LXA0, P11442, P08082, B2RYX1, Q6P9V6, D4A3V2, P10719, A0A0G2KAS7, B2RYT5, D3ZFQ8, P10888, A0A0G2K428, Q05962, G3V7Q6, F1LPG5, Q06647, Q2XTA8, P21571, P85108, G3V6D3, P28023, Q68FY0, D4A565, Q66HF1, P18420, D3ZYX8, P84092, D4A8U7, P35435, A0A0G2JUC7, F1M779, A0A0G2K8Q8, Q6PCU0, P28075, P28073, P15999, D3ZZ21, P68370, G3V846, B4F7C2, Q6Q…	179	307	9021	5.9097	2.67393e-15	1.45335e-15	1.19723e-15
rno05012:Parkinson disease	34	14.1667	1.27456e-17	Q9Z2L0, P0DP31, P81155, D3ZDH8, A0A0G2JSR0, Q7TQ16, F1LXA0, B2RYX1, Q6P9V6, D4A3V2, P10719, B2RYT5, D3ZFQ8, P10888, Q05962, Q9JJM9, G3V7Q6, D3ZT07, F1LPG5, Q06647, Q2XTA8, Q3LVE5, P21571, P85108, B2GV33, P04897, G3V6D3, Q68FY0, D4A565, Q66HF1, P18420, D3ZYX8, Q45QN0, P35435, G3V9Z3, Q5EEY4, Q5EEY3, A0A0G2K8Q8, Q6PCU0, P28075, P28073, P15999, D3ZZ21, P68370, B4F7C2, Q6QI09, P37377, Q0QEP3, P21913,…	179	270	9021	6.34624	3.10992e-15	1.45335e-15	1.19723e-15
rno05020:Prion disease	34	14.1667	1.78691e-17	Q9Z2L0, P81155, D4A4S3, A0A0G2JSR0, Q7TQ16, F1LXA0, B2RYX1, Q6P9V6, P63329, D4A3V2, P10719, B2RYT5, D3ZFQ8, Q3T1H3, P10888, Q05962, G3V7Q6, P13596, F1LPG5, Q06647, Q2XTA8, P21571, P85108, P63018, G3V6D3, Q68FY0, D4A565, Q66HF1, P18420, D3ZYX8, P35435, M0R6C2, F1LUV9, A0A0G2K8Q8, A0A0G2K0M8, Q6PCU0, P28075, P28073, P15999, D3ZZ21, P68370, P13852, F1LNY3, B4F7C2, Q6QI09, Q0QEP3, P21913, P34064, Q9R…	179	273	9021	6.27651	4.36005e-15	1.45335e-15	1.19723e-15
rno05022:Pathways of neurodegeneration - multiple diseases	40	16.6667	1.24472e-14	Q9Z2L0, P0DP31, P81155, D3ZDH8, A0A0G2JSR0, Q7TQ16, F1LXA0, B2RYX1, B0BMW2, Q6P9V6, P63329, D4A3V2, P10719, B2RYT5, D3ZFQ8, P10888, A0A0G2K428, Q05962, Q9JJM9, G3V7Q6, D3ZT07, F1LPG5, Q06647, Q2XTA8, Q3LVE5, P21571, P85108, P11507, G3V6D3, P28023, Q68FY0, D4A565, Q66HF1, P18420, O70351, D3ZYX8, D4A8U7, P35435, A0A0G2JUC7, Q9QWN8, A0A0G2K8Q8, Q6PCU0, P28075, P28073, P15999, F1MA36, D3ZZ21, P68370,…	179	477	9021	4.22613	3.03402e-12	7.59281e-13	6.25473e-13
rno05010:Alzheimer disease	35	14.5833	1.40307e-13	Q9Z2L0, P0DP31, Q6IRL3, P81155, A0A0G2JSR0, Q7TQ16, F1LXA0, Q540J3, B2RYX1, B0BMW2, Q6P9V6, P63329, D4A3V2, P10719, B2RYT5, D3ZFQ8, P10888, Q05962, G3V7Q6, F1LPG5, Q06647, Q2XTA8, Q3LVE5, P21571, P85108, P11507, G3V6D3, Q68FY0, D4A565, Q66HF1, P18420, O70351, D3ZYX8, P35435, Q5U1Z3, Q9JK11, F1LQN3, A0A0G2K8Q8, Q6PCU0, P28075, P28073, P15999, D3ZZ21, P68370, B4F7C2, Q6QI09, P37377, Q0QEP3, P21913,…	179	391	9021	4.51121	3.42411e-11	6.84698e-12	5.64034e-12
rno05014:Amyotrophic lateral sclerosis	33	13.75	9.46743e-13	Q9Z2L0, A7VJC2, Q7TQ16, F1LXA0, F1LNF1, B2RYX1, Q6P9V6, P63329, D4A3V2, P10719, B2RYT5, D3ZFQ8, B2GV69, P10888, A0A0G2K428, G3V7Q6, F1LM82, F1LPG5, Q06647, Q2XTA8, P21571, P85108, P62963, G3V6D3, P28023, Q68FY0, D4A565, Q66HF1, P18420, D3ZYX8, D4A8U7, P35435, A0A0G2JUC7, A0A0G2K8Q8, Q6PCU0, P28075, P28073, P15999, D3ZZ21, P68370, B4F7C2, Q6QI09, Q6URK4, Q0QEP3, Q6XVN8, P21913, P34064, Q6AYH5, F1L…	179	370	9021	4.49484	2.30992e-10	3.85009e-11	3.17159e-11
rno00190:Oxidative phosphorylation	21	8.75	3.35414e-12	D3ZAF6, G3V6D3, Q68FY0, D4A565, Q66HF1, D3ZYX8, Q7TQ16, P35435, F1LXA0, B2RYX1, D4A3V2, P10719, B2RYT5, A0A0G2K8Q8, D3ZFQ8, P10888, Q6PCU0, P15999, D3ZZ21, Q6PDU7, Q6QI09, Q0QEP3, Q06647, F1LPG5, Q2XTA8, P21913, P29419, P21571, F1LP05	179	141	9021	7.50588	8.18399e-10	1.13363e-10	9.33852e-11
rno05415:Diabetic cardiomyopathy	25	10.4167	3.71682e-12	Q9Z2L0, P11507, G3V6D3, Q68FY0, P81155, D4A565, Q4FZZ4, P26284, Q66HF1, D3ZYX8, A0A0G2JSR0, Q7TQ16, P35435, F1LXA0, A0A0G2JW90, B2RYX1, A0A0G2KAM3, F7FKI5, D4A3V2, P10719, B2RYT5, A0A0G2K8Q8, D3ZFQ8, P10888, Q6PCU0, P49432, Q05962, P15999, D3ZZ21, Q6QI09, F1LPG5, Q0QEP3, Q06647, Q2XTA8, P21913, P21571, Q9R1Z0, F1LP05, Q6P9Y4	179	214	9021	5.88746	9.069e-10	1.13363e-10	9.33852e-11
rno00010:Glycolysis / Gluconeogenesis	14	5.83333	5.4024e-10	Q2QAI2, P47860, Q4FZZ4, P26284, P16617, A0A0G2KBC7, P11884, P05708, P11980, A0A0G2JW90, A0A0A0MXY5, P47858, P08461, M0RAQ6, A0A0G2KAM3, F7FKI5, P48500, A0A0G2JVG3, P09117, F1LSP2, Q52KS1, Q6PCU3, P04764, F1LN88, Q5BJ93, Q5EB49, P49432, A0A0G2K3Q6, A0A096MJL6, O35917, O35918, M0R6F2, P07323, P25113, A0A0G2QC57, C7C5T2	179	68	9021	10.3758	1.31819e-07	1.46465e-08	1.20654e-08
rno05208:Chemical carcinogenesis - reactive oxygen species	23	9.58333	9.90714e-10	Q9Z2L0, G3V6D3, Q68FY0, P81155, D4A565, Q66HF1, D3ZYX8, A0A0G2JSR0, Q7TQ16, P35435, F1LXA0, B2RYX1, D3Z8I7, D4A3V2, P10719, B2RYT5, A0A0G2K8Q8, D3ZFQ8, P10888, Q6PCU0, P15999, Q05962, D3ZZ21, Q6QI09, Q0QEP3, Q06647, F1LPG5, Q2XTA8, P21913, P21571, Q9R1Z0, F1LP05, Q6P9Y4	179	234	9021	4.95352	2.41734e-07	2.41734e-08	1.99133e-08
rno04721:Synaptic vesicle cycle	14	5.83333	3.19852e-09	A0A0G2K3F2, D4A5W9, A0A0G2K611, A0A140TAH5, P84092, P11442, P63045, P08082, F8WG75, A9LRS8, P84087, P21707, O54745, F1M779, A0A0G2KAS7, Q62634, Q9WUW2, Q707P4, P54921, G3V846, P63012, O35458, A0A0G2JSU1, Q2XTA5, P60881, Q707P1, P24942, Q707P2, P62944, Q3ZB97, Q707P0, P21575	179	78	9021	9.04555	7.8044e-07	7.09491e-08	5.84458e-08
rno04714:Thermogenesis	21	8.75	3.81188e-08	D3ZAF6, G3V6D3, Q68FY0, D4A565, Q66HF1, D3ZYX8, Q7TQ16, P35435, F1LXA0, B2RYX1, D4A3V2, P10719, B2RYT5, A0A0G2K8Q8, D3ZFQ8, P10888, Q6PCU0, P15999, D3ZZ21, Q6PDU7, Q6QI09, Q0QEP3, Q06647, F1LPG5, Q2XTA8, P21913, P29419, P21571, F1LP05	179	237	9021	4.46553	9.30094e-06	7.75082e-07	6.38489e-07
rno04260:Cardiac muscle contraction	13	5.41667	1.33971e-07	A0A0G2K8Q8, D3ZFQ8, P11507, Q91XN6, P10888, Q63607, Q68FY0, A0A0G2JX64, A0A0G2JSQ4, Q91XN7, D3ZYX8, Q63377, Q7TQ16, Q6AZ25, Q923Z2, P68035, B2RYX1, P07340, A0A096MJI9, A0A0G2K7F7, P04692, P06685, P06687, B2RYT5	179	88	9021	7.44496	3.26884e-05	2.51454e-06	2.0714e-06
rno00680:Methane metabolism	8	3.33333	6.58535e-07	Q52KS1, Q6PCU3, P04764, Q5BJ93, P47860, Q5EB49, A0A0G2K931, A0A0G2KBC7, B0BNE5, A0A0G2K3Q6, A0A0A0MXY5, E9PSV5, A0A0G2KAC0, P47858, Q68FU2, P07323, P09117, P25113, A0A0G2QC57, C7C5T2	179	27	9021	14.9323	0.00016067	1.14773e-05	9.45468e-06
rno04723:Retrograde endocannabinoid signaling	15	6.25	1.52446e-06	P54313, P04897, P54311, Q45QL8, Q45QL6, D4A565, Q66HF1, D3ZZ54, Q45QL0, Q45QN0, F1LXA0, A9LRS8, D4A3V2, Q5EEY4, Q5EEY3, M0RAX4, Q62634, Q45QK6, G3V8K2, P59215, D3ZZ21, O35458, P62882, F1LPG5, M0RBJ0, Q2XTA8	179	151	9021	5.00629	0.000371898	2.47978e-05	2.04277e-05
rno00020:Citrate cycle (TCA cycle)	8	3.33333	1.8242e-06	P52873, A0A0G2JTL5, P49432, Q4FZZ4, P26284, Q68FX0, Q9ER34, A0A0G2JW90, G3V6P2, P08461, Q01205, P21913, D0VYQ0, A0A0G2KAM3, F7FKI5	179	31	9021	13.0056	0.000445006	2.7819e-05	2.29165e-05
rno04961:Endocrine and other factor-regulated calcium reabsorption	9	3.75	1.84466e-05	A0A140TAH5, P84092, Q63377, P11442, P08082, P07340, P62944, Q3ZB97, A0A096MJI9, P06685, F1M779, P06687, P21575	179	59	9021	7.68762	0.0044909	0.000264763	0.000218104
rno04727:GABAergic synapse	10	4.16667	7.22993e-05	P54313, M0RAX4, P09606, Q63633, P54311, P04897, Q45QK6, Q45QL8, Q45QL6, G3V8K2, P59215, D3ZZ54, Q45QL0, D3ZGI9, Q45QN0, O35458, P62882, M0RBJ0, F1LNP4, Q5EEY4, Q5EEY3	179	91	9021	5.53809	0.017487	0.000980058	0.000807343
rno04932:Non-alcoholic fatty liver disease	13	5.41667	7.77846e-05	A0A0G2K8Q8, D3ZFQ8, P10888, Q68FY0, D4A565, Q66HF1, D3ZZ21, D3ZYX8, Q7TQ16, F1LXA0, F1LPG5, Q2XTA8, P21913, B2RYX1, D4A3V2, B2RYT5	179	161	9021	4.06929	0.0188012	0.000980533	0.000807735
rno04724:Glutamatergic synapse	11	4.58333	8.03716e-05	P54313, P09606, P54311, P04897, Q45QL8, Q45QL6, A0A0G2K611, D3ZZ54, Q45QL0, Q45QN0, A9LRS8, P63329, Q5EEY4, Q5EEY3, A0A0G2KAS7, M0RAX4, Q62634, Q45QK6, G3V8K2, P59215, G3V846, P62882, A0A0G2JSU1, M0RBJ0, P24942	179	114	9021	4.86283	0.0194204	0.000980533	0.000807735
rno05034:Alcoholism	13	5.41667	0.000191717	P54313, M0RAX4, P04897, P54311, P0DP31, K7S2S2, P02262, P62804, Q45QK6, Q45QL8, Q45QL6, G3V8K2, P59215, D3ZZ54, Q45QL0, Q45QN0, P62882, G3V9Z3, M0RBJ0, P21396, Q5EEY4, Q5EEY3, B2GV33	179	177	9021	3.70145	0.0457059	0.00222757	0.001835
rno04962:Vasopressin-regulated water reabsorption	7	2.91667	0.000205449	A0A096MIX4, Q62698, A0A096MIY2, Q9WUW2, P28023, A0A0G2K428, Q78P75, P63170, D4A8U7, P63045, Q5D023, A0A0G2JUC7, A0A096MKA1, Q6AYH5, Q5XI73	179	44	9021	8.01765	0.0488987	0.00227862	0.00187706
rno04728:Dopaminergic synapse	11	4.58333	0.000271552	P54313, M0RAX4, P54311, P04897, P0DP31, Q45QK6, Q45QL8, Q45QL6, G3V8K2, P59215, D3ZZ54, Q45QL0, Q45QN0, P63331, P62882, M0RBJ0, G3V9Z3, P63329, P21396, Q5EEY4, Q5EEY3, B2GV33	179	132	9021	4.19972	0.0641196	0.00288081	0.00237312
rno04022:cGMP-PKG signaling pathway	12	5	0.000550359	Q9Z2L0, P11507, P04897, P0DP31, P81155, Q05962, Q63377, A0A0G2JSR0, Q45QN0, P07340, P63329, A0A096MJI9, Q5EEY4, P06685, Q9R1Z0, Q5EEY3, P06687, Q6P9Y4	179	171	9021	3.53661	0.125694	0.00559531	0.00460925
rno05100:Bacterial invasion of epithelial cells	8	3.33333	0.000777857	Q9WU34, A0A0U1RRW2, A0A0U1RRQ5, A0A0U1RRT8, B5DFG5, A0A0U1RS01, P11442, P08082, D4A6H8, B2RZ72, B2GV73, F1LMH0, F1M779, P21575	179	77	9021	5.23602	0.172934	0.00759188	0.00625397
rno05132:Salmonella infection	14	5.83333	0.00152967	A0A096MIX4, Q62698, P09527, A0A096MIY2, P28023, A0A0G2K428, Q78P75, P63170, A0A0G2K930, P35465, P68370, D4A8U7, B4F7C2, Q5D023, P63322, B2RZ72, A0A0G2JUC7, B2GV73, Q6AYH5, A0A096MKA1, P85108, P62963	179	254	9021	2.77777	0.311697	0.0143554	0.0118256
rno04066:HIF-1 signaling pathway	9	3.75	0.00182546	P47860, Q4FZZ4, P26284, P16617, A0A0G2KBC7, P05708, A0A0G2JW90, A0A0A0MXY5, P47858, M0RAQ6, A0A0G2KAM3, F7FKI5, P09117, Q52KS1, Q6PCU3, P04764, Q5BJ93, P49432, Q5EB49, A0A0G2K3Q6, A0A096MJL6, O35917, O35918, P07323, A0A0G2QC57, C7C5T2	179	114	9021	3.97868	0.359701	0.0164968	0.0135895
rno00620:Pyruvate metabolism	6	2.5	0.00201331	P52873, A0A0G2JTL5, Q2QAI2, F1LN88, P49432, Q4FZZ4, P26284, P11884, P11980, A0A0G2JW90, P08461, A0A0G2KAM3, F7FKI5, M0R6F2, A0A0G2JVG3, F1LSP2	179	46	9021	6.57348	0.38844	0.0175446	0.0144527
rno05032:Morphine addiction	8	3.33333	0.00221341	P54313, M0RAX4, P54311, P04897, Q45QK6, Q45QL8, Q45QL6, G3V8K2, P59215, D3ZZ54, Q45QL0, Q45QN0, O35458, P62882, M0RBJ0, Q5EEY4, Q5EEY3	179	92	9021	4.38232	0.417642	0.0182912	0.0150678
rno05017:Spinocerebellar ataxia	10	4.16667	0.00225373	Q9Z2L0, P11507, P28075, P81155, P28073, Q05962, P18420, F1MA36, G3V7Q6, A0A0G2JSR0, P34064, Q6P9V6, Q9QWN8, Q9R1Z0, Q6P9Y4	179	145	9021	3.47563	0.423356	0.0182912	0.0150678
rno05230:Central carbon metabolism in cancer	7	2.91667	0.00232388	Q52KS1, P47860, P49432, Q4FZZ4, P26284, A0A0G2KBC7, P05708, P11980, A0A0G2JW90, A0A0A0MXY5, P47858, O35917, M0RAQ6, A0A0G2KAM3, F7FKI5, O35918, A0A0G2JVG3, P25113, C7C5T2	179	69	9021	5.1127	0.433165	0.0182912	0.0150678
rno04261:Adrenergic signaling in cardiomyocytes	10	4.16667	0.00259054	P11507, P04897, P0DP31, Q91XN6, Q63607, A0A0G2JX64, A0A0G2JSQ4, Q91XN7, Q63377, Q45QN0, P63331, Q6AZ25, Q923Z2, P68035, P07340, A0A096MJI9, A0A0G2K7F7, P04692, Q5EEY4, P06685, Q5EEY3, P06687	179	148	9021	3.40518	0.468957	0.0197529	0.0162719
rno04144:Endocytosis	14	5.83333	0.0030756	D4A404, P09527, D4A2Q3, D4A4S3, Q3T1K5, A0A0G2K930, A0A140TAH5, F1LMX1, P84092, P11442, P08082, B2RZ72, O88339, D3ZFY7, F1M779, D4A4P1, D3ZUW0, A0A140TAC3, Q5HZA7, O08839, P84083, B2GV73, P62944, Q3ZB97, P63018, P21575	179	275	9021	2.56565	0.52839	0.0227302	0.0187244
rno04713:Circadian entrainment	8	3.33333	0.00316732	P54313, M0RAX4, P54311, P04897, P0DP31, Q45QK6, Q45QL8, Q45QL6, G3V8K2, P59215, D3ZZ54, Q45QL0, Q45QN0, P62882, M0RBJ0, Q5EEY4, Q5EEY3	179	98	9021	4.11401	0.538859	0.0227302	0.0187244
rno04922:Glucagon signaling pathway	8	3.33333	0.00440782	Q52KS1, P0DP31, P47860, P49432, Q4FZZ4, P26284, A0A0G2KBC7, P11980, A0A0G2JW90, A0A0A0MXY5, P47858, A0A0G2KAM3, P63329, F7FKI5, A0A0G2JVG3, P25113, C7C5T2	179	104	9021	3.87667	0.659686	0.0307288	0.0253135
rno00051:Fructose and mannose metabolism	5	2.08333	0.0052739	Q52KS1, Q6PCU3, P47860, A0A0G2KBC7, P05708, A0A0G2K3Q6, A0A0A0MXY5, P47858, O35917, M0RAQ6, O35918, P48500, P09117, A0A0G2QC57, C7C5T2	179	36	9021	6.99953	0.724795	0.0357453	0.029446
rno04911:Insulin secretion	7	2.91667	0.00654849	A0A0G2K3F2, D4A5W9, Q9WUW2, Q63377, P63045, F8WG75, P63012, Q2XTA5, P60881, P07340, A0A096MJI9, P06685, P06687	179	85	9021	4.15031	0.798726	0.0423812	0.0349124
rno05170:Human immunodeficiency virus 1 infection	12	5	0.00660035	P54313, M0RAX4, P54311, P04897, P0DP31, Q45QK6, P45592, Q45QL8, Q45QL6, P35465, G3V8K2, P59215, D3ZZ54, Q45QL0, Q45QN0, P62882, P18418, M0RBJ0, P63329, Q5EEY4, Q5EEY3	179	234	9021	2.58444	0.801273	0.0423812	0.0349124
rno04964:Proximal tubule bicarbonate reclamation	4	1.66667	0.00882744	P07340, A0A096MJI9, P06685, Q63377, P06687	179	22	9021	9.16303	0.885073	0.0552281	0.0454952
rno04726:Serotonergic synapse	8	3.33333	0.0108041	P54313, M0RAX4, P54311, P04897, Q45QK6, Q45QL8, Q45QL6, G3V8K2, P59215, D3ZZ54, Q45QL0, Q45QN0, P62882, M0RBJ0, G3V9Z3, P21396, Q5EEY4, Q5EEY3, B2GV33	179	123	9021	3.27783	0.929387	0.0659051	0.0542907
rno04973:Carbohydrate digestion and absorption	5	2.08333	0.0125488	O35917, M0RAQ6, P07340, O35918, A0A096MJI9, P05708, P06685, Q63377, P06687	179	46	9021	5.4779	0.954099	0.0746804	0.0615195
rno00710:Carbon fixation in photosynthetic organisms	4	1.66667	0.0156038	Q6PCU3, A0A096MJL6, P00507, P16617, P48500, A0A0G2K3Q6, P09117, A0A0G2QC57	179	27	9021	7.46617	0.978449	0.0906509	0.0746755
rno04971:Gastric acid secretion	6	2.5	0.0160578	P04897, P0DP31, P07340, A0A096MJI9, Q5EEY4, P06685, Q63377, Q5EEY3, P06687, Q45QN0	179	75	9021	4.03173	0.980743	0.0911185	0.0750607
rno00330:Arginine and proline metabolism	5	2.08333	0.0178167	P00507, Q5BJT9, P25809, Q2QAI2, F1LN88, G3V9Z3, P11884, P21396, M0R6F2, F1LSP2, B2GV33, P07335	179	51	9021	4.94085	0.987555	0.0988015	0.0813898
rno04371:Apelin signaling pathway	8	3.33333	0.0186332	P54313, M0RAX4, P54311, P04897, P0DP31, Q45QK6, Q45QL8, Q45QL6, G3V8K2, D3ZZ54, Q45QL0, Q45QN0, P62882, M0RBJ0, Q6XVN8, Q5EEY4, Q5EEY3	179	137	9021	2.94287	0.989841	0.101033	0.0832282
rno04011:MAPK signaling pathway - yeast	4	1.66667	0.0207483	P54311, P62260, Q45QL8, P35465, D3ZAP9	179	30	9021	6.71955	0.993999	0.107714	0.088732
rno00030:Pentose phosphate pathway	4	1.66667	0.0207483	Q52KS1, Q6PCU3, A0A0A0MXY5, P47858, P47860, A0A0G2KBC7, A0A0G2K3Q6, P09117, Q9EQS0, A0A0G2QC57, C7C5T2	179	30	9021	6.71955	0.993999	0.107714	0.088732
rno04970:Salivary secretion	6	2.5	0.021707	P63045, P0DP31, Q9WUW2, P07340, A0A096MJI9, P06685, Q63377, P06687	179	81	9021	3.73309	0.995275	0.110344	0.0908979
rno03018:RNA degradation	6	2.5	0.0227592	Q52KS1, P04764, Q5BJ93, P47860, A0A0G2JZS2, Q5EB49, A0A0G2KBC7, A0A0A0MXY5, P47858, P48721, F1M953, P07323, C7C5T2, Q9EPH8	179	82	9021	3.68756	0.996366	0.113332	0.0933592
rno04725:Cholinergic synapse	7	2.91667	0.0241638	P54313, M0RAX4, P54311, P04897, Q45QK6, Q45QL8, Q45QL6, G3V8K2, P59215, D3ZZ54, Q45QL0, Q45QN0, P62882, M0RBJ0, Q5EEY4, Q5EEY3	179	113	9021	3.12192	0.997442	0.11792	0.0971386
rno04613:Neutrophil extracellular trap formation	9	3.75	0.0301761	Q9Z2L0, K7S2S2, P02262, P62804, P81155, Q05962, D3ZCR3, Q9R1Z0, A0A0G2JSR0, Q6P9Y4	179	185	9021	2.45173	0.999434	0.144372	0.118929
rno04919:Thyroid hormone signaling pathway	7	2.91667	0.0358621	Q52KS1, A0A0A0MXY5, P11507, P47858, P47860, A0A0G2KBC7, P07340, A0A096MJI9, P06685, Q63377, P06687, C7C5T2	179	124	9021	2.84497	0.999865	0.168276	0.138621
rno04960:Aldosterone-regulated sodium reabsorption	4	1.66667	0.0384717	P07340, A0A096MJI9, P06685, Q63377, P06687	179	38	9021	5.30491	0.99993	0.177115	0.145902
rno04926:Relaxin signaling pathway	7	2.91667	0.0408845	P54313, M0RAX4, P54311, P04897, Q45QK6, Q45QL8, Q45QL6, G3V8K2, P59215, D3ZZ54, Q45QL0, Q45QN0, P62882, M0RBJ0, Q5EEY4, Q5EEY3	179	128	9021	2.75607	0.999962	0.184737	0.152181
rno04217:Necroptosis	8	3.33333	0.0435639	Q9Z2L0, P09606, A0A0G2K1P0, K7S2S2, P02262, P81155, Q05962, D3ZCR3, Q9R1Z0, A0A0G2JSR0, P10111, Q6P9Y4	179	164	9021	2.45837	0.999981	0.193265	0.159206
rno04216:Ferroptosis	4	1.66667	0.0494741	Q6XVN8, P81155, Q9R1Z0, A0A0G2JSR0, P13852	179	42	9021	4.79968	0.999996	0.215566	0.177577
rno04918:Thyroid hormone synthesis	5	2.08333	0.0558063	P07340, P35565, A0A096MJI9, P06685, Q63377, P06687	179	73	9021	3.45183	0.999999	0.23889	0.196791
rno05163:Human cytomegalovirus infection	10	4.16667	0.0568627	P54313, M0RAX4, P54311, P04897, P0DP31, Q45QK6, Q45QL8, Q45QL6, G3V8K2, P59215, D3ZZ54, Q45QL0, Q45QN0, P62882, P18418, M0RBJ0, P63329, Q5EEY4, Q5EEY3	179	248	9021	2.03212	0.999999	0.239216	0.197059
rno03050:Proteasome	4	1.66667	0.0651315	P28075, P34064, P28073, Q6P9V6, P18420, G3V7Q6	179	47	9021	4.28908	1	0.269357	0.221889
rno04138:Autophagy - yeast	5	2.08333	0.0679086	P63331, P09527, B2RZ72, A0A0G2K930, B2GV73, P54921	179	78	9021	3.23055	1	0.276162	0.227494
rno00280:Valine, leucine and isoleucine degradation	4	1.66667	0.0981935	Q2QAI2, F1LN88, B2GV06, B0BMW2, F1LU71, P11884, O70351, M0R6F2, F1LSP2	179	56	9021	3.59976	1	0.392774	0.323556
Analysis type: Gene Ontology: Biological Process (GO:BP) - Metascape
GroupID	Category	Term	Description	LogP	Log(q-value)	InTerm_InList	Genes	Symbols
1_Summary	GO Biological Processes	GO:0006091	generation of precursor metabolites and energy	-22.2668	-18.0652	45/453	24191,24333,24334,24642,24644,25017,25058,25630,25739,29445,29483,54322,60416,65152,65262,79250,81654,83688,84027,94173,94271,114766,116550,117273,140608,192241,289950,293991,294362,295922,297990,298596,298762,299201,299739,300047,300677,301011,301458,361596,497902,641434,685322,690163,690441,24468,25650,303179,685232	Aldoc,Eno1,Eno2,Pgam1,Pgk1,Myo5a,Hk1,Pkm,Pygb,Cox4i1,Slc1a3,Cox6c,Pfkp,Pfkm,Atp5f1a,Aco2,Dlat,Taldo1,Gsk3b,Idh3b,Atp5pf,Phb2,Atp5f1c,Rhoa,Atp5me,Atp5po,Pdhb,Ndufb8,Cisd1,Mtch2,Ndufb6,Sdhb,Cox7a2l,Dlst,Ndufa12,Cyc1,Atp5mg,Uqcrc1,Ndufs1,Idh2,Uqcrq,Atp5pd,Uqcr10,Oxct1,Atp5mf,Hspa8,Atp1b1,Guk1,Atp6v1a
1_Member	GO Biological Processes	GO:0006091	generation of precursor metabolites and energy	-22.2668	-18.0652	45/453	24191,24333,24334,24642,24644,25017,25058,25630,25739,29445,29483,54322,60416,65152,65262,79250,81654,83688,84027,94173,94271,114766,116550,117273,140608,192241,289950,293991,294362,295922,297990,298596,298762,299201,299739,300047,300677,301011,301458,361596,497902,641434,685322,690163,690441	Aldoc,Eno1,Eno2,Pgam1,Pgk1,Myo5a,Hk1,Pkm,Pygb,Cox4i1,Slc1a3,Cox6c,Pfkp,Pfkm,Atp5f1a,Aco2,Dlat,Taldo1,Gsk3b,Idh3b,Atp5pf,Phb2,Atp5f1c,Rhoa,Atp5me,Atp5po,Pdhb,Ndufb8,Cisd1,Mtch2,Ndufb6,Sdhb,Cox7a2l,Dlst,Ndufa12,Cyc1,Atp5mg,Uqcrc1,Ndufs1,Idh2,Uqcrq,Atp5pd,Uqcr10,Oxct1,Atp5mf
1_Member	GO Biological Processes	GO:0046034	ATP metabolic process	-19.3686	-15.4681	34/284	24191,24333,24334,24468,24642,24644,25058,25630,25650,29445,54322,60416,65152,65262,94271,116550,117273,140608,192241,293991,295922,297990,298762,299739,300047,300677,301011,301458,303179,497902,641434,685232,685322,690441	Aldoc,Eno1,Eno2,Hspa8,Pgam1,Pgk1,Hk1,Pkm,Atp1b1,Cox4i1,Cox6c,Pfkp,Pfkm,Atp5f1a,Atp5pf,Atp5f1c,Rhoa,Atp5me,Atp5po,Ndufb8,Mtch2,Ndufb6,Cox7a2l,Ndufa12,Cyc1,Atp5mg,Uqcrc1,Ndufs1,Guk1,Uqcrq,Atp5pd,Atp6v1a,Uqcr10,Atp5mf
1_Member	GO Biological Processes	GO:0009060	aerobic respiration	-19.1443	-15.4198	28/179	29445,54322,65262,79250,81654,94173,94271,116550,117273,140608,192241,289950,293991,295922,297990,298596,298762,299201,299739,300047,300677,301011,301458,361596,497902,641434,685322,690441	Cox4i1,Cox6c,Atp5f1a,Aco2,Dlat,Idh3b,Atp5pf,Atp5f1c,Rhoa,Atp5me,Atp5po,Pdhb,Ndufb8,Mtch2,Ndufb6,Sdhb,Cox7a2l,Dlst,Ndufa12,Cyc1,Atp5mg,Uqcrc1,Ndufs1,Idh2,Uqcrq,Atp5pd,Uqcr10,Atp5mf
1_Member	GO Biological Processes	GO:0045333	cellular respiration	-18.3427	-14.7432	30/227	29445,29483,54322,65262,79250,81654,94173,94271,116550,117273,140608,192241,289950,293991,294362,295922,297990,298596,298762,299201,299739,300047,300677,301011,301458,361596,497902,641434,685322,690441	Cox4i1,Slc1a3,Cox6c,Atp5f1a,Aco2,Dlat,Idh3b,Atp5pf,Atp5f1c,Rhoa,Atp5me,Atp5po,Pdhb,Ndufb8,Cisd1,Mtch2,Ndufb6,Sdhb,Cox7a2l,Dlst,Ndufa12,Cyc1,Atp5mg,Uqcrc1,Ndufs1,Idh2,Uqcrq,Atp5pd,Uqcr10,Atp5mf
1_Member	GO Biological Processes	GO:0015980	energy derivation by oxidation of organic compounds	-17.0181	-13.5947	33/315	25739,29445,29483,54322,65152,65262,79250,81654,84027,94173,94271,116550,117273,140608,192241,289950,293991,294362,295922,297990,298596,298762,299201,299739,300047,300677,301011,301458,361596,497902,641434,685322,690441	Pygb,Cox4i1,Slc1a3,Cox6c,Pfkm,Atp5f1a,Aco2,Dlat,Gsk3b,Idh3b,Atp5pf,Atp5f1c,Rhoa,Atp5me,Atp5po,Pdhb,Ndufb8,Cisd1,Mtch2,Ndufb6,Sdhb,Cox7a2l,Dlst,Ndufa12,Cyc1,Atp5mg,Uqcrc1,Ndufs1,Idh2,Uqcrq,Atp5pd,Uqcr10,Atp5mf
1_Member	GO Biological Processes	GO:0006119	oxidative phosphorylation	-14.5449	-11.2464	21/133	29445,54322,65262,94271,116550,117273,140608,192241,293991,295922,297990,298762,299739,300047,300677,301011,301458,497902,641434,685322,690441	Cox4i1,Cox6c,Atp5f1a,Atp5pf,Atp5f1c,Rhoa,Atp5me,Atp5po,Ndufb8,Mtch2,Ndufb6,Cox7a2l,Ndufa12,Cyc1,Atp5mg,Uqcrc1,Ndufs1,Uqcrq,Atp5pd,Uqcr10,Atp5mf
1_Member	GO Biological Processes	GO:0022904	respiratory electron transport chain	-9.09958	-6.6667	14/101	29445,29483,54322,293991,295922,297990,298596,298762,299739,300047,301011,301458,497902,685322	Cox4i1,Slc1a3,Cox6c,Ndufb8,Mtch2,Ndufb6,Sdhb,Cox7a2l,Ndufa12,Cyc1,Uqcrc1,Ndufs1,Uqcrq,Uqcr10
1_Member	GO Biological Processes	GO:0042775	mitochondrial ATP synthesis coupled electron transport	-8.41103	-6.06677	12/78	29445,54322,293991,295922,297990,298762,299739,300047,301011,301458,497902,685322	Cox4i1,Cox6c,Ndufb8,Mtch2,Ndufb6,Cox7a2l,Ndufa12,Cyc1,Uqcrc1,Ndufs1,Uqcrq,Uqcr10
1_Member	GO Biological Processes	GO:0042773	ATP synthesis coupled electron transport	-8.28127	-5.94892	12/80	29445,54322,293991,295922,297990,298762,299739,300047,301011,301458,497902,685322	Cox4i1,Cox6c,Ndufb8,Mtch2,Ndufb6,Cox7a2l,Ndufa12,Cyc1,Uqcrc1,Ndufs1,Uqcrq,Uqcr10
1_Member	GO Biological Processes	GO:0022900	electron transport chain	-7.78133	-5.50402	14/127	29445,29483,54322,293991,295922,297990,298596,298762,299739,300047,301011,301458,497902,685322	Cox4i1,Slc1a3,Cox6c,Ndufb8,Mtch2,Ndufb6,Sdhb,Cox7a2l,Ndufa12,Cyc1,Uqcrc1,Ndufs1,Uqcrq,Uqcr10
1_Member	GO Biological Processes	GO:0019646	aerobic electron transport chain	-6.91046	-4.7217	10/68	29445,54322,293991,297990,298762,300047,301011,301458,497902,685322	Cox4i1,Cox6c,Ndufb8,Ndufb6,Cox7a2l,Cyc1,Uqcrc1,Ndufs1,Uqcrq,Uqcr10
2_Summary	GO Biological Processes	GO:0099003	vesicle-mediated transport in synapse	-17.0527	-13.5947	31/272	24242,24468,24804,24923,24949,25012,25400,25558,25716,29177,29693,29704,79130,81022,83612,84027,89816,116561,116563,116638,116657,116728,116743,117028,140670,140673,140694,171026,259269,361651,499903,24380,24957,29431,29542,58945,117556,24674,25017,29364,29448,29495,64202,79434,81664,81757,83427,317396,29483,25578,361069,502776,60334,65152,94271,363875,690163,171116,296966,312890,83572,29271	Calm1,Hspa8,Syp,Stx1b,Syn1,Snap25,Camk2a,Stxbp1,Syt1,Hpca,Atp2a2,Pacsin1,Dnajc5,Stxbp5,Slc32a1,Gsk3b,Picalm,Cltb,Ap2m1,Slc17a7,Cplx2,Septin5,Sh3gl2,Bin1,Ap2b1,Napa,Dnm1,Akap5,Erc2,Prrt2,Napb,Gad2,Glul,Pak1,Pebp1,Dynll1,Sv2b,Ppp3ca,Myo5a,Cd47,Rab7a,Dlg4,Calr,Rab11b,Gnai2,Rala,Rack1,Ubqln2,Slc1a3,Ywhaz,Dmtn,Scrn1,Ensa,Pfkm,Atp5pf,Rac1,Oxct1,Opa1,Chchd3,Gdap1,Pafah1b1,Cfl1
2_Member	GO Biological Processes	GO:0099003	vesicle-mediated transport in synapse	-17.0527	-13.5947	31/272	24242,24468,24804,24923,24949,25012,25400,25558,25716,29177,29693,29704,79130,81022,83612,84027,89816,116561,116563,116638,116657,116728,116743,117028,140670,140673,140694,171026,259269,361651,499903	Calm1,Hspa8,Syp,Stx1b,Syn1,Snap25,Camk2a,Stxbp1,Syt1,Hpca,Atp2a2,Pacsin1,Dnajc5,Stxbp5,Slc32a1,Gsk3b,Picalm,Cltb,Ap2m1,Slc17a7,Cplx2,Septin5,Sh3gl2,Bin1,Ap2b1,Napa,Dnm1,Akap5,Erc2,Prrt2,Napb
2_Member	GO Biological Processes	GO:0099504	synaptic vesicle cycle	-16.4666	-13.1101	29/244	24242,24468,24804,24923,24949,25012,25400,25558,25716,29693,29704,79130,81022,83612,84027,89816,116561,116563,116638,116657,116728,116743,117028,140670,140673,140694,259269,361651,499903	Calm1,Hspa8,Syp,Stx1b,Syn1,Snap25,Camk2a,Stxbp1,Syt1,Atp2a2,Pacsin1,Dnajc5,Stxbp5,Slc32a1,Gsk3b,Picalm,Cltb,Ap2m1,Slc17a7,Cplx2,Septin5,Sh3gl2,Bin1,Ap2b1,Napa,Dnm1,Erc2,Prrt2,Napb
2_Member	GO Biological Processes	GO:0001505	regulation of neurotransmitter levels	-11.5449	-8.6443	25/276	24242,24380,24804,24923,24949,24957,25012,25400,25558,25716,29431,29542,29693,58945,81022,84027,116561,116638,116657,116728,117556,140673,259269,361651,499903	Calm1,Gad2,Syp,Stx1b,Syn1,Glul,Snap25,Camk2a,Stxbp1,Syt1,Pak1,Pebp1,Atp2a2,Dynll1,Stxbp5,Gsk3b,Cltb,Slc17a7,Cplx2,Septin5,Sv2b,Napa,Erc2,Prrt2,Napb
2_Member	GO Biological Processes	GO:0060627	regulation of vesicle-mediated transport	-10.6336	-7.90915	36/620	24242,24468,24674,24804,24923,24949,25017,25558,25716,29177,29364,29448,29495,29693,29704,64202,79130,79434,81022,81664,81757,83427,84027,89816,116563,116638,116657,116728,116743,117028,140670,140694,171026,317396,361651,499903	Calm1,Hspa8,Ppp3ca,Syp,Stx1b,Syn1,Myo5a,Stxbp1,Syt1,Hpca,Cd47,Rab7a,Dlg4,Atp2a2,Pacsin1,Calr,Dnajc5,Rab11b,Stxbp5,Gnai2,Rala,Rack1,Gsk3b,Picalm,Ap2m1,Slc17a7,Cplx2,Septin5,Sh3gl2,Bin1,Ap2b1,Dnm1,Akap5,Ubqln2,Prrt2,Napb
2_Member	GO Biological Processes	GO:0006836	neurotransmitter transport	-10.3811	-7.7477	23/262	24242,24804,24923,24949,25012,25400,25558,25716,29431,29483,29693,81022,83612,84027,116561,116638,116657,116728,117556,140673,259269,361651,499903	Calm1,Syp,Stx1b,Syn1,Snap25,Camk2a,Stxbp1,Syt1,Pak1,Slc1a3,Atp2a2,Stxbp5,Slc32a1,Gsk3b,Cltb,Slc17a7,Cplx2,Septin5,Sv2b,Napa,Erc2,Prrt2,Napb
2_Member	GO Biological Processes	GO:0140029	exocytic process	-9.65335	-7.15073	14/92	24923,25012,25400,25558,25578,25716,81022,116657,116728,140673,259269,361069,361651,499903	Stx1b,Snap25,Camk2a,Stxbp1,Ywhaz,Syt1,Stxbp5,Cplx2,Septin5,Napa,Erc2,Dmtn,Prrt2,Napb
2_Member	GO Biological Processes	GO:0007269	neurotransmitter secretion	-9.09743	-6.6667	19/204	24242,24804,24923,24949,25012,25400,25558,25716,29431,29693,81022,84027,116561,116657,116728,140673,259269,361651,499903	Calm1,Syp,Stx1b,Syn1,Snap25,Camk2a,Stxbp1,Syt1,Pak1,Atp2a2,Stxbp5,Gsk3b,Cltb,Cplx2,Septin5,Napa,Erc2,Prrt2,Napb
2_Member	GO Biological Processes	GO:0099643	signal release from synapse	-9.09743	-6.6667	19/204	24242,24804,24923,24949,25012,25400,25558,25716,29431,29693,81022,84027,116561,116657,116728,140673,259269,361651,499903	Calm1,Syp,Stx1b,Syn1,Snap25,Camk2a,Stxbp1,Syt1,Pak1,Atp2a2,Stxbp5,Gsk3b,Cltb,Cplx2,Septin5,Napa,Erc2,Prrt2,Napb
2_Member	GO Biological Processes	GO:0006887	exocytosis	-8.54935	-6.18027	26/411	24242,24674,24804,24923,25012,25017,25400,25558,25578,25716,29431,29448,29693,79434,81022,81664,81757,84027,116657,116728,140673,259269,361069,361651,499903,502776	Calm1,Ppp3ca,Syp,Stx1b,Snap25,Myo5a,Camk2a,Stxbp1,Ywhaz,Syt1,Pak1,Rab7a,Atp2a2,Rab11b,Stxbp5,Gnai2,Rala,Gsk3b,Cplx2,Septin5,Napa,Erc2,Dmtn,Prrt2,Napb,Scrn1
2_Member	GO Biological Processes	GO:0016079	synaptic vesicle exocytosis	-8.51701	-6.16052	16/152	24242,24804,24923,25012,25400,25558,25716,29693,81022,84027,116657,116728,140673,259269,361651,499903	Calm1,Syp,Stx1b,Snap25,Camk2a,Stxbp1,Syt1,Atp2a2,Stxbp5,Gsk3b,Cplx2,Septin5,Napa,Erc2,Prrt2,Napb
2_Member	GO Biological Processes	GO:0045055	regulated exocytosis	-8.06489	-5.7664	21/288	24242,24674,24804,24923,25012,25400,25558,25578,25716,29693,79434,81022,81664,84027,116657,116728,140673,259269,361069,361651,499903	Calm1,Ppp3ca,Syp,Stx1b,Snap25,Camk2a,Stxbp1,Ywhaz,Syt1,Atp2a2,Rab11b,Stxbp5,Gnai2,Gsk3b,Cplx2,Septin5,Napa,Erc2,Dmtn,Prrt2,Napb
2_Member	GO Biological Processes	GO:0016082	synaptic vesicle priming	-7.32355	-4.82871	5/24	24923,25012,25558,259269,499903	Stx1b,Snap25,Stxbp1,Erc2,Napb
2_Member	GO Biological Processes	GO:0023061	signal release	-7.223	-5.00819	30/613	24242,24674,24804,24923,24949,24957,25012,25017,25400,25558,25578,25716,29431,29693,58945,60334,65152,79434,81022,84027,94271,116561,116657,116728,140673,259269,361651,363875,499903,690163	Calm1,Ppp3ca,Syp,Stx1b,Syn1,Glul,Snap25,Myo5a,Camk2a,Stxbp1,Ywhaz,Syt1,Pak1,Atp2a2,Dynll1,Ensa,Pfkm,Rab11b,Stxbp5,Gsk3b,Atp5pf,Cltb,Cplx2,Septin5,Napa,Erc2,Prrt2,Rac1,Napb,Oxct1
2_Member	GO Biological Processes	GO:0010807	regulation of synaptic vesicle priming	-6.61703	-4.45684	5/10	24923,25558,81022,140673,499903	Stx1b,Stxbp1,Stxbp5,Napa,Napb
2_Member	GO Biological Processes	GO:0031629	synaptic vesicle fusion to presynaptic active zone membrane	-5.3631	-3.34335	5/22	24923,25012,25716,116657,361651	Stx1b,Snap25,Syt1,Cplx2,Prrt2
2_Member	GO Biological Processes	GO:0099500	vesicle fusion to plasma membrane	-5.26071	-3.26052	5/23	24923,25012,25716,116657,361651	Stx1b,Snap25,Syt1,Cplx2,Prrt2
2_Member	GO Biological Processes	GO:0048499	synaptic vesicle membrane organization	-4.9818	-3.04503	5/26	24923,25012,25716,116657,361651	Stx1b,Snap25,Syt1,Cplx2,Prrt2
2_Member	GO Biological Processes	GO:0022406	membrane docking	-4.85338	-2.98017	9/90	24242,24923,25400,25558,25716,29448,29693,116657,116728	Calm1,Stx1b,Camk2a,Stxbp1,Syt1,Rab7a,Atp2a2,Cplx2,Septin5
2_Member	GO Biological Processes	GO:0048791	calcium ion-regulated exocytosis of neurotransmitter	-4.66656	-2.821	5/22	24923,25012,25558,25716,29693	Stx1b,Snap25,Stxbp1,Syt1,Atp2a2
2_Member	GO Biological Processes	GO:0140056	organelle localization by membrane tethering	-4.37395	-2.57478	8/80	24242,24923,25400,25558,25716,29693,116657,116728	Calm1,Stx1b,Camk2a,Stxbp1,Syt1,Atp2a2,Cplx2,Septin5
2_Member	GO Biological Processes	GO:0046928	regulation of neurotransmitter secretion	-4.1341	-2.37812	10/137	24242,24804,24923,25400,25558,25716,29693,81022,84027,116657	Calm1,Syp,Stx1b,Camk2a,Stxbp1,Syt1,Atp2a2,Stxbp5,Gsk3b,Cplx2
2_Member	GO Biological Processes	GO:0017157	regulation of exocytosis	-4.06386	-2.32467	14/261	24242,24674,24804,24923,25017,25558,25716,29448,29693,81022,81664,81757,84027,116728	Calm1,Ppp3ca,Syp,Stx1b,Myo5a,Stxbp1,Syt1,Rab7a,Atp2a2,Stxbp5,Gnai2,Rala,Gsk3b,Septin5
2_Member	GO Biological Processes	GO:0048284	organelle fusion	-3.95302	-2.23519	10/144	24923,25012,25558,25716,29448,116657,171116,296966,312890,361651	Stx1b,Snap25,Stxbp1,Syt1,Rab7a,Cplx2,Opa1,Chchd3,Gdap1,Prrt2
2_Member	GO Biological Processes	GO:0016050	vesicle organization	-3.80727	-2.1435	12/293	24923,25012,25716,29448,29495,83572,116561,116563,116638,116657,140694,361651	Stx1b,Snap25,Syt1,Rab7a,Dlg4,Pafah1b1,Cltb,Ap2m1,Slc17a7,Cplx2,Dnm1,Prrt2
2_Member	GO Biological Processes	GO:0051588	regulation of neurotransmitter transport	-3.73611	-2.05171	10/153	24242,24804,24923,25400,25558,25716,29693,81022,84027,116657	Calm1,Syp,Stx1b,Camk2a,Stxbp1,Syt1,Atp2a2,Stxbp5,Gsk3b,Cplx2
2_Member	GO Biological Processes	GO:0017156	calcium-ion regulated exocytosis	-3.70317	-2.02403	7/75	24674,24923,25012,25558,25716,29693,81664	Ppp3ca,Stx1b,Snap25,Stxbp1,Syt1,Atp2a2,Gnai2
2_Member	GO Biological Processes	GO:0031630	regulation of synaptic vesicle fusion to presynaptic active zone membrane	-3.63434	-2.0152	3/11	25716,116657,361651	Syt1,Cplx2,Prrt2
2_Member	GO Biological Processes	GO:1901632	regulation of synaptic vesicle membrane organization	-3.63434	-2.0152	3/11	25716,116657,361651	Syt1,Cplx2,Prrt2
2_Member	GO Biological Processes	GO:0048278	vesicle docking	-3.36924	-1.74169	6/61	24923,25400,25558,25716,116657,116728	Stx1b,Camk2a,Stxbp1,Syt1,Cplx2,Septin5
2_Member	GO Biological Processes	GO:0031915	positive regulation of synaptic plasticity	-3.20859	-1.71287	3/15	25012,29271,116657	Snap25,Cfl1,Cplx2
2_Member	GO Biological Processes	GO:0031338	regulation of vesicle fusion	-3.00947	-1.44837	4/28	25558,25716,116657,361651	Stxbp1,Syt1,Cplx2,Prrt2
2_Member	GO Biological Processes	GO:0006906	vesicle fusion	-2.82548	-1.43946	6/107	24923,25012,25716,29448,116657,361651	Stx1b,Snap25,Syt1,Rab7a,Cplx2,Prrt2
2_Member	GO Biological Processes	GO:0090174	organelle membrane fusion	-2.744	-1.38377	6/111	24923,25012,25716,29448,116657,361651	Stx1b,Snap25,Syt1,Rab7a,Cplx2,Prrt2
2_Member	GO Biological Processes	GO:0061025	membrane fusion	-2.62106	-1.28929	7/158	24923,25012,25716,29448,116657,140673,361651	Stx1b,Snap25,Syt1,Rab7a,Cplx2,Napa,Prrt2
2_Member	GO Biological Processes	GO:2000300	regulation of synaptic vesicle exocytosis	-2.37092	-0.910488	6/95	24242,24804,25716,29693,81022,84027	Calm1,Syp,Syt1,Atp2a2,Stxbp5,Gsk3b
3_Summary	GO Biological Processes	GO:1902600	proton transmembrane transport	-13.7687	-10.5214	21/145	24211,24213,25017,25176,54322,59114,65262,85333,94271,114766,116550,116638,140608,192241,245959,291969,299971,300677,641434,685232,690441,25400,25578,29483,50558,65042,83529,83531,84027,171116,171139,252928,266777,295922,312890,24191,24333,24334,24465,24642,24644,25058,25630,29177,60416,65152,81654,117273,191575,289950,290029,299201,303179,24242,24672,24686,25012,25390,25576,25650,29598,29600,296…	Atp1a1,Atp1a3,Myo5a,Slc25a5,Cox6c,Slc9a3r1,Atp5f1a,Slc25a4,Atp5pf,Phb2,Atp5f1c,Slc17a7,Atp5me,Atp5po,Slc25a3,Atp6v0d1,Atp6v1c1,Atp5mg,Atp5pd,Atp6v1a,Atp5mf,Camk2a,Ywhaz,Slc1a3,Npepps,Sfxn3,Vdac1,Vdac2,Gsk3b,Opa1,Timm9,Timm13,Nptx1,Mtch2,Gdap1,Aldoc,Eno1,Eno2,Hprt1,Pgam1,Pgk1,Hk1,Pkm,Hpca,Pfkp,Pfkm,Dlat,Rhoa,Nme1,Pdhb,Pnp,Dlst,Guk1,Calm1,Ppp2ca,Prnp,Snap25,Atp1b3,Ywhah,Atp1b1,Atp2b1,Atp2b4,Atp2a2,…
3_Member	GO Biological Processes	GO:1902600	proton transmembrane transport	-13.7687	-10.5214	21/145	24211,24213,25017,25176,54322,59114,65262,85333,94271,114766,116550,116638,140608,192241,245959,291969,299971,300677,641434,685232,690441	Atp1a1,Atp1a3,Myo5a,Slc25a5,Cox6c,Slc9a3r1,Atp5f1a,Slc25a4,Atp5pf,Phb2,Atp5f1c,Slc17a7,Atp5me,Atp5po,Slc25a3,Atp6v0d1,Atp6v1c1,Atp5mg,Atp5pd,Atp6v1a,Atp5mf
3_Member	GO Biological Processes	GO:0006839	mitochondrial transport	-12.998	-9.79644	25/238	25176,25400,25578,29483,50558,65042,65262,83529,83531,84027,85333,94271,116550,140608,171116,171139,192241,245959,252928,266777,295922,300677,312890,641434,690441	Slc25a5,Camk2a,Ywhaz,Slc1a3,Npepps,Sfxn3,Atp5f1a,Vdac1,Vdac2,Gsk3b,Slc25a4,Atp5pf,Atp5f1c,Atp5me,Opa1,Timm9,Atp5po,Slc25a3,Timm13,Nptx1,Mtch2,Atp5mg,Gdap1,Atp5pd,Atp5mf
3_Member	GO Biological Processes	GO:0006163	purine nucleotide metabolic process	-11.3363	-8.5005	29/384	24191,24333,24334,24465,24642,24644,25058,25630,29177,60416,65152,65262,81654,94271,116550,117273,140608,171116,191575,192241,289950,290029,295922,299201,300677,303179,641434,685232,690441	Aldoc,Eno1,Eno2,Hprt1,Pgam1,Pgk1,Hk1,Pkm,Hpca,Pfkp,Pfkm,Atp5f1a,Dlat,Atp5pf,Atp5f1c,Rhoa,Atp5me,Opa1,Nme1,Atp5po,Pdhb,Pnp,Mtch2,Dlst,Atp5mg,Guk1,Atp5pd,Atp6v1a,Atp5mf
3_Member	GO Biological Processes	GO:0009150	purine ribonucleotide metabolic process	-11.3219	-8.5005	28/358	24191,24333,24334,24465,24642,24644,25058,25630,60416,65152,65262,81654,94271,116550,117273,140608,171116,191575,192241,289950,290029,295922,299201,300677,303179,641434,685232,690441	Aldoc,Eno1,Eno2,Hprt1,Pgam1,Pgk1,Hk1,Pkm,Pfkp,Pfkm,Atp5f1a,Dlat,Atp5pf,Atp5f1c,Rhoa,Atp5me,Opa1,Nme1,Atp5po,Pdhb,Pnp,Mtch2,Dlst,Atp5mg,Guk1,Atp5pd,Atp6v1a,Atp5mf
3_Member	GO Biological Processes	GO:0009259	ribonucleotide metabolic process	-10.7862	-7.99963	28/377	24191,24333,24334,24465,24642,24644,25058,25630,60416,65152,65262,81654,94271,116550,117273,140608,171116,191575,192241,289950,290029,295922,299201,300677,303179,641434,685232,690441	Aldoc,Eno1,Eno2,Hprt1,Pgam1,Pgk1,Hk1,Pkm,Pfkp,Pfkm,Atp5f1a,Dlat,Atp5pf,Atp5f1c,Rhoa,Atp5me,Opa1,Nme1,Atp5po,Pdhb,Pnp,Mtch2,Dlst,Atp5mg,Guk1,Atp5pd,Atp6v1a,Atp5mf
3_Member	GO Biological Processes	GO:0009144	purine nucleoside triphosphate metabolic process	-10.7482	-7.97798	15/92	24333,25630,65262,94271,116550,117273,140608,171116,191575,192241,300677,303179,641434,685232,690441	Eno1,Pkm,Atp5f1a,Atp5pf,Atp5f1c,Rhoa,Atp5me,Opa1,Nme1,Atp5po,Atp5mg,Guk1,Atp5pd,Atp6v1a,Atp5mf
3_Member	GO Biological Processes	GO:0072521	purine-containing compound metabolic process	-10.6412	-7.90915	29/410	24191,24333,24334,24465,24642,24644,25058,25630,29177,60416,65152,65262,81654,94271,116550,117273,140608,171116,191575,192241,289950,290029,295922,299201,300677,303179,641434,685232,690441	Aldoc,Eno1,Eno2,Hprt1,Pgam1,Pgk1,Hk1,Pkm,Hpca,Pfkp,Pfkm,Atp5f1a,Dlat,Atp5pf,Atp5f1c,Rhoa,Atp5me,Opa1,Nme1,Atp5po,Pdhb,Pnp,Mtch2,Dlst,Atp5mg,Guk1,Atp5pd,Atp6v1a,Atp5mf
3_Member	GO Biological Processes	GO:0098662	inorganic cation transmembrane transport	-10.5445	-7.87026	41/790	24211,24213,24242,24672,24686,25012,25017,25176,25390,25576,25650,29177,29483,29598,29600,29693,29753,54322,59114,65262,79125,83529,83629,85333,94271,114766,116550,116638,117028,140608,171116,171373,192241,245959,291969,299971,300677,306439,641434,685232,690441	Atp1a1,Atp1a3,Calm1,Ppp2ca,Prnp,Snap25,Myo5a,Slc25a5,Atp1b3,Ywhah,Atp1b1,Hpca,Slc1a3,Atp2b1,Atp2b4,Atp2a2,Ywhae,Cox6c,Slc9a3r1,Atp5f1a,Anxa6,Vdac1,Slc12a2,Slc25a4,Atp5pf,Phb2,Atp5f1c,Slc17a7,Bin1,Atp5me,Opa1,Slc12a5,Atp5po,Slc25a3,Atp6v0d1,Atp6v1c1,Atp5mg,Gpm6a,Atp5pd,Atp6v1a,Atp5mf
3_Member	GO Biological Processes	GO:1990542	mitochondrial transmembrane transport	-10.5404	-7.87026	15/95	25176,29483,65042,65262,83529,85333,94271,116550,140608,171116,192241,245959,300677,641434,690441	Slc25a5,Slc1a3,Sfxn3,Atp5f1a,Vdac1,Slc25a4,Atp5pf,Atp5f1c,Atp5me,Opa1,Atp5po,Slc25a3,Atp5mg,Atp5pd,Atp5mf
3_Member	GO Biological Processes	GO:0019693	ribose phosphate metabolic process	-10.518	-7.86044	28/387	24191,24333,24334,24465,24642,24644,25058,25630,60416,65152,65262,81654,94271,116550,117273,140608,171116,191575,192241,289950,290029,295922,299201,300677,303179,641434,685232,690441	Aldoc,Eno1,Eno2,Hprt1,Pgam1,Pgk1,Hk1,Pkm,Pfkp,Pfkm,Atp5f1a,Dlat,Atp5pf,Atp5f1c,Rhoa,Atp5me,Opa1,Nme1,Atp5po,Pdhb,Pnp,Mtch2,Dlst,Atp5mg,Guk1,Atp5pd,Atp6v1a,Atp5mf
3_Member	GO Biological Processes	GO:0009205	purine ribonucleoside triphosphate metabolic process	-10.2024	-7.58474	14/84	24333,25630,65262,94271,116550,117273,140608,171116,191575,192241,300677,641434,685232,690441	Eno1,Pkm,Atp5f1a,Atp5pf,Atp5f1c,Rhoa,Atp5me,Opa1,Nme1,Atp5po,Atp5mg,Atp5pd,Atp6v1a,Atp5mf
3_Member	GO Biological Processes	GO:0015985	energy coupled proton transport, down electrochemical gradient	-10.1843	-7.58474	9/24	65262,94271,116550,140608,192241,300677,641434,685232,690441	Atp5f1a,Atp5pf,Atp5f1c,Atp5me,Atp5po,Atp5mg,Atp5pd,Atp6v1a,Atp5mf
3_Member	GO Biological Processes	GO:0015986	ATP synthesis coupled proton transport	-10.1843	-7.58474	9/24	65262,94271,116550,140608,192241,300677,641434,685232,690441	Atp5f1a,Atp5pf,Atp5f1c,Atp5me,Atp5po,Atp5mg,Atp5pd,Atp6v1a,Atp5mf
3_Member	GO Biological Processes	GO:0009117	nucleotide metabolic process	-10.1695	-7.58072	30/458	24191,24333,24334,24465,24642,24644,25058,25630,29177,60416,65152,65262,81654,94271,116550,117273,140608,171116,191575,192241,289950,290029,295922,299201,300677,303179,361596,641434,685232,690441	Aldoc,Eno1,Eno2,Hprt1,Pgam1,Pgk1,Hk1,Pkm,Hpca,Pfkp,Pfkm,Atp5f1a,Dlat,Atp5pf,Atp5f1c,Rhoa,Atp5me,Opa1,Nme1,Atp5po,Pdhb,Pnp,Mtch2,Dlst,Atp5mg,Guk1,Idh2,Atp5pd,Atp6v1a,Atp5mf
3_Member	GO Biological Processes	GO:0006753	nucleoside phosphate metabolic process	-9.98593	-7.4278	30/466	24191,24333,24334,24465,24642,24644,25058,25630,29177,60416,65152,65262,81654,94271,116550,117273,140608,171116,191575,192241,289950,290029,295922,299201,300677,303179,361596,641434,685232,690441	Aldoc,Eno1,Eno2,Hprt1,Pgam1,Pgk1,Hk1,Pkm,Hpca,Pfkp,Pfkm,Atp5f1a,Dlat,Atp5pf,Atp5f1c,Rhoa,Atp5me,Opa1,Nme1,Atp5po,Pdhb,Pnp,Mtch2,Dlst,Atp5mg,Guk1,Idh2,Atp5pd,Atp6v1a,Atp5mf
3_Member	GO Biological Processes	GO:0055086	nucleobase-containing small molecule metabolic process	-9.89148	-7.3431	32/531	24191,24333,24334,24465,24642,24644,25058,25416,25630,29177,60416,65152,65208,65262,81654,94271,116550,117273,140608,171116,191575,192241,289950,290029,295922,299201,300677,303179,361596,641434,685232,690441	Aldoc,Eno1,Eno2,Hprt1,Pgam1,Pgk1,Hk1,Dpysl2,Pkm,Hpca,Pfkp,Pfkm,Dpysl5,Atp5f1a,Dlat,Atp5pf,Atp5f1c,Rhoa,Atp5me,Opa1,Nme1,Atp5po,Pdhb,Pnp,Mtch2,Dlst,Atp5mg,Guk1,Idh2,Atp5pd,Atp6v1a,Atp5mf
3_Member	GO Biological Processes	GO:0042776	mitochondrial ATP synthesis coupled proton transport	-9.82143	-7.29217	8/18	65262,94271,116550,140608,192241,300677,641434,690441	Atp5f1a,Atp5pf,Atp5f1c,Atp5me,Atp5po,Atp5mg,Atp5pd,Atp5mf
3_Member	GO Biological Processes	GO:0009199	ribonucleoside triphosphate metabolic process	-9.71882	-7.20743	14/91	24333,25630,65262,94271,116550,117273,140608,171116,191575,192241,300677,641434,685232,690441	Eno1,Pkm,Atp5f1a,Atp5pf,Atp5f1c,Rhoa,Atp5me,Opa1,Nme1,Atp5po,Atp5mg,Atp5pd,Atp6v1a,Atp5mf
3_Member	GO Biological Processes	GO:0009141	nucleoside triphosphate metabolic process	-9.32819	-6.85899	15/115	24333,25630,65262,94271,116550,117273,140608,171116,191575,192241,300677,303179,641434,685232,690441	Eno1,Pkm,Atp5f1a,Atp5pf,Atp5f1c,Rhoa,Atp5me,Opa1,Nme1,Atp5po,Atp5mg,Guk1,Atp5pd,Atp6v1a,Atp5mf
3_Member	GO Biological Processes	GO:0009206	purine ribonucleoside triphosphate biosynthetic process	-9.04789	-6.62445	12/69	24333,25630,65262,94271,116550,140608,191575,192241,300677,641434,685232,690441	Eno1,Pkm,Atp5f1a,Atp5pf,Atp5f1c,Atp5me,Nme1,Atp5po,Atp5mg,Atp5pd,Atp6v1a,Atp5mf
3_Member	GO Biological Processes	GO:0009145	purine nucleoside triphosphate biosynthetic process	-8.97241	-6.55615	12/70	24333,25630,65262,94271,116550,140608,191575,192241,300677,641434,685232,690441	Eno1,Pkm,Atp5f1a,Atp5pf,Atp5f1c,Atp5me,Nme1,Atp5po,Atp5mg,Atp5pd,Atp6v1a,Atp5mf
3_Member	GO Biological Processes	GO:0072522	purine-containing compound biosynthetic process	-8.95343	-6.54423	18/185	24333,24465,25630,29177,65262,81654,94271,116550,140608,191575,192241,289950,290029,300677,303179,641434,685232,690441	Eno1,Hprt1,Pkm,Hpca,Atp5f1a,Dlat,Atp5pf,Atp5f1c,Atp5me,Nme1,Atp5po,Pdhb,Pnp,Atp5mg,Guk1,Atp5pd,Atp6v1a,Atp5mf
3_Member	GO Biological Processes	GO:0006754	ATP biosynthetic process	-8.6775	-6.28882	11/59	24333,25630,65262,94271,116550,140608,192241,300677,641434,685232,690441	Eno1,Pkm,Atp5f1a,Atp5pf,Atp5f1c,Atp5me,Atp5po,Atp5mg,Atp5pd,Atp6v1a,Atp5mf
3_Member	GO Biological Processes	GO:0009201	ribonucleoside triphosphate biosynthetic process	-8.61322	-6.23118	12/75	24333,25630,65262,94271,116550,140608,191575,192241,300677,641434,685232,690441	Eno1,Pkm,Atp5f1a,Atp5pf,Atp5f1c,Atp5me,Nme1,Atp5po,Atp5mg,Atp5pd,Atp6v1a,Atp5mf
3_Member	GO Biological Processes	GO:0006164	purine nucleotide biosynthetic process	-8.36305	-6.02479	17/178	24333,24465,25630,29177,65262,81654,94271,116550,140608,191575,192241,289950,300677,303179,641434,685232,690441	Eno1,Hprt1,Pkm,Hpca,Atp5f1a,Dlat,Atp5pf,Atp5f1c,Atp5me,Nme1,Atp5po,Pdhb,Atp5mg,Guk1,Atp5pd,Atp6v1a,Atp5mf
3_Member	GO Biological Processes	GO:0009152	purine ribonucleotide biosynthetic process	-8.2316	-5.90507	16/159	24333,24465,25630,65262,81654,94271,116550,140608,191575,192241,289950,300677,303179,641434,685232,690441	Eno1,Hprt1,Pkm,Atp5f1a,Dlat,Atp5pf,Atp5f1c,Atp5me,Nme1,Atp5po,Pdhb,Atp5mg,Guk1,Atp5pd,Atp6v1a,Atp5mf
3_Member	GO Biological Processes	GO:0009165	nucleotide biosynthetic process	-8.19509	-5.87432	19/231	24333,24465,25630,29177,65262,81654,94271,116550,140608,191575,192241,289950,290029,300677,303179,361596,641434,685232,690441	Eno1,Hprt1,Pkm,Hpca,Atp5f1a,Dlat,Atp5pf,Atp5f1c,Atp5me,Nme1,Atp5po,Pdhb,Pnp,Atp5mg,Guk1,Idh2,Atp5pd,Atp6v1a,Atp5mf
3_Member	GO Biological Processes	GO:1901293	nucleoside phosphate biosynthetic process	-8.10298	-5.79902	19/234	24333,24465,25630,29177,65262,81654,94271,116550,140608,191575,192241,289950,290029,300677,303179,361596,641434,685232,690441	Eno1,Hprt1,Pkm,Hpca,Atp5f1a,Dlat,Atp5pf,Atp5f1c,Atp5me,Nme1,Atp5po,Pdhb,Pnp,Atp5mg,Guk1,Idh2,Atp5pd,Atp6v1a,Atp5mf
3_Member	GO Biological Processes	GO:0009142	nucleoside triphosphate biosynthetic process	-7.973	-5.67989	12/85	24333,25630,65262,94271,116550,140608,191575,192241,300677,641434,685232,690441	Eno1,Pkm,Atp5f1a,Atp5pf,Atp5f1c,Atp5me,Nme1,Atp5po,Atp5mg,Atp5pd,Atp6v1a,Atp5mf
3_Member	GO Biological Processes	GO:0009260	ribonucleotide biosynthetic process	-7.70416	-5.44209	16/173	24333,24465,25630,65262,81654,94271,116550,140608,191575,192241,289950,300677,303179,641434,685232,690441	Eno1,Hprt1,Pkm,Atp5f1a,Dlat,Atp5pf,Atp5f1c,Atp5me,Nme1,Atp5po,Pdhb,Atp5mg,Guk1,Atp5pd,Atp6v1a,Atp5mf
3_Member	GO Biological Processes	GO:0046390	ribose phosphate biosynthetic process	-7.4597	-5.22128	16/180	24333,24465,25630,65262,81654,94271,116550,140608,191575,192241,289950,300677,303179,641434,685232,690441	Eno1,Hprt1,Pkm,Atp5f1a,Dlat,Atp5pf,Atp5f1c,Atp5me,Nme1,Atp5po,Pdhb,Atp5mg,Guk1,Atp5pd,Atp6v1a,Atp5mf
3_Member	GO Biological Processes	GO:0090407	organophosphate biosynthetic process	-6.32972	-4.20368	25/496	24264,24333,24465,25104,25630,29177,29593,64473,65262,79131,81654,81677,94271,116550,140608,191575,192241,289950,290029,300677,303179,361596,641434,685232,690441	Ckb,Eno1,Hprt1,Pc,Pkm,Hpca,Ckmt1,Bpnt1,Atp5f1a,Fabp3,Dlat,Itpka,Atp5pf,Atp5f1c,Atp5me,Nme1,Atp5po,Pdhb,Pnp,Atp5mg,Guk1,Idh2,Atp5pd,Atp6v1a,Atp5mf
4_Summary	GO Biological Processes	GO:0072657	protein localization to membrane	-12.8574	-9.69723	39/608	24242,24245,24686,24923,25012,25017,25390,25400,25558,25617,25650,29177,29431,29448,29495,29600,29704,58948,59114,64053,79434,81732,83427,84027,89816,116563,116690,140670,171026,171139,171444,252892,252928,266777,295922,305614,361069,362587,363875,25524,81757,309557,24672,24818,24957,25152,25595,29271,29374,29753,50558,56064,60374,288305,301252	Calm1,Camk2b,Prnp,Stx1b,Snap25,Myo5a,Atp1b3,Camk2a,Stxbp1,Hspa5,Atp1b1,Hpca,Pak1,Rab7a,Dlg4,Atp2b4,Pacsin1,Dlg3,Slc9a3r1,Dlg2,Rab11b,Actr3,Rack1,Gsk3b,Picalm,Ap2m1,Nfasc,Ap2b1,Akap5,Timm9,Pacs1,Lgi1,Timm13,Nptx1,Mtch2,Sptbn1,Dmtn,Macf1,Rac1,Psap,Rala,Epb41l2,Ppp2ca,Tcp1,Glul,Map1a,Map2,Cfl1,Cct4,Ywhae,Npepps,Nptn,Lmna,Cct8,Hsp90ab1
4_Member	GO Biological Processes	GO:0072657	protein localization to membrane	-12.8574	-9.69723	39/608	24242,24245,24686,24923,25012,25017,25390,25400,25558,25617,25650,29177,29431,29448,29495,29600,29704,58948,59114,64053,79434,81732,83427,84027,89816,116563,116690,140670,171026,171139,171444,252892,252928,266777,295922,305614,361069,362587,363875	Calm1,Camk2b,Prnp,Stx1b,Snap25,Myo5a,Atp1b3,Camk2a,Stxbp1,Hspa5,Atp1b1,Hpca,Pak1,Rab7a,Dlg4,Atp2b4,Pacsin1,Dlg3,Slc9a3r1,Dlg2,Rab11b,Actr3,Rack1,Gsk3b,Picalm,Ap2m1,Nfasc,Ap2b1,Akap5,Timm9,Pacs1,Lgi1,Timm13,Nptx1,Mtch2,Sptbn1,Dmtn,Macf1,Rac1
4_Member	GO Biological Processes	GO:0051668	localization within membrane	-12.7075	-9.58512	41/676	24242,24245,24686,24923,25012,25017,25390,25400,25524,25558,25617,25650,29177,29431,29448,29495,29600,29704,58948,59114,64053,79434,81732,81757,83427,84027,89816,116563,116690,140670,171026,171139,171444,252892,252928,266777,295922,305614,361069,362587,363875	Calm1,Camk2b,Prnp,Stx1b,Snap25,Myo5a,Atp1b3,Camk2a,Psap,Stxbp1,Hspa5,Atp1b1,Hpca,Pak1,Rab7a,Dlg4,Atp2b4,Pacsin1,Dlg3,Slc9a3r1,Dlg2,Rab11b,Actr3,Rala,Rack1,Gsk3b,Picalm,Ap2m1,Nfasc,Ap2b1,Akap5,Timm9,Pacs1,Lgi1,Timm13,Nptx1,Mtch2,Sptbn1,Dmtn,Macf1,Rac1
4_Member	GO Biological Processes	GO:1990778	protein localization to cell periphery	-11.591	-8.66819	29/375	24245,24686,24923,25012,25017,25390,25400,25558,25650,29448,29495,29600,29704,59114,64053,81732,83427,84027,89816,116563,116690,171026,171444,252892,266777,305614,309557,362587,363875	Camk2b,Prnp,Stx1b,Snap25,Myo5a,Atp1b3,Camk2a,Stxbp1,Atp1b1,Rab7a,Dlg4,Atp2b4,Pacsin1,Slc9a3r1,Dlg2,Actr3,Rack1,Gsk3b,Picalm,Ap2m1,Nfasc,Akap5,Pacs1,Lgi1,Nptx1,Sptbn1,Epb41l2,Macf1,Rac1
4_Member	GO Biological Processes	GO:1903827	regulation of cellular protein localization	-8.5886	-6.21308	32/599	24245,24672,24686,24818,24957,25017,25152,25400,25595,29177,29271,29374,29431,29495,29600,29753,50558,56064,60374,79434,81732,83427,84027,89816,116563,140670,171026,288305,301252,305614,309557,361069	Camk2b,Ppp2ca,Prnp,Tcp1,Glul,Myo5a,Map1a,Camk2a,Map2,Hpca,Cfl1,Cct4,Pak1,Dlg4,Atp2b4,Ywhae,Npepps,Nptn,Lmna,Rab11b,Actr3,Rack1,Gsk3b,Picalm,Ap2m1,Ap2b1,Akap5,Cct8,Hsp90ab1,Sptbn1,Epb41l2,Dmtn
4_Member	GO Biological Processes	GO:0072659	protein localization to plasma membrane	-7.60474	-5.35255	21/306	24245,24686,25017,25390,25400,25558,25650,29448,29600,29704,59114,81732,83427,89816,116563,116690,171026,171444,305614,362587,363875	Camk2b,Prnp,Myo5a,Atp1b3,Camk2a,Stxbp1,Atp1b1,Rab7a,Atp2b4,Pacsin1,Slc9a3r1,Actr3,Rack1,Picalm,Ap2m1,Nfasc,Akap5,Pacs1,Sptbn1,Macf1,Rac1
4_Member	GO Biological Processes	GO:1903829	positive regulation of cellular protein localization	-7.45908	-5.22128	21/312	24686,24818,25017,25152,29177,29271,29374,29431,29495,29600,50558,56064,81732,83427,84027,140670,171026,288305,301252,305614,309557	Prnp,Tcp1,Myo5a,Map1a,Hpca,Cfl1,Cct4,Pak1,Dlg4,Atp2b4,Npepps,Nptn,Actr3,Rack1,Gsk3b,Ap2b1,Akap5,Cct8,Hsp90ab1,Sptbn1,Epb41l2
4_Member	GO Biological Processes	GO:1905475	regulation of protein localization to membrane	-7.3494	-5.12094	17/208	24245,24686,25017,25400,29177,29431,29495,29600,81732,83427,84027,89816,116563,140670,171026,305614,361069	Camk2b,Prnp,Myo5a,Camk2a,Hpca,Pak1,Dlg4,Atp2b4,Actr3,Rack1,Gsk3b,Picalm,Ap2m1,Ap2b1,Akap5,Sptbn1,Dmtn
4_Member	GO Biological Processes	GO:0090150	establishment of protein localization to membrane	-6.70128	-4.53712	18/258	24242,24686,24923,25012,25617,29177,29431,29448,79434,81732,83427,171026,171139,252928,295922,305614,361069,362587	Calm1,Prnp,Stx1b,Snap25,Hspa5,Hpca,Pak1,Rab7a,Rab11b,Actr3,Rack1,Akap5,Timm9,Timm13,Mtch2,Sptbn1,Dmtn,Macf1
4_Member	GO Biological Processes	GO:1904375	regulation of protein localization to cell periphery	-6.20977	-4.10855	13/145	24245,24686,25017,25400,29600,81732,83427,84027,89816,116563,171026,305614,309557	Camk2b,Prnp,Myo5a,Camk2a,Atp2b4,Actr3,Rack1,Gsk3b,Picalm,Ap2m1,Akap5,Sptbn1,Epb41l2
4_Member	GO Biological Processes	GO:1905477	positive regulation of protein localization to membrane	-5.50686	-3.52799	11/118	24686,25017,29177,29431,29495,29600,81732,83427,140670,171026,305614	Prnp,Myo5a,Hpca,Pak1,Dlg4,Atp2b4,Actr3,Rack1,Ap2b1,Akap5,Sptbn1
4_Member	GO Biological Processes	GO:1903076	regulation of protein localization to plasma membrane	-5.47088	-3.49718	11/119	24245,24686,25017,25400,29600,81732,83427,89816,116563,171026,305614	Camk2b,Prnp,Myo5a,Camk2a,Atp2b4,Actr3,Rack1,Picalm,Ap2m1,Akap5,Sptbn1
4_Member	GO Biological Processes	GO:1904377	positive regulation of protein localization to cell periphery	-4.75523	-2.88915	8/71	24686,25017,29600,81732,83427,171026,305614,309557	Prnp,Myo5a,Atp2b4,Actr3,Rack1,Akap5,Sptbn1,Epb41l2
4_Member	GO Biological Processes	GO:1903078	positive regulation of protein localization to plasma membrane	-4.14258	-2.38443	7/64	24686,25017,29600,81732,83427,171026,305614	Prnp,Myo5a,Atp2b4,Actr3,Rack1,Akap5,Sptbn1
4_Member	GO Biological Processes	GO:0098876	vesicle-mediated transport to the plasma membrane	-2.86799	-1.4696	7/143	24923,25012,29448,79434,83427,171026,305614	Stx1b,Snap25,Rab7a,Rab11b,Rack1,Akap5,Sptbn1
5_Summary	GO Biological Processes	GO:0048812	neuron projection morphogenesis	-12.6125	-9.52485	42/712	24245,24465,24674,25012,25152,25393,25400,25416,25558,25576,25595,25613,25716,29271,29431,29495,29525,29704,56064,60465,65208,79559,81677,81732,83527,83572,84008,84027,89816,114028,116690,116743,117273,171026,171116,252892,266777,301252,306439,316539,362587,363875,24171,24468,24686,24949,25017,25578,58948,58982,60324,64053,64158,64303,79120,259269,171373,29483,59114,361069,683788,24213,24923,1166…	Camk2b,Hprt1,Ppp3ca,Snap25,Map1a,Bcan,Camk2a,Dpysl2,Stxbp1,Ywhah,Map2,Ptprz1,Syt1,Cfl1,Pak1,Dlg4,Pitpna,Pacsin1,Nptn,Cttn,Dpysl5,Alcam,Itpka,Actr3,Dbnl,Pafah1b1,Cntnap1,Gsk3b,Picalm,Ctnnd2,Nfasc,Sh3gl2,Rhoa,Akap5,Opa1,Lgi1,Nptx1,Hsp90ab1,Gpm6a,Epha4,Macf1,Rac1,Add2,Hspa8,Prnp,Syn1,Myo5a,Ywhaz,Dlg3,Ncan,Synpo,Dlg2,Tuba1a,Pfn1,Arf4,Erc2,Slc12a5,Slc1a3,Slc9a3r1,Dmtn,Fscn1,Atp1a3,Stx1b,Slc17a7,Hspa5,…
5_Member	GO Biological Processes	GO:0048812	neuron projection morphogenesis	-12.6125	-9.52485	42/712	24245,24465,24674,25012,25152,25393,25400,25416,25558,25576,25595,25613,25716,29271,29431,29495,29525,29704,56064,60465,65208,79559,81677,81732,83527,83572,84008,84027,89816,114028,116690,116743,117273,171026,171116,252892,266777,301252,306439,316539,362587,363875	Camk2b,Hprt1,Ppp3ca,Snap25,Map1a,Bcan,Camk2a,Dpysl2,Stxbp1,Ywhah,Map2,Ptprz1,Syt1,Cfl1,Pak1,Dlg4,Pitpna,Pacsin1,Nptn,Cttn,Dpysl5,Alcam,Itpka,Actr3,Dbnl,Pafah1b1,Cntnap1,Gsk3b,Picalm,Ctnnd2,Nfasc,Sh3gl2,Rhoa,Akap5,Opa1,Lgi1,Nptx1,Hsp90ab1,Gpm6a,Epha4,Macf1,Rac1
5_Member	GO Biological Processes	GO:0050808	synapse organization	-12.4484	-9.42292	35/508	24171,24245,24468,24686,24949,25012,25017,25393,25578,29271,29431,29495,56064,58948,58982,60324,60465,64053,64158,64303,79120,81677,81732,83527,83572,84027,89816,114028,116690,117273,171116,259269,266777,306439,316539	Add2,Camk2b,Hspa8,Prnp,Syn1,Snap25,Myo5a,Bcan,Ywhaz,Cfl1,Pak1,Dlg4,Nptn,Dlg3,Ncan,Synpo,Cttn,Dlg2,Tuba1a,Pfn1,Arf4,Itpka,Actr3,Dbnl,Pafah1b1,Gsk3b,Picalm,Ctnnd2,Nfasc,Rhoa,Opa1,Erc2,Nptx1,Gpm6a,Epha4
5_Member	GO Biological Processes	GO:0120039	plasma membrane bounded cell projection morphogenesis	-12.272	-9.27452	42/729	24245,24465,24674,25012,25152,25393,25400,25416,25558,25576,25595,25613,25716,29271,29431,29495,29525,29704,56064,60465,65208,79559,81677,81732,83527,83572,84008,84027,89816,114028,116690,116743,117273,171026,171116,252892,266777,301252,306439,316539,362587,363875	Camk2b,Hprt1,Ppp3ca,Snap25,Map1a,Bcan,Camk2a,Dpysl2,Stxbp1,Ywhah,Map2,Ptprz1,Syt1,Cfl1,Pak1,Dlg4,Pitpna,Pacsin1,Nptn,Cttn,Dpysl5,Alcam,Itpka,Actr3,Dbnl,Pafah1b1,Cntnap1,Gsk3b,Picalm,Ctnnd2,Nfasc,Sh3gl2,Rhoa,Akap5,Opa1,Lgi1,Nptx1,Hsp90ab1,Gpm6a,Epha4,Macf1,Rac1
5_Member	GO Biological Processes	GO:0048858	cell projection morphogenesis	-12.1934	-9.22229	42/733	24245,24465,24674,25012,25152,25393,25400,25416,25558,25576,25595,25613,25716,29271,29431,29495,29525,29704,56064,60465,65208,79559,81677,81732,83527,83572,84008,84027,89816,114028,116690,116743,117273,171026,171116,252892,266777,301252,306439,316539,362587,363875	Camk2b,Hprt1,Ppp3ca,Snap25,Map1a,Bcan,Camk2a,Dpysl2,Stxbp1,Ywhah,Map2,Ptprz1,Syt1,Cfl1,Pak1,Dlg4,Pitpna,Pacsin1,Nptn,Cttn,Dpysl5,Alcam,Itpka,Actr3,Dbnl,Pafah1b1,Cntnap1,Gsk3b,Picalm,Ctnnd2,Nfasc,Sh3gl2,Rhoa,Akap5,Opa1,Lgi1,Nptx1,Hsp90ab1,Gpm6a,Epha4,Macf1,Rac1
5_Member	GO Biological Processes	GO:0032990	cell part morphogenesis	-11.7528	-8.80645	42/756	24245,24465,24674,25012,25152,25393,25400,25416,25558,25576,25595,25613,25716,29271,29431,29495,29525,29704,56064,60465,65208,79559,81677,81732,83527,83572,84008,84027,89816,114028,116690,116743,117273,171026,171116,252892,266777,301252,306439,316539,362587,363875	Camk2b,Hprt1,Ppp3ca,Snap25,Map1a,Bcan,Camk2a,Dpysl2,Stxbp1,Ywhah,Map2,Ptprz1,Syt1,Cfl1,Pak1,Dlg4,Pitpna,Pacsin1,Nptn,Cttn,Dpysl5,Alcam,Itpka,Actr3,Dbnl,Pafah1b1,Cntnap1,Gsk3b,Picalm,Ctnnd2,Nfasc,Sh3gl2,Rhoa,Akap5,Opa1,Lgi1,Nptx1,Hsp90ab1,Gpm6a,Epha4,Macf1,Rac1
5_Member	GO Biological Processes	GO:0016358	dendrite development	-10.8824	-8.07871	26/321	24245,24465,24674,25152,25400,25576,25595,25613,29271,29431,29495,29704,79120,81677,81732,83527,83572,84027,89816,114028,117273,171026,171116,171373,316539,363875	Camk2b,Hprt1,Ppp3ca,Map1a,Camk2a,Ywhah,Map2,Ptprz1,Cfl1,Pak1,Dlg4,Pacsin1,Arf4,Itpka,Actr3,Dbnl,Pafah1b1,Gsk3b,Picalm,Ctnnd2,Rhoa,Akap5,Opa1,Slc12a5,Epha4,Rac1
5_Member	GO Biological Processes	GO:0048667	cell morphogenesis involved in neuron differentiation	-10.5578	-7.87026	37/656	24245,24465,24674,25012,25152,25400,25416,25558,25576,25595,25613,29271,29431,29483,29495,29525,56064,59114,60465,65208,79559,81677,81732,83527,83572,84027,89816,114028,116690,171026,171116,252892,266777,301252,316539,362587,363875	Camk2b,Hprt1,Ppp3ca,Snap25,Map1a,Camk2a,Dpysl2,Stxbp1,Ywhah,Map2,Ptprz1,Cfl1,Pak1,Slc1a3,Dlg4,Pitpna,Nptn,Slc9a3r1,Cttn,Dpysl5,Alcam,Itpka,Actr3,Dbnl,Pafah1b1,Gsk3b,Picalm,Ctnnd2,Nfasc,Akap5,Opa1,Lgi1,Nptx1,Hsp90ab1,Epha4,Macf1,Rac1
5_Member	GO Biological Processes	GO:0048813	dendrite morphogenesis	-10.469	-7.82368	20/191	24245,24465,24674,25400,25576,25595,25613,29271,29495,81677,81732,83527,83572,84027,89816,114028,171026,171116,316539,363875	Camk2b,Hprt1,Ppp3ca,Camk2a,Ywhah,Map2,Ptprz1,Cfl1,Dlg4,Itpka,Actr3,Dbnl,Pafah1b1,Gsk3b,Picalm,Ctnnd2,Akap5,Opa1,Epha4,Rac1
5_Member	GO Biological Processes	GO:0034330	cell junction organization	-10.0336	-7.46549	40/786	24171,24245,24468,24686,24949,25012,25017,25393,25578,29271,29431,29495,56064,58948,58982,60324,60465,64053,64158,64303,79120,81677,81732,83527,83572,84008,84027,89816,114028,116690,117273,171116,259269,266777,306439,316539,361069,362587,363875,683788	Add2,Camk2b,Hspa8,Prnp,Syn1,Snap25,Myo5a,Bcan,Ywhaz,Cfl1,Pak1,Dlg4,Nptn,Dlg3,Ncan,Synpo,Cttn,Dlg2,Tuba1a,Pfn1,Arf4,Itpka,Actr3,Dbnl,Pafah1b1,Cntnap1,Gsk3b,Picalm,Ctnnd2,Nfasc,Rhoa,Opa1,Erc2,Nptx1,Gpm6a,Epha4,Dmtn,Macf1,Rac1,Fscn1
5_Member	GO Biological Processes	GO:0106027	neuron projection organization	-9.60636	-7.11234	15/110	24213,24245,24686,25152,29271,29495,60465,81677,81732,83527,83572,84027,114028,171116,316539	Atp1a3,Camk2b,Prnp,Map1a,Cfl1,Dlg4,Cttn,Itpka,Actr3,Dbnl,Pafah1b1,Gsk3b,Ctnnd2,Opa1,Epha4
5_Member	GO Biological Processes	GO:0050803	regulation of synapse structure or activity	-9.23799	-6.77899	22/273	24245,24468,24686,24923,25012,25578,29271,58982,64158,79120,81677,81732,83527,83572,84027,89816,116638,117273,171116,266777,306439,316539	Camk2b,Hspa8,Prnp,Stx1b,Snap25,Ywhaz,Cfl1,Ncan,Tuba1a,Arf4,Itpka,Actr3,Dbnl,Pafah1b1,Gsk3b,Picalm,Slc17a7,Rhoa,Opa1,Nptx1,Gpm6a,Epha4
5_Member	GO Biological Processes	GO:0031344	regulation of cell projection organization	-8.74623	-6.34398	38/797	24245,24674,24686,24923,25012,25416,25576,25595,25613,25617,29271,29431,29495,29704,50864,56064,58945,60465,64303,81677,81732,81757,83527,83532,83572,84027,89816,117273,171026,171116,191575,306439,316539,360739,361069,362587,363875,683788	Camk2b,Ppp3ca,Prnp,Stx1b,Snap25,Dpysl2,Ywhah,Map2,Ptprz1,Hspa5,Cfl1,Pak1,Dlg4,Pacsin1,Ntm,Nptn,Dynll1,Cttn,Pfn1,Itpka,Actr3,Rala,Dbnl,Vdac3,Pafah1b1,Gsk3b,Picalm,Rhoa,Akap5,Opa1,Nme1,Gpm6a,Epha4,Ranbp1,Dmtn,Macf1,Rac1,Fscn1
5_Member	GO Biological Processes	GO:0060996	dendritic spine development	-8.5266	-6.16386	15/131	24245,25400,29271,29431,29495,79120,81677,81732,83527,83572,114028,171116,171373,316539,363875	Camk2b,Camk2a,Cfl1,Pak1,Dlg4,Arf4,Itpka,Actr3,Dbnl,Pafah1b1,Ctnnd2,Opa1,Slc12a5,Epha4,Rac1
5_Member	GO Biological Processes	GO:0050807	regulation of synapse organization	-7.95806	-5.67029	20/265	24245,24468,24686,25012,25578,29271,58982,64158,79120,81677,81732,83527,83572,84027,89816,117273,171116,266777,306439,316539	Camk2b,Hspa8,Prnp,Snap25,Ywhaz,Cfl1,Ncan,Tuba1a,Arf4,Itpka,Actr3,Dbnl,Pafah1b1,Gsk3b,Picalm,Rhoa,Opa1,Nptx1,Gpm6a,Epha4
5_Member	GO Biological Processes	GO:0120035	regulation of plasma membrane bounded cell projection organization	-7.93281	-5.6503	36/780	24245,24674,24686,24923,25012,25416,25576,25595,25613,25617,29271,29431,29704,50864,56064,58945,64303,81677,81732,81757,83527,83532,83572,84027,89816,117273,171026,171116,191575,306439,316539,360739,361069,362587,363875,683788	Camk2b,Ppp3ca,Prnp,Stx1b,Snap25,Dpysl2,Ywhah,Map2,Ptprz1,Hspa5,Cfl1,Pak1,Pacsin1,Ntm,Nptn,Dynll1,Pfn1,Itpka,Actr3,Rala,Dbnl,Vdac3,Pafah1b1,Gsk3b,Picalm,Rhoa,Akap5,Opa1,Nme1,Gpm6a,Epha4,Ranbp1,Dmtn,Macf1,Rac1,Fscn1
5_Member	GO Biological Processes	GO:0031346	positive regulation of cell projection organization	-7.73726	-5.46509	26/450	24245,25613,25617,29271,29431,29495,29704,56064,58945,64303,81677,81732,81757,83527,83572,84027,89816,171026,171116,191575,306439,316539,360739,362587,363875,683788	Camk2b,Ptprz1,Hspa5,Cfl1,Pak1,Dlg4,Pacsin1,Nptn,Dynll1,Pfn1,Itpka,Actr3,Rala,Dbnl,Pafah1b1,Gsk3b,Picalm,Akap5,Opa1,Nme1,Gpm6a,Epha4,Ranbp1,Macf1,Rac1,Fscn1
5_Member	GO Biological Processes	GO:0051129	negative regulation of cellular component organization	-7.62041	-5.3633	34/729	24171,24468,24674,24686,24851,24923,25152,25176,25558,25576,25595,25613,25617,29271,29495,29704,50864,60374,64303,81732,83527,83531,83572,84027,89816,117273,117280,171116,305614,316539,317396,361069,361651,493810	Add2,Hspa8,Ppp3ca,Prnp,Tpm1,Stx1b,Map1a,Slc25a5,Stxbp1,Ywhah,Map2,Ptprz1,Hspa5,Cfl1,Dlg4,Pacsin1,Ntm,Lmna,Pfn1,Actr3,Dbnl,Vdac2,Pafah1b1,Gsk3b,Picalm,Rhoa,Hnrnpu,Opa1,Sptbn1,Epha4,Ubqln2,Dmtn,Prrt2,Capza2
5_Member	GO Biological Processes	GO:0048814	regulation of dendrite morphogenesis	-7.36453	-5.13143	12/96	24245,24674,25576,25613,81677,81732,83527,83572,84027,171026,171116,316539	Camk2b,Ppp3ca,Ywhah,Ptprz1,Itpka,Actr3,Dbnl,Pafah1b1,Gsk3b,Akap5,Opa1,Epha4
5_Member	GO Biological Processes	GO:0097061	dendritic spine organization	-7.06663	-4.86936	12/102	24245,24686,29271,29495,60465,81677,81732,83527,83572,114028,171116,316539	Camk2b,Prnp,Cfl1,Dlg4,Cttn,Itpka,Actr3,Dbnl,Pafah1b1,Ctnnd2,Opa1,Epha4
5_Member	GO Biological Processes	GO:0099173	postsynapse organization	-7.02247	-4.82948	17/219	24245,24468,24686,29271,29495,58948,60465,64053,79120,81677,81732,83527,83572,114028,171116,266777,316539	Camk2b,Hspa8,Prnp,Cfl1,Dlg4,Dlg3,Cttn,Dlg2,Arf4,Itpka,Actr3,Dbnl,Pafah1b1,Ctnnd2,Opa1,Nptx1,Epha4
5_Member	GO Biological Processes	GO:0099175	regulation of postsynapse organization	-6.57139	-4.41902	12/113	24245,24468,24686,29271,79120,81677,81732,83527,83572,171116,266777,316539	Camk2b,Hspa8,Prnp,Cfl1,Arf4,Itpka,Actr3,Dbnl,Pafah1b1,Opa1,Nptx1,Epha4
5_Member	GO Biological Processes	GO:0060997	dendritic spine morphogenesis	-6.55437	-4.40586	10/74	24245,29271,29495,81677,81732,83527,83572,114028,171116,316539	Camk2b,Cfl1,Dlg4,Itpka,Actr3,Dbnl,Pafah1b1,Ctnnd2,Opa1,Epha4
5_Member	GO Biological Processes	GO:0010975	regulation of neuron projection development	-6.34095	-4.21124	27/565	24245,24674,24923,25012,25416,25576,25595,25613,25617,29271,29431,29704,50864,56064,81677,81732,83527,83572,84027,89816,117273,171026,171116,191575,316539,360739,362587	Camk2b,Ppp3ca,Stx1b,Snap25,Dpysl2,Ywhah,Map2,Ptprz1,Hspa5,Cfl1,Pak1,Pacsin1,Ntm,Nptn,Itpka,Actr3,Dbnl,Pafah1b1,Gsk3b,Picalm,Rhoa,Akap5,Opa1,Nme1,Epha4,Ranbp1,Macf1
5_Member	GO Biological Processes	GO:0007409	axonogenesis	-5.9548	-3.88032	24/485	25012,25152,25416,25558,25595,25613,29431,29525,56064,60465,65208,79559,81732,83527,83572,84027,89816,116690,252892,266777,301252,316539,362587,363875	Snap25,Map1a,Dpysl2,Stxbp1,Map2,Ptprz1,Pak1,Pitpna,Nptn,Cttn,Dpysl5,Alcam,Actr3,Dbnl,Pafah1b1,Gsk3b,Picalm,Nfasc,Lgi1,Nptx1,Hsp90ab1,Epha4,Macf1,Rac1
5_Member	GO Biological Processes	GO:0061001	regulation of dendritic spine morphogenesis	-5.47982	-3.50354	8/57	24245,29271,81677,81732,83527,83572,171116,316539	Camk2b,Cfl1,Itpka,Actr3,Dbnl,Pafah1b1,Opa1,Epha4
5_Member	GO Biological Processes	GO:0061003	positive regulation of dendritic spine morphogenesis	-5.34536	-3.39905	6/28	24245,81677,81732,83527,83572,171116	Camk2b,Itpka,Actr3,Dbnl,Pafah1b1,Opa1
5_Member	GO Biological Processes	GO:0061564	axon development	-5.16599	-3.25276	24/539	25012,25152,25416,25558,25595,25613,29431,29525,56064,60465,65208,79559,81732,83527,83572,84027,89816,116690,252892,266777,301252,316539,362587,363875	Snap25,Map1a,Dpysl2,Stxbp1,Map2,Ptprz1,Pak1,Pitpna,Nptn,Cttn,Dpysl5,Alcam,Actr3,Dbnl,Pafah1b1,Gsk3b,Picalm,Nfasc,Lgi1,Nptx1,Hsp90ab1,Epha4,Macf1,Rac1
5_Member	GO Biological Processes	GO:0060999	positive regulation of dendritic spine development	-5.04301	-3.15105	8/65	24245,29271,81677,81732,83527,83572,171116,363875	Camk2b,Cfl1,Itpka,Actr3,Dbnl,Pafah1b1,Opa1,Rac1
5_Member	GO Biological Processes	GO:0031345	negative regulation of cell projection organization	-4.23607	-2.45609	13/220	24674,24686,24923,25576,25595,25613,29271,50864,81732,83572,84027,117273,316539	Ppp3ca,Prnp,Stx1b,Ywhah,Map2,Ptprz1,Cfl1,Ntm,Actr3,Pafah1b1,Gsk3b,Rhoa,Epha4
5_Member	GO Biological Processes	GO:0060998	regulation of dendritic spine development	-4.18378	-2.41516	8/85	24245,29271,81677,81732,83527,83572,171116,363875	Camk2b,Cfl1,Itpka,Actr3,Dbnl,Pafah1b1,Opa1,Rac1
5_Member	GO Biological Processes	GO:0010976	positive regulation of neuron projection development	-3.50358	-1.85322	12/227	24245,25613,25617,29704,56064,81677,81732,83527,83572,171116,191575,360739	Camk2b,Ptprz1,Hspa5,Pacsin1,Nptn,Itpka,Actr3,Dbnl,Pafah1b1,Opa1,Nme1,Ranbp1
6_Summary	GO Biological Processes	GO:0061024	membrane organization	-12.5318	-9.47632	43/748	24242,24468,24923,25012,25176,25400,25524,25558,25716,29448,29495,29525,29693,29704,59114,60374,64053,79125,83531,83572,84027,85333,89816,116561,116563,116657,116690,116743,117028,117273,117277,140673,140694,171026,171116,171139,252928,295922,296966,305614,312444,361651,363875,25017,25578	Calm1,Hspa8,Stx1b,Snap25,Slc25a5,Camk2a,Psap,Stxbp1,Syt1,Rab7a,Dlg4,Pitpna,Atp2a2,Pacsin1,Slc9a3r1,Lmna,Dlg2,Anxa6,Vdac2,Pafah1b1,Gsk3b,Slc25a4,Picalm,Cltb,Ap2m1,Cplx2,Nfasc,Sh3gl2,Bin1,Rhoa,Epn1,Napa,Dnm1,Akap5,Opa1,Timm9,Timm13,Mtch2,Chchd3,Sptbn1,Immt,Prrt2,Rac1,Myo5a,Ywhaz
6_Member	GO Biological Processes	GO:0061024	membrane organization	-12.5318	-9.47632	43/748	24242,24468,24923,25012,25176,25400,25524,25558,25716,29448,29495,29525,29693,29704,59114,60374,64053,79125,83531,83572,84027,85333,89816,116561,116563,116657,116690,116743,117028,117273,117277,140673,140694,171026,171116,171139,252928,295922,296966,305614,312444,361651,363875	Calm1,Hspa8,Stx1b,Snap25,Slc25a5,Camk2a,Psap,Stxbp1,Syt1,Rab7a,Dlg4,Pitpna,Atp2a2,Pacsin1,Slc9a3r1,Lmna,Dlg2,Anxa6,Vdac2,Pafah1b1,Gsk3b,Slc25a4,Picalm,Cltb,Ap2m1,Cplx2,Nfasc,Sh3gl2,Bin1,Rhoa,Epn1,Napa,Dnm1,Akap5,Opa1,Timm9,Timm13,Mtch2,Chchd3,Sptbn1,Immt,Prrt2,Rac1
6_Member	GO Biological Processes	GO:0010256	endomembrane system organization	-2.95578	-1.39764	18/495	24923,25012,25017,25524,25578,25716,29693,29704,59114,60374,79125,83572,116657,116743,117028,140694,305614,361651	Stx1b,Snap25,Myo5a,Psap,Ywhaz,Syt1,Atp2a2,Pacsin1,Slc9a3r1,Lmna,Anxa6,Pafah1b1,Cplx2,Sh3gl2,Bin1,Dnm1,Sptbn1,Prrt2
7_Summary	GO Biological Processes	GO:0050804	modulation of chemical synaptic transmission	-11.3829	-8.50354	38/646	24242,24245,24674,24686,24804,24923,24957,25012,25017,25152,25393,25400,25558,25716,29271,29431,29483,29495,29693,56010,56064,60324,81022,81664,81677,83629,84027,114028,116657,140694,171026,252892,259269,266777,316539,361651,363875,500446	Calm1,Camk2b,Ppp3ca,Prnp,Syp,Stx1b,Glul,Snap25,Myo5a,Map1a,Bcan,Camk2a,Stxbp1,Syt1,Cfl1,Pak1,Slc1a3,Dlg4,Atp2a2,Ywhag,Nptn,Synpo,Stxbp5,Gnai2,Itpka,Slc12a2,Gsk3b,Ctnnd2,Cplx2,Dnm1,Akap5,Lgi1,Erc2,Nptx1,Epha4,Prrt2,Rac1,Phf24
7_Member	GO Biological Processes	GO:0050804	modulation of chemical synaptic transmission	-11.3829	-8.50354	38/646	24242,24245,24674,24686,24804,24923,24957,25012,25017,25152,25393,25400,25558,25716,29271,29431,29483,29495,29693,56010,56064,60324,81022,81664,81677,83629,84027,114028,116657,140694,171026,252892,259269,266777,316539,361651,363875,500446	Calm1,Camk2b,Ppp3ca,Prnp,Syp,Stx1b,Glul,Snap25,Myo5a,Map1a,Bcan,Camk2a,Stxbp1,Syt1,Cfl1,Pak1,Slc1a3,Dlg4,Atp2a2,Ywhag,Nptn,Synpo,Stxbp5,Gnai2,Itpka,Slc12a2,Gsk3b,Ctnnd2,Cplx2,Dnm1,Akap5,Lgi1,Erc2,Nptx1,Epha4,Prrt2,Rac1,Phf24
7_Member	GO Biological Processes	GO:0099177	regulation of trans-synaptic signaling	-11.3627	-8.50354	38/647	24242,24245,24674,24686,24804,24923,24957,25012,25017,25152,25393,25400,25558,25716,29271,29431,29483,29495,29693,56010,56064,60324,81022,81664,81677,83629,84027,114028,116657,140694,171026,252892,259269,266777,316539,361651,363875,500446	Calm1,Camk2b,Ppp3ca,Prnp,Syp,Stx1b,Glul,Snap25,Myo5a,Map1a,Bcan,Camk2a,Stxbp1,Syt1,Cfl1,Pak1,Slc1a3,Dlg4,Atp2a2,Ywhag,Nptn,Synpo,Stxbp5,Gnai2,Itpka,Slc12a2,Gsk3b,Ctnnd2,Cplx2,Dnm1,Akap5,Lgi1,Erc2,Nptx1,Epha4,Prrt2,Rac1,Phf24
7_Member	GO Biological Processes	GO:0048167	regulation of synaptic plasticity	-8.13827	-5.82877	23/341	24245,24686,24804,25012,25152,25393,25400,25558,29271,29431,29495,56010,56064,60324,81677,84027,114028,116657,171026,259269,316539,361651,363875	Camk2b,Prnp,Syp,Snap25,Map1a,Bcan,Camk2a,Stxbp1,Cfl1,Pak1,Dlg4,Ywhag,Nptn,Synpo,Itpka,Gsk3b,Ctnnd2,Cplx2,Akap5,Erc2,Epha4,Prrt2,Rac1
7_Member	GO Biological Processes	GO:0048168	regulation of neuronal synaptic plasticity	-5.27638	-3.33961	9/80	24245,24804,25393,25400,29495,56064,60324,84027,363875	Camk2b,Syp,Bcan,Camk2a,Dlg4,Nptn,Synpo,Gsk3b,Rac1
7_Member	GO Biological Processes	GO:0050806	positive regulation of synaptic transmission	-4.10262	-2.3574	15/292	24245,24686,24923,24957,25012,25558,25716,29431,29483,29495,56064,84027,171026,252892,316539	Camk2b,Prnp,Stx1b,Glul,Snap25,Stxbp1,Syt1,Pak1,Slc1a3,Dlg4,Nptn,Gsk3b,Akap5,Lgi1,Epha4
7_Member	GO Biological Processes	GO:0048169	regulation of long-term neuronal synaptic plasticity	-3.53308	-1.87804	5/37	24245,24804,29495,56064,60324	Camk2b,Syp,Dlg4,Nptn,Synpo
8_Summary	GO Biological Processes	GO:0007005	mitochondrion organization	-10.7187	-7.96426	33/523	24242,25176,25400,25578,29539,50558,60374,60465,63864,81757,83529,83531,84027,85333,114562,114766,171116,171139,252928,266777,288088,293991,294964,295922,296966,297990,298762,299739,301458,312444,312890,315167,362245,24468	Calm1,Slc25a5,Camk2a,Ywhaz,Aldh2,Npepps,Lmna,Cttn,Hsd17b10,Rala,Vdac1,Vdac2,Gsk3b,Slc25a4,Cdc37,Phb2,Opa1,Timm9,Timm13,Nptx1,Ndufb4,Ndufb8,Ndufb5,Mtch2,Chchd3,Ndufb6,Cox7a2l,Ndufa12,Ndufs1,Immt,Gdap1,Ndufa6,Map1lc3a,Hspa8
8_Member	GO Biological Processes	GO:0007005	mitochondrion organization	-10.7187	-7.96426	33/523	24242,25176,25400,25578,29539,50558,60374,60465,63864,81757,83529,83531,84027,85333,114562,114766,171116,171139,252928,266777,288088,293991,294964,295922,296966,297990,298762,299739,301458,312444,312890,315167,362245	Calm1,Slc25a5,Camk2a,Ywhaz,Aldh2,Npepps,Lmna,Cttn,Hsd17b10,Rala,Vdac1,Vdac2,Gsk3b,Slc25a4,Cdc37,Phb2,Opa1,Timm9,Timm13,Nptx1,Ndufb4,Ndufb8,Ndufb5,Mtch2,Chchd3,Ndufb6,Cox7a2l,Ndufa12,Ndufs1,Immt,Gdap1,Ndufa6,Map1lc3a
8_Member	GO Biological Processes	GO:0007006	mitochondrial membrane organization	-6.83395	-4.65355	12/107	24242,25176,25400,83531,84027,85333,171116,171139,252928,295922,296966,312444	Calm1,Slc25a5,Camk2a,Vdac2,Gsk3b,Slc25a4,Opa1,Timm9,Timm13,Mtch2,Chchd3,Immt
8_Member	GO Biological Processes	GO:0008637	apoptotic mitochondrial changes	-5.61708	-3.61961	11/115	25176,25400,29539,60374,83531,84027,85333,171116,266777,295922,301458	Slc25a5,Camk2a,Aldh2,Lmna,Vdac2,Gsk3b,Slc25a4,Opa1,Nptx1,Mtch2,Ndufs1
8_Member	GO Biological Processes	GO:1902108	regulation of mitochondrial membrane permeability involved in apoptotic process	-4.2834	-2.49843	6/42	25176,25400,83531,84027,85333,295922	Slc25a5,Camk2a,Vdac2,Gsk3b,Slc25a4,Mtch2
8_Member	GO Biological Processes	GO:0090559	regulation of membrane permeability	-3.73982	-2.0541	7/74	24468,25176,25400,83531,84027,85333,295922	Hspa8,Slc25a5,Camk2a,Vdac2,Gsk3b,Slc25a4,Mtch2
8_Member	GO Biological Processes	GO:0046902	regulation of mitochondrial membrane permeability	-3.48913	-1.84143	6/58	25176,25400,83531,84027,85333,295922	Slc25a5,Camk2a,Vdac2,Gsk3b,Slc25a4,Mtch2
9_Summary	GO Biological Processes	GO:0099072	regulation of postsynaptic membrane neurotransmitter receptor levels	-10.6088	-7.89855	15/94	24923,25012,25400,29177,29495,29704,29753,58948,64053,84027,116563,140670,171026,252892,266777,56064,58945,114612,117280,25152	Stx1b,Snap25,Camk2a,Hpca,Dlg4,Pacsin1,Ywhae,Dlg3,Dlg2,Gsk3b,Ap2m1,Ap2b1,Akap5,Lgi1,Nptx1,Nptn,Dynll1,Ddx39b,Hnrnpu,Map1a
9_Member	GO Biological Processes	GO:0099072	regulation of postsynaptic membrane neurotransmitter receptor levels	-10.6088	-7.89855	15/94	24923,25012,25400,29177,29495,29704,29753,58948,64053,84027,116563,140670,171026,252892,266777	Stx1b,Snap25,Camk2a,Hpca,Dlg4,Pacsin1,Ywhae,Dlg3,Dlg2,Gsk3b,Ap2m1,Ap2b1,Akap5,Lgi1,Nptx1
9_Member	GO Biological Processes	GO:0031503	protein-containing complex localization	-6.77717	-4.60901	18/255	24923,25012,25400,29177,29495,29704,56064,58945,58948,64053,84027,114612,116563,117280,140670,171026,252892,266777	Stx1b,Snap25,Camk2a,Hpca,Dlg4,Pacsin1,Nptn,Dynll1,Dlg3,Dlg2,Gsk3b,Ddx39b,Ap2m1,Hnrnpu,Ap2b1,Akap5,Lgi1,Nptx1
9_Member	GO Biological Processes	GO:0097120	receptor localization to synapse	-6.49834	-4.35366	10/75	24923,25012,25400,29495,56064,58948,64053,84027,252892,266777	Stx1b,Snap25,Camk2a,Dlg4,Nptn,Dlg3,Dlg2,Gsk3b,Lgi1,Nptx1
9_Member	GO Biological Processes	GO:1903539	protein localization to postsynaptic membrane	-5.6004	-3.60833	8/55	24923,25012,25400,29495,64053,84027,252892,266777	Stx1b,Snap25,Camk2a,Dlg4,Dlg2,Gsk3b,Lgi1,Nptx1
9_Member	GO Biological Processes	GO:0062237	protein localization to postsynapse	-5.53948	-3.558	8/56	24923,25012,25400,29495,64053,84027,252892,266777	Stx1b,Snap25,Camk2a,Dlg4,Dlg2,Gsk3b,Lgi1,Nptx1
9_Member	GO Biological Processes	GO:0099633	protein localization to postsynaptic specialization membrane	-5.15949	-3.25276	6/30	25400,29495,64053,84027,252892,266777	Camk2a,Dlg4,Dlg2,Gsk3b,Lgi1,Nptx1
9_Member	GO Biological Processes	GO:0099645	neurotransmitter receptor localization to postsynaptic specialization membrane	-5.15949	-3.25276	6/30	25400,29495,64053,84027,252892,266777	Camk2a,Dlg4,Dlg2,Gsk3b,Lgi1,Nptx1
9_Member	GO Biological Processes	GO:0035418	protein localization to synapse	-5.0574	-3.16331	9/85	24923,25012,25152,25400,29495,64053,84027,252892,266777	Stx1b,Snap25,Map1a,Camk2a,Dlg4,Dlg2,Gsk3b,Lgi1,Nptx1
9_Member	GO Biological Processes	GO:1902414	protein localization to cell junction	-3.9204	-2.21435	9/118	24923,25012,25152,25400,29495,64053,84027,252892,266777	Stx1b,Snap25,Map1a,Camk2a,Dlg4,Dlg2,Gsk3b,Lgi1,Nptx1
10_Summary	GO Biological Processes	GO:0036465	synaptic vesicle recycling	-10.1304	-7.55207	14/85	24242,24468,24804,24923,25716,29704,89816,116561,116563,116638,116743,117028,140670,140694,24674,25012,25416,29177,29364,29495,60465,65046,79434,83527,83800,117277,171026,191575,312694,317396,363875,499903	Calm1,Hspa8,Syp,Stx1b,Syt1,Pacsin1,Picalm,Cltb,Ap2m1,Slc17a7,Sh3gl2,Bin1,Ap2b1,Dnm1,Ppp3ca,Snap25,Dpysl2,Hpca,Cd47,Dlg4,Cttn,Ap2s1,Rab11b,Dbnl,Clta,Epn1,Akap5,Nme1,Necap1,Ubqln2,Rac1,Napb
10_Member	GO Biological Processes	GO:0036465	synaptic vesicle recycling	-10.1304	-7.55207	14/85	24242,24468,24804,24923,25716,29704,89816,116561,116563,116638,116743,117028,140670,140694	Calm1,Hspa8,Syp,Stx1b,Syt1,Pacsin1,Picalm,Cltb,Ap2m1,Slc17a7,Sh3gl2,Bin1,Ap2b1,Dnm1
10_Member	GO Biological Processes	GO:0048488	synaptic vesicle endocytosis	-9.81252	-7.29217	13/74	24242,24468,24804,25716,29704,89816,116561,116563,116638,116743,117028,140670,140694	Calm1,Hspa8,Syp,Syt1,Pacsin1,Picalm,Cltb,Ap2m1,Slc17a7,Sh3gl2,Bin1,Ap2b1,Dnm1
10_Member	GO Biological Processes	GO:0140238	presynaptic endocytosis	-9.81252	-7.29217	13/74	24242,24468,24804,25716,29704,89816,116561,116563,116638,116743,117028,140670,140694	Calm1,Hspa8,Syp,Syt1,Pacsin1,Picalm,Cltb,Ap2m1,Slc17a7,Sh3gl2,Bin1,Ap2b1,Dnm1
10_Member	GO Biological Processes	GO:0006897	endocytosis	-9.23239	-6.77899	32/564	24242,24468,24674,24804,24923,25012,25416,25716,29177,29364,29495,29704,60465,65046,79434,83527,83800,89816,116561,116563,116638,116743,117028,117277,140670,140694,171026,191575,312694,317396,363875,499903	Calm1,Hspa8,Ppp3ca,Syp,Stx1b,Snap25,Dpysl2,Syt1,Hpca,Cd47,Dlg4,Pacsin1,Cttn,Ap2s1,Rab11b,Dbnl,Clta,Picalm,Cltb,Ap2m1,Slc17a7,Sh3gl2,Bin1,Epn1,Ap2b1,Dnm1,Akap5,Nme1,Necap1,Ubqln2,Rac1,Napb
10_Member	GO Biological Processes	GO:0072583	clathrin-dependent endocytosis	-6.29207	-4.17684	8/45	65046,83800,89816,116561,116563,116743,140670,317396	Ap2s1,Clta,Picalm,Cltb,Ap2m1,Sh3gl2,Ap2b1,Ubqln2
10_Member	GO Biological Processes	GO:0006898	receptor-mediated endocytosis	-6.0833	-3.99565	17/255	25012,29177,29495,29704,60465,65046,83527,83800,89816,116561,116563,116743,140670,140694,171026,317396,499903	Snap25,Hpca,Dlg4,Pacsin1,Cttn,Ap2s1,Dbnl,Clta,Picalm,Cltb,Ap2m1,Sh3gl2,Ap2b1,Dnm1,Akap5,Ubqln2,Napb
10_Member	GO Biological Processes	GO:0030100	regulation of endocytosis	-5.80573	-3.7613	16/238	24242,24674,24923,29177,29495,29704,89816,116563,116638,116743,117028,140670,140694,171026,317396,499903	Calm1,Ppp3ca,Stx1b,Hpca,Dlg4,Pacsin1,Picalm,Ap2m1,Slc17a7,Sh3gl2,Bin1,Ap2b1,Dnm1,Akap5,Ubqln2,Napb
10_Member	GO Biological Processes	GO:0031623	receptor internalization	-5.66847	-3.65281	12/137	25012,29177,29495,29704,89816,116563,116743,140670,140694,171026,317396,499903	Snap25,Hpca,Dlg4,Pacsin1,Picalm,Ap2m1,Sh3gl2,Ap2b1,Dnm1,Akap5,Ubqln2,Napb
10_Member	GO Biological Processes	GO:1903421	regulation of synaptic vesicle recycling	-4.82781	-2.95866	6/34	24242,24923,89816,116563,116638,140694	Calm1,Stx1b,Picalm,Ap2m1,Slc17a7,Dnm1
10_Member	GO Biological Processes	GO:0043112	receptor metabolic process	-4.73624	-2.87509	13/197	25012,29177,29495,29704,79434,89816,116563,116743,140670,140694,171026,317396,499903	Snap25,Hpca,Dlg4,Pacsin1,Rab11b,Picalm,Ap2m1,Sh3gl2,Ap2b1,Dnm1,Akap5,Ubqln2,Napb
10_Member	GO Biological Processes	GO:0099590	neurotransmitter receptor internalization	-4.60764	-2.76967	6/37	25012,29177,29704,116563,140670,171026	Snap25,Hpca,Pacsin1,Ap2m1,Ap2b1,Akap5
10_Member	GO Biological Processes	GO:0002090	regulation of receptor internalization	-4.45408	-2.63451	8/78	29177,29495,29704,116563,116743,171026,317396,499903	Hpca,Dlg4,Pacsin1,Ap2m1,Sh3gl2,Akap5,Ubqln2,Napb
10_Member	GO Biological Processes	GO:1900242	regulation of synaptic vesicle endocytosis	-4.2918	-2.50183	5/26	24242,89816,116563,116638,140694	Calm1,Picalm,Ap2m1,Slc17a7,Dnm1
10_Member	GO Biological Processes	GO:0098884	postsynaptic neurotransmitter receptor internalization	-3.97884	-2.25438	5/30	29177,29704,116563,140670,171026	Hpca,Pacsin1,Ap2m1,Ap2b1,Akap5
10_Member	GO Biological Processes	GO:0140239	postsynaptic endocytosis	-3.97884	-2.25438	5/30	29177,29704,116563,140670,171026	Hpca,Pacsin1,Ap2m1,Ap2b1,Akap5
11_Summary	GO Biological Processes	GO:0043254	regulation of protein-containing complex assembly	-9.58585	-7.10026	29/454	24171,24851,24923,25558,25595,25617,29271,29431,60465,64303,81022,81732,83427,83527,83531,84027,117028,117273,117277,140654,140673,297518,298848,305614,361651,363875,493810,499903,683788,24245,24818,25176,25716,29364,29374,29489,29542,58945,60324,79256,81757,83529,85333,171116,288305,727679,24242,24468,25152,29693,83572,114562,114766,116743,171026,316539,362245,117280,360678,361069,25017,29275,29…	Add2,Tpm1,Stx1b,Stxbp1,Map2,Hspa5,Cfl1,Pak1,Cttn,Pfn1,Stxbp5,Actr3,Rack1,Dbnl,Vdac2,Gsk3b,Bin1,Rhoa,Epn1,Rps3,Napa,Arpc4,Mapre3,Sptbn1,Prrt2,Rac1,Capza2,Napb,Fscn1,Camk2b,Tcp1,Slc25a5,Syt1,Cd47,Cct4,Dync1h1,Pebp1,Dynll1,Synpo,Hnrnpd,Rala,Vdac1,Slc25a4,Opa1,Cct8,Pdxp,Calm1,Hspa8,Map1a,Atp2a2,Pafah1b1,Cdc37,Phb2,Sh3gl2,Akap5,Epha4,Map1lc3a,Hnrnpu,Arhgdia,Dmtn,Myo5a,Actc1,Pacsin1,Slc9a3r1,Calr,Itpka…
11_Member	GO Biological Processes	GO:0043254	regulation of protein-containing complex assembly	-9.58585	-7.10026	29/454	24171,24851,24923,25558,25595,25617,29271,29431,60465,64303,81022,81732,83427,83527,83531,84027,117028,117273,117277,140654,140673,297518,298848,305614,361651,363875,493810,499903,683788	Add2,Tpm1,Stx1b,Stxbp1,Map2,Hspa5,Cfl1,Pak1,Cttn,Pfn1,Stxbp5,Actr3,Rack1,Dbnl,Vdac2,Gsk3b,Bin1,Rhoa,Epn1,Rps3,Napa,Arpc4,Mapre3,Sptbn1,Prrt2,Rac1,Capza2,Napb,Fscn1
11_Member	GO Biological Processes	GO:0010638	positive regulation of organelle organization	-9.37567	-6.89835	31/525	24245,24818,24851,25176,25716,29271,29364,29374,29431,29489,29542,58945,60324,60465,64303,79256,81732,81757,83529,84027,85333,117028,117273,140654,171116,288305,297518,361651,363875,683788,727679	Camk2b,Tcp1,Tpm1,Slc25a5,Syt1,Cfl1,Cd47,Cct4,Pak1,Dync1h1,Pebp1,Dynll1,Synpo,Cttn,Pfn1,Hnrnpd,Actr3,Rala,Vdac1,Gsk3b,Slc25a4,Bin1,Rhoa,Rps3,Opa1,Cct8,Arpc4,Prrt2,Rac1,Fscn1,Pdxp
11_Member	GO Biological Processes	GO:0022411	cellular component disassembly	-8.48328	-6.13295	26/414	24171,24242,24468,24851,25152,25176,25595,29271,29693,60465,83527,83529,83572,85333,114562,114766,116743,140673,171026,305614,316539,362245,493810,499903,683788,727679	Add2,Calm1,Hspa8,Tpm1,Map1a,Slc25a5,Map2,Cfl1,Atp2a2,Cttn,Dbnl,Vdac1,Pafah1b1,Slc25a4,Cdc37,Phb2,Sh3gl2,Napa,Akap5,Sptbn1,Epha4,Map1lc3a,Capza2,Napb,Fscn1,Pdxp
11_Member	GO Biological Processes	GO:0032271	regulation of protein polymerization	-7.28599	-5.06213	18/236	24171,24851,25595,29271,29431,60465,64303,81732,83527,83531,117028,117273,140654,297518,298848,305614,363875,493810	Add2,Tpm1,Map2,Cfl1,Pak1,Cttn,Pfn1,Actr3,Dbnl,Vdac2,Bin1,Rhoa,Rps3,Arpc4,Mapre3,Sptbn1,Rac1,Capza2
11_Member	GO Biological Processes	GO:0051493	regulation of cytoskeleton organization	-7.19007	-4.98412	28/546	24171,24851,25152,25595,29271,29364,29431,29489,60324,60465,64303,81732,83527,83572,84027,117028,117273,117280,140654,297518,298848,305614,360678,361069,363875,493810,683788,727679	Add2,Tpm1,Map1a,Map2,Cfl1,Cd47,Pak1,Dync1h1,Synpo,Cttn,Pfn1,Actr3,Dbnl,Pafah1b1,Gsk3b,Bin1,Rhoa,Hnrnpu,Rps3,Arpc4,Mapre3,Sptbn1,Arhgdia,Dmtn,Rac1,Capza2,Fscn1,Pdxp
11_Member	GO Biological Processes	GO:0043624	cellular protein complex disassembly	-6.89747	-4.71291	14/149	24171,24468,24851,25152,25595,29271,83527,116743,140673,171026,305614,493810,499903,727679	Add2,Hspa8,Tpm1,Map1a,Map2,Cfl1,Dbnl,Sh3gl2,Napa,Akap5,Sptbn1,Capza2,Napb,Pdxp
11_Member	GO Biological Processes	GO:0032984	protein-containing complex disassembly	-6.79745	-4.62525	17/227	24171,24242,24468,24851,25152,25595,29271,29693,83527,116743,140673,171026,305614,362245,493810,499903,727679	Add2,Calm1,Hspa8,Tpm1,Map1a,Map2,Cfl1,Atp2a2,Dbnl,Sh3gl2,Napa,Akap5,Sptbn1,Map1lc3a,Capza2,Napb,Pdxp
11_Member	GO Biological Processes	GO:1902903	regulation of supramolecular fiber organization	-6.38787	-4.25447	22/393	24171,24468,24851,25152,25595,29271,29364,29431,60324,60465,64303,81732,83527,117028,117273,140654,297518,298848,305614,363875,493810,727679	Add2,Hspa8,Tpm1,Map1a,Map2,Cfl1,Cd47,Pak1,Synpo,Cttn,Pfn1,Actr3,Dbnl,Bin1,Rhoa,Rps3,Arpc4,Mapre3,Sptbn1,Rac1,Capza2,Pdxp
11_Member	GO Biological Processes	GO:0030036	actin cytoskeleton organization	-6.18501	-4.08722	31/723	24171,24245,24851,25017,29271,29275,29364,29431,29704,59114,60324,60465,64202,64303,81677,81732,81757,83527,83572,116653,117028,117273,297518,305614,309557,360678,361069,363875,493810,683788,727679	Add2,Camk2b,Tpm1,Myo5a,Cfl1,Actc1,Cd47,Pak1,Pacsin1,Slc9a3r1,Synpo,Cttn,Calr,Pfn1,Itpka,Actr3,Rala,Dbnl,Pafah1b1,Cap2,Bin1,Rhoa,Arpc4,Sptbn1,Epb41l2,Arhgdia,Dmtn,Rac1,Capza2,Fscn1,Pdxp
11_Member	GO Biological Processes	GO:0031333	negative regulation of protein-containing complex assembly	-6.00817	-3.93043	13/151	24171,24851,25558,25595,25617,29271,64303,83527,83531,84027,305614,361651,493810	Add2,Tpm1,Stxbp1,Map2,Hspa5,Cfl1,Pfn1,Dbnl,Vdac2,Gsk3b,Sptbn1,Prrt2,Capza2
11_Member	GO Biological Processes	GO:0032970	regulation of actin filament-based process	-5.93884	-3.86784	22/418	24171,24211,24851,29271,29364,29431,29693,60324,60465,64303,81732,83527,117028,117273,297518,305614,360678,361069,363875,493810,683788,727679	Add2,Atp1a1,Tpm1,Cfl1,Cd47,Pak1,Atp2a2,Synpo,Cttn,Pfn1,Actr3,Dbnl,Bin1,Rhoa,Arpc4,Sptbn1,Arhgdia,Dmtn,Rac1,Capza2,Fscn1,Pdxp
11_Member	GO Biological Processes	GO:0051258	protein polymerization	-5.80875	-3.7613	18/297	24171,24851,25595,29271,29431,60465,64303,81732,83527,83531,117028,117273,140654,297518,298848,305614,363875,493810	Add2,Tpm1,Map2,Cfl1,Pak1,Cttn,Pfn1,Actr3,Dbnl,Vdac2,Bin1,Rhoa,Rps3,Arpc4,Mapre3,Sptbn1,Rac1,Capza2
11_Member	GO Biological Processes	GO:0032956	regulation of actin cytoskeleton organization	-5.62197	-3.61961	20/370	24171,24851,29271,29364,29431,60324,60465,64303,81732,83527,117028,117273,297518,305614,360678,361069,363875,493810,683788,727679	Add2,Tpm1,Cfl1,Cd47,Pak1,Synpo,Cttn,Pfn1,Actr3,Dbnl,Bin1,Rhoa,Arpc4,Sptbn1,Arhgdia,Dmtn,Rac1,Capza2,Fscn1,Pdxp
11_Member	GO Biological Processes	GO:0008064	regulation of actin polymerization or depolymerization	-5.61351	-3.61875	14/190	24171,24851,29271,60465,64303,81732,83527,117028,117273,297518,305614,363875,493810,727679	Add2,Tpm1,Cfl1,Cttn,Pfn1,Actr3,Dbnl,Bin1,Rhoa,Arpc4,Sptbn1,Rac1,Capza2,Pdxp
11_Member	GO Biological Processes	GO:0030832	regulation of actin filament length	-5.55998	-3.57323	14/192	24171,24851,29271,60465,64303,81732,83527,117028,117273,297518,305614,363875,493810,727679	Add2,Tpm1,Cfl1,Cttn,Pfn1,Actr3,Dbnl,Bin1,Rhoa,Arpc4,Sptbn1,Rac1,Capza2,Pdxp
11_Member	GO Biological Processes	GO:0110053	regulation of actin filament organization	-5.54797	-3.56387	17/279	24171,24851,29271,29364,29431,60324,60465,64303,81732,83527,117028,117273,297518,305614,363875,493810,727679	Add2,Tpm1,Cfl1,Cd47,Pak1,Synpo,Cttn,Pfn1,Actr3,Dbnl,Bin1,Rhoa,Arpc4,Sptbn1,Rac1,Capza2,Pdxp
11_Member	GO Biological Processes	GO:0007015	actin filament organization	-5.41617	-3.45722	22/450	24171,24851,25017,29271,29275,29364,29431,29704,60324,60465,64303,81732,83527,117028,117273,297518,305614,361069,363875,493810,683788,727679	Add2,Tpm1,Myo5a,Cfl1,Actc1,Cd47,Pak1,Pacsin1,Synpo,Cttn,Pfn1,Actr3,Dbnl,Bin1,Rhoa,Arpc4,Sptbn1,Dmtn,Rac1,Capza2,Fscn1,Pdxp
11_Member	GO Biological Processes	GO:0030833	regulation of actin filament polymerization	-5.37407	-3.4229	13/172	24171,24851,29271,60465,64303,81732,83527,117028,117273,297518,305614,363875,493810	Add2,Tpm1,Cfl1,Cttn,Pfn1,Actr3,Dbnl,Bin1,Rhoa,Arpc4,Sptbn1,Rac1,Capza2
11_Member	GO Biological Processes	GO:0097435	supramolecular fiber organization	-5.33158	-3.38767	30/755	24171,24468,24851,25017,25152,25595,29271,29275,29364,29431,29489,29704,60324,60465,64303,81732,83527,83572,117028,117273,140654,297518,298848,301252,305614,361069,363875,493810,683788,727679	Add2,Hspa8,Tpm1,Myo5a,Map1a,Map2,Cfl1,Actc1,Cd47,Pak1,Dync1h1,Pacsin1,Synpo,Cttn,Pfn1,Actr3,Dbnl,Pafah1b1,Bin1,Rhoa,Rps3,Arpc4,Mapre3,Hsp90ab1,Sptbn1,Dmtn,Rac1,Capza2,Fscn1,Pdxp
11_Member	GO Biological Processes	GO:0051495	positive regulation of cytoskeleton organization	-5.27066	-3.33625	15/232	24851,29271,29364,29431,29489,60324,60465,64303,81732,117028,117273,140654,297518,363875,727679	Tpm1,Cfl1,Cd47,Pak1,Dync1h1,Synpo,Cttn,Pfn1,Actr3,Bin1,Rhoa,Rps3,Arpc4,Rac1,Pdxp
11_Member	GO Biological Processes	GO:0051017	actin filament bundle assembly	-5.23737	-3.31453	13/177	24171,24851,29271,29364,29431,60324,64303,83527,117273,361069,363875,683788,727679	Add2,Tpm1,Cfl1,Cd47,Pak1,Synpo,Pfn1,Dbnl,Rhoa,Dmtn,Rac1,Fscn1,Pdxp
11_Member	GO Biological Processes	GO:0051261	protein depolymerization	-5.1629	-3.25276	11/128	24171,24468,24851,25152,25595,29271,83527,116743,305614,493810,727679	Add2,Hspa8,Tpm1,Map1a,Map2,Cfl1,Dbnl,Sh3gl2,Sptbn1,Capza2,Pdxp
11_Member	GO Biological Processes	GO:0061572	actin filament bundle organization	-5.15768	-3.25276	13/180	24171,24851,29271,29364,29431,60324,64303,83527,117273,361069,363875,683788,727679	Add2,Tpm1,Cfl1,Cd47,Pak1,Synpo,Pfn1,Dbnl,Rhoa,Dmtn,Rac1,Fscn1,Pdxp
11_Member	GO Biological Processes	GO:0032272	negative regulation of protein polymerization	-5.14309	-3.24036	9/83	24171,24851,25595,29271,64303,83527,83531,305614,493810	Add2,Tpm1,Map2,Cfl1,Pfn1,Dbnl,Vdac2,Sptbn1,Capza2
11_Member	GO Biological Processes	GO:1902905	positive regulation of supramolecular fiber organization	-5.03784	-3.148	14/213	24851,29271,29364,29431,60324,60465,64303,81732,117028,117273,140654,297518,363875,727679	Tpm1,Cfl1,Cd47,Pak1,Synpo,Cttn,Pfn1,Actr3,Bin1,Rhoa,Rps3,Arpc4,Rac1,Pdxp
11_Member	GO Biological Processes	GO:0030041	actin filament polymerization	-4.90387	-3.02129	13/190	24171,24851,29271,60465,64303,81732,83527,117028,117273,297518,305614,363875,493810	Add2,Tpm1,Cfl1,Cttn,Pfn1,Actr3,Dbnl,Bin1,Rhoa,Arpc4,Sptbn1,Rac1,Capza2
11_Member	GO Biological Processes	GO:0008154	actin polymerization or depolymerization	-4.90081	-3.02129	14/219	24171,24851,29271,60465,64303,81732,83527,117028,117273,297518,305614,363875,493810,727679	Add2,Tpm1,Cfl1,Cttn,Pfn1,Actr3,Dbnl,Bin1,Rhoa,Arpc4,Sptbn1,Rac1,Capza2,Pdxp
11_Member	GO Biological Processes	GO:1901879	regulation of protein depolymerization	-4.62591	-2.78605	9/96	24171,24851,25152,25595,29271,83527,305614,493810,727679	Add2,Tpm1,Map1a,Map2,Cfl1,Dbnl,Sptbn1,Capza2,Pdxp
11_Member	GO Biological Processes	GO:0030834	regulation of actin filament depolymerization	-4.47209	-2.6489	7/57	24171,24851,29271,83527,305614,493810,727679	Add2,Tpm1,Cfl1,Dbnl,Sptbn1,Capza2,Pdxp
11_Member	GO Biological Processes	GO:1901880	negative regulation of protein depolymerization	-4.33479	-2.53974	8/81	24171,24851,25152,25595,29271,83527,305614,493810	Add2,Tpm1,Map1a,Map2,Cfl1,Dbnl,Sptbn1,Capza2
11_Member	GO Biological Processes	GO:0051693	actin filament capping	-4.2834	-2.49843	6/42	24171,24851,29271,83527,305614,493810	Add2,Tpm1,Cfl1,Dbnl,Sptbn1,Capza2
11_Member	GO Biological Processes	GO:0030042	actin filament depolymerization	-4.23219	-2.45548	7/62	24171,24851,29271,83527,305614,493810,727679	Add2,Tpm1,Cfl1,Dbnl,Sptbn1,Capza2,Pdxp
11_Member	GO Biological Processes	GO:0030837	negative regulation of actin filament polymerization	-4.01424	-2.28247	7/67	24171,24851,29271,64303,83527,305614,493810	Add2,Tpm1,Cfl1,Pfn1,Dbnl,Sptbn1,Capza2
11_Member	GO Biological Processes	GO:0043242	negative regulation of protein-containing complex disassembly	-3.97274	-2.25116	8/91	24171,24851,25152,25595,29271,83527,305614,493810	Add2,Tpm1,Map1a,Map2,Cfl1,Dbnl,Sptbn1,Capza2
11_Member	GO Biological Processes	GO:0044089	positive regulation of cellular component biogenesis	-3.95735	-2.2372	22/561	24851,29271,29364,29431,29448,29489,58945,60324,60465,64303,81732,81757,83427,84027,117028,117273,117277,140654,297518,306439,363875,683788	Tpm1,Cfl1,Cd47,Pak1,Rab7a,Dync1h1,Dynll1,Synpo,Cttn,Pfn1,Actr3,Rala,Rack1,Gsk3b,Bin1,Rhoa,Epn1,Rps3,Arpc4,Gpm6a,Rac1,Fscn1
11_Member	GO Biological Processes	GO:0030835	negative regulation of actin filament depolymerization	-3.94928	-2.23483	6/48	24171,24851,29271,83527,305614,493810	Add2,Tpm1,Cfl1,Dbnl,Sptbn1,Capza2
11_Member	GO Biological Processes	GO:0031334	positive regulation of protein-containing complex assembly	-3.71427	-2.03258	13/248	29431,60465,64303,81732,83427,84027,117028,117273,117277,140654,297518,363875,683788	Pak1,Cttn,Pfn1,Actr3,Rack1,Gsk3b,Bin1,Rhoa,Epn1,Rps3,Arpc4,Rac1,Fscn1
11_Member	GO Biological Processes	GO:0043244	regulation of protein-containing complex disassembly	-3.62657	-1.96155	9/129	24171,24851,25152,25595,29271,83527,305614,493810,727679	Add2,Tpm1,Map1a,Map2,Cfl1,Dbnl,Sptbn1,Capza2,Pdxp
11_Member	GO Biological Processes	GO:0032273	positive regulation of protein polymerization	-3.45571	-1.81042	9/136	29431,60465,64303,81732,117028,117273,140654,297518,363875	Pak1,Cttn,Pfn1,Actr3,Bin1,Rhoa,Rps3,Arpc4,Rac1
11_Member	GO Biological Processes	GO:0032231	regulation of actin filament bundle assembly	-3.32455	-1.70955	8/113	24851,29271,29364,29431,60324,64303,117273,363875	Tpm1,Cfl1,Cd47,Pak1,Synpo,Pfn1,Rhoa,Rac1
11_Member	GO Biological Processes	GO:1902904	negative regulation of supramolecular fiber organization	-3.26945	-1.66004	10/175	24171,24468,24851,25152,25595,29271,64303,83527,305614,493810	Add2,Hspa8,Tpm1,Map1a,Map2,Cfl1,Pfn1,Dbnl,Sptbn1,Capza2
11_Member	GO Biological Processes	GO:0010639	negative regulation of organelle organization	-3.12927	-1.54194	15/360	24171,24851,25152,25176,25558,25595,29271,60374,64303,83527,117280,171116,305614,361651,493810	Add2,Tpm1,Map1a,Slc25a5,Stxbp1,Map2,Cfl1,Lmna,Pfn1,Dbnl,Hnrnpu,Opa1,Sptbn1,Prrt2,Capza2
12_Summary	GO Biological Processes	GO:0044282	small molecule catabolic process	-9.21033	-6.33096	21/347	24333,24334,24401,25721,29539,60416,63864,64157,64192,64473,65152,78959,79131,171155,290029,290401,299201,361215,681913,690163,727679,24380,29592,29600,94173,361596,24957,25104,298596,29483,58835	Eno1,Eno2,Got1,Got2,Aldh2,Pfkp,Hsd17b10,Ddah1,Qdpr,Bpnt1,Pfkm,Akr1a1,Fabp3,Hadhb,Pnp,Esd,Dlst,Auh,Gstz1,Oxct1,Pdxp,Gad2,Bcat1,Atp2b4,Idh3b,Idh2,Glul,Pc,Sdhb,Slc1a3,Phgdh
12_Member	GO Biological Processes	GO:0044282	small molecule catabolic process	-9.21033	-6.33096	21/347	24333,24334,24401,25721,29539,60416,63864,64157,64192,64473,65152,78959,79131,171155,290029,290401,299201,361215,681913,690163,727679	Eno1,Eno2,Got1,Got2,Aldh2,Pfkp,Hsd17b10,Ddah1,Qdpr,Bpnt1,Pfkm,Akr1a1,Fabp3,Hadhb,Pnp,Esd,Dlst,Auh,Gstz1,Oxct1,Pdxp
12_Member	GO Biological Processes	GO:0009063	cellular amino acid catabolic process	-6.27034	-4.16217	11/99	24380,24401,25721,29592,29600,63864,64157,64192,299201,361215,681913	Gad2,Got1,Got2,Bcat1,Atp2b4,Hsd17b10,Ddah1,Qdpr,Dlst,Auh,Gstz1
12_Member	GO Biological Processes	GO:1901606	alpha-amino acid catabolic process	-5.41577	-3.45722	9/77	24380,24401,25721,29600,63864,64157,64192,299201,681913	Gad2,Got1,Got2,Atp2b4,Hsd17b10,Ddah1,Qdpr,Dlst,Gstz1
12_Member	GO Biological Processes	GO:0006103	2-oxoglutarate metabolic process	-5.26696	-3.33509	5/17	24401,25721,94173,299201,361596	Got1,Got2,Idh3b,Dlst,Idh2
12_Member	GO Biological Processes	GO:0046395	carboxylic acid catabolic process	-4.74705	-2.88392	14/226	24380,24401,25721,29592,29600,63864,64157,64192,78959,79131,171155,299201,361215,681913	Gad2,Got1,Got2,Bcat1,Atp2b4,Hsd17b10,Ddah1,Qdpr,Akr1a1,Fabp3,Hadhb,Dlst,Auh,Gstz1
12_Member	GO Biological Processes	GO:0016054	organic acid catabolic process	-4.70427	-2.84707	14/228	24380,24401,25721,29592,29600,63864,64157,64192,78959,79131,171155,299201,361215,681913	Gad2,Got1,Got2,Bcat1,Atp2b4,Hsd17b10,Ddah1,Qdpr,Akr1a1,Fabp3,Hadhb,Dlst,Auh,Gstz1
12_Member	GO Biological Processes	GO:0043648	dicarboxylic acid metabolic process	-4.62591	-2.78605	9/96	24380,24401,24957,25104,25721,94173,298596,299201,361596	Gad2,Got1,Glul,Pc,Got2,Idh3b,Sdhb,Dlst,Idh2
12_Member	GO Biological Processes	GO:0009065	glutamine family amino acid catabolic process	-4.37885	-2.57478	5/25	24380,24401,25721,29600,64157	Gad2,Got1,Got2,Atp2b4,Ddah1
12_Member	GO Biological Processes	GO:0006520	cellular amino acid metabolic process	-3.97646	-2.25344	14/266	24380,24401,24957,25721,29483,29592,29600,58835,63864,64157,64192,299201,361215,681913	Gad2,Got1,Glul,Got2,Slc1a3,Bcat1,Atp2b4,Phgdh,Hsd17b10,Ddah1,Qdpr,Dlst,Auh,Gstz1
12_Member	GO Biological Processes	GO:0008652	cellular amino acid biosynthetic process	-3.81493	-2.1212	7/72	24401,24957,25721,29483,29592,29600,58835	Got1,Glul,Got2,Slc1a3,Bcat1,Atp2b4,Phgdh
12_Member	GO Biological Processes	GO:0009064	glutamine family amino acid metabolic process	-3.77706	-2.08869	7/73	24380,24401,24957,25721,29600,58835,64157	Gad2,Got1,Glul,Got2,Atp2b4,Phgdh,Ddah1
12_Member	GO Biological Processes	GO:1901605	alpha-amino acid metabolic process	-3.69212	-2.01558	11/185	24380,24401,24957,25721,29600,58835,63864,64157,64192,299201,681913	Gad2,Got1,Glul,Got2,Atp2b4,Phgdh,Hsd17b10,Ddah1,Qdpr,Dlst,Gstz1
12_Member	GO Biological Processes	GO:0006107	oxaloacetate metabolic process	-3.63434	-2.0152	3/11	24401,25104,25721	Got1,Pc,Got2
12_Member	GO Biological Processes	GO:0009068	aspartate family amino acid catabolic process	-3.30181	-1.78327	3/14	24401,25721,299201	Got1,Got2,Dlst
12_Member	GO Biological Processes	GO:0009066	aspartate family amino acid metabolic process	-2.90662	-1.49462	4/41	24401,25721,58835,299201	Got1,Got2,Phgdh,Dlst
12_Member	GO Biological Processes	GO:0006536	glutamate metabolic process	-2.68713	-1.17307	4/34	24380,24401,24957,25721	Gad2,Got1,Glul,Got2
12_Member	GO Biological Processes	GO:1901607	alpha-amino acid biosynthetic process	-2.44274	-0.971932	5/64	24401,24957,25721,29600,58835	Got1,Glul,Got2,Atp2b4,Phgdh
13_Summary	GO Biological Processes	GO:0010770	positive regulation of cell morphogenesis involved in differentiation	-8.46297	-5.70853	8/105	24245,64202,83527,171026,171116,316539,361069,363875,29431,84027,89816,362587,25576,361596,24851,29704,60465,140654,58948	Camk2b,Calr,Dbnl,Akap5,Opa1,Epha4,Dmtn,Rac1,Pak1,Gsk3b,Picalm,Macf1,Ywhah,Idh2,Tpm1,Pacsin1,Cttn,Rps3,Dlg3
13_Member	GO Biological Processes	GO:0010770	positive regulation of cell morphogenesis involved in differentiation	-8.46297	-5.70853	8/105	24245,64202,83527,171026,171116,316539,361069,363875	Camk2b,Calr,Dbnl,Akap5,Opa1,Epha4,Dmtn,Rac1
13_Member	GO Biological Processes	GO:0010720	positive regulation of cell development	-8.07291	-5.37647	12/382	24245,29431,64202,83527,84027,89816,171026,171116,316539,361069,362587,363875	Camk2b,Pak1,Calr,Dbnl,Gsk3b,Picalm,Akap5,Opa1,Epha4,Dmtn,Macf1,Rac1
13_Member	GO Biological Processes	GO:0010769	regulation of cell morphogenesis involved in differentiation	-7.86187	-5.24007	8/125	24245,64202,83527,171026,171116,316539,361069,363875	Camk2b,Calr,Dbnl,Akap5,Opa1,Epha4,Dmtn,Rac1
13_Member	GO Biological Processes	GO:0060284	regulation of cell development	-7.64907	-5.06026	14/610	24245,25576,29431,64202,83527,84027,89816,171026,171116,316539,361069,361596,362587,363875	Camk2b,Ywhah,Pak1,Calr,Dbnl,Gsk3b,Picalm,Akap5,Opa1,Epha4,Dmtn,Idh2,Macf1,Rac1
13_Member	GO Biological Processes	GO:0022604	regulation of cell morphogenesis	-7.63122	-5.05288	11/334	24245,24851,64202,83527,89816,171026,171116,316539,361069,362587,363875	Camk2b,Tpm1,Calr,Dbnl,Picalm,Akap5,Opa1,Epha4,Dmtn,Macf1,Rac1
13_Member	GO Biological Processes	GO:0050773	regulation of dendrite development	-7.45118	-4.91717	8/141	24245,25576,29704,83527,84027,171026,171116,316539	Camk2b,Ywhah,Pacsin1,Dbnl,Gsk3b,Akap5,Opa1,Epha4
13_Member	GO Biological Processes	GO:0050767	regulation of neurogenesis	-6.29728	-4.06998	11/453	24245,25576,29431,83527,84027,89816,171026,171116,316539,361596,362587	Camk2b,Ywhah,Pak1,Dbnl,Gsk3b,Picalm,Akap5,Opa1,Epha4,Idh2,Macf1
13_Member	GO Biological Processes	GO:0050769	positive regulation of neurogenesis	-6.00245	-3.85008	9/297	24245,29431,83527,84027,89816,171026,171116,316539,362587	Camk2b,Pak1,Dbnl,Gsk3b,Picalm,Akap5,Opa1,Epha4,Macf1
13_Member	GO Biological Processes	GO:0050775	positive regulation of dendrite morphogenesis	-5.64283	-3.57796	5/60	24245,83527,171026,171116,316539	Camk2b,Dbnl,Akap5,Opa1,Epha4
13_Member	GO Biological Processes	GO:0051960	regulation of nervous system development	-5.46116	-3.42689	11/552	24245,25576,29431,83527,84027,89816,171026,171116,316539,361596,362587	Camk2b,Ywhah,Pak1,Dbnl,Gsk3b,Picalm,Akap5,Opa1,Epha4,Idh2,Macf1
13_Member	GO Biological Processes	GO:0051962	positive regulation of nervous system development	-5.3365	-3.31961	9/358	24245,29431,83527,84027,89816,171026,171116,316539,362587	Camk2b,Pak1,Dbnl,Gsk3b,Picalm,Akap5,Opa1,Epha4,Macf1
13_Member	GO Biological Processes	GO:0050772	positive regulation of axonogenesis	-4.48885	-2.65833	5/103	29431,83527,84027,89816,362587	Pak1,Dbnl,Gsk3b,Picalm,Macf1
13_Member	GO Biological Processes	GO:1900271	regulation of long-term synaptic potentiation	-4.36381	-2.5619	4/55	29431,84027,171026,316539	Pak1,Gsk3b,Akap5,Epha4
13_Member	GO Biological Processes	GO:0045773	positive regulation of axon extension	-4.30234	-2.51572	4/57	29431,83527,84027,362587	Pak1,Dbnl,Gsk3b,Macf1
13_Member	GO Biological Processes	GO:0050770	regulation of axonogenesis	-4.23963	-2.46618	6/190	29431,83527,84027,89816,316539,362587	Pak1,Dbnl,Gsk3b,Picalm,Epha4,Macf1
13_Member	GO Biological Processes	GO:0030516	regulation of axon extension	-4.1884	-2.42628	5/119	29431,60465,83527,84027,362587	Pak1,Cttn,Dbnl,Gsk3b,Macf1
13_Member	GO Biological Processes	GO:0061387	regulation of extent of cell growth	-3.94417	-2.24637	5/134	29431,60465,83527,84027,362587	Pak1,Cttn,Dbnl,Gsk3b,Macf1
13_Member	GO Biological Processes	GO:0060291	long-term synaptic potentiation	-3.0838	-1.62099	5/206	24245,29431,84027,171026,316539	Camk2b,Pak1,Gsk3b,Akap5,Epha4
13_Member	GO Biological Processes	GO:0043507	positive regulation of JUN kinase activity	-3.07718	-1.61861	3/52	29431,140654,316539	Pak1,Rps3,Epha4
13_Member	GO Biological Processes	GO:0048639	positive regulation of developmental growth	-2.96496	-1.54225	5/219	29431,83527,84027,89816,362587	Pak1,Dbnl,Gsk3b,Picalm,Macf1
13_Member	GO Biological Processes	GO:0043506	regulation of JUN kinase activity	-2.72094	-1.36507	3/69	29431,140654,316539	Pak1,Rps3,Epha4
13_Member	GO Biological Processes	GO:0043113	receptor clustering	-2.63396	-1.30043	3/74	29431,58948,171026	Pak1,Dlg3,Akap5
13_Member	GO Biological Processes	GO:0048638	regulation of developmental growth	-2.51116	-1.20554	6/404	29431,60465,83527,84027,89816,362587	Pak1,Cttn,Dbnl,Gsk3b,Picalm,Macf1
13_Member	GO Biological Processes	GO:0043405	regulation of MAP kinase activity	-2.23733	-1.01392	4/202	29431,84027,140654,316539	Pak1,Gsk3b,Rps3,Epha4
14_Summary	GO Biological Processes	GO:0032535	regulation of cellular component size	-8.14138	-5.82877	26/430	24171,24851,25416,25595,29271,29431,59114,60465,64303,81732,83527,83572,83629,84027,89816,116563,117028,117273,171373,297518,301252,305614,362587,363875,493810,727679,58948,60374,64053,79120,83427,683788,25393,25716,79559,116743,29598,85333,114612,252892,24333	Add2,Tpm1,Dpysl2,Map2,Cfl1,Pak1,Slc9a3r1,Cttn,Pfn1,Actr3,Dbnl,Pafah1b1,Slc12a2,Gsk3b,Picalm,Ap2m1,Bin1,Rhoa,Slc12a5,Arpc4,Hsp90ab1,Sptbn1,Macf1,Rac1,Capza2,Pdxp,Dlg3,Lmna,Dlg2,Arf4,Rack1,Fscn1,Bcan,Syt1,Alcam,Sh3gl2,Atp2b1,Slc25a4,Ddx39b,Lgi1,Eno1
14_Member	GO Biological Processes	GO:0032535	regulation of cellular component size	-8.14138	-5.82877	26/430	24171,24851,25416,25595,29271,29431,59114,60465,64303,81732,83527,83572,83629,84027,89816,116563,117028,117273,171373,297518,301252,305614,362587,363875,493810,727679	Add2,Tpm1,Dpysl2,Map2,Cfl1,Pak1,Slc9a3r1,Cttn,Pfn1,Actr3,Dbnl,Pafah1b1,Slc12a2,Gsk3b,Picalm,Ap2m1,Bin1,Rhoa,Slc12a5,Arpc4,Hsp90ab1,Sptbn1,Macf1,Rac1,Capza2,Pdxp
14_Member	GO Biological Processes	GO:0007163	establishment or maintenance of cell polarity	-6.82503	-4.64874	17/226	25595,29271,29431,58948,59114,60374,64053,79120,81732,83427,83572,84027,117273,301252,362587,363875,683788	Map2,Cfl1,Pak1,Dlg3,Slc9a3r1,Lmna,Dlg2,Arf4,Actr3,Rack1,Pafah1b1,Gsk3b,Rhoa,Hsp90ab1,Macf1,Rac1,Fscn1
14_Member	GO Biological Processes	GO:0008361	regulation of cell size	-6.02657	-3.94225	16/229	25416,25595,29271,29431,59114,60465,81732,83527,83572,83629,84027,117273,171373,301252,362587,363875	Dpysl2,Map2,Cfl1,Pak1,Slc9a3r1,Cttn,Actr3,Dbnl,Pafah1b1,Slc12a2,Gsk3b,Rhoa,Slc12a5,Hsp90ab1,Macf1,Rac1
14_Member	GO Biological Processes	GO:1990138	neuron projection extension	-5.80453	-3.7613	15/210	25393,25416,25595,25716,29431,60465,79559,81732,83527,83572,84027,89816,116743,301252,362587	Bcan,Dpysl2,Map2,Syt1,Pak1,Cttn,Alcam,Actr3,Dbnl,Pafah1b1,Gsk3b,Picalm,Sh3gl2,Hsp90ab1,Macf1
14_Member	GO Biological Processes	GO:0090066	regulation of anatomical structure size	-5.75615	-3.72188	27/606	24171,24851,25416,25595,29271,29431,29598,59114,60465,64303,81732,83527,83572,83629,84027,89816,116563,117028,117273,171373,297518,301252,305614,362587,363875,493810,727679	Add2,Tpm1,Dpysl2,Map2,Cfl1,Pak1,Atp2b1,Slc9a3r1,Cttn,Pfn1,Actr3,Dbnl,Pafah1b1,Slc12a2,Gsk3b,Picalm,Ap2m1,Bin1,Rhoa,Slc12a5,Arpc4,Hsp90ab1,Sptbn1,Macf1,Rac1,Capza2,Pdxp
14_Member	GO Biological Processes	GO:0048588	developmental cell growth	-5.4441	-3.48056	17/284	25393,25416,25595,25716,29431,60465,79559,81732,83527,83572,84027,85333,89816,114612,116743,301252,362587	Bcan,Dpysl2,Map2,Syt1,Pak1,Cttn,Alcam,Actr3,Dbnl,Pafah1b1,Gsk3b,Slc25a4,Picalm,Ddx39b,Sh3gl2,Hsp90ab1,Macf1
14_Member	GO Biological Processes	GO:0060560	developmental growth involved in morphogenesis	-5.4441	-3.48056	17/284	25393,25416,25595,25716,29271,29431,60465,79559,81732,83527,83572,83629,84027,89816,116743,301252,362587	Bcan,Dpysl2,Map2,Syt1,Cfl1,Pak1,Cttn,Alcam,Actr3,Dbnl,Pafah1b1,Slc12a2,Gsk3b,Picalm,Sh3gl2,Hsp90ab1,Macf1
14_Member	GO Biological Processes	GO:0048675	axon extension	-4.53825	-2.70874	11/149	25416,25595,29431,60465,79559,81732,83527,83572,84027,301252,362587	Dpysl2,Map2,Pak1,Cttn,Alcam,Actr3,Dbnl,Pafah1b1,Gsk3b,Hsp90ab1,Macf1
14_Member	GO Biological Processes	GO:0030307	positive regulation of cell growth	-4.14198	-2.38443	12/194	25716,29271,29431,83527,83572,84027,85333,89816,114612,117273,252892,362587	Syt1,Cfl1,Pak1,Dbnl,Pafah1b1,Gsk3b,Slc25a4,Picalm,Ddx39b,Rhoa,Lgi1,Macf1
14_Member	GO Biological Processes	GO:0030010	establishment of cell polarity	-3.83043	-2.13534	10/149	25595,29271,29431,59114,83427,83572,84027,117273,301252,683788	Map2,Cfl1,Pak1,Slc9a3r1,Rack1,Pafah1b1,Gsk3b,Rhoa,Hsp90ab1,Fscn1
14_Member	GO Biological Processes	GO:0001558	regulation of cell growth	-3.48123	-1.83474	18/446	24333,25416,25595,25716,29271,29431,60465,81732,83427,83527,83572,84027,85333,89816,114612,117273,252892,362587	Eno1,Dpysl2,Map2,Syt1,Cfl1,Pak1,Cttn,Actr3,Rack1,Dbnl,Pafah1b1,Gsk3b,Slc25a4,Picalm,Ddx39b,Rhoa,Lgi1,Macf1
14_Member	GO Biological Processes	GO:0045927	positive regulation of growth	-2.36274	-0.903877	12/309	25716,29271,29431,83527,83572,84027,85333,89816,114612,117273,252892,362587	Syt1,Cfl1,Pak1,Dbnl,Pafah1b1,Gsk3b,Slc25a4,Picalm,Ddx39b,Rhoa,Lgi1,Macf1
15_Summary	GO Biological Processes	GO:0006090	pyruvate metabolic process	-7.93696	-5.28754	12/118	24191,24333,24334,24642,24644,25058,25104,60416,65152,81654,289950,295922,25630,191575,303179,94173,299201,83688,25017,58835,63864,78959,79131,171155,171410,361215,25739,24192,24401,64473,81677,84027,294320,361596	Aldoc,Eno1,Eno2,Pgam1,Pgk1,Hk1,Pc,Pfkp,Pfkm,Dlat,Pdhb,Mtch2,Pkm,Nme1,Guk1,Idh3b,Dlst,Taldo1,Myo5a,Phgdh,Hsd17b10,Akr1a1,Fabp3,Hadhb,Acsbg1,Auh,Pygb,Akr1b1,Got1,Bpnt1,Itpka,Gsk3b,Glo1,Idh2
15_Member	GO Biological Processes	GO:0006090	pyruvate metabolic process	-7.93696	-5.28754	12/118	24191,24333,24334,24642,24644,25058,25104,60416,65152,81654,289950,295922	Aldoc,Eno1,Eno2,Pgam1,Pgk1,Hk1,Pc,Pfkp,Pfkm,Dlat,Pdhb,Mtch2
15_Member	GO Biological Processes	GO:0046939	nucleotide phosphorylation	-6.48758	-4.34669	12/115	24191,24333,24334,24642,24644,25058,25630,60416,65152,191575,295922,303179	Aldoc,Eno1,Eno2,Pgam1,Pgk1,Hk1,Pkm,Pfkp,Pfkm,Nme1,Mtch2,Guk1
15_Member	GO Biological Processes	GO:0006735	NADH regeneration	-6.23491	-4.03764	4/7	24333,24334,60416,65152	Eno1,Eno2,Pfkp,Pfkm
15_Member	GO Biological Processes	GO:0061621	canonical glycolysis	-6.23491	-4.03764	4/7	24333,24334,60416,65152	Eno1,Eno2,Pfkp,Pfkm
15_Member	GO Biological Processes	GO:0061718	glucose catabolic process to pyruvate	-6.23491	-4.03764	4/7	24333,24334,60416,65152	Eno1,Eno2,Pfkp,Pfkm
15_Member	GO Biological Processes	GO:0006165	nucleoside diphosphate phosphorylation	-6.17232	-3.99604	10/112	24191,24333,24334,24642,24644,25058,60416,65152,191575,295922	Aldoc,Eno1,Eno2,Pgam1,Pgk1,Hk1,Pfkp,Pfkm,Nme1,Mtch2
15_Member	GO Biological Processes	GO:0006734	NADH metabolic process	-5.99013	-3.84544	6/30	24333,24334,60416,65152,94173,299201	Eno1,Eno2,Pfkp,Pfkm,Idh3b,Dlst
15_Member	GO Biological Processes	GO:0006096	glycolytic process	-5.94381	-3.81776	9/92	24191,24333,24334,24642,24644,25058,60416,65152,295922	Aldoc,Eno1,Eno2,Pgam1,Pgk1,Hk1,Pfkp,Pfkm,Mtch2
15_Member	GO Biological Processes	GO:0006757	ATP generation from ADP	-5.90391	-3.78868	9/93	24191,24333,24334,24642,24644,25058,60416,65152,295922	Aldoc,Eno1,Eno2,Pgam1,Pgk1,Hk1,Pfkp,Pfkm,Mtch2
15_Member	GO Biological Processes	GO:0009135	purine nucleoside diphosphate metabolic process	-5.84838	-3.79292	11/109	24191,24333,24334,24642,24644,25058,25630,60416,65152,295922,303179	Aldoc,Eno1,Eno2,Pgam1,Pgk1,Hk1,Pkm,Pfkp,Pfkm,Mtch2,Guk1
15_Member	GO Biological Processes	GO:0009179	purine ribonucleoside diphosphate metabolic process	-5.84838	-3.79292	11/109	24191,24333,24334,24642,24644,25058,25630,60416,65152,295922,303179	Aldoc,Eno1,Eno2,Pgam1,Pgk1,Hk1,Pkm,Pfkp,Pfkm,Mtch2,Guk1
15_Member	GO Biological Processes	GO:0009132	nucleoside diphosphate metabolic process	-5.83978	-3.78741	12/132	24191,24333,24334,24642,24644,25058,25630,60416,65152,191575,295922,303179	Aldoc,Eno1,Eno2,Pgam1,Pgk1,Hk1,Pkm,Pfkp,Pfkm,Nme1,Mtch2,Guk1
15_Member	GO Biological Processes	GO:0061620	glycolytic process through glucose-6-phosphate	-5.68648	-3.61199	4/9	24333,24334,60416,65152	Eno1,Eno2,Pfkp,Pfkm
15_Member	GO Biological Processes	GO:0009185	ribonucleoside diphosphate metabolic process	-5.6546	-3.64891	11/114	24191,24333,24334,24642,24644,25058,25630,60416,65152,295922,303179	Aldoc,Eno1,Eno2,Pgam1,Pgk1,Hk1,Pkm,Pfkp,Pfkm,Mtch2,Guk1
15_Member	GO Biological Processes	GO:0046031	ADP metabolic process	-5.56584	-3.51654	9/102	24191,24333,24334,24642,24644,25058,60416,65152,295922	Aldoc,Eno1,Eno2,Pgam1,Pgk1,Hk1,Pfkp,Pfkm,Mtch2
15_Member	GO Biological Processes	GO:0061615	glycolytic process through fructose-6-phosphate	-5.46857	-3.43133	4/10	24333,24334,60416,65152	Eno1,Eno2,Pfkp,Pfkm
15_Member	GO Biological Processes	GO:0006002	fructose 6-phosphate metabolic process	-4.94828	-3.02772	4/13	25058,60416,65152,83688	Hk1,Pfkp,Pfkm,Taldo1
15_Member	GO Biological Processes	GO:0006007	glucose catabolic process	-4.5543	-2.70829	4/16	24333,24334,60416,65152	Eno1,Eno2,Pfkp,Pfkm
15_Member	GO Biological Processes	GO:0032787	monocarboxylic acid metabolic process	-4.46288	-2.63969	20/621	24191,24333,24334,24642,24644,25017,25058,25104,58835,60416,63864,65152,78959,79131,81654,171155,171410,289950,295922,361215	Aldoc,Eno1,Eno2,Pgam1,Pgk1,Myo5a,Hk1,Pc,Phgdh,Pfkp,Hsd17b10,Pfkm,Akr1a1,Fabp3,Dlat,Hadhb,Acsbg1,Pdhb,Mtch2,Auh
15_Member	GO Biological Processes	GO:0016052	carbohydrate catabolic process	-4.43181	-2.61762	11/153	24191,24333,24334,24642,24644,25058,25630,25739,60416,65152,295922	Aldoc,Eno1,Eno2,Pgam1,Pgk1,Hk1,Pkm,Pygb,Pfkp,Pfkm,Mtch2
15_Member	GO Biological Processes	GO:0005975	carbohydrate metabolic process	-4.09727	-2.35507	23/588	24191,24192,24333,24334,24401,24642,24644,25058,25104,25630,25739,60416,64473,65152,78959,81654,81677,83688,84027,289950,294320,295922,361596	Aldoc,Akr1b1,Eno1,Eno2,Got1,Pgam1,Pgk1,Hk1,Pc,Pkm,Pygb,Pfkp,Bpnt1,Pfkm,Akr1a1,Dlat,Itpka,Taldo1,Gsk3b,Pdhb,Glo1,Mtch2,Idh2
15_Member	GO Biological Processes	GO:0019320	hexose catabolic process	-4.05692	-2.32516	4/21	24333,24334,60416,65152	Eno1,Eno2,Pfkp,Pfkm
15_Member	GO Biological Processes	GO:0019674	NAD metabolic process	-3.97369	-2.26765	4/22	24333,24334,60416,65152	Eno1,Eno2,Pfkp,Pfkm
15_Member	GO Biological Processes	GO:0046365	monosaccharide catabolic process	-3.74756	-2.09864	4/25	24333,24334,60416,65152	Eno1,Eno2,Pfkp,Pfkm
15_Member	GO Biological Processes	GO:0030388	fructose 1,6-bisphosphate metabolic process	-3.63434	-2.0152	3/11	24191,60416,65152	Aldoc,Pfkp,Pfkm
16_Summary	GO Biological Processes	GO:0051640	organelle localization	-7.72915	-5.46207	29/548	24242,24923,24949,25017,25400,25416,25558,25578,25595,25716,29271,29448,29489,29693,59114,60374,79434,81732,83572,89816,116561,116657,116728,117028,117273,117280,140694,171116,299850	Calm1,Stx1b,Syn1,Myo5a,Camk2a,Dpysl2,Stxbp1,Ywhaz,Map2,Syt1,Cfl1,Rab7a,Dync1h1,Atp2a2,Slc9a3r1,Lmna,Rab11b,Actr3,Pafah1b1,Picalm,Cltb,Cplx2,Septin5,Bin1,Rhoa,Hnrnpu,Dnm1,Opa1,Dctn2
16_Member	GO Biological Processes	GO:0051640	organelle localization	-7.72915	-5.46207	29/548	24242,24923,24949,25017,25400,25416,25558,25578,25595,25716,29271,29448,29489,29693,59114,60374,79434,81732,83572,89816,116561,116657,116728,117028,117273,117280,140694,171116,299850	Calm1,Stx1b,Syn1,Myo5a,Camk2a,Dpysl2,Stxbp1,Ywhaz,Map2,Syt1,Cfl1,Rab7a,Dync1h1,Atp2a2,Slc9a3r1,Lmna,Rab11b,Actr3,Pafah1b1,Picalm,Cltb,Cplx2,Septin5,Bin1,Rhoa,Hnrnpu,Dnm1,Opa1,Dctn2
16_Member	GO Biological Processes	GO:0051648	vesicle localization	-5.32004	-3.31158	11/171	24949,25017,25416,25595,29448,29489,79434,83572,116561,140694,299850	Syn1,Myo5a,Dpysl2,Map2,Rab7a,Dync1h1,Rab11b,Pafah1b1,Cltb,Dnm1,Dctn2
16_Member	GO Biological Processes	GO:0051650	establishment of vesicle localization	-4.97084	-3.03877	10/152	25017,25416,25595,29448,29489,79434,83572,116561,140694,299850	Myo5a,Dpysl2,Map2,Rab7a,Dync1h1,Rab11b,Pafah1b1,Cltb,Dnm1,Dctn2
16_Member	GO Biological Processes	GO:0051656	establishment of organelle localization	-4.02252	-2.2878	18/403	25017,25416,25558,25578,25595,29271,29448,29489,59114,79434,81732,83572,89816,116561,116657,117280,140694,299850	Myo5a,Dpysl2,Stxbp1,Ywhaz,Map2,Cfl1,Rab7a,Dync1h1,Slc9a3r1,Rab11b,Actr3,Pafah1b1,Picalm,Cltb,Cplx2,Hnrnpu,Dnm1,Dctn2
16_Member	GO Biological Processes	GO:0097479	synaptic vesicle localization	-3.40841	-1.77736	6/60	24949,25416,25595,89816,116561,140694	Syn1,Dpysl2,Map2,Picalm,Cltb,Dnm1
16_Member	GO Biological Processes	GO:0048489	synaptic vesicle transport	-3.04332	-1.47318	5/47	25416,25595,89816,116561,140694	Dpysl2,Map2,Picalm,Cltb,Dnm1
17_Summary	GO Biological Processes	GO:0021762	substantia nigra development	-7.4813	-5.23395	9/45	24242,24264,25576,25577,25617,29753,58945,94271,117273,363875,497902	Calm1,Ckb,Ywhah,Ywhaq,Hspa5,Ywhae,Dynll1,Atp5pf,Rhoa,Rac1,Uqcrq
17_Member	GO Biological Processes	GO:0021762	substantia nigra development	-7.4813	-5.23395	9/45	24242,24264,25576,25577,25617,29753,58945,94271,117273	Calm1,Ckb,Ywhah,Ywhaq,Hspa5,Ywhae,Dynll1,Atp5pf,Rhoa
17_Member	GO Biological Processes	GO:0030901	midbrain development	-6.31534	-4.19293	11/98	24242,24264,25576,25577,25617,29753,58945,94271,117273,363875,497902	Calm1,Ckb,Ywhah,Ywhaq,Hspa5,Ywhae,Dynll1,Atp5pf,Rhoa,Rac1,Uqcrq
17_Member	GO Biological Processes	GO:0048857	neural nucleus development	-5.71502	-3.68952	9/71	24242,24264,25576,25577,25617,29753,58945,94271,117273	Calm1,Ckb,Ywhah,Ywhaq,Hspa5,Ywhae,Dynll1,Atp5pf,Rhoa
18_Summary	GO Biological Processes	GO:0006099	tricarboxylic acid cycle	-6.80674	-4.43766	5/30	79250,81654,289950,298596,299201,24644,25630,60416,65152	Aco2,Dlat,Pdhb,Sdhb,Dlst,Pgk1,Pkm,Pfkp,Pfkm
18_Member	GO Biological Processes	GO:0006099	tricarboxylic acid cycle	-6.80674	-4.43766	5/30	79250,81654,289950,298596,299201	Aco2,Dlat,Pdhb,Sdhb,Dlst
18_Member	GO Biological Processes	GO:0006006	glucose metabolic process	-3.50246	-1.9313	6/217	24644,25630,60416,65152,81654,289950	Pgk1,Pkm,Pfkp,Pfkm,Dlat,Pdhb
18_Member	GO Biological Processes	GO:0006084	acetyl-CoA metabolic process	-3.2916	-1.7776	3/37	81654,289950,299201	Dlat,Pdhb,Dlst
18_Member	GO Biological Processes	GO:0019318	hexose metabolic process	-3.2139	-1.71355	6/246	24644,25630,60416,65152,81654,289950	Pgk1,Pkm,Pfkp,Pfkm,Dlat,Pdhb
18_Member	GO Biological Processes	GO:0005996	monosaccharide metabolic process	-3.04553	-1.59752	6/265	24644,25630,60416,65152,81654,289950	Pgk1,Pkm,Pfkp,Pfkm,Dlat,Pdhb
18_Member	GO Biological Processes	GO:0006637	acyl-CoA metabolic process	-2.19507	-0.982145	3/89	81654,289950,299201	Dlat,Pdhb,Dlst
18_Member	GO Biological Processes	GO:0035383	thioester metabolic process	-2.19507	-0.982145	3/89	81654,289950,299201	Dlat,Pdhb,Dlst
19_Summary	GO Biological Processes	GO:0070201	regulation of establishment of protein localization	-6.61229	-4.45602	29/618	24672,24674,24686,24818,24957,25012,25518,29177,29374,29431,29753,50558,58945,60334,65152,81022,81732,83427,83629,84027,89816,171026,288305,301252,361069,361596,361967,363875,690163,24242,24804,24923,25017,25400,25416,25558,25716,29448,29693,81664,81757,94271,116657,116728,59114,25524,79434,83572,64529,117273,171116,191575,266777,25058,24401	Ppp2ca,Ppp3ca,Prnp,Tcp1,Glul,Snap25,Ppia,Hpca,Cct4,Pak1,Ywhae,Npepps,Dynll1,Ensa,Pfkm,Stxbp5,Actr3,Rack1,Slc12a2,Gsk3b,Picalm,Akap5,Cct8,Hsp90ab1,Dmtn,Idh2,Ppid,Rac1,Oxct1,Calm1,Syp,Stx1b,Myo5a,Camk2a,Dpysl2,Stxbp1,Syt1,Rab7a,Atp2a2,Gnai2,Rala,Atp5pf,Cplx2,Septin5,Slc9a3r1,Psap,Rab11b,Pafah1b1,Ctsb,Rhoa,Opa1,Nme1,Nptx1,Hk1,Got1
19_Member	GO Biological Processes	GO:0070201	regulation of establishment of protein localization	-6.61229	-4.45602	29/618	24672,24674,24686,24818,24957,25012,25518,29177,29374,29431,29753,50558,58945,60334,65152,81022,81732,83427,83629,84027,89816,171026,288305,301252,361069,361596,361967,363875,690163	Ppp2ca,Ppp3ca,Prnp,Tcp1,Glul,Snap25,Ppia,Hpca,Cct4,Pak1,Ywhae,Npepps,Dynll1,Ensa,Pfkm,Stxbp5,Actr3,Rack1,Slc12a2,Gsk3b,Picalm,Akap5,Cct8,Hsp90ab1,Dmtn,Idh2,Ppid,Rac1,Oxct1
19_Member	GO Biological Processes	GO:1904951	positive regulation of establishment of protein localization	-6.2183	-4.11362	21/370	24686,24818,24957,25012,25518,29177,29374,29431,29753,50558,58945,65152,81732,83427,84027,171026,288305,301252,361967,363875,690163	Prnp,Tcp1,Glul,Snap25,Ppia,Hpca,Cct4,Pak1,Ywhae,Npepps,Dynll1,Pfkm,Actr3,Rack1,Gsk3b,Akap5,Cct8,Hsp90ab1,Ppid,Rac1,Oxct1
19_Member	GO Biological Processes	GO:0051223	regulation of protein transport	-5.46065	-3.48951	26/591	24672,24674,24686,24957,25012,25518,29177,29431,29753,50558,58945,60334,65152,81022,81732,83427,83629,84027,89816,171026,301252,361069,361596,361967,363875,690163	Ppp2ca,Ppp3ca,Prnp,Glul,Snap25,Ppia,Hpca,Pak1,Ywhae,Npepps,Dynll1,Ensa,Pfkm,Stxbp5,Actr3,Rack1,Slc12a2,Gsk3b,Picalm,Akap5,Hsp90ab1,Dmtn,Idh2,Ppid,Rac1,Oxct1
19_Member	GO Biological Processes	GO:1903530	regulation of secretion by cell	-5.38719	-3.43165	29/711	24242,24674,24804,24923,24957,25012,25017,25400,25416,25518,25558,25716,29448,29693,58945,60334,65152,81022,81664,81757,83629,84027,94271,116657,116728,361596,361967,363875,690163	Calm1,Ppp3ca,Syp,Stx1b,Glul,Snap25,Myo5a,Camk2a,Dpysl2,Ppia,Stxbp1,Syt1,Rab7a,Atp2a2,Dynll1,Ensa,Pfkm,Stxbp5,Gnai2,Rala,Slc12a2,Gsk3b,Atp5pf,Cplx2,Septin5,Idh2,Ppid,Rac1,Oxct1
19_Member	GO Biological Processes	GO:0051046	regulation of secretion	-4.92678	-3.04116	30/792	24242,24674,24804,24923,24957,25012,25017,25400,25416,25518,25558,25716,29448,29693,58945,59114,60334,65152,81022,81664,81757,83629,84027,94271,116657,116728,361596,361967,363875,690163	Calm1,Ppp3ca,Syp,Stx1b,Glul,Snap25,Myo5a,Camk2a,Dpysl2,Ppia,Stxbp1,Syt1,Rab7a,Atp2a2,Dynll1,Slc9a3r1,Ensa,Pfkm,Stxbp5,Gnai2,Rala,Slc12a2,Gsk3b,Atp5pf,Cplx2,Septin5,Idh2,Ppid,Rac1,Oxct1
19_Member	GO Biological Processes	GO:0051222	positive regulation of protein transport	-4.75428	-2.88915	18/354	24686,24957,25012,25518,29177,29431,29753,50558,58945,65152,81732,83427,84027,171026,301252,361967,363875,690163	Prnp,Glul,Snap25,Ppia,Hpca,Pak1,Ywhae,Npepps,Dynll1,Pfkm,Actr3,Rack1,Gsk3b,Akap5,Hsp90ab1,Ppid,Rac1,Oxct1
19_Member	GO Biological Processes	GO:0009306	protein secretion	-4.50345	-2.67661	19/405	24674,24957,25012,25017,25518,25524,58945,60334,65152,79434,81022,83572,83629,171026,361069,361596,361967,363875,690163	Ppp3ca,Glul,Snap25,Myo5a,Ppia,Psap,Dynll1,Ensa,Pfkm,Rab11b,Stxbp5,Pafah1b1,Slc12a2,Akap5,Dmtn,Idh2,Ppid,Rac1,Oxct1
19_Member	GO Biological Processes	GO:0035592	establishment of protein localization to extracellular region	-4.47435	-2.64933	19/407	24674,24957,25012,25017,25518,25524,58945,60334,65152,79434,81022,83572,83629,171026,361069,361596,361967,363875,690163	Ppp3ca,Glul,Snap25,Myo5a,Ppia,Psap,Dynll1,Ensa,Pfkm,Rab11b,Stxbp5,Pafah1b1,Slc12a2,Akap5,Dmtn,Idh2,Ppid,Rac1,Oxct1
19_Member	GO Biological Processes	GO:0071692	protein localization to extracellular region	-4.3741	-2.57478	19/414	24674,24957,25012,25017,25518,25524,58945,60334,65152,79434,81022,83572,83629,171026,361069,361596,361967,363875,690163	Ppp3ca,Glul,Snap25,Myo5a,Ppia,Psap,Dynll1,Ensa,Pfkm,Rab11b,Stxbp5,Pafah1b1,Slc12a2,Akap5,Dmtn,Idh2,Ppid,Rac1,Oxct1
19_Member	GO Biological Processes	GO:0009749	response to glucose	-3.39438	-1.76567	14/303	24672,24674,24957,58945,60334,64529,79434,83427,117273,171116,191575,266777,363875,690163	Ppp2ca,Ppp3ca,Glul,Dynll1,Ensa,Ctsb,Rab11b,Rack1,Rhoa,Opa1,Nme1,Nptx1,Rac1,Oxct1
19_Member	GO Biological Processes	GO:0051047	positive regulation of secretion	-3.38061	-1.83798	14/424	24923,24957,25012,25416,25518,25716,29448,58945,65152,81022,81664,116728,363875,690163	Stx1b,Glul,Snap25,Dpysl2,Ppia,Syt1,Rab7a,Dynll1,Pfkm,Stxbp5,Gnai2,Septin5,Rac1,Oxct1
19_Member	GO Biological Processes	GO:0001678	cellular glucose homeostasis	-3.36766	-1.74126	12/235	24672,24674,25058,58945,65152,79434,83427,171116,191575,266777,363875,690163	Ppp2ca,Ppp3ca,Hk1,Dynll1,Pfkm,Rab11b,Rack1,Opa1,Nme1,Nptx1,Rac1,Oxct1
19_Member	GO Biological Processes	GO:0009746	response to hexose	-3.22712	-1.62103	14/315	24672,24674,24957,58945,60334,64529,79434,83427,117273,171116,191575,266777,363875,690163	Ppp2ca,Ppp3ca,Glul,Dynll1,Ensa,Ctsb,Rab11b,Rack1,Rhoa,Opa1,Nme1,Nptx1,Rac1,Oxct1
19_Member	GO Biological Processes	GO:0032024	positive regulation of insulin secretion	-3.07013	-1.61596	6/96	24957,25012,58945,65152,363875,690163	Glul,Snap25,Dynll1,Pfkm,Rac1,Oxct1
19_Member	GO Biological Processes	GO:0009743	response to carbohydrate	-3.03268	-1.46456	15/368	24401,24672,24674,24957,58945,60334,64529,79434,83427,117273,171116,191575,266777,363875,690163	Got1,Ppp2ca,Ppp3ca,Glul,Dynll1,Ensa,Ctsb,Rab11b,Rack1,Rhoa,Opa1,Nme1,Nptx1,Rac1,Oxct1
19_Member	GO Biological Processes	GO:0034284	response to monosaccharide	-3.03084	-1.46373	14/330	24672,24674,24957,58945,60334,64529,79434,83427,117273,171116,191575,266777,363875,690163	Ppp2ca,Ppp3ca,Glul,Dynll1,Ensa,Ctsb,Rab11b,Rack1,Rhoa,Opa1,Nme1,Nptx1,Rac1,Oxct1
19_Member	GO Biological Processes	GO:0030073	insulin secretion	-2.70797	-1.35334	9/241	24957,25012,25017,58945,60334,65152,79434,363875,690163	Glul,Snap25,Myo5a,Dynll1,Ensa,Pfkm,Rab11b,Rac1,Oxct1
19_Member	GO Biological Processes	GO:0050714	positive regulation of protein secretion	-2.48691	-1.18787	7/167	24957,25012,25518,58945,65152,363875,690163	Glul,Snap25,Ppia,Dynll1,Pfkm,Rac1,Oxct1
19_Member	GO Biological Processes	GO:0042886	amide transport	-2.43302	-1.15103	11/368	24957,25012,25017,25524,58945,59114,60334,65152,79434,363875,690163	Glul,Snap25,Myo5a,Psap,Dynll1,Slc9a3r1,Ensa,Pfkm,Rab11b,Rac1,Oxct1
19_Member	GO Biological Processes	GO:0090277	positive regulation of peptide hormone secretion	-2.35295	-1.09287	6/133	24957,25012,58945,65152,363875,690163	Glul,Snap25,Dynll1,Pfkm,Rac1,Oxct1
19_Member	GO Biological Processes	GO:0002793	positive regulation of peptide secretion	-2.29061	-1.05469	6/137	24957,25012,58945,65152,363875,690163	Glul,Snap25,Dynll1,Pfkm,Rac1,Oxct1
19_Member	GO Biological Processes	GO:0015833	peptide transport	-2.27938	-1.04581	10/332	24957,25012,25017,58945,59114,60334,65152,79434,363875,690163	Glul,Snap25,Myo5a,Dynll1,Slc9a3r1,Ensa,Pfkm,Rab11b,Rac1,Oxct1
19_Member	GO Biological Processes	GO:0030072	peptide hormone secretion	-2.06241	-0.879103	9/303	24957,25012,25017,58945,60334,65152,79434,363875,690163	Glul,Snap25,Myo5a,Dynll1,Ensa,Pfkm,Rab11b,Rac1,Oxct1
19_Member	GO Biological Processes	GO:0050796	regulation of insulin secretion	-2.05509	-0.875514	7/201	24957,25012,58945,60334,65152,363875,690163	Glul,Snap25,Dynll1,Ensa,Pfkm,Rac1,Oxct1
20_Summary	GO Biological Processes	GO:0072594	establishment of protein localization to organelle	-6.27233	-4.16217	23/432	24242,24468,24672,24674,24818,25058,25578,25617,29271,29374,29448,50558,60374,81757,114766,171026,171139,252928,288305,295922,301252,312890,362587	Calm1,Hspa8,Ppp2ca,Ppp3ca,Tcp1,Hk1,Ywhaz,Hspa5,Cfl1,Cct4,Rab7a,Npepps,Lmna,Rala,Phb2,Akap5,Timm9,Timm13,Cct8,Mtch2,Hsp90ab1,Gdap1,Macf1
20_Member	GO Biological Processes	GO:0072594	establishment of protein localization to organelle	-6.27233	-4.16217	23/432	24242,24468,24672,24674,24818,25058,25578,25617,29271,29374,29448,50558,60374,81757,114766,171026,171139,252928,288305,295922,301252,312890,362587	Calm1,Hspa8,Ppp2ca,Ppp3ca,Tcp1,Hk1,Ywhaz,Hspa5,Cfl1,Cct4,Rab7a,Npepps,Lmna,Rala,Phb2,Akap5,Timm9,Timm13,Cct8,Mtch2,Hsp90ab1,Gdap1,Macf1
20_Member	GO Biological Processes	GO:0072655	establishment of protein localization to mitochondrion	-3.80969	-2.11731	9/122	24242,25058,25578,50558,81757,171139,252928,295922,312890	Calm1,Hk1,Ywhaz,Npepps,Rala,Timm9,Timm13,Mtch2,Gdap1
20_Member	GO Biological Processes	GO:0070585	protein localization to mitochondrion	-3.65195	-1.98439	9/128	24242,25058,25578,50558,81757,171139,252928,295922,312890	Calm1,Hk1,Ywhaz,Npepps,Rala,Timm9,Timm13,Mtch2,Gdap1
20_Member	GO Biological Processes	GO:0090151	establishment of protein localization to mitochondrial membrane	-3.55017	-1.9603	4/28	24242,171139,252928,295922	Calm1,Timm9,Timm13,Mtch2
Analysis type: Gene Ontology: Cellular Component (GO:CC) - Metascape
GroupID	Category	Term	Description	LogP	Log(q-value)	InTerm_InList	Genes	Symbols
1_Summary	GO Cellular Components	GO:0150034	distal axon	-22.4011	-19.1707	38/440	24213,24242,24333,24334,24468,24672,24686,24804,24949,24957,25012,25415,25416,25531,25595,25716,29219,29271,29431,29448,29542,29704,29753,79130,83612,116563,116657,116728,117028,117277,117556,140673,288669,299850,306439,361651,684352,691335,29144,29211,56064,64303,66031,83529,83531,83532,84008,84379,89816,116561,116638,140694,360882,499903,79117,81664,83427,266777,24818,58945,64202,29693,83527,14…	Atp1a3,Calm1,Eno1,Eno2,Hspa8,Ppp2ca,Prnp,Syp,Syn1,Glul,Snap25,Crmp1,Dpysl2,Rab3a,Map2,Syt1,Snca,Cfl1,Pak1,Rab7a,Pebp1,Pacsin1,Ywhae,Dnajc5,Slc32a1,Ap2m1,Cplx2,Septin5,Bin1,Epn1,Sv2b,Napa,Arpc3,Dctn2,Gpm6a,Prrt2,Twf2,Septin6,Canx,Sptbn2,Nptn,Pfn1,Wdr7,Vdac1,Vdac2,Vdac3,Cntnap1,Rab6a,Picalm,Cltb,Slc17a7,Dnm1,Cadm3,Napb,Arf5,Gnai2,Rack1,Nptx1,Tcp1,Dynll1,Calr,Atp2a2,Dbnl,Ap2b1,Coro1c,Sfxn3,Slc25a4,S…
1_Member	GO Cellular Components	GO:0150034	distal axon	-22.4011	-19.1707	38/440	24213,24242,24333,24334,24468,24672,24686,24804,24949,24957,25012,25415,25416,25531,25595,25716,29219,29271,29431,29448,29542,29704,29753,79130,83612,116563,116657,116728,117028,117277,117556,140673,288669,299850,306439,361651,684352,691335	Atp1a3,Calm1,Eno1,Eno2,Hspa8,Ppp2ca,Prnp,Syp,Syn1,Glul,Snap25,Crmp1,Dpysl2,Rab3a,Map2,Syt1,Snca,Cfl1,Pak1,Rab7a,Pebp1,Pacsin1,Ywhae,Dnajc5,Slc32a1,Ap2m1,Cplx2,Septin5,Bin1,Epn1,Sv2b,Napa,Arpc3,Dctn2,Gpm6a,Prrt2,Twf2,Septin6
1_Member	GO Cellular Components	GO:0098793	presynapse	-22.1592	-19.1707	45/669	24213,24242,24468,24672,24686,24804,24949,24957,25012,25416,25531,25716,29144,29211,29219,29431,29448,29542,29704,56064,64303,66031,79130,83529,83531,83532,83612,84008,84379,89816,116561,116563,116638,116657,116728,117028,117277,117556,140673,140694,306439,360882,361651,499903,691335	Atp1a3,Calm1,Hspa8,Ppp2ca,Prnp,Syp,Syn1,Glul,Snap25,Dpysl2,Rab3a,Syt1,Canx,Sptbn2,Snca,Pak1,Rab7a,Pebp1,Pacsin1,Nptn,Pfn1,Wdr7,Dnajc5,Vdac1,Vdac2,Vdac3,Slc32a1,Cntnap1,Rab6a,Picalm,Cltb,Ap2m1,Slc17a7,Cplx2,Septin5,Bin1,Epn1,Sv2b,Napa,Dnm1,Gpm6a,Cadm3,Prrt2,Napb,Septin6
1_Member	GO Cellular Components	GO:0070382	exocytic vesicle	-19.5298	-16.9392	30/298	24242,24468,24804,24949,25012,25531,25716,29211,29219,29448,29542,66031,79117,79130,81664,83427,83529,83531,83532,83612,84379,89816,116561,116638,116728,117028,117556,140694,361651,691335	Calm1,Hspa8,Syp,Syn1,Snap25,Rab3a,Syt1,Sptbn2,Snca,Rab7a,Pebp1,Wdr7,Arf5,Dnajc5,Gnai2,Rack1,Vdac1,Vdac2,Vdac3,Slc32a1,Rab6a,Picalm,Cltb,Slc17a7,Septin5,Bin1,Sv2b,Dnm1,Prrt2,Septin6
1_Member	GO Cellular Components	GO:0043679	axon terminus	-18.2011	-15.7566	26/230	24213,24468,24672,24686,24804,24949,24957,25012,25416,25531,25716,29219,29448,29542,29704,79130,83612,116563,116657,116728,117028,117277,117556,140673,361651,691335	Atp1a3,Hspa8,Ppp2ca,Prnp,Syp,Syn1,Glul,Snap25,Dpysl2,Rab3a,Syt1,Snca,Rab7a,Pebp1,Pacsin1,Dnajc5,Slc32a1,Ap2m1,Cplx2,Septin5,Bin1,Epn1,Sv2b,Napa,Prrt2,Septin6
1_Member	GO Cellular Components	GO:0044306	neuron projection terminus	-17.1164	-14.8682	26/254	24213,24468,24672,24686,24804,24949,24957,25012,25416,25531,25716,29219,29448,29542,29704,79130,83612,116563,116657,116728,117028,117277,117556,140673,361651,691335	Atp1a3,Hspa8,Ppp2ca,Prnp,Syp,Syn1,Glul,Snap25,Dpysl2,Rab3a,Syt1,Snca,Rab7a,Pebp1,Pacsin1,Dnajc5,Slc32a1,Ap2m1,Cplx2,Septin5,Bin1,Epn1,Sv2b,Napa,Prrt2,Septin6
1_Member	GO Cellular Components	GO:0008021	synaptic vesicle	-17.0314	-14.821	26/256	24242,24468,24804,24949,25012,25531,25716,29211,29219,29448,29542,66031,79130,83529,83531,83532,83612,89816,116561,116638,116728,117028,117556,140694,361651,691335	Calm1,Hspa8,Syp,Syn1,Snap25,Rab3a,Syt1,Sptbn2,Snca,Rab7a,Pebp1,Wdr7,Dnajc5,Vdac1,Vdac2,Vdac3,Slc32a1,Picalm,Cltb,Slc17a7,Septin5,Bin1,Sv2b,Dnm1,Prrt2,Septin6
1_Member	GO Cellular Components	GO:0030133	transport vesicle	-16.5372	-14.3616	31/411	24242,24468,24804,24949,25012,25531,25716,29211,29219,29448,29542,66031,79117,79130,81664,83427,83529,83531,83532,83612,84379,89816,116561,116638,116728,117028,117556,140694,266777,361651,691335	Calm1,Hspa8,Syp,Syn1,Snap25,Rab3a,Syt1,Sptbn2,Snca,Rab7a,Pebp1,Wdr7,Arf5,Dnajc5,Gnai2,Rack1,Vdac1,Vdac2,Vdac3,Slc32a1,Rab6a,Picalm,Cltb,Slc17a7,Septin5,Bin1,Sv2b,Dnm1,Nptx1,Prrt2,Septin6
1_Member	GO Cellular Components	GO:0043195	terminal bouton	-15.5501	-13.4366	19/129	24468,24672,24686,24804,24949,25012,25416,25531,25716,29219,29448,29704,79130,116563,116657,116728,117277,117556,140673	Hspa8,Ppp2ca,Prnp,Syp,Syn1,Snap25,Dpysl2,Rab3a,Syt1,Snca,Rab7a,Pacsin1,Dnajc5,Ap2m1,Cplx2,Septin5,Epn1,Sv2b,Napa
1_Member	GO Cellular Components	GO:0099503	secretory vesicle	-12.5955	-10.5363	33/651	24242,24468,24804,24818,24949,25012,25531,25716,29211,29219,29448,29542,58945,64202,66031,79117,79130,81664,83427,83529,83531,83532,83612,84379,89816,116561,116638,116728,117028,117556,140694,361651,691335	Calm1,Hspa8,Syp,Tcp1,Syn1,Snap25,Rab3a,Syt1,Sptbn2,Snca,Rab7a,Pebp1,Dynll1,Calr,Wdr7,Arf5,Dnajc5,Gnai2,Rack1,Vdac1,Vdac2,Vdac3,Slc32a1,Rab6a,Picalm,Cltb,Slc17a7,Septin5,Bin1,Sv2b,Dnm1,Prrt2,Septin6
1_Member	GO Cellular Components	GO:0030672	synaptic vesicle membrane	-9.48141	-7.55355	14/135	24242,24804,24949,25531,25716,29219,29448,79130,83612,116561,116638,117028,117556,361651	Calm1,Syp,Syn1,Rab3a,Syt1,Snca,Rab7a,Dnajc5,Slc32a1,Cltb,Slc17a7,Bin1,Sv2b,Prrt2
1_Member	GO Cellular Components	GO:0099501	exocytic vesicle membrane	-9.48141	-7.55355	14/135	24242,24804,24949,25531,25716,29219,29448,79130,83612,116561,116638,117028,117556,361651	Calm1,Syp,Syn1,Rab3a,Syt1,Snca,Rab7a,Dnajc5,Slc32a1,Cltb,Slc17a7,Bin1,Sv2b,Prrt2
1_Member	GO Cellular Components	GO:0030658	transport vesicle membrane	-7.48816	-5.69857	14/192	24242,24804,24949,25531,25716,29219,29448,79130,83612,116561,116638,117028,117556,361651	Calm1,Syp,Syn1,Rab3a,Syt1,Snca,Rab7a,Dnajc5,Slc32a1,Cltb,Slc17a7,Bin1,Sv2b,Prrt2
1_Member	GO Cellular Components	GO:0098563	intrinsic component of synaptic vesicle membrane	-7.21502	-5.50522	9/68	24804,24949,25531,25716,29448,79130,83612,116638,117556	Syp,Syn1,Rab3a,Syt1,Rab7a,Dnajc5,Slc32a1,Slc17a7,Sv2b
1_Member	GO Cellular Components	GO:0012506	vesicle membrane	-3.88878	-2.59042	21/765	24242,24804,24949,25531,25716,29219,29448,29693,29704,79130,83527,83612,116561,116563,116638,117028,117277,117556,140670,361651,501841	Calm1,Syp,Syn1,Rab3a,Syt1,Snca,Rab7a,Atp2a2,Pacsin1,Dnajc5,Dbnl,Slc32a1,Cltb,Ap2m1,Slc17a7,Bin1,Epn1,Sv2b,Ap2b1,Prrt2,Coro1c
1_Member	GO Cellular Components	GO:0031300	intrinsic component of organelle membrane	-3.73573	-2.45689	14/405	24804,24949,25531,25716,29448,64202,65042,79130,83612,85333,116638,117556,245959,296966	Syp,Syn1,Rab3a,Syt1,Rab7a,Calr,Sfxn3,Dnajc5,Slc32a1,Slc25a4,Slc17a7,Sv2b,Slc25a3,Chchd3
1_Member	GO Cellular Components	GO:0030285	integral component of synaptic vesicle membrane	-3.72529	-2.45689	5/48	24804,25716,83612,116638,117556	Syp,Syt1,Slc32a1,Slc17a7,Sv2b
1_Member	GO Cellular Components	GO:0030659	cytoplasmic vesicle membrane	-3.64472	-2.38451	20/739	24242,24804,24949,25531,25716,29219,29448,29704,79130,83527,83612,116561,116563,116638,117028,117277,117556,140670,361651,501841	Calm1,Syp,Syn1,Rab3a,Syt1,Snca,Rab7a,Pacsin1,Dnajc5,Dbnl,Slc32a1,Cltb,Ap2m1,Slc17a7,Bin1,Epn1,Sv2b,Ap2b1,Prrt2,Coro1c
1_Member	GO Cellular Components	GO:0031301	integral component of organelle membrane	-2.06339	-0.958491	10/370	24804,25716,64202,65042,83612,85333,116638,117556,245959,296966	Syp,Syt1,Calr,Sfxn3,Slc32a1,Slc25a4,Slc17a7,Sv2b,Slc25a3,Chchd3
2_Summary	GO Cellular Components	GO:0031966	mitochondrial membrane	-21.0633	-18.2508	42/608	24242,24686,25058,25721,29219,29271,29445,29483,29542,29593,65042,65262,83529,83531,83532,85333,94271,116550,140608,171139,191575,192241,245959,252928,288088,294362,294964,295922,296966,297990,298596,298762,299739,300047,300677,301011,301458,309111,315167,497902,685322,690441,63864,81654,94173,289950,299201,363159,24211,24213,25012,25390,25650,29693	Calm1,Prnp,Hk1,Got2,Snca,Cfl1,Cox4i1,Slc1a3,Pebp1,Ckmt1,Sfxn3,Atp5f1a,Vdac1,Vdac2,Vdac3,Slc25a4,Atp5pf,Atp5f1c,Atp5me,Timm9,Nme1,Atp5po,Slc25a3,Timm13,Ndufb4,Cisd1,Ndufb5,Mtch2,Chchd3,Ndufb6,Sdhb,Cox7a2l,Ndufa12,Cyc1,Atp5mg,Uqcrc1,Ndufs1,Slc25a22,Ndufa6,Uqcrq,Uqcr10,Atp5mf,Hsd17b10,Dlat,Idh3b,Pdhb,Dlst,Gpd1l,Atp1a1,Atp1a3,Snap25,Atp1b3,Atp1b1,Atp2a2
2_Member	GO Cellular Components	GO:0031966	mitochondrial membrane	-21.0633	-18.2508	42/608	24242,24686,25058,25721,29219,29271,29445,29483,29542,29593,65042,65262,83529,83531,83532,85333,94271,116550,140608,171139,191575,192241,245959,252928,288088,294362,294964,295922,296966,297990,298596,298762,299739,300047,300677,301011,301458,309111,315167,497902,685322,690441	Calm1,Prnp,Hk1,Got2,Snca,Cfl1,Cox4i1,Slc1a3,Pebp1,Ckmt1,Sfxn3,Atp5f1a,Vdac1,Vdac2,Vdac3,Slc25a4,Atp5pf,Atp5f1c,Atp5me,Timm9,Nme1,Atp5po,Slc25a3,Timm13,Ndufb4,Cisd1,Ndufb5,Mtch2,Chchd3,Ndufb6,Sdhb,Cox7a2l,Ndufa12,Cyc1,Atp5mg,Uqcrc1,Ndufs1,Slc25a22,Ndufa6,Uqcrq,Uqcr10,Atp5mf
2_Member	GO Cellular Components	GO:0005740	mitochondrial envelope	-19.7659	-17.0784	42/658	24242,24686,25058,25721,29219,29271,29445,29483,29542,29593,65042,65262,83529,83531,83532,85333,94271,116550,140608,171139,191575,192241,245959,252928,288088,294362,294964,295922,296966,297990,298596,298762,299739,300047,300677,301011,301458,309111,315167,497902,685322,690441	Calm1,Prnp,Hk1,Got2,Snca,Cfl1,Cox4i1,Slc1a3,Pebp1,Ckmt1,Sfxn3,Atp5f1a,Vdac1,Vdac2,Vdac3,Slc25a4,Atp5pf,Atp5f1c,Atp5me,Timm9,Nme1,Atp5po,Slc25a3,Timm13,Ndufb4,Cisd1,Ndufb5,Mtch2,Chchd3,Ndufb6,Sdhb,Cox7a2l,Ndufa12,Cyc1,Atp5mg,Uqcrc1,Ndufs1,Slc25a22,Ndufa6,Uqcrq,Uqcr10,Atp5mf
2_Member	GO Cellular Components	GO:0098798	mitochondrial protein-containing complex	-18.9656	-16.4542	29/286	29445,63864,65262,81654,83529,85333,94173,94271,116550,140608,171139,192241,252928,288088,289950,294964,296966,297990,298596,298762,299739,300047,300677,301011,301458,315167,497902,685322,690441	Cox4i1,Hsd17b10,Atp5f1a,Dlat,Vdac1,Slc25a4,Idh3b,Atp5pf,Atp5f1c,Atp5me,Timm9,Atp5po,Timm13,Ndufb4,Pdhb,Ndufb5,Chchd3,Ndufb6,Sdhb,Cox7a2l,Ndufa12,Cyc1,Atp5mg,Uqcrc1,Ndufs1,Ndufa6,Uqcrq,Uqcr10,Atp5mf
2_Member	GO Cellular Components	GO:0098800	inner mitochondrial membrane protein complex	-17.7808	-15.4455	22/152	29445,65262,94271,116550,140608,171139,192241,288088,294964,296966,297990,298596,298762,299739,300047,300677,301011,301458,315167,497902,685322,690441	Cox4i1,Atp5f1a,Atp5pf,Atp5f1c,Atp5me,Timm9,Atp5po,Ndufb4,Ndufb5,Chchd3,Ndufb6,Sdhb,Cox7a2l,Ndufa12,Cyc1,Atp5mg,Uqcrc1,Ndufs1,Ndufa6,Uqcrq,Uqcr10,Atp5mf
2_Member	GO Cellular Components	GO:0005743	mitochondrial inner membrane	-17.3146	-15.025	31/386	25721,29219,29445,29483,29593,65042,65262,85333,94271,116550,140608,171139,192241,245959,252928,288088,294964,296966,297990,298596,298762,299739,300047,300677,301011,301458,309111,315167,497902,685322,690441	Got2,Snca,Cox4i1,Slc1a3,Ckmt1,Sfxn3,Atp5f1a,Slc25a4,Atp5pf,Atp5f1c,Atp5me,Timm9,Atp5po,Slc25a3,Timm13,Ndufb4,Ndufb5,Chchd3,Ndufb6,Sdhb,Cox7a2l,Ndufa12,Cyc1,Atp5mg,Uqcrc1,Ndufs1,Slc25a22,Ndufa6,Uqcrq,Uqcr10,Atp5mf
2_Member	GO Cellular Components	GO:0019866	organelle inner membrane	-15.6475	-13.5041	31/442	25721,29219,29445,29483,29593,65042,65262,85333,94271,116550,140608,171139,192241,245959,252928,288088,294964,296966,297990,298596,298762,299739,300047,300677,301011,301458,309111,315167,497902,685322,690441	Got2,Snca,Cox4i1,Slc1a3,Ckmt1,Sfxn3,Atp5f1a,Slc25a4,Atp5pf,Atp5f1c,Atp5me,Timm9,Atp5po,Slc25a3,Timm13,Ndufb4,Ndufb5,Chchd3,Ndufb6,Sdhb,Cox7a2l,Ndufa12,Cyc1,Atp5mg,Uqcrc1,Ndufs1,Slc25a22,Ndufa6,Uqcrq,Uqcr10,Atp5mf
2_Member	GO Cellular Components	GO:1990204	oxidoreductase complex	-12.2999	-10.2656	16/123	81654,94173,288088,289950,294964,297990,298596,299201,299739,300047,301011,301458,315167,363159,497902,685322	Dlat,Idh3b,Ndufb4,Pdhb,Ndufb5,Ndufb6,Sdhb,Dlst,Ndufa12,Cyc1,Uqcrc1,Ndufs1,Ndufa6,Gpd1l,Uqcrq,Uqcr10
2_Member	GO Cellular Components	GO:0098803	respiratory chain complex	-10.6159	-8.60502	13/91	29445,288088,294964,297990,298596,298762,299739,300047,301011,301458,315167,497902,685322	Cox4i1,Ndufb4,Ndufb5,Ndufb6,Sdhb,Cox7a2l,Ndufa12,Cyc1,Uqcrc1,Ndufs1,Ndufa6,Uqcrq,Uqcr10
2_Member	GO Cellular Components	GO:0005746	mitochondrial respirasome	-10.5539	-8.56535	13/92	29445,288088,294964,297990,298596,298762,299739,300047,301011,301458,315167,497902,685322	Cox4i1,Ndufb4,Ndufb5,Ndufb6,Sdhb,Cox7a2l,Ndufa12,Cyc1,Uqcrc1,Ndufs1,Ndufa6,Uqcrq,Uqcr10
2_Member	GO Cellular Components	GO:0070469	respirasome	-10.0846	-8.11722	13/100	29445,288088,294964,297990,298596,298762,299739,300047,301011,301458,315167,497902,685322	Cox4i1,Ndufb4,Ndufb5,Ndufb6,Sdhb,Cox7a2l,Ndufa12,Cyc1,Uqcrc1,Ndufs1,Ndufa6,Uqcrq,Uqcr10
2_Member	GO Cellular Components	GO:1990351	transporter complex	-7.14105	-5.44253	19/388	24211,24213,24242,25012,25390,25650,29693,171139,252928,288088,294964,297990,299739,300047,301011,301458,315167,497902,685322	Atp1a1,Atp1a3,Calm1,Snap25,Atp1b3,Atp1b1,Atp2a2,Timm9,Timm13,Ndufb4,Ndufb5,Ndufb6,Ndufa12,Cyc1,Uqcrc1,Ndufs1,Ndufa6,Uqcrq,Uqcr10
2_Member	GO Cellular Components	GO:1902495	transmembrane transporter complex	-6.10352	-4.5215	17/367	24211,24213,24242,25012,25390,25650,29693,288088,294964,297990,299739,300047,301011,301458,315167,497902,685322	Atp1a1,Atp1a3,Calm1,Snap25,Atp1b3,Atp1b1,Atp2a2,Ndufb4,Ndufb5,Ndufb6,Ndufa12,Cyc1,Uqcrc1,Ndufs1,Ndufa6,Uqcrq,Uqcr10
2_Member	GO Cellular Components	GO:0005747	mitochondrial respiratory chain complex I	-4.63095	-3.24445	6/52	288088,294964,297990,299739,301458,315167	Ndufb4,Ndufb5,Ndufb6,Ndufa12,Ndufs1,Ndufa6
2_Member	GO Cellular Components	GO:0030964	NADH dehydrogenase complex	-4.63095	-3.24445	6/52	288088,294964,297990,299739,301458,315167	Ndufb4,Ndufb5,Ndufb6,Ndufa12,Ndufs1,Ndufa6
2_Member	GO Cellular Components	GO:0045271	respiratory chain complex I	-4.63095	-3.24445	6/52	288088,294964,297990,299739,301458,315167	Ndufb4,Ndufb5,Ndufb6,Ndufa12,Ndufs1,Ndufa6
3_Summary	GO Cellular Components	GO:0098794	postsynapse	-17.7831	-15.4455	43/783	24191,24211,24213,24468,24672,24674,24686,24804,24949,25012,25152,25595,29144,29177,29211,29219,29271,29431,29483,29704,56064,60324,64303,81677,83527,89816,114028,114117,116561,116563,116638,116657,117277,140670,140673,140734,171026,287986,305614,306439,361651,362152,499903,25716	Aldoc,Atp1a1,Atp1a3,Hspa8,Ppp2ca,Ppp3ca,Prnp,Syp,Syn1,Snap25,Map1a,Map2,Canx,Hpca,Sptbn2,Snca,Cfl1,Pak1,Slc1a3,Pacsin1,Nptn,Synpo,Pfn1,Itpka,Dbnl,Picalm,Ctnnd2,Gng3,Cltb,Ap2m1,Slc17a7,Cplx2,Epn1,Ap2b1,Napa,Dynll2,Akap5,Eif4g1,Sptbn1,Gpm6a,Prrt2,Hnrnpa3,Napb,Syt1
3_Member	GO Cellular Components	GO:0098794	postsynapse	-17.7831	-15.4455	43/783	24191,24211,24213,24468,24672,24674,24686,24804,24949,25012,25152,25595,29144,29177,29211,29219,29271,29431,29483,29704,56064,60324,64303,81677,83527,89816,114028,114117,116561,116563,116638,116657,117277,140670,140673,140734,171026,287986,305614,306439,361651,362152,499903	Aldoc,Atp1a1,Atp1a3,Hspa8,Ppp2ca,Ppp3ca,Prnp,Syp,Syn1,Snap25,Map1a,Map2,Canx,Hpca,Sptbn2,Snca,Cfl1,Pak1,Slc1a3,Pacsin1,Nptn,Synpo,Pfn1,Itpka,Dbnl,Picalm,Ctnnd2,Gng3,Cltb,Ap2m1,Slc17a7,Cplx2,Epn1,Ap2b1,Napa,Dynll2,Akap5,Eif4g1,Sptbn1,Gpm6a,Prrt2,Hnrnpa3,Napb
3_Member	GO Cellular Components	GO:0098984	neuron to neuron synapse	-8.71054	-6.83592	23/461	24211,24213,24468,24672,24686,24804,24949,25152,25595,25716,29431,29704,56064,60324,83527,89816,114028,114117,140734,171026,305614,361651,362152	Atp1a1,Atp1a3,Hspa8,Ppp2ca,Prnp,Syp,Syn1,Map1a,Map2,Syt1,Pak1,Pacsin1,Nptn,Synpo,Dbnl,Picalm,Ctnnd2,Gng3,Dynll2,Akap5,Sptbn1,Prrt2,Hnrnpa3
3_Member	GO Cellular Components	GO:0014069	postsynaptic density	-7.89648	-6.06929	21/426	24211,24468,24672,24686,24804,24949,25152,25595,29431,29704,56064,60324,83527,89816,114028,114117,140734,171026,305614,361651,362152	Atp1a1,Hspa8,Ppp2ca,Prnp,Syp,Syn1,Map1a,Map2,Pak1,Pacsin1,Nptn,Synpo,Dbnl,Picalm,Ctnnd2,Gng3,Dynll2,Akap5,Sptbn1,Prrt2,Hnrnpa3
3_Member	GO Cellular Components	GO:0032279	asymmetric synapse	-7.77367	-5.9612	21/433	24211,24468,24672,24686,24804,24949,25152,25595,29431,29704,56064,60324,83527,89816,114028,114117,140734,171026,305614,361651,362152	Atp1a1,Hspa8,Ppp2ca,Prnp,Syp,Syn1,Map1a,Map2,Pak1,Pacsin1,Nptn,Synpo,Dbnl,Picalm,Ctnnd2,Gng3,Dynll2,Akap5,Sptbn1,Prrt2,Hnrnpa3
3_Member	GO Cellular Components	GO:0099572	postsynaptic specialization	-7.29067	-5.55738	21/462	24211,24468,24672,24686,24804,24949,25152,25595,29431,29704,56064,60324,83527,89816,114028,114117,140734,171026,305614,361651,362152	Atp1a1,Hspa8,Ppp2ca,Prnp,Syp,Syn1,Map1a,Map2,Pak1,Pacsin1,Nptn,Synpo,Dbnl,Picalm,Ctnnd2,Gng3,Dynll2,Akap5,Sptbn1,Prrt2,Hnrnpa3
4_Summary	GO Cellular Components	GO:0098978	glutamatergic synapse	-12.8926	-10.8071	30/520	24468,24674,25012,25393,25716,29144,29177,29211,29271,29275,29431,29704,29753,56064,60324,64303,116563,116657,117028,140670,140673,140694,140734,171026,252892,266777,305614,306439,361651,499903,24213,24804,29483,81677	Hspa8,Ppp3ca,Snap25,Bcan,Syt1,Canx,Hpca,Sptbn2,Cfl1,Actc1,Pak1,Pacsin1,Ywhae,Nptn,Synpo,Pfn1,Ap2m1,Cplx2,Bin1,Ap2b1,Napa,Dnm1,Dynll2,Akap5,Lgi1,Nptx1,Sptbn1,Gpm6a,Prrt2,Napb,Atp1a3,Syp,Slc1a3,Itpka
4_Member	GO Cellular Components	GO:0098978	glutamatergic synapse	-12.8926	-10.8071	30/520	24468,24674,25012,25393,25716,29144,29177,29211,29271,29275,29431,29704,29753,56064,60324,64303,116563,116657,117028,140670,140673,140694,140734,171026,252892,266777,305614,306439,361651,499903	Hspa8,Ppp3ca,Snap25,Bcan,Syt1,Canx,Hpca,Sptbn2,Cfl1,Actc1,Pak1,Pacsin1,Ywhae,Nptn,Synpo,Pfn1,Ap2m1,Cplx2,Bin1,Ap2b1,Napa,Dnm1,Dynll2,Akap5,Lgi1,Nptx1,Sptbn1,Gpm6a,Prrt2,Napb
4_Member	GO Cellular Components	GO:0044309	neuron spine	-5.66377	-4.13005	13/233	24213,24468,24674,24804,29144,29177,29271,29483,60324,81677,171026,306439,361651	Atp1a3,Hspa8,Ppp3ca,Syp,Canx,Hpca,Cfl1,Slc1a3,Synpo,Itpka,Akap5,Gpm6a,Prrt2
4_Member	GO Cellular Components	GO:0043197	dendritic spine	-4.99215	-3.55382	12/229	24213,24468,24674,29144,29177,29271,29483,60324,81677,171026,306439,361651	Atp1a3,Hspa8,Ppp3ca,Canx,Hpca,Cfl1,Slc1a3,Synpo,Itpka,Akap5,Gpm6a,Prrt2
5_Summary	GO Cellular Components	GO:0043025	neuronal cell body	-8.77427	-6.86489	30/763	24213,24264,24334,24468,24957,25012,25152,25415,25416,25595,25721,29144,29177,29211,29213,29219,29271,29483,29542,29593,60324,83427,83527,89816,114028,116657,171026,171373,306439,360687	Atp1a3,Ckb,Eno2,Hspa8,Glul,Snap25,Map1a,Crmp1,Dpysl2,Map2,Got2,Canx,Hpca,Sptbn2,Tubb4a,Snca,Cfl1,Slc1a3,Pebp1,Ckmt1,Synpo,Rack1,Dbnl,Picalm,Ctnnd2,Cplx2,Akap5,Slc12a5,Gpm6a,Cadm2
5_Member	GO Cellular Components	GO:0043025	neuronal cell body	-8.77427	-6.86489	30/763	24213,24264,24334,24468,24957,25012,25152,25415,25416,25595,25721,29144,29177,29211,29213,29219,29271,29483,29542,29593,60324,83427,83527,89816,114028,116657,171026,171373,306439,360687	Atp1a3,Ckb,Eno2,Hspa8,Glul,Snap25,Map1a,Crmp1,Dpysl2,Map2,Got2,Canx,Hpca,Sptbn2,Tubb4a,Snca,Cfl1,Slc1a3,Pebp1,Ckmt1,Synpo,Rack1,Dbnl,Picalm,Ctnnd2,Cplx2,Akap5,Slc12a5,Gpm6a,Cadm2
5_Member	GO Cellular Components	GO:0043204	perikaryon	-6.36245	-4.7541	13/202	24334,24468,24957,25415,25721,29177,29593,60324,83427,83527,114028,116657,171373	Eno2,Hspa8,Glul,Crmp1,Got2,Hpca,Ckmt1,Synpo,Rack1,Dbnl,Ctnnd2,Cplx2,Slc12a5
6_Summary	GO Cellular Components	GO:0005753	mitochondrial proton-transporting ATP synthase complex	-8.71331	-6.83592	7/21	65262,94271,116550,140608,192241,300677,690441	Atp5f1a,Atp5pf,Atp5f1c,Atp5me,Atp5po,Atp5mg,Atp5mf
6_Member	GO Cellular Components	GO:0005753	mitochondrial proton-transporting ATP synthase complex	-8.71331	-6.83592	7/21	65262,94271,116550,140608,192241,300677,690441	Atp5f1a,Atp5pf,Atp5f1c,Atp5me,Atp5po,Atp5mg,Atp5mf
6_Member	GO Cellular Components	GO:0045259	proton-transporting ATP synthase complex	-8.39756	-6.53933	7/23	65262,94271,116550,140608,192241,300677,690441	Atp5f1a,Atp5pf,Atp5f1c,Atp5me,Atp5po,Atp5mg,Atp5mf
6_Member	GO Cellular Components	GO:0000276	mitochondrial proton-transporting ATP synthase complex, coupling factor F(o)	-6.91892	-5.2628	5/12	94271,140608,192241,300677,690441	Atp5pf,Atp5me,Atp5po,Atp5mg,Atp5mf
6_Member	GO Cellular Components	GO:0045263	proton-transporting ATP synthase complex, coupling factor F(o)	-6.52405	-4.90656	5/14	94271,140608,192241,300677,690441	Atp5pf,Atp5me,Atp5po,Atp5mg,Atp5mf
6_Member	GO Cellular Components	GO:0016469	proton-transporting two-sector ATPase complex	-5.72168	-4.16449	7/53	65262,94271,116550,140608,192241,300677,690441	Atp5f1a,Atp5pf,Atp5f1c,Atp5me,Atp5po,Atp5mg,Atp5mf
6_Member	GO Cellular Components	GO:0033177	proton-transporting two-sector ATPase complex, proton-transporting domain	-5.14343	-3.67339	5/25	94271,140608,192241,300677,690441	Atp5pf,Atp5me,Atp5po,Atp5mg,Atp5mf
6_Member	GO Cellular Components	GO:0045261	proton-transporting ATP synthase complex, catalytic core F(1)	-4.33774	-2.99539	3/7	65262,116550,192241	Atp5f1a,Atp5f1c,Atp5po
6_Member	GO Cellular Components	GO:0033178	proton-transporting two-sector ATPase complex, catalytic domain	-2.87127	-1.68889	3/20	65262,116550,192241	Atp5f1a,Atp5f1c,Atp5po
7_Summary	GO Cellular Components	GO:0030427	site of polarized growth	-8.05772	-6.21529	16/235	24242,24333,24334,25012,25415,25416,25595,29219,29271,29431,29753,83527,288669,299850,306439,684352,24851,29211,29275,60324,116728,140734,297518,305614,493810,501841,727679,59114,171026,171350,116690	Calm1,Eno1,Eno2,Snap25,Crmp1,Dpysl2,Map2,Snca,Cfl1,Pak1,Ywhae,Dbnl,Arpc3,Dctn2,Gpm6a,Twf2,Tpm1,Sptbn2,Actc1,Synpo,Septin5,Dynll2,Arpc4,Sptbn1,Capza2,Coro1c,Pdxp,Slc9a3r1,Akap5,Pabpc1,Nfasc
7_Member	GO Cellular Components	GO:0030427	site of polarized growth	-8.05772	-6.21529	16/235	24242,24333,24334,25012,25415,25416,25595,29219,29271,29431,29753,83527,288669,299850,306439,684352	Calm1,Eno1,Eno2,Snap25,Crmp1,Dpysl2,Map2,Snca,Cfl1,Pak1,Ywhae,Dbnl,Arpc3,Dctn2,Gpm6a,Twf2
7_Member	GO Cellular Components	GO:0030426	growth cone	-7.38743	-5.62932	15/228	24242,24333,24334,25012,25415,25416,25595,29219,29271,29431,29753,288669,299850,306439,684352	Calm1,Eno1,Eno2,Snap25,Crmp1,Dpysl2,Map2,Snca,Cfl1,Pak1,Ywhae,Arpc3,Dctn2,Gpm6a,Twf2
7_Member	GO Cellular Components	GO:0015629	actin cytoskeleton	-6.84538	-5.19925	21/491	24851,25012,25415,25595,29211,29219,29271,29275,29431,60324,83527,116728,140734,288669,297518,299850,305614,493810,501841,684352,727679	Tpm1,Snap25,Crmp1,Map2,Sptbn2,Snca,Cfl1,Actc1,Pak1,Synpo,Dbnl,Septin5,Dynll2,Arpc3,Arpc4,Dctn2,Sptbn1,Capza2,Coro1c,Twf2,Pdxp
7_Member	GO Cellular Components	GO:0030175	filopodium	-4.52774	-3.15931	8/109	25012,25595,29271,29275,59114,171026,306439,684352	Snap25,Map2,Cfl1,Actc1,Slc9a3r1,Akap5,Gpm6a,Twf2
7_Member	GO Cellular Components	GO:0030027	lamellipodium	-4.15129	-2.82549	10/196	25012,29271,29275,29431,83527,171350,288669,501841,684352,727679	Snap25,Cfl1,Actc1,Pak1,Dbnl,Pabpc1,Arpc3,Coro1c,Twf2,Pdxp
7_Member	GO Cellular Components	GO:0098858	actin-based cell projection	-2.86074	-1.68174	9/237	25012,25595,29271,29275,59114,116690,171026,306439,684352	Snap25,Map2,Cfl1,Actc1,Slc9a3r1,Nfasc,Akap5,Gpm6a,Twf2
7_Member	GO Cellular Components	GO:0005884	actin filament	-2.54196	-1.39539	6/126	24851,29275,29431,83527,288669,684352	Tpm1,Actc1,Pak1,Dbnl,Arpc3,Twf2
8_Summary	GO Cellular Components	GO:0045121	membrane raft	-7.48301	-5.69857	20/409	24211,24333,24334,24468,24644,24672,24686,25012,25058,25390,25650,59114,64158,65262,81664,83529,83531,85333,171026,501841	Atp1a1,Eno1,Eno2,Hspa8,Pgk1,Ppp2ca,Prnp,Snap25,Hk1,Atp1b3,Atp1b1,Slc9a3r1,Tuba1a,Atp5f1a,Gnai2,Vdac1,Vdac2,Slc25a4,Akap5,Coro1c
8_Member	GO Cellular Components	GO:0045121	membrane raft	-7.48301	-5.69857	20/409	24211,24333,24334,24468,24644,24672,24686,25012,25058,25390,25650,59114,64158,65262,81664,83529,83531,85333,171026,501841	Atp1a1,Eno1,Eno2,Hspa8,Pgk1,Ppp2ca,Prnp,Snap25,Hk1,Atp1b3,Atp1b1,Slc9a3r1,Tuba1a,Atp5f1a,Gnai2,Vdac1,Vdac2,Slc25a4,Akap5,Coro1c
8_Member	GO Cellular Components	GO:0098857	membrane microdomain	-7.4655	-5.69442	20/410	24211,24333,24334,24468,24644,24672,24686,25012,25058,25390,25650,59114,64158,65262,81664,83529,83531,85333,171026,501841	Atp1a1,Eno1,Eno2,Hspa8,Pgk1,Ppp2ca,Prnp,Snap25,Hk1,Atp1b3,Atp1b1,Slc9a3r1,Tuba1a,Atp5f1a,Gnai2,Vdac1,Vdac2,Slc25a4,Akap5,Coro1c
9_Summary	GO Cellular Components	GO:0001917	photoreceptor inner segment	-7.331	-5.58548	9/66	24213,24334,24400,24468,25012,25630,116723,140694,303179	Atp1a3,Eno2,Gnb1,Hspa8,Snap25,Pkm,Pip4k2a,Dnm1,Guk1
9_Member	GO Cellular Components	GO:0001917	photoreceptor inner segment	-7.331	-5.58548	9/66	24213,24334,24400,24468,25012,25630,116723,140694,303179	Atp1a3,Eno2,Gnb1,Hspa8,Snap25,Pkm,Pip4k2a,Dnm1,Guk1
10_Summary	GO Cellular Components	GO:0097060	synaptic membrane	-7.22711	-5.50573	21/466	24213,24333,24334,24468,24804,25012,25716,29144,29271,29704,56064,83527,84008,89816,116561,117277,140694,171026,306439,360882,361651,24949,25531,83612,116638	Atp1a3,Eno1,Eno2,Hspa8,Syp,Snap25,Syt1,Canx,Cfl1,Pacsin1,Nptn,Dbnl,Cntnap1,Picalm,Cltb,Epn1,Dnm1,Akap5,Gpm6a,Cadm3,Prrt2,Syn1,Rab3a,Slc32a1,Slc17a7
10_Member	GO Cellular Components	GO:0097060	synaptic membrane	-7.22711	-5.50573	21/466	24213,24333,24334,24468,24804,25012,25716,29144,29271,29704,56064,83527,84008,89816,116561,117277,140694,171026,306439,360882,361651	Atp1a3,Eno1,Eno2,Hspa8,Syp,Snap25,Syt1,Canx,Cfl1,Pacsin1,Nptn,Dbnl,Cntnap1,Picalm,Cltb,Epn1,Dnm1,Akap5,Gpm6a,Cadm3,Prrt2
10_Member	GO Cellular Components	GO:0042734	presynaptic membrane	-6.97518	-5.30884	14/211	24213,24804,25012,25716,29144,56064,84008,89816,116561,117277,140694,306439,360882,361651	Atp1a3,Syp,Snap25,Syt1,Canx,Nptn,Cntnap1,Picalm,Cltb,Epn1,Dnm1,Gpm6a,Cadm3,Prrt2
10_Member	GO Cellular Components	GO:0048786	presynaptic active zone	-6.77395	-5.13757	10/100	24804,24949,25012,25531,29144,56064,83612,84008,116638,306439	Syp,Syn1,Snap25,Rab3a,Canx,Nptn,Slc32a1,Cntnap1,Slc17a7,Gpm6a
10_Member	GO Cellular Components	GO:0048787	presynaptic active zone membrane	-3.72529	-2.45689	5/48	25012,29144,56064,84008,306439	Snap25,Canx,Nptn,Cntnap1,Gpm6a
10_Member	GO Cellular Components	GO:0098889	intrinsic component of presynaptic membrane	-3.12032	-1.90261	7/134	24213,25012,29144,56064,306439,360882,361651	Atp1a3,Snap25,Canx,Nptn,Gpm6a,Cadm3,Prrt2
10_Member	GO Cellular Components	GO:0099056	integral component of presynaptic membrane	-2.62989	-1.47384	6/121	24213,29144,56064,306439,360882,361651	Atp1a3,Canx,Nptn,Gpm6a,Cadm3,Prrt2
10_Member	GO Cellular Components	GO:0099059	integral component of presynaptic active zone membrane	-2.4412	-1.30695	3/28	29144,56064,306439	Canx,Nptn,Gpm6a
10_Member	GO Cellular Components	GO:0098945	intrinsic component of presynaptic active zone membrane	-2.23734	-1.11801	3/33	29144,56064,306439	Canx,Nptn,Gpm6a
11_Summary	GO Cellular Components	GO:0099513	polymeric cytoskeletal fiber	-6.98358	-5.30884	25/665	24242,24468,24818,24851,25152,25416,25595,29213,29275,29431,58945,64158,81655,83527,117028,117280,140694,140734,191575,288669,298848,299850,362245,498736,684352	Calm1,Hspa8,Tcp1,Tpm1,Map1a,Dpysl2,Map2,Tubb4a,Actc1,Pak1,Dynll1,Tuba1a,Dync1li2,Dbnl,Bin1,Hnrnpu,Dnm1,Dynll2,Nme1,Arpc3,Mapre3,Dctn2,Map1lc3a,Tubb2a,Twf2
11_Member	GO Cellular Components	GO:0099513	polymeric cytoskeletal fiber	-6.98358	-5.30884	25/665	24242,24468,24818,24851,25152,25416,25595,29213,29275,29431,58945,64158,81655,83527,117028,117280,140694,140734,191575,288669,298848,299850,362245,498736,684352	Calm1,Hspa8,Tcp1,Tpm1,Map1a,Dpysl2,Map2,Tubb4a,Actc1,Pak1,Dynll1,Tuba1a,Dync1li2,Dbnl,Bin1,Hnrnpu,Dnm1,Dynll2,Nme1,Arpc3,Mapre3,Dctn2,Map1lc3a,Tubb2a,Twf2
11_Member	GO Cellular Components	GO:0005874	microtubule	-6.29828	-4.70766	18/397	24242,24468,24818,25152,25416,25595,29213,58945,64158,81655,117028,117280,140694,140734,298848,299850,362245,498736	Calm1,Hspa8,Tcp1,Map1a,Dpysl2,Map2,Tubb4a,Dynll1,Tuba1a,Dync1li2,Bin1,Hnrnpu,Dnm1,Dynll2,Mapre3,Dctn2,Map1lc3a,Tubb2a
12_Summary	GO Cellular Components	GO:0031252	cell leading edge	-6.98023	-5.30884	20/439	24851,25012,25595,29177,29271,29275,29431,29704,59114,83527,114562,171026,171350,171373,191575,288669,305614,501841,684352,727679,24400,116561	Tpm1,Snap25,Map2,Hpca,Cfl1,Actc1,Pak1,Pacsin1,Slc9a3r1,Dbnl,Cdc37,Akap5,Pabpc1,Slc12a5,Nme1,Arpc3,Sptbn1,Coro1c,Twf2,Pdxp,Gnb1,Cltb
12_Member	GO Cellular Components	GO:0031252	cell leading edge	-6.98023	-5.30884	20/439	24851,25012,25595,29177,29271,29275,29431,29704,59114,83527,114562,171026,171350,171373,191575,288669,305614,501841,684352,727679	Tpm1,Snap25,Map2,Hpca,Cfl1,Actc1,Pak1,Pacsin1,Slc9a3r1,Dbnl,Cdc37,Akap5,Pabpc1,Slc12a5,Nme1,Arpc3,Sptbn1,Coro1c,Twf2,Pdxp
12_Member	GO Cellular Components	GO:0031256	leading edge membrane	-6.07641	-4.50283	12/180	24851,25595,29177,29271,29431,29704,114562,171026,171373,191575,305614,727679	Tpm1,Map2,Hpca,Cfl1,Pak1,Pacsin1,Cdc37,Akap5,Slc12a5,Nme1,Sptbn1,Pdxp
12_Member	GO Cellular Components	GO:0032587	ruffle membrane	-5.3651	-3.86791	8/84	24851,25595,29271,29431,29704,114562,191575,727679	Tpm1,Map2,Cfl1,Pak1,Pacsin1,Cdc37,Nme1,Pdxp
12_Member	GO Cellular Components	GO:0031253	cell projection membrane	-5.06776	-3.61068	15/348	24400,24851,25595,29177,29271,29431,29704,59114,114562,116561,171026,171373,191575,305614,727679	Gnb1,Tpm1,Map2,Hpca,Cfl1,Pak1,Pacsin1,Slc9a3r1,Cdc37,Cltb,Akap5,Slc12a5,Nme1,Sptbn1,Pdxp
12_Member	GO Cellular Components	GO:0001726	ruffle	-4.61136	-3.23025	10/173	24851,25595,29271,29431,29704,59114,83527,114562,191575,727679	Tpm1,Map2,Cfl1,Pak1,Pacsin1,Slc9a3r1,Dbnl,Cdc37,Nme1,Pdxp
13_Summary	GO Cellular Components	GO:0060076	excitatory synapse	-6.68836	-5.06153	9/78	24804,25716,29211,50864,64303,89816,116638,171026,360882,24674,24949,56064,60324,117277	Syp,Syt1,Sptbn2,Ntm,Pfn1,Picalm,Slc17a7,Akap5,Cadm3,Ppp3ca,Syn1,Nptn,Synpo,Epn1
13_Member	GO Cellular Components	GO:0060076	excitatory synapse	-6.68836	-5.06153	9/78	24804,25716,29211,50864,64303,89816,116638,171026,360882	Syp,Syt1,Sptbn2,Ntm,Pfn1,Picalm,Slc17a7,Akap5,Cadm3
13_Member	GO Cellular Components	GO:0098685	Schaffer collateral - CA1 synapse	-4.30655	-2.9712	8/117	24674,24804,24949,56064,60324,64303,89816,117277	Ppp3ca,Syp,Syn1,Nptn,Synpo,Pfn1,Picalm,Epn1
13_Member	GO Cellular Components	GO:0098688	parallel fiber to Purkinje cell synapse	-3.32558	-2.08131	4/33	29211,64303,89816,360882	Sptbn2,Pfn1,Picalm,Cadm3
14_Summary	GO Cellular Components	GO:0044304	main axon	-6.31994	-4.72055	9/86	25152,25393,25595,29213,84008,116690,117028,140694,305614	Map1a,Bcan,Map2,Tubb4a,Cntnap1,Nfasc,Bin1,Dnm1,Sptbn1
14_Member	GO Cellular Components	GO:0044304	main axon	-6.31994	-4.72055	9/86	25152,25393,25595,29213,84008,116690,117028,140694,305614	Map1a,Bcan,Map2,Tubb4a,Cntnap1,Nfasc,Bin1,Dnm1,Sptbn1
14_Member	GO Cellular Components	GO:0043194	axon initial segment	-5.05461	-3.60387	5/26	25152,25393,25595,116690,117028	Map1a,Bcan,Map2,Nfasc,Bin1
14_Member	GO Cellular Components	GO:0033268	node of Ranvier	-3.00937	-1.80257	3/18	25393,116690,117028	Bcan,Nfasc,Bin1
15_Summary	GO Cellular Components	GO:0090533	cation-transporting ATPase complex	-5.90838	-4.34307	5/18	24211,24213,25390,25650,29693,25058,59114,65152,691335,29431,501841,25721,117028	Atp1a1,Atp1a3,Atp1b3,Atp1b1,Atp2a2,Hk1,Slc9a3r1,Pfkm,Septin6,Pak1,Coro1c,Got2,Bin1
15_Member	GO Cellular Components	GO:0090533	cation-transporting ATPase complex	-5.90838	-4.34307	5/18	24211,24213,25390,25650,29693	Atp1a1,Atp1a3,Atp1b3,Atp1b1,Atp2a2
15_Member	GO Cellular Components	GO:0098533	ATPase dependent transmembrane transport complex	-5.54451	-4.01979	5/21	24211,24213,25390,25650,29693	Atp1a1,Atp1a3,Atp1b3,Atp1b1,Atp2a2
15_Member	GO Cellular Components	GO:0005890	sodium:potassium-exchanging ATPase complex	-5.16347	-3.68679	4/12	24211,24213,25390,25650	Atp1a1,Atp1a3,Atp1b3,Atp1b1
15_Member	GO Cellular Components	GO:0036126	sperm flagellum	-2.73697	-1.56795	7/156	24211,25058,25390,25650,59114,65152,691335	Atp1a1,Hk1,Atp1b3,Atp1b1,Slc9a3r1,Pfkm,Septin6
15_Member	GO Cellular Components	GO:0097729	9+2 motile cilium	-2.49887	-1.3585	7/172	24211,25058,25390,25650,59114,65152,691335	Atp1a1,Hk1,Atp1b3,Atp1b1,Slc9a3r1,Pfkm,Septin6
15_Member	GO Cellular Components	GO:0014704	intercalated disc	-2.27499	-1.14846	4/63	24211,25650,29431,29693	Atp1a1,Atp1b1,Pak1,Atp2a2
15_Member	GO Cellular Components	GO:0005901	caveola	-2.2478	-1.12553	5/102	24211,25058,25390,25650,501841	Atp1a1,Hk1,Atp1b3,Atp1b1,Coro1c
15_Member	GO Cellular Components	GO:0030315	T-tubule	-2.11374	-1.00312	4/70	24211,25650,25721,117028	Atp1a1,Atp1b1,Got2,Bin1
16_Summary	GO Cellular Components	GO:0019867	outer membrane	-5.68632	-4.14492	12/196	24333,24686,25058,29219,29542,83529,83531,83532,85333,191575,294362,295922	Eno1,Prnp,Hk1,Snca,Pebp1,Vdac1,Vdac2,Vdac3,Slc25a4,Nme1,Cisd1,Mtch2
16_Member	GO Cellular Components	GO:0019867	outer membrane	-5.68632	-4.14492	12/196	24333,24686,25058,29219,29542,83529,83531,83532,85333,191575,294362,295922	Eno1,Prnp,Hk1,Snca,Pebp1,Vdac1,Vdac2,Vdac3,Slc25a4,Nme1,Cisd1,Mtch2
16_Member	GO Cellular Components	GO:0031968	organelle outer membrane	-5.68632	-4.14492	12/196	24333,24686,25058,29219,29542,83529,83531,83532,85333,191575,294362,295922	Eno1,Prnp,Hk1,Snca,Pebp1,Vdac1,Vdac2,Vdac3,Slc25a4,Nme1,Cisd1,Mtch2
16_Member	GO Cellular Components	GO:0005741	mitochondrial outer membrane	-5.53853	-4.01979	11/168	24686,25058,29219,29542,83529,83531,83532,85333,191575,294362,295922	Prnp,Hk1,Snca,Pebp1,Vdac1,Vdac2,Vdac3,Slc25a4,Nme1,Cisd1,Mtch2
16_Member	GO Cellular Components	GO:0046930	pore complex	-3.17866	-1.95353	4/36	83529,83531,83532,85333	Vdac1,Vdac2,Vdac3,Slc25a4
17_Summary	GO Cellular Components	GO:0005759	mitochondrial matrix	-5.52447	-4.01303	15/319	25104,25721,29219,29539,63864,81654,83529,83531,94173,117254,289950,291671,293481,299201,690163	Pc,Got2,Snca,Aldh2,Hsd17b10,Dlat,Vdac1,Vdac2,Idh3b,Prdx1,Pdhb,Hspa9,Tufm,Dlst,Oxct1
17_Member	GO Cellular Components	GO:0005759	mitochondrial matrix	-5.52447	-4.01303	15/319	25104,25721,29219,29539,63864,81654,83529,83531,94173,117254,289950,291671,293481,299201,690163	Pc,Got2,Snca,Aldh2,Hsd17b10,Dlat,Vdac1,Vdac2,Idh3b,Prdx1,Pdhb,Hspa9,Tufm,Dlst,Oxct1
17_Member	GO Cellular Components	GO:0009295	nucleoid	-3.76916	-2.48389	5/47	63864,83529,83531,291671,293481	Hsd17b10,Vdac1,Vdac2,Hspa9,Tufm
17_Member	GO Cellular Components	GO:0042645	mitochondrial nucleoid	-3.76916	-2.48389	5/47	63864,83529,83531,291671,293481	Hsd17b10,Vdac1,Vdac2,Hspa9,Tufm
18_Summary	GO Cellular Components	GO:0070069	cytochrome complex	-5.37397	-3.86971	6/39	29445,298762,300047,301011,497902,685322	Cox4i1,Cox7a2l,Cyc1,Uqcrc1,Uqcrq,Uqcr10
18_Member	GO Cellular Components	GO:0070069	cytochrome complex	-5.37397	-3.86971	6/39	29445,298762,300047,301011,497902,685322	Cox4i1,Cox7a2l,Cyc1,Uqcrc1,Uqcrq,Uqcr10
18_Member	GO Cellular Components	GO:0005750	mitochondrial respiratory chain complex III	-5.16347	-3.68679	4/12	300047,301011,497902,685322	Cyc1,Uqcrc1,Uqcrq,Uqcr10
18_Member	GO Cellular Components	GO:0045275	respiratory chain complex III	-5.16347	-3.68679	4/12	300047,301011,497902,685322	Cyc1,Uqcrc1,Uqcrq,Uqcr10
19_Summary	GO Cellular Components	GO:0043209	myelin sheath	-5.07119	-3.61068	7/66	24213,24242,24957,25416,29213,50664,64158	Atp1a3,Calm1,Glul,Dpysl2,Tubb4a,Gnao1,Tuba1a
19_Member	GO Cellular Components	GO:0043209	myelin sheath	-5.07119	-3.61068	7/66	24213,24242,24957,25416,29213,50664,64158	Atp1a3,Calm1,Glul,Dpysl2,Tubb4a,Gnao1,Tuba1a
20_Summary	GO Cellular Components	GO:0098833	presynaptic endocytic zone	-5.00756	-3.56307	4/13	29704,89816,116561,140694,24468,29693	Pacsin1,Picalm,Cltb,Dnm1,Hspa8,Atp2a2
20_Member	GO Cellular Components	GO:0098833	presynaptic endocytic zone	-5.00756	-3.56307	4/13	29704,89816,116561,140694	Pacsin1,Picalm,Cltb,Dnm1
20_Member	GO Cellular Components	GO:0098835	presynaptic endocytic zone membrane	-3.96468	-2.64822	3/9	89816,116561,140694	Picalm,Cltb,Dnm1
20_Member	GO Cellular Components	GO:0097470	ribbon synapse	-3.95257	-2.6407	4/23	24468,29693,29704,140694	Hspa8,Atp2a2,Pacsin1,Dnm1
20_Member	GO Cellular Components	GO:0098684	photoreceptor ribbon synapse	-3.55726	-2.30109	3/12	24468,29704,140694	Hspa8,Pacsin1,Dnm1
Analysis type: Gene Ontology: Molecular Function (GO:MF) - Metascape
GroupID	Category	Term	Description	LogP	Log(q-value)	InTerm_InList	Genes	Symbols
1_Summary	GO Molecular Functions	GO:0017111	nucleoside-triphosphatase activity	-9.9834	-6.32388	25/472	24400,24468,25058,25531,29213,29448,50664,64158,65262,79117,81664,81757,84379,94271,114612,116550,116728,140694,192241,266759,291671,293481,303831,498736,691335,191575	Gnb1,Hspa8,Hk1,Rab3a,Tubb4a,Rab7a,Gnao1,Tuba1a,Atp5f1a,Arf5,Gnai2,Rala,Rab6a,Atp5pf,Ddx39b,Atp5f1c,Septin5,Dnm1,Atp5po,Hspa4,Hspa9,Tufm,Eif4a2,Tubb2a,Septin6,Nme1
1_Member	GO Molecular Functions	GO:0017111	nucleoside-triphosphatase activity	-9.9834	-6.32388	25/472	24400,24468,25058,25531,29213,29448,50664,64158,65262,79117,81664,81757,84379,94271,114612,116550,116728,140694,192241,266759,291671,293481,303831,498736,691335	Gnb1,Hspa8,Hk1,Rab3a,Tubb4a,Rab7a,Gnao1,Tuba1a,Atp5f1a,Arf5,Gnai2,Rala,Rab6a,Atp5pf,Ddx39b,Atp5f1c,Septin5,Dnm1,Atp5po,Hspa4,Hspa9,Tufm,Eif4a2,Tubb2a,Septin6
1_Member	GO Molecular Functions	GO:0016462	pyrophosphatase activity	-9.05373	-5.99071	25/523	24400,24468,25058,25531,29213,29448,50664,64158,65262,79117,81664,81757,84379,94271,114612,116550,116728,140694,192241,266759,291671,293481,303831,498736,691335	Gnb1,Hspa8,Hk1,Rab3a,Tubb4a,Rab7a,Gnao1,Tuba1a,Atp5f1a,Arf5,Gnai2,Rala,Rab6a,Atp5pf,Ddx39b,Atp5f1c,Septin5,Dnm1,Atp5po,Hspa4,Hspa9,Tufm,Eif4a2,Tubb2a,Septin6
1_Member	GO Molecular Functions	GO:0016817	hydrolase activity, acting on acid anhydrides	-8.9688	-5.99071	25/528	24400,24468,25058,25531,29213,29448,50664,64158,65262,79117,81664,81757,84379,94271,114612,116550,116728,140694,192241,266759,291671,293481,303831,498736,691335	Gnb1,Hspa8,Hk1,Rab3a,Tubb4a,Rab7a,Gnao1,Tuba1a,Atp5f1a,Arf5,Gnai2,Rala,Rab6a,Atp5pf,Ddx39b,Atp5f1c,Septin5,Dnm1,Atp5po,Hspa4,Hspa9,Tufm,Eif4a2,Tubb2a,Septin6
1_Member	GO Molecular Functions	GO:0016818	hydrolase activity, acting on acid anhydrides, in phosphorus-containing anhydrides	-8.9688	-5.99071	25/528	24400,24468,25058,25531,29213,29448,50664,64158,65262,79117,81664,81757,84379,94271,114612,116550,116728,140694,192241,266759,291671,293481,303831,498736,691335	Gnb1,Hspa8,Hk1,Rab3a,Tubb4a,Rab7a,Gnao1,Tuba1a,Atp5f1a,Arf5,Gnai2,Rala,Rab6a,Atp5pf,Ddx39b,Atp5f1c,Septin5,Dnm1,Atp5po,Hspa4,Hspa9,Tufm,Eif4a2,Tubb2a,Septin6
1_Member	GO Molecular Functions	GO:0003924	GTPase activity	-5.88985	-3.38748	15/298	24400,25531,29213,29448,50664,64158,79117,81664,81757,84379,116728,140694,293481,498736,691335	Gnb1,Rab3a,Tubb4a,Rab7a,Gnao1,Tuba1a,Arf5,Gnai2,Rala,Rab6a,Septin5,Dnm1,Tufm,Tubb2a,Septin6
1_Member	GO Molecular Functions	GO:0005525	GTP binding	-4.97943	-2.77949	15/354	25531,29213,29448,50664,64158,79117,81664,81757,84379,116728,140694,191575,293481,498736,691335	Rab3a,Tubb4a,Rab7a,Gnao1,Tuba1a,Arf5,Gnai2,Rala,Rab6a,Septin5,Dnm1,Nme1,Tufm,Tubb2a,Septin6
1_Member	GO Molecular Functions	GO:0032561	guanyl ribonucleotide binding	-4.65834	-2.49979	15/377	25531,29213,29448,50664,64158,79117,81664,81757,84379,116728,140694,191575,293481,498736,691335	Rab3a,Tubb4a,Rab7a,Gnao1,Tuba1a,Arf5,Gnai2,Rala,Rab6a,Septin5,Dnm1,Nme1,Tufm,Tubb2a,Septin6
1_Member	GO Molecular Functions	GO:0019001	guanyl nucleotide binding	-4.64497	-2.49939	15/378	25531,29213,29448,50664,64158,79117,81664,81757,84379,116728,140694,191575,293481,498736,691335	Rab3a,Tubb4a,Rab7a,Gnao1,Tuba1a,Arf5,Gnai2,Rala,Rab6a,Septin5,Dnm1,Nme1,Tufm,Tubb2a,Septin6
2_Summary	GO Molecular Functions	GO:0046933	proton-transporting ATP synthase activity, rotational mechanism	-9.69991	-6.32388	7/16	65262,94271,116550,140608,192241,300677,690441,83612,85333,245959,24957,25104,25012,83529,83531,83532,116638,306439	Atp5f1a,Atp5pf,Atp5f1c,Atp5me,Atp5po,Atp5mg,Atp5mf,Slc32a1,Slc25a4,Slc25a3,Glul,Pc,Snap25,Vdac1,Vdac2,Vdac3,Slc17a7,Gpm6a
2_Member	GO Molecular Functions	GO:0046933	proton-transporting ATP synthase activity, rotational mechanism	-9.69991	-6.32388	7/16	65262,94271,116550,140608,192241,300677,690441	Atp5f1a,Atp5pf,Atp5f1c,Atp5me,Atp5po,Atp5mg,Atp5mf
2_Member	GO Molecular Functions	GO:0015252	proton channel activity	-8.55107	-5.65216	7/22	65262,94271,116550,140608,192241,300677,690441	Atp5f1a,Atp5pf,Atp5f1c,Atp5me,Atp5po,Atp5mg,Atp5mf
2_Member	GO Molecular Functions	GO:0015078	proton transmembrane transporter activity	-6.42012	-3.82224	10/109	65262,83612,85333,94271,116550,140608,192241,245959,300677,690441	Atp5f1a,Slc32a1,Slc25a4,Atp5pf,Atp5f1c,Atp5me,Atp5po,Slc25a3,Atp5mg,Atp5mf
2_Member	GO Molecular Functions	GO:0016874	ligase activity	-3.98888	-1.96504	9/166	24957,25104,65262,94271,116550,140608,192241,300677,690441	Glul,Pc,Atp5f1a,Atp5pf,Atp5f1c,Atp5me,Atp5po,Atp5mg,Atp5mf
2_Member	GO Molecular Functions	GO:0005216	ion channel activity	-3.06596	-1.24776	13/419	25012,65262,83529,83531,83532,94271,116550,116638,140608,192241,300677,306439,690441	Snap25,Atp5f1a,Vdac1,Vdac2,Vdac3,Atp5pf,Atp5f1c,Slc17a7,Atp5me,Atp5po,Atp5mg,Gpm6a,Atp5mf
2_Member	GO Molecular Functions	GO:0015267	channel activity	-2.62209	-0.869308	13/470	25012,65262,83529,83531,83532,94271,116550,116638,140608,192241,300677,306439,690441	Snap25,Atp5f1a,Vdac1,Vdac2,Vdac3,Atp5pf,Atp5f1c,Slc17a7,Atp5me,Atp5po,Atp5mg,Gpm6a,Atp5mf
2_Member	GO Molecular Functions	GO:0022803	passive transmembrane transporter activity	-2.62209	-0.869308	13/470	25012,65262,83529,83531,83532,94271,116550,116638,140608,192241,300677,306439,690441	Snap25,Atp5f1a,Vdac1,Vdac2,Vdac3,Atp5pf,Atp5f1c,Slc17a7,Atp5me,Atp5po,Atp5mg,Gpm6a,Atp5mf
2_Member	GO Molecular Functions	GO:0005261	cation channel activity	-2.43008	-0.744514	10/327	25012,65262,83529,94271,116550,140608,192241,300677,306439,690441	Snap25,Atp5f1a,Vdac1,Atp5pf,Atp5f1c,Atp5me,Atp5po,Atp5mg,Gpm6a,Atp5mf
3_Summary	GO Molecular Functions	GO:0003779	actin binding	-8.07645	-5.24449	21/416	24851,24949,25152,25595,29177,29211,29219,29271,60324,64303,83527,117028,117280,171026,288669,297518,305614,309557,493810,501841,684352,29213,64158,498736	Tpm1,Syn1,Map1a,Map2,Hpca,Sptbn2,Snca,Cfl1,Synpo,Pfn1,Dbnl,Bin1,Hnrnpu,Akap5,Arpc3,Arpc4,Sptbn1,Epb41l2,Capza2,Coro1c,Twf2,Tubb4a,Tuba1a,Tubb2a
3_Member	GO Molecular Functions	GO:0003779	actin binding	-8.07645	-5.24449	21/416	24851,24949,25152,25595,29177,29211,29219,29271,60324,64303,83527,117028,117280,171026,288669,297518,305614,309557,493810,501841,684352	Tpm1,Syn1,Map1a,Map2,Hpca,Sptbn2,Snca,Cfl1,Synpo,Pfn1,Dbnl,Bin1,Hnrnpu,Akap5,Arpc3,Arpc4,Sptbn1,Epb41l2,Capza2,Coro1c,Twf2
3_Member	GO Molecular Functions	GO:0005200	structural constituent of cytoskeleton	-5.25452	-3.00883	7/62	29211,29213,64158,288669,297518,305614,498736	Sptbn2,Tubb4a,Tuba1a,Arpc3,Arpc4,Sptbn1,Tubb2a
3_Member	GO Molecular Functions	GO:0051015	actin filament binding	-4.59978	-2.46679	11/211	24851,29211,29271,83527,117028,288669,297518,305614,493810,501841,684352	Tpm1,Sptbn2,Cfl1,Dbnl,Bin1,Arpc3,Arpc4,Sptbn1,Capza2,Coro1c,Twf2
4_Summary	GO Molecular Functions	GO:0051087	chaperone binding	-7.48105	-4.70708	11/108	24211,24213,24468,24686,81800,114562,117028,171139,192277,291671,299201,24333,29219,360678,727679,24818,29144,64202	Atp1a1,Atp1a3,Hspa8,Prnp,St13,Cdc37,Bin1,Timm9,Stip1,Hspa9,Dlst,Eno1,Snca,Arhgdia,Pdxp,Tcp1,Canx,Calr
4_Member	GO Molecular Functions	GO:0051087	chaperone binding	-7.48105	-4.70708	11/108	24211,24213,24468,24686,81800,114562,117028,171139,192277,291671,299201	Atp1a1,Atp1a3,Hspa8,Prnp,St13,Cdc37,Bin1,Timm9,Stip1,Hspa9,Dlst
4_Member	GO Molecular Functions	GO:0031072	heat shock protein binding	-5.20485	-2.99018	10/148	24333,24468,29219,81800,114562,192277,291671,299201,360678,727679	Eno1,Hspa8,Snca,St13,Cdc37,Stip1,Hspa9,Dlst,Arhgdia,Pdxp
4_Member	GO Molecular Functions	GO:0051082	unfolded protein binding	-4.24945	-2.16346	7/88	24468,24818,29144,64202,81800,114562,291671	Hspa8,Tcp1,Canx,Calr,St13,Cdc37,Hspa9
5_Summary	GO Molecular Functions	GO:0060090	molecular adaptor activity	-7.08957	-4.36675	18/351	24400,24468,25012,25152,25390,25650,59114,81667,83427,116563,116728,117277,140673,171026,296966,297518,499903,691335	Gnb1,Hspa8,Snap25,Map1a,Atp1b3,Atp1b1,Slc9a3r1,Gnb2,Rack1,Ap2m1,Septin5,Epn1,Napa,Akap5,Chchd3,Arpc4,Napb,Septin6
5_Member	GO Molecular Functions	GO:0060090	molecular adaptor activity	-7.08957	-4.36675	18/351	24400,24468,25012,25152,25390,25650,59114,81667,83427,116563,116728,117277,140673,171026,296966,297518,499903,691335	Gnb1,Hspa8,Snap25,Map1a,Atp1b3,Atp1b1,Slc9a3r1,Gnb2,Rack1,Ap2m1,Septin5,Epn1,Napa,Akap5,Chchd3,Arpc4,Napb,Septin6
5_Member	GO Molecular Functions	GO:0030674	protein-macromolecule adaptor activity	-5.42656	-3.11123	14/284	24400,24468,25012,25152,25390,25650,59114,81667,83427,116563,117277,140673,297518,499903	Gnb1,Hspa8,Snap25,Map1a,Atp1b3,Atp1b1,Slc9a3r1,Gnb2,Rack1,Ap2m1,Epn1,Napa,Arpc4,Napb
6_Summary	GO Molecular Functions	GO:0044325	transmembrane transporter binding	-6.93383	-4.25677	12/150	24242,24672,24686,25012,29693,29753,56064,83529,116563,117277,171444,363159	Calm1,Ppp2ca,Prnp,Snap25,Atp2a2,Ywhae,Nptn,Vdac1,Ap2m1,Epn1,Pacs1,Gpd1l
6_Member	GO Molecular Functions	GO:0044325	transmembrane transporter binding	-6.93383	-4.25677	12/150	24242,24672,24686,25012,29693,29753,56064,83529,116563,117277,171444,363159	Calm1,Ppp2ca,Prnp,Snap25,Atp2a2,Ywhae,Nptn,Vdac1,Ap2m1,Epn1,Pacs1,Gpd1l
7_Summary	GO Molecular Functions	GO:0008289	lipid binding	-6.81074	-4.17507	27/778	24211,24468,24804,25716,25721,29211,29219,29271,29525,29542,29668,29704,63864,64303,79131,83529,83531,89816,116563,116728,117028,117277,192241,305614,360678,362245,684352	Atp1a1,Hspa8,Syp,Syt1,Got2,Sptbn2,Snca,Cfl1,Pitpna,Pebp1,Psma1,Pacsin1,Hsd17b10,Pfn1,Fabp3,Vdac1,Vdac2,Picalm,Ap2m1,Septin5,Bin1,Epn1,Atp5po,Sptbn1,Arhgdia,Map1lc3a,Twf2
7_Member	GO Molecular Functions	GO:0008289	lipid binding	-6.81074	-4.17507	27/778	24211,24468,24804,25716,25721,29211,29219,29271,29525,29542,29668,29704,63864,64303,79131,83529,83531,89816,116563,116728,117028,117277,192241,305614,360678,362245,684352	Atp1a1,Hspa8,Syp,Syt1,Got2,Sptbn2,Snca,Cfl1,Pitpna,Pebp1,Psma1,Pacsin1,Hsd17b10,Pfn1,Fabp3,Vdac1,Vdac2,Picalm,Ap2m1,Septin5,Bin1,Epn1,Atp5po,Sptbn1,Arhgdia,Map1lc3a,Twf2
7_Member	GO Molecular Functions	GO:0005543	phospholipid binding	-5.29853	-3.03645	18/467	24468,25716,25721,29211,29219,29271,29525,29704,64303,83529,83531,89816,116728,117028,117277,305614,362245,684352	Hspa8,Syt1,Got2,Sptbn2,Snca,Cfl1,Pitpna,Pacsin1,Pfn1,Vdac1,Vdac2,Picalm,Septin5,Bin1,Epn1,Sptbn1,Map1lc3a,Twf2
8_Summary	GO Molecular Functions	GO:0000149	SNARE binding	-6.13296	-3.56985	10/117	24804,25012,25716,29219,89816,116657,116728,140673,361651,499903,24242,24949	Syp,Snap25,Syt1,Snca,Picalm,Cplx2,Septin5,Napa,Prrt2,Napb,Calm1,Syn1
8_Member	GO Molecular Functions	GO:0000149	SNARE binding	-6.13296	-3.56985	10/117	24804,25012,25716,29219,89816,116657,116728,140673,361651,499903	Syp,Snap25,Syt1,Snca,Picalm,Cplx2,Septin5,Napa,Prrt2,Napb
8_Member	GO Molecular Functions	GO:0019905	syntaxin binding	-5.60973	-3.21143	8/78	24804,25012,25716,116657,116728,140673,361651,499903	Syp,Snap25,Syt1,Cplx2,Septin5,Napa,Prrt2,Napb
8_Member	GO Molecular Functions	GO:0017075	syntaxin-1 binding	-5.23642	-3.00651	5/24	24804,25012,25716,116657,361651	Syp,Snap25,Syt1,Cplx2,Prrt2
8_Member	GO Molecular Functions	GO:0048306	calcium-dependent protein binding	-2.47914	-0.765874	5/90	24242,24949,25012,25716,116657	Calm1,Syn1,Snap25,Syt1,Cplx2
9_Summary	GO Molecular Functions	GO:0022890	inorganic cation transmembrane transporter activity	-5.88845	-3.38748	21/562	24211,24213,25012,25390,25650,29483,29693,65262,83529,83612,85333,94271,116550,116638,140608,171373,192241,245959,300677,306439,690441,65042,83531,83532,301458,59114,309111	Atp1a1,Atp1a3,Snap25,Atp1b3,Atp1b1,Slc1a3,Atp2a2,Atp5f1a,Vdac1,Slc32a1,Slc25a4,Atp5pf,Atp5f1c,Slc17a7,Atp5me,Slc12a5,Atp5po,Slc25a3,Atp5mg,Gpm6a,Atp5mf,Sfxn3,Vdac2,Vdac3,Ndufs1,Slc9a3r1,Slc25a22
9_Member	GO Molecular Functions	GO:0022890	inorganic cation transmembrane transporter activity	-5.88845	-3.38748	21/562	24211,24213,25012,25390,25650,29483,29693,65262,83529,83612,85333,94271,116550,116638,140608,171373,192241,245959,300677,306439,690441	Atp1a1,Atp1a3,Snap25,Atp1b3,Atp1b1,Slc1a3,Atp2a2,Atp5f1a,Vdac1,Slc32a1,Slc25a4,Atp5pf,Atp5f1c,Slc17a7,Atp5me,Slc12a5,Atp5po,Slc25a3,Atp5mg,Gpm6a,Atp5mf
9_Member	GO Molecular Functions	GO:0008324	cation transmembrane transporter activity	-5.85794	-3.385	22/613	24211,24213,25012,25390,25650,29483,29693,65042,65262,83529,83612,85333,94271,116550,116638,140608,171373,192241,245959,300677,306439,690441	Atp1a1,Atp1a3,Snap25,Atp1b3,Atp1b1,Slc1a3,Atp2a2,Sfxn3,Atp5f1a,Vdac1,Slc32a1,Slc25a4,Atp5pf,Atp5f1c,Slc17a7,Atp5me,Slc12a5,Atp5po,Slc25a3,Atp5mg,Gpm6a,Atp5mf
9_Member	GO Molecular Functions	GO:0015318	inorganic molecular entity transmembrane transporter activity	-5.62494	-3.21143	23/684	24211,24213,25012,25390,25650,29483,29693,65262,83529,83531,83532,83612,85333,94271,116550,116638,140608,171373,192241,245959,300677,306439,690441	Atp1a1,Atp1a3,Snap25,Atp1b3,Atp1b1,Slc1a3,Atp2a2,Atp5f1a,Vdac1,Vdac2,Vdac3,Slc32a1,Slc25a4,Atp5pf,Atp5f1c,Slc17a7,Atp5me,Slc12a5,Atp5po,Slc25a3,Atp5mg,Gpm6a,Atp5mf
9_Member	GO Molecular Functions	GO:0022853	active ion transmembrane transporter activity	-4.95411	-2.76841	12/231	24211,24213,25390,25650,29483,29693,65042,83612,85333,116638,171373,245959	Atp1a1,Atp1a3,Atp1b3,Atp1b1,Slc1a3,Atp2a2,Sfxn3,Slc32a1,Slc25a4,Slc17a7,Slc12a5,Slc25a3
9_Member	GO Molecular Functions	GO:0022804	active transmembrane transporter activity	-3.70058	-1.76388	13/359	24211,24213,25390,25650,29483,29693,65042,83612,85333,116638,171373,245959,301458	Atp1a1,Atp1a3,Atp1b3,Atp1b1,Slc1a3,Atp2a2,Sfxn3,Slc32a1,Slc25a4,Slc17a7,Slc12a5,Slc25a3,Ndufs1
9_Member	GO Molecular Functions	GO:0015171	amino acid transmembrane transporter activity	-3.48677	-1.59505	6/83	29483,59114,65042,83612,116638,309111	Slc1a3,Slc9a3r1,Sfxn3,Slc32a1,Slc17a7,Slc25a22
9_Member	GO Molecular Functions	GO:0005313	L-glutamate transmembrane transporter activity	-3.34571	-1.4703	3/14	29483,116638,309111	Slc1a3,Slc17a7,Slc25a22
9_Member	GO Molecular Functions	GO:0008509	anion transmembrane transporter activity	-3.34117	-1.4703	11/293	29483,59114,65042,83529,83531,83532,83612,85333,116638,171373,309111	Slc1a3,Slc9a3r1,Sfxn3,Vdac1,Vdac2,Vdac3,Slc32a1,Slc25a4,Slc17a7,Slc12a5,Slc25a22
9_Member	GO Molecular Functions	GO:0015172	acidic amino acid transmembrane transporter activity	-3.08499	-1.25919	3/17	29483,116638,309111	Slc1a3,Slc17a7,Slc25a22
9_Member	GO Molecular Functions	GO:0015291	secondary active transmembrane transporter activity	-2.45923	-0.758071	8/222	24213,29483,65042,83612,85333,116638,171373,245959	Atp1a3,Slc1a3,Sfxn3,Slc32a1,Slc25a4,Slc17a7,Slc12a5,Slc25a3
9_Member	GO Molecular Functions	GO:0008514	organic anion transmembrane transporter activity	-2.45741	-0.758071	7/175	29483,59114,65042,83612,85333,116638,309111	Slc1a3,Slc9a3r1,Sfxn3,Slc32a1,Slc25a4,Slc17a7,Slc25a22
9_Member	GO Molecular Functions	GO:0015294	solute:cation symporter activity	-2.43806	-0.744514	5/92	29483,83612,116638,171373,245959	Slc1a3,Slc32a1,Slc17a7,Slc12a5,Slc25a3
9_Member	GO Molecular Functions	GO:0015179	L-amino acid transmembrane transporter activity	-2.3507	-0.690677	4/60	29483,83612,116638,309111	Slc1a3,Slc32a1,Slc17a7,Slc25a22
9_Member	GO Molecular Functions	GO:0046873	metal ion transmembrane transporter activity	-2.16782	-0.558943	11/414	24211,24213,25012,25390,25650,29483,29693,83529,116638,171373,306439	Atp1a1,Atp1a3,Snap25,Atp1b3,Atp1b1,Slc1a3,Atp2a2,Vdac1,Slc17a7,Slc12a5,Gpm6a
9_Member	GO Molecular Functions	GO:0046943	carboxylic acid transmembrane transporter activity	-2.1066	-0.505084	6/155	29483,59114,65042,83612,116638,309111	Slc1a3,Slc9a3r1,Sfxn3,Slc32a1,Slc17a7,Slc25a22
9_Member	GO Molecular Functions	GO:0005342	organic acid transmembrane transporter activity	-2.09349	-0.502794	6/156	29483,59114,65042,83612,116638,309111	Slc1a3,Slc9a3r1,Sfxn3,Slc32a1,Slc17a7,Slc25a22
9_Member	GO Molecular Functions	GO:0015175	neutral amino acid transmembrane transporter activity	-2.03445	-0.454303	3/39	29483,65042,83612	Slc1a3,Sfxn3,Slc32a1
10_Summary	GO Molecular Functions	GO:0008022	protein C-terminus binding	-5.66377	-3.21716	13/233	24672,25531,25650,25716,29693,58945,65152,83527,114562,140694,171350,192277,298848	Ppp2ca,Rab3a,Atp1b1,Syt1,Atp2a2,Dynll1,Pfkm,Dbnl,Cdc37,Dnm1,Pabpc1,Stip1,Mapre3
10_Member	GO Molecular Functions	GO:0008022	protein C-terminus binding	-5.66377	-3.21716	13/233	24672,25531,25650,25716,29693,58945,65152,83527,114562,140694,171350,192277,298848	Ppp2ca,Rab3a,Atp1b1,Syt1,Atp2a2,Dynll1,Pfkm,Dbnl,Cdc37,Dnm1,Pabpc1,Stip1,Mapre3
11_Summary	GO Molecular Functions	GO:0005391	P-type sodium:potassium-exchanging transporter activity	-5.52826	-3.19362	4/10	24211,24213,25390,25650,29693,25531,84379,24674,81757,171373,301458,29483,116638,25012	Atp1a1,Atp1a3,Atp1b3,Atp1b1,Atp2a2,Rab3a,Rab6a,Ppp3ca,Rala,Slc12a5,Ndufs1,Slc1a3,Slc17a7,Snap25
11_Member	GO Molecular Functions	GO:0005391	P-type sodium:potassium-exchanging transporter activity	-5.52826	-3.19362	4/10	24211,24213,25390,25650	Atp1a1,Atp1a3,Atp1b3,Atp1b1
11_Member	GO Molecular Functions	GO:0008554	P-type sodium transporter activity	-5.52826	-3.19362	4/10	24211,24213,25390,25650	Atp1a1,Atp1a3,Atp1b3,Atp1b1
11_Member	GO Molecular Functions	GO:0008556	P-type potassium transmembrane transporter activity	-5.52826	-3.19362	4/10	24211,24213,25390,25650	Atp1a1,Atp1a3,Atp1b3,Atp1b1
11_Member	GO Molecular Functions	GO:0015662	P-type ion transporter activity	-5.33394	-3.05483	5/23	24211,24213,25390,25650,29693	Atp1a1,Atp1a3,Atp1b3,Atp1b1,Atp2a2
11_Member	GO Molecular Functions	GO:0140358	P-type transmembrane transporter activity	-5.33394	-3.05483	5/23	24211,24213,25390,25650,29693	Atp1a1,Atp1a3,Atp1b3,Atp1b1,Atp2a2
11_Member	GO Molecular Functions	GO:0001671	ATPase activator activity	-3.95257	-1.94761	4/23	25390,25531,25650,84379	Atp1b3,Rab3a,Atp1b1,Rab6a
11_Member	GO Molecular Functions	GO:0051117	ATPase binding	-3.8965	-1.90964	7/100	24211,24674,25390,25531,25650,81757,84379	Atp1a1,Ppp3ca,Atp1b3,Rab3a,Atp1b1,Rala,Rab6a
11_Member	GO Molecular Functions	GO:0019829	ATPase-coupled cation transmembrane transporter activity	-3.76916	-1.8081	5/47	24211,24213,25390,25650,29693	Atp1a1,Atp1a3,Atp1b3,Atp1b1,Atp2a2
11_Member	GO Molecular Functions	GO:0140677	molecular function activator activity	-3.13274	-1.28819	4/37	25390,25531,25650,84379	Atp1b3,Rab3a,Atp1b1,Rab6a
11_Member	GO Molecular Functions	GO:0015399	primary active transmembrane transporter activity	-2.80141	-1.02198	7/152	24211,24213,25390,25650,29693,171373,301458	Atp1a1,Atp1a3,Atp1b3,Atp1b1,Atp2a2,Slc12a5,Ndufs1
11_Member	GO Molecular Functions	GO:0042626	ATPase-coupled transmembrane transporter activity	-2.76086	-0.992288	6/114	24211,24213,25390,25650,29693,171373	Atp1a1,Atp1a3,Atp1b3,Atp1b1,Atp2a2,Slc12a5
11_Member	GO Molecular Functions	GO:0015081	sodium ion transmembrane transporter activity	-2.28763	-0.648001	6/142	24211,24213,25390,25650,29483,116638	Atp1a1,Atp1a3,Atp1b3,Atp1b1,Slc1a3,Slc17a7
11_Member	GO Molecular Functions	GO:0015079	potassium ion transmembrane transporter activity	-2.09349	-0.502794	6/156	24211,24213,25012,25390,25650,171373	Atp1a1,Atp1a3,Snap25,Atp1b3,Atp1b1,Slc12a5
12_Summary	GO Molecular Functions	GO:0016887	ATP hydrolysis activity	-4.6769	-2.50499	10/170	24468,25058,65262,94271,114612,116550,192241,266759,291671,303831,24211,24213,25390,25650,29275,29693,171373	Hspa8,Hk1,Atp5f1a,Atp5pf,Ddx39b,Atp5f1c,Atp5po,Hspa4,Hspa9,Eif4a2,Atp1a1,Atp1a3,Atp1b3,Atp1b1,Actc1,Atp2a2,Slc12a5
12_Member	GO Molecular Functions	GO:0016887	ATP hydrolysis activity	-4.6769	-2.50499	10/170	24468,25058,65262,94271,114612,116550,192241,266759,291671,303831	Hspa8,Hk1,Atp5f1a,Atp5pf,Ddx39b,Atp5f1c,Atp5po,Hspa4,Hspa9,Eif4a2
12_Member	GO Molecular Functions	GO:0140657	ATP-dependent activity	-4.42538	-2.31652	17/492	24211,24213,24468,25058,25390,25650,29275,29693,65262,94271,114612,116550,171373,192241,266759,291671,303831	Atp1a1,Atp1a3,Hspa8,Hk1,Atp1b3,Atp1b1,Actc1,Atp2a2,Atp5f1a,Atp5pf,Ddx39b,Atp5f1c,Slc12a5,Atp5po,Hspa4,Hspa9,Eif4a2
13_Summary	GO Molecular Functions	GO:0019901	protein kinase binding	-4.50385	-2.38309	22/747	24211,24242,24642,24672,24949,25416,25595,25650,29431,29542,83427,83529,114562,140694,171026,171373,191575,290356,298848,299850,360678,684352,24686,25152,29219,362245	Atp1a1,Calm1,Pgam1,Ppp2ca,Syn1,Dpysl2,Map2,Atp1b1,Pak1,Pebp1,Rack1,Vdac1,Cdc37,Dnm1,Akap5,Slc12a5,Nme1,Phyhip,Mapre3,Dctn2,Arhgdia,Twf2,Prnp,Map1a,Snca,Map1lc3a
13_Member	GO Molecular Functions	GO:0019901	protein kinase binding	-4.50385	-2.38309	22/747	24211,24242,24642,24672,24949,25416,25595,25650,29431,29542,83427,83529,114562,140694,171026,171373,191575,290356,298848,299850,360678,684352	Atp1a1,Calm1,Pgam1,Ppp2ca,Syn1,Dpysl2,Map2,Atp1b1,Pak1,Pebp1,Rack1,Vdac1,Cdc37,Dnm1,Akap5,Slc12a5,Nme1,Phyhip,Mapre3,Dctn2,Arhgdia,Twf2
13_Member	GO Molecular Functions	GO:0015631	tubulin binding	-2.00219	-0.428932	10/378	24686,25152,25416,25595,29219,29431,140694,191575,298848,362245	Prnp,Map1a,Dpysl2,Map2,Snca,Pak1,Dnm1,Nme1,Mapre3,Map1lc3a
14_Summary	GO Molecular Functions	GO:0008379	thioredoxin peroxidase activity	-4.33774	-2.24047	3/7	94167,113898,117254,24440,25632,24644,29219,29445,29539,63864,64192,81654,94173,289950,298596,298762,300047,301458	Prdx6,Prdx5,Prdx1,Hbb,Hba-a1,Pgk1,Snca,Cox4i1,Aldh2,Hsd17b10,Qdpr,Dlat,Idh3b,Pdhb,Sdhb,Cox7a2l,Cyc1,Ndufs1
14_Member	GO Molecular Functions	GO:0008379	thioredoxin peroxidase activity	-4.33774	-2.24047	3/7	94167,113898,117254	Prdx6,Prdx5,Prdx1
14_Member	GO Molecular Functions	GO:0051920	peroxiredoxin activity	-4.1372	-2.07292	3/8	94167,113898,117254	Prdx6,Prdx5,Prdx1
14_Member	GO Molecular Functions	GO:0004601	peroxidase activity	-3.68245	-1.75744	5/49	24440,25632,94167,113898,117254	Hbb,Hba-a1,Prdx6,Prdx5,Prdx1
14_Member	GO Molecular Functions	GO:0016684	oxidoreductase activity, acting on peroxide as acceptor	-3.52056	-1.62165	5/53	24440,25632,94167,113898,117254	Hbb,Hba-a1,Prdx6,Prdx5,Prdx1
14_Member	GO Molecular Functions	GO:0016491	oxidoreductase activity	-2.76144	-0.992288	18/746	24440,24644,25632,29219,29445,29539,63864,64192,81654,94167,94173,113898,117254,289950,298596,298762,300047,301458	Hbb,Pgk1,Hba-a1,Snca,Cox4i1,Aldh2,Hsd17b10,Qdpr,Dlat,Prdx6,Idh3b,Prdx5,Prdx1,Pdhb,Sdhb,Cox7a2l,Cyc1,Ndufs1
14_Member	GO Molecular Functions	GO:0016209	antioxidant activity	-2.60932	-0.861681	5/84	24440,25632,94167,113898,117254	Hbb,Hba-a1,Prdx6,Prdx5,Prdx1
15_Summary	GO Molecular Functions	GO:0043177	organic acid binding	-4.2183	-2.1433	9/155	24440,24957,25104,25632,25721,29219,29483,29525,79131,360678	Hbb,Glul,Pc,Hba-a1,Got2,Snca,Slc1a3,Pitpna,Fabp3,Arhgdia
15_Member	GO Molecular Functions	GO:0043177	organic acid binding	-4.2183	-2.1433	9/155	24440,24957,25104,25632,25721,29219,29483,29525,79131	Hbb,Glul,Pc,Hba-a1,Got2,Snca,Slc1a3,Pitpna,Fabp3
15_Member	GO Molecular Functions	GO:0036041	long-chain fatty acid binding	-3.08499	-1.25919	3/17	29219,29525,79131	Snca,Pitpna,Fabp3
15_Member	GO Molecular Functions	GO:0031406	carboxylic acid binding	-3.0615	-1.24776	8/178	24957,25104,25721,29219,29483,29525,79131,360678	Glul,Pc,Got2,Snca,Slc1a3,Pitpna,Fabp3,Arhgdia
15_Member	GO Molecular Functions	GO:0033293	monocarboxylic acid binding	-2.54288	-0.815214	5/87	25104,29219,29525,79131,360678	Pc,Snca,Pitpna,Fabp3,Arhgdia
15_Member	GO Molecular Functions	GO:0005504	fatty acid binding	-2.43099	-0.744514	4/57	29219,29525,79131,360678	Snca,Pitpna,Fabp3,Arhgdia
16_Summary	GO Molecular Functions	GO:0043531	ADP binding	-4.05679	-2.00298	5/41	24211,24468,24644,25630,65262	Atp1a1,Hspa8,Pgk1,Pkm,Atp5f1a
16_Member	GO Molecular Functions	GO:0043531	ADP binding	-4.05679	-2.00298	5/41	24211,24468,24644,25630,65262	Atp1a1,Hspa8,Pgk1,Pkm,Atp5f1a
17_Summary	GO Molecular Functions	GO:0035254	glutamate receptor binding	-4.00064	-1.96703	6/67	24242,24686,25152,29144,59114,171026,24672,24213,24468,29693,50664,81664,81757,140694,29271,29753,60334,83427,296966	Calm1,Prnp,Map1a,Canx,Slc9a3r1,Akap5,Ppp2ca,Atp1a3,Hspa8,Atp2a2,Gnao1,Gnai2,Rala,Dnm1,Cfl1,Ywhae,Ensa,Rack1,Chchd3
17_Member	GO Molecular Functions	GO:0035254	glutamate receptor binding	-4.00064	-1.96703	6/67	24242,24686,25152,29144,59114,171026	Calm1,Prnp,Map1a,Canx,Slc9a3r1,Akap5
17_Member	GO Molecular Functions	GO:0031698	beta-2 adrenergic receptor binding	-3.81336	-1.84387	3/10	24672,59114,171026	Ppp2ca,Slc9a3r1,Akap5
17_Member	GO Molecular Functions	GO:0001664	G protein-coupled receptor binding	-3.74587	-1.80121	12/308	24213,24242,24468,24672,24686,29693,50664,59114,81664,81757,140694,171026	Atp1a3,Calm1,Hspa8,Ppp2ca,Prnp,Atp2a2,Gnao1,Slc9a3r1,Gnai2,Rala,Dnm1,Akap5
17_Member	GO Molecular Functions	GO:0035256	G protein-coupled glutamate receptor binding	-3.44688	-1.56221	3/13	24242,24686,59114	Calm1,Prnp,Slc9a3r1
17_Member	GO Molecular Functions	GO:0031690	adrenergic receptor binding	-2.63616	-0.872916	3/24	24672,59114,171026	Ppp2ca,Slc9a3r1,Akap5
17_Member	GO Molecular Functions	GO:0019902	phosphatase binding	-2.32213	-0.674455	8/234	24672,29271,29753,59114,60334,83427,171026,296966	Ppp2ca,Cfl1,Ywhae,Slc9a3r1,Ensa,Rack1,Akap5,Chchd3
18_Summary	GO Molecular Functions	GO:0030276	clathrin binding	-4.00064	-1.96703	6/67	25716,89816,116561,116563,117277,140670,29271,64303,684352	Syt1,Picalm,Cltb,Ap2m1,Epn1,Ap2b1,Cfl1,Pfn1,Twf2
18_Member	GO Molecular Functions	GO:0030276	clathrin binding	-4.00064	-1.96703	6/67	25716,89816,116561,116563,117277,140670	Syt1,Picalm,Cltb,Ap2m1,Epn1,Ap2b1
18_Member	GO Molecular Functions	GO:0050750	low-density lipoprotein particle receptor binding	-2.53449	-0.811671	3/26	25716,89816,116563	Syt1,Picalm,Ap2m1
18_Member	GO Molecular Functions	GO:0070325	lipoprotein particle receptor binding	-2.35509	-0.690867	3/30	25716,89816,116563	Syt1,Picalm,Ap2m1
18_Member	GO Molecular Functions	GO:1902936	phosphatidylinositol bisphosphate binding	-2.06346	-0.479826	5/113	25716,29271,64303,89816,684352	Syt1,Cfl1,Pfn1,Picalm,Twf2
19_Summary	GO Molecular Functions	GO:0048156	tau protein binding	-3.95257	-1.94761	4/23	24672,29219,89816,117028	Ppp2ca,Snca,Picalm,Bin1
19_Member	GO Molecular Functions	GO:0048156	tau protein binding	-3.95257	-1.94761	4/23	24672,29219,89816,117028	Ppp2ca,Snca,Picalm,Bin1
20_Summary	GO Molecular Functions	GO:0051287	NAD binding	-3.92901	-1.93319	6/69	29443,29539,63864,64192,94173,363159	Ahcy,Aldh2,Hsd17b10,Qdpr,Idh3b,Gpd1l
20_Member	GO Molecular Functions	GO:0051287	NAD binding	-3.92901	-1.93319	6/69	29443,29539,63864,64192,94173,363159	Ahcy,Aldh2,Hsd17b10,Qdpr,Idh3b,Gpd1l
Analysis type: GO:BP - Overlap processes - Metascape
GroupID	Category	Term	Description	LogP	Log(q-value)	InTerm_InList	Genes	Symbols
1_Summary	GO Biological Processes	GO:0006091	generation of precursor metabolites and energy	-22.2668	-18.0652	45/453	24191,24333,24334,24642,24644,25017,25058,25630,25739,29445,29483,54322,60416,65152,65262,79250,81654,83688,84027,94173,94271,114766,116550,117273,140608,192241,289950,293991,294362,295922,297990,298596,298762,299201,299739,300047,300677,301011,301458,361596,497902,641434,685322,690163,690441,24468,25650,303179,685232	Aldoc,Eno1,Eno2,Pgam1,Pgk1,Myo5a,Hk1,Pkm,Pygb,Cox4i1,Slc1a3,Cox6c,Pfkp,Pfkm,Atp5f1a,Aco2,Dlat,Taldo1,Gsk3b,Idh3b,Atp5pf,Phb2,Atp5f1c,Rhoa,Atp5me,Atp5po,Pdhb,Ndufb8,Cisd1,Mtch2,Ndufb6,Sdhb,Cox7a2l,Dlst,Ndufa12,Cyc1,Atp5mg,Uqcrc1,Ndufs1,Idh2,Uqcrq,Atp5pd,Uqcr10,Oxct1,Atp5mf,Hspa8,Atp1b1,Guk1,Atp6v1a
1_Member	GO Biological Processes	GO:0006091	generation of precursor metabolites and energy	-22.2668	-18.0652	45/453	24191,24333,24334,24642,24644,25017,25058,25630,25739,29445,29483,54322,60416,65152,65262,79250,81654,83688,84027,94173,94271,114766,116550,117273,140608,192241,289950,293991,294362,295922,297990,298596,298762,299201,299739,300047,300677,301011,301458,361596,497902,641434,685322,690163,690441	Aldoc,Eno1,Eno2,Pgam1,Pgk1,Myo5a,Hk1,Pkm,Pygb,Cox4i1,Slc1a3,Cox6c,Pfkp,Pfkm,Atp5f1a,Aco2,Dlat,Taldo1,Gsk3b,Idh3b,Atp5pf,Phb2,Atp5f1c,Rhoa,Atp5me,Atp5po,Pdhb,Ndufb8,Cisd1,Mtch2,Ndufb6,Sdhb,Cox7a2l,Dlst,Ndufa12,Cyc1,Atp5mg,Uqcrc1,Ndufs1,Idh2,Uqcrq,Atp5pd,Uqcr10,Oxct1,Atp5mf
1_Member	GO Biological Processes	GO:0046034	ATP metabolic process	-19.3686	-15.4681	34/284	24191,24333,24334,24468,24642,24644,25058,25630,25650,29445,54322,60416,65152,65262,94271,116550,117273,140608,192241,293991,295922,297990,298762,299739,300047,300677,301011,301458,303179,497902,641434,685232,685322,690441	Aldoc,Eno1,Eno2,Hspa8,Pgam1,Pgk1,Hk1,Pkm,Atp1b1,Cox4i1,Cox6c,Pfkp,Pfkm,Atp5f1a,Atp5pf,Atp5f1c,Rhoa,Atp5me,Atp5po,Ndufb8,Mtch2,Ndufb6,Cox7a2l,Ndufa12,Cyc1,Atp5mg,Uqcrc1,Ndufs1,Guk1,Uqcrq,Atp5pd,Atp6v1a,Uqcr10,Atp5mf
1_Member	GO Biological Processes	GO:0009060	aerobic respiration	-19.1443	-15.4198	28/179	29445,54322,65262,79250,81654,94173,94271,116550,117273,140608,192241,289950,293991,295922,297990,298596,298762,299201,299739,300047,300677,301011,301458,361596,497902,641434,685322,690441	Cox4i1,Cox6c,Atp5f1a,Aco2,Dlat,Idh3b,Atp5pf,Atp5f1c,Rhoa,Atp5me,Atp5po,Pdhb,Ndufb8,Mtch2,Ndufb6,Sdhb,Cox7a2l,Dlst,Ndufa12,Cyc1,Atp5mg,Uqcrc1,Ndufs1,Idh2,Uqcrq,Atp5pd,Uqcr10,Atp5mf
1_Member	GO Biological Processes	GO:0045333	cellular respiration	-18.3427	-14.7432	30/227	29445,29483,54322,65262,79250,81654,94173,94271,116550,117273,140608,192241,289950,293991,294362,295922,297990,298596,298762,299201,299739,300047,300677,301011,301458,361596,497902,641434,685322,690441	Cox4i1,Slc1a3,Cox6c,Atp5f1a,Aco2,Dlat,Idh3b,Atp5pf,Atp5f1c,Rhoa,Atp5me,Atp5po,Pdhb,Ndufb8,Cisd1,Mtch2,Ndufb6,Sdhb,Cox7a2l,Dlst,Ndufa12,Cyc1,Atp5mg,Uqcrc1,Ndufs1,Idh2,Uqcrq,Atp5pd,Uqcr10,Atp5mf
1_Member	GO Biological Processes	GO:0015980	energy derivation by oxidation of organic compounds	-17.0181	-13.5947	33/315	25739,29445,29483,54322,65152,65262,79250,81654,84027,94173,94271,116550,117273,140608,192241,289950,293991,294362,295922,297990,298596,298762,299201,299739,300047,300677,301011,301458,361596,497902,641434,685322,690441	Pygb,Cox4i1,Slc1a3,Cox6c,Pfkm,Atp5f1a,Aco2,Dlat,Gsk3b,Idh3b,Atp5pf,Atp5f1c,Rhoa,Atp5me,Atp5po,Pdhb,Ndufb8,Cisd1,Mtch2,Ndufb6,Sdhb,Cox7a2l,Dlst,Ndufa12,Cyc1,Atp5mg,Uqcrc1,Ndufs1,Idh2,Uqcrq,Atp5pd,Uqcr10,Atp5mf
1_Member	GO Biological Processes	GO:0006119	oxidative phosphorylation	-14.5449	-11.2464	21/133	29445,54322,65262,94271,116550,117273,140608,192241,293991,295922,297990,298762,299739,300047,300677,301011,301458,497902,641434,685322,690441	Cox4i1,Cox6c,Atp5f1a,Atp5pf,Atp5f1c,Rhoa,Atp5me,Atp5po,Ndufb8,Mtch2,Ndufb6,Cox7a2l,Ndufa12,Cyc1,Atp5mg,Uqcrc1,Ndufs1,Uqcrq,Atp5pd,Uqcr10,Atp5mf
1_Member	GO Biological Processes	GO:0022904	respiratory electron transport chain	-9.09958	-6.6667	14/101	29445,29483,54322,293991,295922,297990,298596,298762,299739,300047,301011,301458,497902,685322	Cox4i1,Slc1a3,Cox6c,Ndufb8,Mtch2,Ndufb6,Sdhb,Cox7a2l,Ndufa12,Cyc1,Uqcrc1,Ndufs1,Uqcrq,Uqcr10
1_Member	GO Biological Processes	GO:0042775	mitochondrial ATP synthesis coupled electron transport	-8.41103	-6.06677	12/78	29445,54322,293991,295922,297990,298762,299739,300047,301011,301458,497902,685322	Cox4i1,Cox6c,Ndufb8,Mtch2,Ndufb6,Cox7a2l,Ndufa12,Cyc1,Uqcrc1,Ndufs1,Uqcrq,Uqcr10
1_Member	GO Biological Processes	GO:0042773	ATP synthesis coupled electron transport	-8.28127	-5.94892	12/80	29445,54322,293991,295922,297990,298762,299739,300047,301011,301458,497902,685322	Cox4i1,Cox6c,Ndufb8,Mtch2,Ndufb6,Cox7a2l,Ndufa12,Cyc1,Uqcrc1,Ndufs1,Uqcrq,Uqcr10
1_Member	GO Biological Processes	GO:0022900	electron transport chain	-7.78133	-5.50402	14/127	29445,29483,54322,293991,295922,297990,298596,298762,299739,300047,301011,301458,497902,685322	Cox4i1,Slc1a3,Cox6c,Ndufb8,Mtch2,Ndufb6,Sdhb,Cox7a2l,Ndufa12,Cyc1,Uqcrc1,Ndufs1,Uqcrq,Uqcr10
1_Member	GO Biological Processes	GO:0019646	aerobic electron transport chain	-6.91046	-4.7217	10/68	29445,54322,293991,297990,298762,300047,301011,301458,497902,685322	Cox4i1,Cox6c,Ndufb8,Ndufb6,Cox7a2l,Cyc1,Uqcrc1,Ndufs1,Uqcrq,Uqcr10
2_Summary	GO Biological Processes	GO:0099003	vesicle-mediated transport in synapse	-17.0527	-13.5947	31/272	24242,24468,24804,24923,24949,25012,25400,25558,25716,29177,29693,29704,79130,81022,83612,84027,89816,116561,116563,116638,116657,116728,116743,117028,140670,140673,140694,171026,259269,361651,499903,24380,24957,29431,29542,58945,117556,24674,25017,29364,29448,29495,64202,79434,81664,81757,83427,317396,29483,25578,361069,502776,60334,65152,94271,363875,690163,171116,296966,312890,83572,29271	Calm1,Hspa8,Syp,Stx1b,Syn1,Snap25,Camk2a,Stxbp1,Syt1,Hpca,Atp2a2,Pacsin1,Dnajc5,Stxbp5,Slc32a1,Gsk3b,Picalm,Cltb,Ap2m1,Slc17a7,Cplx2,Septin5,Sh3gl2,Bin1,Ap2b1,Napa,Dnm1,Akap5,Erc2,Prrt2,Napb,Gad2,Glul,Pak1,Pebp1,Dynll1,Sv2b,Ppp3ca,Myo5a,Cd47,Rab7a,Dlg4,Calr,Rab11b,Gnai2,Rala,Rack1,Ubqln2,Slc1a3,Ywhaz,Dmtn,Scrn1,Ensa,Pfkm,Atp5pf,Rac1,Oxct1,Opa1,Chchd3,Gdap1,Pafah1b1,Cfl1
2_Member	GO Biological Processes	GO:0099003	vesicle-mediated transport in synapse	-17.0527	-13.5947	31/272	24242,24468,24804,24923,24949,25012,25400,25558,25716,29177,29693,29704,79130,81022,83612,84027,89816,116561,116563,116638,116657,116728,116743,117028,140670,140673,140694,171026,259269,361651,499903	Calm1,Hspa8,Syp,Stx1b,Syn1,Snap25,Camk2a,Stxbp1,Syt1,Hpca,Atp2a2,Pacsin1,Dnajc5,Stxbp5,Slc32a1,Gsk3b,Picalm,Cltb,Ap2m1,Slc17a7,Cplx2,Septin5,Sh3gl2,Bin1,Ap2b1,Napa,Dnm1,Akap5,Erc2,Prrt2,Napb
2_Member	GO Biological Processes	GO:0099504	synaptic vesicle cycle	-16.4666	-13.1101	29/244	24242,24468,24804,24923,24949,25012,25400,25558,25716,29693,29704,79130,81022,83612,84027,89816,116561,116563,116638,116657,116728,116743,117028,140670,140673,140694,259269,361651,499903	Calm1,Hspa8,Syp,Stx1b,Syn1,Snap25,Camk2a,Stxbp1,Syt1,Atp2a2,Pacsin1,Dnajc5,Stxbp5,Slc32a1,Gsk3b,Picalm,Cltb,Ap2m1,Slc17a7,Cplx2,Septin5,Sh3gl2,Bin1,Ap2b1,Napa,Dnm1,Erc2,Prrt2,Napb
2_Member	GO Biological Processes	GO:0001505	regulation of neurotransmitter levels	-11.5449	-8.6443	25/276	24242,24380,24804,24923,24949,24957,25012,25400,25558,25716,29431,29542,29693,58945,81022,84027,116561,116638,116657,116728,117556,140673,259269,361651,499903	Calm1,Gad2,Syp,Stx1b,Syn1,Glul,Snap25,Camk2a,Stxbp1,Syt1,Pak1,Pebp1,Atp2a2,Dynll1,Stxbp5,Gsk3b,Cltb,Slc17a7,Cplx2,Septin5,Sv2b,Napa,Erc2,Prrt2,Napb
2_Member	GO Biological Processes	GO:0060627	regulation of vesicle-mediated transport	-10.6336	-7.90915	36/620	24242,24468,24674,24804,24923,24949,25017,25558,25716,29177,29364,29448,29495,29693,29704,64202,79130,79434,81022,81664,81757,83427,84027,89816,116563,116638,116657,116728,116743,117028,140670,140694,171026,317396,361651,499903	Calm1,Hspa8,Ppp3ca,Syp,Stx1b,Syn1,Myo5a,Stxbp1,Syt1,Hpca,Cd47,Rab7a,Dlg4,Atp2a2,Pacsin1,Calr,Dnajc5,Rab11b,Stxbp5,Gnai2,Rala,Rack1,Gsk3b,Picalm,Ap2m1,Slc17a7,Cplx2,Septin5,Sh3gl2,Bin1,Ap2b1,Dnm1,Akap5,Ubqln2,Prrt2,Napb
2_Member	GO Biological Processes	GO:0006836	neurotransmitter transport	-10.3811	-7.7477	23/262	24242,24804,24923,24949,25012,25400,25558,25716,29431,29483,29693,81022,83612,84027,116561,116638,116657,116728,117556,140673,259269,361651,499903	Calm1,Syp,Stx1b,Syn1,Snap25,Camk2a,Stxbp1,Syt1,Pak1,Slc1a3,Atp2a2,Stxbp5,Slc32a1,Gsk3b,Cltb,Slc17a7,Cplx2,Septin5,Sv2b,Napa,Erc2,Prrt2,Napb
2_Member	GO Biological Processes	GO:0140029	exocytic process	-9.65335	-7.15073	14/92	24923,25012,25400,25558,25578,25716,81022,116657,116728,140673,259269,361069,361651,499903	Stx1b,Snap25,Camk2a,Stxbp1,Ywhaz,Syt1,Stxbp5,Cplx2,Septin5,Napa,Erc2,Dmtn,Prrt2,Napb
2_Member	GO Biological Processes	GO:0007269	neurotransmitter secretion	-9.09743	-6.6667	19/204	24242,24804,24923,24949,25012,25400,25558,25716,29431,29693,81022,84027,116561,116657,116728,140673,259269,361651,499903	Calm1,Syp,Stx1b,Syn1,Snap25,Camk2a,Stxbp1,Syt1,Pak1,Atp2a2,Stxbp5,Gsk3b,Cltb,Cplx2,Septin5,Napa,Erc2,Prrt2,Napb
2_Member	GO Biological Processes	GO:0099643	signal release from synapse	-9.09743	-6.6667	19/204	24242,24804,24923,24949,25012,25400,25558,25716,29431,29693,81022,84027,116561,116657,116728,140673,259269,361651,499903	Calm1,Syp,Stx1b,Syn1,Snap25,Camk2a,Stxbp1,Syt1,Pak1,Atp2a2,Stxbp5,Gsk3b,Cltb,Cplx2,Septin5,Napa,Erc2,Prrt2,Napb
2_Member	GO Biological Processes	GO:0006887	exocytosis	-8.54935	-6.18027	26/411	24242,24674,24804,24923,25012,25017,25400,25558,25578,25716,29431,29448,29693,79434,81022,81664,81757,84027,116657,116728,140673,259269,361069,361651,499903,502776	Calm1,Ppp3ca,Syp,Stx1b,Snap25,Myo5a,Camk2a,Stxbp1,Ywhaz,Syt1,Pak1,Rab7a,Atp2a2,Rab11b,Stxbp5,Gnai2,Rala,Gsk3b,Cplx2,Septin5,Napa,Erc2,Dmtn,Prrt2,Napb,Scrn1
2_Member	GO Biological Processes	GO:0016079	synaptic vesicle exocytosis	-8.51701	-6.16052	16/152	24242,24804,24923,25012,25400,25558,25716,29693,81022,84027,116657,116728,140673,259269,361651,499903	Calm1,Syp,Stx1b,Snap25,Camk2a,Stxbp1,Syt1,Atp2a2,Stxbp5,Gsk3b,Cplx2,Septin5,Napa,Erc2,Prrt2,Napb
2_Member	GO Biological Processes	GO:0045055	regulated exocytosis	-8.06489	-5.7664	21/288	24242,24674,24804,24923,25012,25400,25558,25578,25716,29693,79434,81022,81664,84027,116657,116728,140673,259269,361069,361651,499903	Calm1,Ppp3ca,Syp,Stx1b,Snap25,Camk2a,Stxbp1,Ywhaz,Syt1,Atp2a2,Rab11b,Stxbp5,Gnai2,Gsk3b,Cplx2,Septin5,Napa,Erc2,Dmtn,Prrt2,Napb
2_Member	GO Biological Processes	GO:0016082	synaptic vesicle priming	-7.32355	-4.82871	5/24	24923,25012,25558,259269,499903	Stx1b,Snap25,Stxbp1,Erc2,Napb
2_Member	GO Biological Processes	GO:0023061	signal release	-7.223	-5.00819	30/613	24242,24674,24804,24923,24949,24957,25012,25017,25400,25558,25578,25716,29431,29693,58945,60334,65152,79434,81022,84027,94271,116561,116657,116728,140673,259269,361651,363875,499903,690163	Calm1,Ppp3ca,Syp,Stx1b,Syn1,Glul,Snap25,Myo5a,Camk2a,Stxbp1,Ywhaz,Syt1,Pak1,Atp2a2,Dynll1,Ensa,Pfkm,Rab11b,Stxbp5,Gsk3b,Atp5pf,Cltb,Cplx2,Septin5,Napa,Erc2,Prrt2,Rac1,Napb,Oxct1
2_Member	GO Biological Processes	GO:0010807	regulation of synaptic vesicle priming	-6.61703	-4.45684	5/10	24923,25558,81022,140673,499903	Stx1b,Stxbp1,Stxbp5,Napa,Napb
2_Member	GO Biological Processes	GO:0031629	synaptic vesicle fusion to presynaptic active zone membrane	-5.3631	-3.34335	5/22	24923,25012,25716,116657,361651	Stx1b,Snap25,Syt1,Cplx2,Prrt2
2_Member	GO Biological Processes	GO:0099500	vesicle fusion to plasma membrane	-5.26071	-3.26052	5/23	24923,25012,25716,116657,361651	Stx1b,Snap25,Syt1,Cplx2,Prrt2
2_Member	GO Biological Processes	GO:0048499	synaptic vesicle membrane organization	-4.9818	-3.04503	5/26	24923,25012,25716,116657,361651	Stx1b,Snap25,Syt1,Cplx2,Prrt2
2_Member	GO Biological Processes	GO:0022406	membrane docking	-4.85338	-2.98017	9/90	24242,24923,25400,25558,25716,29448,29693,116657,116728	Calm1,Stx1b,Camk2a,Stxbp1,Syt1,Rab7a,Atp2a2,Cplx2,Septin5
2_Member	GO Biological Processes	GO:0048791	calcium ion-regulated exocytosis of neurotransmitter	-4.66656	-2.821	5/22	24923,25012,25558,25716,29693	Stx1b,Snap25,Stxbp1,Syt1,Atp2a2
2_Member	GO Biological Processes	GO:0140056	organelle localization by membrane tethering	-4.37395	-2.57478	8/80	24242,24923,25400,25558,25716,29693,116657,116728	Calm1,Stx1b,Camk2a,Stxbp1,Syt1,Atp2a2,Cplx2,Septin5
2_Member	GO Biological Processes	GO:0046928	regulation of neurotransmitter secretion	-4.1341	-2.37812	10/137	24242,24804,24923,25400,25558,25716,29693,81022,84027,116657	Calm1,Syp,Stx1b,Camk2a,Stxbp1,Syt1,Atp2a2,Stxbp5,Gsk3b,Cplx2
2_Member	GO Biological Processes	GO:0017157	regulation of exocytosis	-4.06386	-2.32467	14/261	24242,24674,24804,24923,25017,25558,25716,29448,29693,81022,81664,81757,84027,116728	Calm1,Ppp3ca,Syp,Stx1b,Myo5a,Stxbp1,Syt1,Rab7a,Atp2a2,Stxbp5,Gnai2,Rala,Gsk3b,Septin5
2_Member	GO Biological Processes	GO:0048284	organelle fusion	-3.95302	-2.23519	10/144	24923,25012,25558,25716,29448,116657,171116,296966,312890,361651	Stx1b,Snap25,Stxbp1,Syt1,Rab7a,Cplx2,Opa1,Chchd3,Gdap1,Prrt2
2_Member	GO Biological Processes	GO:0016050	vesicle organization	-3.80727	-2.1435	12/293	24923,25012,25716,29448,29495,83572,116561,116563,116638,116657,140694,361651	Stx1b,Snap25,Syt1,Rab7a,Dlg4,Pafah1b1,Cltb,Ap2m1,Slc17a7,Cplx2,Dnm1,Prrt2
2_Member	GO Biological Processes	GO:0051588	regulation of neurotransmitter transport	-3.73611	-2.05171	10/153	24242,24804,24923,25400,25558,25716,29693,81022,84027,116657	Calm1,Syp,Stx1b,Camk2a,Stxbp1,Syt1,Atp2a2,Stxbp5,Gsk3b,Cplx2
2_Member	GO Biological Processes	GO:0017156	calcium-ion regulated exocytosis	-3.70317	-2.02403	7/75	24674,24923,25012,25558,25716,29693,81664	Ppp3ca,Stx1b,Snap25,Stxbp1,Syt1,Atp2a2,Gnai2
2_Member	GO Biological Processes	GO:0031630	regulation of synaptic vesicle fusion to presynaptic active zone membrane	-3.63434	-2.0152	3/11	25716,116657,361651	Syt1,Cplx2,Prrt2
2_Member	GO Biological Processes	GO:1901632	regulation of synaptic vesicle membrane organization	-3.63434	-2.0152	3/11	25716,116657,361651	Syt1,Cplx2,Prrt2
2_Member	GO Biological Processes	GO:0048278	vesicle docking	-3.36924	-1.74169	6/61	24923,25400,25558,25716,116657,116728	Stx1b,Camk2a,Stxbp1,Syt1,Cplx2,Septin5
2_Member	GO Biological Processes	GO:0031915	positive regulation of synaptic plasticity	-3.20859	-1.71287	3/15	25012,29271,116657	Snap25,Cfl1,Cplx2
2_Member	GO Biological Processes	GO:0031338	regulation of vesicle fusion	-3.00947	-1.44837	4/28	25558,25716,116657,361651	Stxbp1,Syt1,Cplx2,Prrt2
2_Member	GO Biological Processes	GO:0006906	vesicle fusion	-2.82548	-1.43946	6/107	24923,25012,25716,29448,116657,361651	Stx1b,Snap25,Syt1,Rab7a,Cplx2,Prrt2
2_Member	GO Biological Processes	GO:0090174	organelle membrane fusion	-2.744	-1.38377	6/111	24923,25012,25716,29448,116657,361651	Stx1b,Snap25,Syt1,Rab7a,Cplx2,Prrt2
2_Member	GO Biological Processes	GO:0061025	membrane fusion	-2.62106	-1.28929	7/158	24923,25012,25716,29448,116657,140673,361651	Stx1b,Snap25,Syt1,Rab7a,Cplx2,Napa,Prrt2
2_Member	GO Biological Processes	GO:2000300	regulation of synaptic vesicle exocytosis	-2.37092	-0.910488	6/95	24242,24804,25716,29693,81022,84027	Calm1,Syp,Syt1,Atp2a2,Stxbp5,Gsk3b
3_Summary	GO Biological Processes	GO:1902600	proton transmembrane transport	-13.7687	-10.5214	21/145	24211,24213,25017,25176,54322,59114,65262,85333,94271,114766,116550,116638,140608,192241,245959,291969,299971,300677,641434,685232,690441,25400,25578,29483,50558,65042,83529,83531,84027,171116,171139,252928,266777,295922,312890,24191,24333,24334,24465,24642,24644,25058,25630,29177,60416,65152,81654,117273,191575,289950,290029,299201,303179,24242,24672,24686,25012,25390,25576,25650,29598,29600,296…	Atp1a1,Atp1a3,Myo5a,Slc25a5,Cox6c,Slc9a3r1,Atp5f1a,Slc25a4,Atp5pf,Phb2,Atp5f1c,Slc17a7,Atp5me,Atp5po,Slc25a3,Atp6v0d1,Atp6v1c1,Atp5mg,Atp5pd,Atp6v1a,Atp5mf,Camk2a,Ywhaz,Slc1a3,Npepps,Sfxn3,Vdac1,Vdac2,Gsk3b,Opa1,Timm9,Timm13,Nptx1,Mtch2,Gdap1,Aldoc,Eno1,Eno2,Hprt1,Pgam1,Pgk1,Hk1,Pkm,Hpca,Pfkp,Pfkm,Dlat,Rhoa,Nme1,Pdhb,Pnp,Dlst,Guk1,Calm1,Ppp2ca,Prnp,Snap25,Atp1b3,Ywhah,Atp1b1,Atp2b1,Atp2b4,Atp2a2,…
3_Member	GO Biological Processes	GO:1902600	proton transmembrane transport	-13.7687	-10.5214	21/145	24211,24213,25017,25176,54322,59114,65262,85333,94271,114766,116550,116638,140608,192241,245959,291969,299971,300677,641434,685232,690441	Atp1a1,Atp1a3,Myo5a,Slc25a5,Cox6c,Slc9a3r1,Atp5f1a,Slc25a4,Atp5pf,Phb2,Atp5f1c,Slc17a7,Atp5me,Atp5po,Slc25a3,Atp6v0d1,Atp6v1c1,Atp5mg,Atp5pd,Atp6v1a,Atp5mf
3_Member	GO Biological Processes	GO:0006839	mitochondrial transport	-12.998	-9.79644	25/238	25176,25400,25578,29483,50558,65042,65262,83529,83531,84027,85333,94271,116550,140608,171116,171139,192241,245959,252928,266777,295922,300677,312890,641434,690441	Slc25a5,Camk2a,Ywhaz,Slc1a3,Npepps,Sfxn3,Atp5f1a,Vdac1,Vdac2,Gsk3b,Slc25a4,Atp5pf,Atp5f1c,Atp5me,Opa1,Timm9,Atp5po,Slc25a3,Timm13,Nptx1,Mtch2,Atp5mg,Gdap1,Atp5pd,Atp5mf
3_Member	GO Biological Processes	GO:0006163	purine nucleotide metabolic process	-11.3363	-8.5005	29/384	24191,24333,24334,24465,24642,24644,25058,25630,29177,60416,65152,65262,81654,94271,116550,117273,140608,171116,191575,192241,289950,290029,295922,299201,300677,303179,641434,685232,690441	Aldoc,Eno1,Eno2,Hprt1,Pgam1,Pgk1,Hk1,Pkm,Hpca,Pfkp,Pfkm,Atp5f1a,Dlat,Atp5pf,Atp5f1c,Rhoa,Atp5me,Opa1,Nme1,Atp5po,Pdhb,Pnp,Mtch2,Dlst,Atp5mg,Guk1,Atp5pd,Atp6v1a,Atp5mf
3_Member	GO Biological Processes	GO:0009150	purine ribonucleotide metabolic process	-11.3219	-8.5005	28/358	24191,24333,24334,24465,24642,24644,25058,25630,60416,65152,65262,81654,94271,116550,117273,140608,171116,191575,192241,289950,290029,295922,299201,300677,303179,641434,685232,690441	Aldoc,Eno1,Eno2,Hprt1,Pgam1,Pgk1,Hk1,Pkm,Pfkp,Pfkm,Atp5f1a,Dlat,Atp5pf,Atp5f1c,Rhoa,Atp5me,Opa1,Nme1,Atp5po,Pdhb,Pnp,Mtch2,Dlst,Atp5mg,Guk1,Atp5pd,Atp6v1a,Atp5mf
3_Member	GO Biological Processes	GO:0009259	ribonucleotide metabolic process	-10.7862	-7.99963	28/377	24191,24333,24334,24465,24642,24644,25058,25630,60416,65152,65262,81654,94271,116550,117273,140608,171116,191575,192241,289950,290029,295922,299201,300677,303179,641434,685232,690441	Aldoc,Eno1,Eno2,Hprt1,Pgam1,Pgk1,Hk1,Pkm,Pfkp,Pfkm,Atp5f1a,Dlat,Atp5pf,Atp5f1c,Rhoa,Atp5me,Opa1,Nme1,Atp5po,Pdhb,Pnp,Mtch2,Dlst,Atp5mg,Guk1,Atp5pd,Atp6v1a,Atp5mf
3_Member	GO Biological Processes	GO:0009144	purine nucleoside triphosphate metabolic process	-10.7482	-7.97798	15/92	24333,25630,65262,94271,116550,117273,140608,171116,191575,192241,300677,303179,641434,685232,690441	Eno1,Pkm,Atp5f1a,Atp5pf,Atp5f1c,Rhoa,Atp5me,Opa1,Nme1,Atp5po,Atp5mg,Guk1,Atp5pd,Atp6v1a,Atp5mf
3_Member	GO Biological Processes	GO:0072521	purine-containing compound metabolic process	-10.6412	-7.90915	29/410	24191,24333,24334,24465,24642,24644,25058,25630,29177,60416,65152,65262,81654,94271,116550,117273,140608,171116,191575,192241,289950,290029,295922,299201,300677,303179,641434,685232,690441	Aldoc,Eno1,Eno2,Hprt1,Pgam1,Pgk1,Hk1,Pkm,Hpca,Pfkp,Pfkm,Atp5f1a,Dlat,Atp5pf,Atp5f1c,Rhoa,Atp5me,Opa1,Nme1,Atp5po,Pdhb,Pnp,Mtch2,Dlst,Atp5mg,Guk1,Atp5pd,Atp6v1a,Atp5mf
3_Member	GO Biological Processes	GO:0098662	inorganic cation transmembrane transport	-10.5445	-7.87026	41/790	24211,24213,24242,24672,24686,25012,25017,25176,25390,25576,25650,29177,29483,29598,29600,29693,29753,54322,59114,65262,79125,83529,83629,85333,94271,114766,116550,116638,117028,140608,171116,171373,192241,245959,291969,299971,300677,306439,641434,685232,690441	Atp1a1,Atp1a3,Calm1,Ppp2ca,Prnp,Snap25,Myo5a,Slc25a5,Atp1b3,Ywhah,Atp1b1,Hpca,Slc1a3,Atp2b1,Atp2b4,Atp2a2,Ywhae,Cox6c,Slc9a3r1,Atp5f1a,Anxa6,Vdac1,Slc12a2,Slc25a4,Atp5pf,Phb2,Atp5f1c,Slc17a7,Bin1,Atp5me,Opa1,Slc12a5,Atp5po,Slc25a3,Atp6v0d1,Atp6v1c1,Atp5mg,Gpm6a,Atp5pd,Atp6v1a,Atp5mf
3_Member	GO Biological Processes	GO:1990542	mitochondrial transmembrane transport	-10.5404	-7.87026	15/95	25176,29483,65042,65262,83529,85333,94271,116550,140608,171116,192241,245959,300677,641434,690441	Slc25a5,Slc1a3,Sfxn3,Atp5f1a,Vdac1,Slc25a4,Atp5pf,Atp5f1c,Atp5me,Opa1,Atp5po,Slc25a3,Atp5mg,Atp5pd,Atp5mf
3_Member	GO Biological Processes	GO:0019693	ribose phosphate metabolic process	-10.518	-7.86044	28/387	24191,24333,24334,24465,24642,24644,25058,25630,60416,65152,65262,81654,94271,116550,117273,140608,171116,191575,192241,289950,290029,295922,299201,300677,303179,641434,685232,690441	Aldoc,Eno1,Eno2,Hprt1,Pgam1,Pgk1,Hk1,Pkm,Pfkp,Pfkm,Atp5f1a,Dlat,Atp5pf,Atp5f1c,Rhoa,Atp5me,Opa1,Nme1,Atp5po,Pdhb,Pnp,Mtch2,Dlst,Atp5mg,Guk1,Atp5pd,Atp6v1a,Atp5mf
3_Member	GO Biological Processes	GO:0009205	purine ribonucleoside triphosphate metabolic process	-10.2024	-7.58474	14/84	24333,25630,65262,94271,116550,117273,140608,171116,191575,192241,300677,641434,685232,690441	Eno1,Pkm,Atp5f1a,Atp5pf,Atp5f1c,Rhoa,Atp5me,Opa1,Nme1,Atp5po,Atp5mg,Atp5pd,Atp6v1a,Atp5mf
3_Member	GO Biological Processes	GO:0015985	energy coupled proton transport, down electrochemical gradient	-10.1843	-7.58474	9/24	65262,94271,116550,140608,192241,300677,641434,685232,690441	Atp5f1a,Atp5pf,Atp5f1c,Atp5me,Atp5po,Atp5mg,Atp5pd,Atp6v1a,Atp5mf
3_Member	GO Biological Processes	GO:0015986	ATP synthesis coupled proton transport	-10.1843	-7.58474	9/24	65262,94271,116550,140608,192241,300677,641434,685232,690441	Atp5f1a,Atp5pf,Atp5f1c,Atp5me,Atp5po,Atp5mg,Atp5pd,Atp6v1a,Atp5mf
3_Member	GO Biological Processes	GO:0009117	nucleotide metabolic process	-10.1695	-7.58072	30/458	24191,24333,24334,24465,24642,24644,25058,25630,29177,60416,65152,65262,81654,94271,116550,117273,140608,171116,191575,192241,289950,290029,295922,299201,300677,303179,361596,641434,685232,690441	Aldoc,Eno1,Eno2,Hprt1,Pgam1,Pgk1,Hk1,Pkm,Hpca,Pfkp,Pfkm,Atp5f1a,Dlat,Atp5pf,Atp5f1c,Rhoa,Atp5me,Opa1,Nme1,Atp5po,Pdhb,Pnp,Mtch2,Dlst,Atp5mg,Guk1,Idh2,Atp5pd,Atp6v1a,Atp5mf
3_Member	GO Biological Processes	GO:0006753	nucleoside phosphate metabolic process	-9.98593	-7.4278	30/466	24191,24333,24334,24465,24642,24644,25058,25630,29177,60416,65152,65262,81654,94271,116550,117273,140608,171116,191575,192241,289950,290029,295922,299201,300677,303179,361596,641434,685232,690441	Aldoc,Eno1,Eno2,Hprt1,Pgam1,Pgk1,Hk1,Pkm,Hpca,Pfkp,Pfkm,Atp5f1a,Dlat,Atp5pf,Atp5f1c,Rhoa,Atp5me,Opa1,Nme1,Atp5po,Pdhb,Pnp,Mtch2,Dlst,Atp5mg,Guk1,Idh2,Atp5pd,Atp6v1a,Atp5mf
3_Member	GO Biological Processes	GO:0055086	nucleobase-containing small molecule metabolic process	-9.89148	-7.3431	32/531	24191,24333,24334,24465,24642,24644,25058,25416,25630,29177,60416,65152,65208,65262,81654,94271,116550,117273,140608,171116,191575,192241,289950,290029,295922,299201,300677,303179,361596,641434,685232,690441	Aldoc,Eno1,Eno2,Hprt1,Pgam1,Pgk1,Hk1,Dpysl2,Pkm,Hpca,Pfkp,Pfkm,Dpysl5,Atp5f1a,Dlat,Atp5pf,Atp5f1c,Rhoa,Atp5me,Opa1,Nme1,Atp5po,Pdhb,Pnp,Mtch2,Dlst,Atp5mg,Guk1,Idh2,Atp5pd,Atp6v1a,Atp5mf
3_Member	GO Biological Processes	GO:0042776	mitochondrial ATP synthesis coupled proton transport	-9.82143	-7.29217	8/18	65262,94271,116550,140608,192241,300677,641434,690441	Atp5f1a,Atp5pf,Atp5f1c,Atp5me,Atp5po,Atp5mg,Atp5pd,Atp5mf
3_Member	GO Biological Processes	GO:0009199	ribonucleoside triphosphate metabolic process	-9.71882	-7.20743	14/91	24333,25630,65262,94271,116550,117273,140608,171116,191575,192241,300677,641434,685232,690441	Eno1,Pkm,Atp5f1a,Atp5pf,Atp5f1c,Rhoa,Atp5me,Opa1,Nme1,Atp5po,Atp5mg,Atp5pd,Atp6v1a,Atp5mf
3_Member	GO Biological Processes	GO:0009141	nucleoside triphosphate metabolic process	-9.32819	-6.85899	15/115	24333,25630,65262,94271,116550,117273,140608,171116,191575,192241,300677,303179,641434,685232,690441	Eno1,Pkm,Atp5f1a,Atp5pf,Atp5f1c,Rhoa,Atp5me,Opa1,Nme1,Atp5po,Atp5mg,Guk1,Atp5pd,Atp6v1a,Atp5mf
3_Member	GO Biological Processes	GO:0009206	purine ribonucleoside triphosphate biosynthetic process	-9.04789	-6.62445	12/69	24333,25630,65262,94271,116550,140608,191575,192241,300677,641434,685232,690441	Eno1,Pkm,Atp5f1a,Atp5pf,Atp5f1c,Atp5me,Nme1,Atp5po,Atp5mg,Atp5pd,Atp6v1a,Atp5mf
3_Member	GO Biological Processes	GO:0009145	purine nucleoside triphosphate biosynthetic process	-8.97241	-6.55615	12/70	24333,25630,65262,94271,116550,140608,191575,192241,300677,641434,685232,690441	Eno1,Pkm,Atp5f1a,Atp5pf,Atp5f1c,Atp5me,Nme1,Atp5po,Atp5mg,Atp5pd,Atp6v1a,Atp5mf
3_Member	GO Biological Processes	GO:0072522	purine-containing compound biosynthetic process	-8.95343	-6.54423	18/185	24333,24465,25630,29177,65262,81654,94271,116550,140608,191575,192241,289950,290029,300677,303179,641434,685232,690441	Eno1,Hprt1,Pkm,Hpca,Atp5f1a,Dlat,Atp5pf,Atp5f1c,Atp5me,Nme1,Atp5po,Pdhb,Pnp,Atp5mg,Guk1,Atp5pd,Atp6v1a,Atp5mf
3_Member	GO Biological Processes	GO:0006754	ATP biosynthetic process	-8.6775	-6.28882	11/59	24333,25630,65262,94271,116550,140608,192241,300677,641434,685232,690441	Eno1,Pkm,Atp5f1a,Atp5pf,Atp5f1c,Atp5me,Atp5po,Atp5mg,Atp5pd,Atp6v1a,Atp5mf
3_Member	GO Biological Processes	GO:0009201	ribonucleoside triphosphate biosynthetic process	-8.61322	-6.23118	12/75	24333,25630,65262,94271,116550,140608,191575,192241,300677,641434,685232,690441	Eno1,Pkm,Atp5f1a,Atp5pf,Atp5f1c,Atp5me,Nme1,Atp5po,Atp5mg,Atp5pd,Atp6v1a,Atp5mf
3_Member	GO Biological Processes	GO:0006164	purine nucleotide biosynthetic process	-8.36305	-6.02479	17/178	24333,24465,25630,29177,65262,81654,94271,116550,140608,191575,192241,289950,300677,303179,641434,685232,690441	Eno1,Hprt1,Pkm,Hpca,Atp5f1a,Dlat,Atp5pf,Atp5f1c,Atp5me,Nme1,Atp5po,Pdhb,Atp5mg,Guk1,Atp5pd,Atp6v1a,Atp5mf
3_Member	GO Biological Processes	GO:0009152	purine ribonucleotide biosynthetic process	-8.2316	-5.90507	16/159	24333,24465,25630,65262,81654,94271,116550,140608,191575,192241,289950,300677,303179,641434,685232,690441	Eno1,Hprt1,Pkm,Atp5f1a,Dlat,Atp5pf,Atp5f1c,Atp5me,Nme1,Atp5po,Pdhb,Atp5mg,Guk1,Atp5pd,Atp6v1a,Atp5mf
3_Member	GO Biological Processes	GO:0009165	nucleotide biosynthetic process	-8.19509	-5.87432	19/231	24333,24465,25630,29177,65262,81654,94271,116550,140608,191575,192241,289950,290029,300677,303179,361596,641434,685232,690441	Eno1,Hprt1,Pkm,Hpca,Atp5f1a,Dlat,Atp5pf,Atp5f1c,Atp5me,Nme1,Atp5po,Pdhb,Pnp,Atp5mg,Guk1,Idh2,Atp5pd,Atp6v1a,Atp5mf
3_Member	GO Biological Processes	GO:1901293	nucleoside phosphate biosynthetic process	-8.10298	-5.79902	19/234	24333,24465,25630,29177,65262,81654,94271,116550,140608,191575,192241,289950,290029,300677,303179,361596,641434,685232,690441	Eno1,Hprt1,Pkm,Hpca,Atp5f1a,Dlat,Atp5pf,Atp5f1c,Atp5me,Nme1,Atp5po,Pdhb,Pnp,Atp5mg,Guk1,Idh2,Atp5pd,Atp6v1a,Atp5mf
3_Member	GO Biological Processes	GO:0009142	nucleoside triphosphate biosynthetic process	-7.973	-5.67989	12/85	24333,25630,65262,94271,116550,140608,191575,192241,300677,641434,685232,690441	Eno1,Pkm,Atp5f1a,Atp5pf,Atp5f1c,Atp5me,Nme1,Atp5po,Atp5mg,Atp5pd,Atp6v1a,Atp5mf
3_Member	GO Biological Processes	GO:0009260	ribonucleotide biosynthetic process	-7.70416	-5.44209	16/173	24333,24465,25630,65262,81654,94271,116550,140608,191575,192241,289950,300677,303179,641434,685232,690441	Eno1,Hprt1,Pkm,Atp5f1a,Dlat,Atp5pf,Atp5f1c,Atp5me,Nme1,Atp5po,Pdhb,Atp5mg,Guk1,Atp5pd,Atp6v1a,Atp5mf
3_Member	GO Biological Processes	GO:0046390	ribose phosphate biosynthetic process	-7.4597	-5.22128	16/180	24333,24465,25630,65262,81654,94271,116550,140608,191575,192241,289950,300677,303179,641434,685232,690441	Eno1,Hprt1,Pkm,Atp5f1a,Dlat,Atp5pf,Atp5f1c,Atp5me,Nme1,Atp5po,Pdhb,Atp5mg,Guk1,Atp5pd,Atp6v1a,Atp5mf
3_Member	GO Biological Processes	GO:0090407	organophosphate biosynthetic process	-6.32972	-4.20368	25/496	24264,24333,24465,25104,25630,29177,29593,64473,65262,79131,81654,81677,94271,116550,140608,191575,192241,289950,290029,300677,303179,361596,641434,685232,690441	Ckb,Eno1,Hprt1,Pc,Pkm,Hpca,Ckmt1,Bpnt1,Atp5f1a,Fabp3,Dlat,Itpka,Atp5pf,Atp5f1c,Atp5me,Nme1,Atp5po,Pdhb,Pnp,Atp5mg,Guk1,Idh2,Atp5pd,Atp6v1a,Atp5mf
4_Summary	GO Biological Processes	GO:0072657	protein localization to membrane	-12.8574	-9.69723	39/608	24242,24245,24686,24923,25012,25017,25390,25400,25558,25617,25650,29177,29431,29448,29495,29600,29704,58948,59114,64053,79434,81732,83427,84027,89816,116563,116690,140670,171026,171139,171444,252892,252928,266777,295922,305614,361069,362587,363875,25524,81757,309557,24672,24818,24957,25152,25595,29271,29374,29753,50558,56064,60374,288305,301252	Calm1,Camk2b,Prnp,Stx1b,Snap25,Myo5a,Atp1b3,Camk2a,Stxbp1,Hspa5,Atp1b1,Hpca,Pak1,Rab7a,Dlg4,Atp2b4,Pacsin1,Dlg3,Slc9a3r1,Dlg2,Rab11b,Actr3,Rack1,Gsk3b,Picalm,Ap2m1,Nfasc,Ap2b1,Akap5,Timm9,Pacs1,Lgi1,Timm13,Nptx1,Mtch2,Sptbn1,Dmtn,Macf1,Rac1,Psap,Rala,Epb41l2,Ppp2ca,Tcp1,Glul,Map1a,Map2,Cfl1,Cct4,Ywhae,Npepps,Nptn,Lmna,Cct8,Hsp90ab1
4_Member	GO Biological Processes	GO:0072657	protein localization to membrane	-12.8574	-9.69723	39/608	24242,24245,24686,24923,25012,25017,25390,25400,25558,25617,25650,29177,29431,29448,29495,29600,29704,58948,59114,64053,79434,81732,83427,84027,89816,116563,116690,140670,171026,171139,171444,252892,252928,266777,295922,305614,361069,362587,363875	Calm1,Camk2b,Prnp,Stx1b,Snap25,Myo5a,Atp1b3,Camk2a,Stxbp1,Hspa5,Atp1b1,Hpca,Pak1,Rab7a,Dlg4,Atp2b4,Pacsin1,Dlg3,Slc9a3r1,Dlg2,Rab11b,Actr3,Rack1,Gsk3b,Picalm,Ap2m1,Nfasc,Ap2b1,Akap5,Timm9,Pacs1,Lgi1,Timm13,Nptx1,Mtch2,Sptbn1,Dmtn,Macf1,Rac1
4_Member	GO Biological Processes	GO:0051668	localization within membrane	-12.7075	-9.58512	41/676	24242,24245,24686,24923,25012,25017,25390,25400,25524,25558,25617,25650,29177,29431,29448,29495,29600,29704,58948,59114,64053,79434,81732,81757,83427,84027,89816,116563,116690,140670,171026,171139,171444,252892,252928,266777,295922,305614,361069,362587,363875	Calm1,Camk2b,Prnp,Stx1b,Snap25,Myo5a,Atp1b3,Camk2a,Psap,Stxbp1,Hspa5,Atp1b1,Hpca,Pak1,Rab7a,Dlg4,Atp2b4,Pacsin1,Dlg3,Slc9a3r1,Dlg2,Rab11b,Actr3,Rala,Rack1,Gsk3b,Picalm,Ap2m1,Nfasc,Ap2b1,Akap5,Timm9,Pacs1,Lgi1,Timm13,Nptx1,Mtch2,Sptbn1,Dmtn,Macf1,Rac1
4_Member	GO Biological Processes	GO:1990778	protein localization to cell periphery	-11.591	-8.66819	29/375	24245,24686,24923,25012,25017,25390,25400,25558,25650,29448,29495,29600,29704,59114,64053,81732,83427,84027,89816,116563,116690,171026,171444,252892,266777,305614,309557,362587,363875	Camk2b,Prnp,Stx1b,Snap25,Myo5a,Atp1b3,Camk2a,Stxbp1,Atp1b1,Rab7a,Dlg4,Atp2b4,Pacsin1,Slc9a3r1,Dlg2,Actr3,Rack1,Gsk3b,Picalm,Ap2m1,Nfasc,Akap5,Pacs1,Lgi1,Nptx1,Sptbn1,Epb41l2,Macf1,Rac1
4_Member	GO Biological Processes	GO:1903827	regulation of cellular protein localization	-8.5886	-6.21308	32/599	24245,24672,24686,24818,24957,25017,25152,25400,25595,29177,29271,29374,29431,29495,29600,29753,50558,56064,60374,79434,81732,83427,84027,89816,116563,140670,171026,288305,301252,305614,309557,361069	Camk2b,Ppp2ca,Prnp,Tcp1,Glul,Myo5a,Map1a,Camk2a,Map2,Hpca,Cfl1,Cct4,Pak1,Dlg4,Atp2b4,Ywhae,Npepps,Nptn,Lmna,Rab11b,Actr3,Rack1,Gsk3b,Picalm,Ap2m1,Ap2b1,Akap5,Cct8,Hsp90ab1,Sptbn1,Epb41l2,Dmtn
4_Member	GO Biological Processes	GO:0072659	protein localization to plasma membrane	-7.60474	-5.35255	21/306	24245,24686,25017,25390,25400,25558,25650,29448,29600,29704,59114,81732,83427,89816,116563,116690,171026,171444,305614,362587,363875	Camk2b,Prnp,Myo5a,Atp1b3,Camk2a,Stxbp1,Atp1b1,Rab7a,Atp2b4,Pacsin1,Slc9a3r1,Actr3,Rack1,Picalm,Ap2m1,Nfasc,Akap5,Pacs1,Sptbn1,Macf1,Rac1
4_Member	GO Biological Processes	GO:1903829	positive regulation of cellular protein localization	-7.45908	-5.22128	21/312	24686,24818,25017,25152,29177,29271,29374,29431,29495,29600,50558,56064,81732,83427,84027,140670,171026,288305,301252,305614,309557	Prnp,Tcp1,Myo5a,Map1a,Hpca,Cfl1,Cct4,Pak1,Dlg4,Atp2b4,Npepps,Nptn,Actr3,Rack1,Gsk3b,Ap2b1,Akap5,Cct8,Hsp90ab1,Sptbn1,Epb41l2
4_Member	GO Biological Processes	GO:1905475	regulation of protein localization to membrane	-7.3494	-5.12094	17/208	24245,24686,25017,25400,29177,29431,29495,29600,81732,83427,84027,89816,116563,140670,171026,305614,361069	Camk2b,Prnp,Myo5a,Camk2a,Hpca,Pak1,Dlg4,Atp2b4,Actr3,Rack1,Gsk3b,Picalm,Ap2m1,Ap2b1,Akap5,Sptbn1,Dmtn
4_Member	GO Biological Processes	GO:0090150	establishment of protein localization to membrane	-6.70128	-4.53712	18/258	24242,24686,24923,25012,25617,29177,29431,29448,79434,81732,83427,171026,171139,252928,295922,305614,361069,362587	Calm1,Prnp,Stx1b,Snap25,Hspa5,Hpca,Pak1,Rab7a,Rab11b,Actr3,Rack1,Akap5,Timm9,Timm13,Mtch2,Sptbn1,Dmtn,Macf1
4_Member	GO Biological Processes	GO:1904375	regulation of protein localization to cell periphery	-6.20977	-4.10855	13/145	24245,24686,25017,25400,29600,81732,83427,84027,89816,116563,171026,305614,309557	Camk2b,Prnp,Myo5a,Camk2a,Atp2b4,Actr3,Rack1,Gsk3b,Picalm,Ap2m1,Akap5,Sptbn1,Epb41l2
4_Member	GO Biological Processes	GO:1905477	positive regulation of protein localization to membrane	-5.50686	-3.52799	11/118	24686,25017,29177,29431,29495,29600,81732,83427,140670,171026,305614	Prnp,Myo5a,Hpca,Pak1,Dlg4,Atp2b4,Actr3,Rack1,Ap2b1,Akap5,Sptbn1
4_Member	GO Biological Processes	GO:1903076	regulation of protein localization to plasma membrane	-5.47088	-3.49718	11/119	24245,24686,25017,25400,29600,81732,83427,89816,116563,171026,305614	Camk2b,Prnp,Myo5a,Camk2a,Atp2b4,Actr3,Rack1,Picalm,Ap2m1,Akap5,Sptbn1
4_Member	GO Biological Processes	GO:1904377	positive regulation of protein localization to cell periphery	-4.75523	-2.88915	8/71	24686,25017,29600,81732,83427,171026,305614,309557	Prnp,Myo5a,Atp2b4,Actr3,Rack1,Akap5,Sptbn1,Epb41l2
4_Member	GO Biological Processes	GO:1903078	positive regulation of protein localization to plasma membrane	-4.14258	-2.38443	7/64	24686,25017,29600,81732,83427,171026,305614	Prnp,Myo5a,Atp2b4,Actr3,Rack1,Akap5,Sptbn1
4_Member	GO Biological Processes	GO:0098876	vesicle-mediated transport to the plasma membrane	-2.86799	-1.4696	7/143	24923,25012,29448,79434,83427,171026,305614	Stx1b,Snap25,Rab7a,Rab11b,Rack1,Akap5,Sptbn1
5_Summary	GO Biological Processes	GO:0048812	neuron projection morphogenesis	-12.6125	-9.52485	42/712	24245,24465,24674,25012,25152,25393,25400,25416,25558,25576,25595,25613,25716,29271,29431,29495,29525,29704,56064,60465,65208,79559,81677,81732,83527,83572,84008,84027,89816,114028,116690,116743,117273,171026,171116,252892,266777,301252,306439,316539,362587,363875,24171,24468,24686,24949,25017,25578,58948,58982,60324,64053,64158,64303,79120,259269,171373,29483,59114,361069,683788,24213,24923,1166…	Camk2b,Hprt1,Ppp3ca,Snap25,Map1a,Bcan,Camk2a,Dpysl2,Stxbp1,Ywhah,Map2,Ptprz1,Syt1,Cfl1,Pak1,Dlg4,Pitpna,Pacsin1,Nptn,Cttn,Dpysl5,Alcam,Itpka,Actr3,Dbnl,Pafah1b1,Cntnap1,Gsk3b,Picalm,Ctnnd2,Nfasc,Sh3gl2,Rhoa,Akap5,Opa1,Lgi1,Nptx1,Hsp90ab1,Gpm6a,Epha4,Macf1,Rac1,Add2,Hspa8,Prnp,Syn1,Myo5a,Ywhaz,Dlg3,Ncan,Synpo,Dlg2,Tuba1a,Pfn1,Arf4,Erc2,Slc12a5,Slc1a3,Slc9a3r1,Dmtn,Fscn1,Atp1a3,Stx1b,Slc17a7,Hspa5,…
5_Member	GO Biological Processes	GO:0048812	neuron projection morphogenesis	-12.6125	-9.52485	42/712	24245,24465,24674,25012,25152,25393,25400,25416,25558,25576,25595,25613,25716,29271,29431,29495,29525,29704,56064,60465,65208,79559,81677,81732,83527,83572,84008,84027,89816,114028,116690,116743,117273,171026,171116,252892,266777,301252,306439,316539,362587,363875	Camk2b,Hprt1,Ppp3ca,Snap25,Map1a,Bcan,Camk2a,Dpysl2,Stxbp1,Ywhah,Map2,Ptprz1,Syt1,Cfl1,Pak1,Dlg4,Pitpna,Pacsin1,Nptn,Cttn,Dpysl5,Alcam,Itpka,Actr3,Dbnl,Pafah1b1,Cntnap1,Gsk3b,Picalm,Ctnnd2,Nfasc,Sh3gl2,Rhoa,Akap5,Opa1,Lgi1,Nptx1,Hsp90ab1,Gpm6a,Epha4,Macf1,Rac1
5_Member	GO Biological Processes	GO:0050808	synapse organization	-12.4484	-9.42292	35/508	24171,24245,24468,24686,24949,25012,25017,25393,25578,29271,29431,29495,56064,58948,58982,60324,60465,64053,64158,64303,79120,81677,81732,83527,83572,84027,89816,114028,116690,117273,171116,259269,266777,306439,316539	Add2,Camk2b,Hspa8,Prnp,Syn1,Snap25,Myo5a,Bcan,Ywhaz,Cfl1,Pak1,Dlg4,Nptn,Dlg3,Ncan,Synpo,Cttn,Dlg2,Tuba1a,Pfn1,Arf4,Itpka,Actr3,Dbnl,Pafah1b1,Gsk3b,Picalm,Ctnnd2,Nfasc,Rhoa,Opa1,Erc2,Nptx1,Gpm6a,Epha4
5_Member	GO Biological Processes	GO:0120039	plasma membrane bounded cell projection morphogenesis	-12.272	-9.27452	42/729	24245,24465,24674,25012,25152,25393,25400,25416,25558,25576,25595,25613,25716,29271,29431,29495,29525,29704,56064,60465,65208,79559,81677,81732,83527,83572,84008,84027,89816,114028,116690,116743,117273,171026,171116,252892,266777,301252,306439,316539,362587,363875	Camk2b,Hprt1,Ppp3ca,Snap25,Map1a,Bcan,Camk2a,Dpysl2,Stxbp1,Ywhah,Map2,Ptprz1,Syt1,Cfl1,Pak1,Dlg4,Pitpna,Pacsin1,Nptn,Cttn,Dpysl5,Alcam,Itpka,Actr3,Dbnl,Pafah1b1,Cntnap1,Gsk3b,Picalm,Ctnnd2,Nfasc,Sh3gl2,Rhoa,Akap5,Opa1,Lgi1,Nptx1,Hsp90ab1,Gpm6a,Epha4,Macf1,Rac1
5_Member	GO Biological Processes	GO:0048858	cell projection morphogenesis	-12.1934	-9.22229	42/733	24245,24465,24674,25012,25152,25393,25400,25416,25558,25576,25595,25613,25716,29271,29431,29495,29525,29704,56064,60465,65208,79559,81677,81732,83527,83572,84008,84027,89816,114028,116690,116743,117273,171026,171116,252892,266777,301252,306439,316539,362587,363875	Camk2b,Hprt1,Ppp3ca,Snap25,Map1a,Bcan,Camk2a,Dpysl2,Stxbp1,Ywhah,Map2,Ptprz1,Syt1,Cfl1,Pak1,Dlg4,Pitpna,Pacsin1,Nptn,Cttn,Dpysl5,Alcam,Itpka,Actr3,Dbnl,Pafah1b1,Cntnap1,Gsk3b,Picalm,Ctnnd2,Nfasc,Sh3gl2,Rhoa,Akap5,Opa1,Lgi1,Nptx1,Hsp90ab1,Gpm6a,Epha4,Macf1,Rac1
5_Member	GO Biological Processes	GO:0032990	cell part morphogenesis	-11.7528	-8.80645	42/756	24245,24465,24674,25012,25152,25393,25400,25416,25558,25576,25595,25613,25716,29271,29431,29495,29525,29704,56064,60465,65208,79559,81677,81732,83527,83572,84008,84027,89816,114028,116690,116743,117273,171026,171116,252892,266777,301252,306439,316539,362587,363875	Camk2b,Hprt1,Ppp3ca,Snap25,Map1a,Bcan,Camk2a,Dpysl2,Stxbp1,Ywhah,Map2,Ptprz1,Syt1,Cfl1,Pak1,Dlg4,Pitpna,Pacsin1,Nptn,Cttn,Dpysl5,Alcam,Itpka,Actr3,Dbnl,Pafah1b1,Cntnap1,Gsk3b,Picalm,Ctnnd2,Nfasc,Sh3gl2,Rhoa,Akap5,Opa1,Lgi1,Nptx1,Hsp90ab1,Gpm6a,Epha4,Macf1,Rac1
5_Member	GO Biological Processes	GO:0016358	dendrite development	-10.8824	-8.07871	26/321	24245,24465,24674,25152,25400,25576,25595,25613,29271,29431,29495,29704,79120,81677,81732,83527,83572,84027,89816,114028,117273,171026,171116,171373,316539,363875	Camk2b,Hprt1,Ppp3ca,Map1a,Camk2a,Ywhah,Map2,Ptprz1,Cfl1,Pak1,Dlg4,Pacsin1,Arf4,Itpka,Actr3,Dbnl,Pafah1b1,Gsk3b,Picalm,Ctnnd2,Rhoa,Akap5,Opa1,Slc12a5,Epha4,Rac1
5_Member	GO Biological Processes	GO:0048667	cell morphogenesis involved in neuron differentiation	-10.5578	-7.87026	37/656	24245,24465,24674,25012,25152,25400,25416,25558,25576,25595,25613,29271,29431,29483,29495,29525,56064,59114,60465,65208,79559,81677,81732,83527,83572,84027,89816,114028,116690,171026,171116,252892,266777,301252,316539,362587,363875	Camk2b,Hprt1,Ppp3ca,Snap25,Map1a,Camk2a,Dpysl2,Stxbp1,Ywhah,Map2,Ptprz1,Cfl1,Pak1,Slc1a3,Dlg4,Pitpna,Nptn,Slc9a3r1,Cttn,Dpysl5,Alcam,Itpka,Actr3,Dbnl,Pafah1b1,Gsk3b,Picalm,Ctnnd2,Nfasc,Akap5,Opa1,Lgi1,Nptx1,Hsp90ab1,Epha4,Macf1,Rac1
5_Member	GO Biological Processes	GO:0048813	dendrite morphogenesis	-10.469	-7.82368	20/191	24245,24465,24674,25400,25576,25595,25613,29271,29495,81677,81732,83527,83572,84027,89816,114028,171026,171116,316539,363875	Camk2b,Hprt1,Ppp3ca,Camk2a,Ywhah,Map2,Ptprz1,Cfl1,Dlg4,Itpka,Actr3,Dbnl,Pafah1b1,Gsk3b,Picalm,Ctnnd2,Akap5,Opa1,Epha4,Rac1
5_Member	GO Biological Processes	GO:0034330	cell junction organization	-10.0336	-7.46549	40/786	24171,24245,24468,24686,24949,25012,25017,25393,25578,29271,29431,29495,56064,58948,58982,60324,60465,64053,64158,64303,79120,81677,81732,83527,83572,84008,84027,89816,114028,116690,117273,171116,259269,266777,306439,316539,361069,362587,363875,683788	Add2,Camk2b,Hspa8,Prnp,Syn1,Snap25,Myo5a,Bcan,Ywhaz,Cfl1,Pak1,Dlg4,Nptn,Dlg3,Ncan,Synpo,Cttn,Dlg2,Tuba1a,Pfn1,Arf4,Itpka,Actr3,Dbnl,Pafah1b1,Cntnap1,Gsk3b,Picalm,Ctnnd2,Nfasc,Rhoa,Opa1,Erc2,Nptx1,Gpm6a,Epha4,Dmtn,Macf1,Rac1,Fscn1
5_Member	GO Biological Processes	GO:0106027	neuron projection organization	-9.60636	-7.11234	15/110	24213,24245,24686,25152,29271,29495,60465,81677,81732,83527,83572,84027,114028,171116,316539	Atp1a3,Camk2b,Prnp,Map1a,Cfl1,Dlg4,Cttn,Itpka,Actr3,Dbnl,Pafah1b1,Gsk3b,Ctnnd2,Opa1,Epha4
5_Member	GO Biological Processes	GO:0050803	regulation of synapse structure or activity	-9.23799	-6.77899	22/273	24245,24468,24686,24923,25012,25578,29271,58982,64158,79120,81677,81732,83527,83572,84027,89816,116638,117273,171116,266777,306439,316539	Camk2b,Hspa8,Prnp,Stx1b,Snap25,Ywhaz,Cfl1,Ncan,Tuba1a,Arf4,Itpka,Actr3,Dbnl,Pafah1b1,Gsk3b,Picalm,Slc17a7,Rhoa,Opa1,Nptx1,Gpm6a,Epha4
5_Member	GO Biological Processes	GO:0031344	regulation of cell projection organization	-8.74623	-6.34398	38/797	24245,24674,24686,24923,25012,25416,25576,25595,25613,25617,29271,29431,29495,29704,50864,56064,58945,60465,64303,81677,81732,81757,83527,83532,83572,84027,89816,117273,171026,171116,191575,306439,316539,360739,361069,362587,363875,683788	Camk2b,Ppp3ca,Prnp,Stx1b,Snap25,Dpysl2,Ywhah,Map2,Ptprz1,Hspa5,Cfl1,Pak1,Dlg4,Pacsin1,Ntm,Nptn,Dynll1,Cttn,Pfn1,Itpka,Actr3,Rala,Dbnl,Vdac3,Pafah1b1,Gsk3b,Picalm,Rhoa,Akap5,Opa1,Nme1,Gpm6a,Epha4,Ranbp1,Dmtn,Macf1,Rac1,Fscn1
5_Member	GO Biological Processes	GO:0060996	dendritic spine development	-8.5266	-6.16386	15/131	24245,25400,29271,29431,29495,79120,81677,81732,83527,83572,114028,171116,171373,316539,363875	Camk2b,Camk2a,Cfl1,Pak1,Dlg4,Arf4,Itpka,Actr3,Dbnl,Pafah1b1,Ctnnd2,Opa1,Slc12a5,Epha4,Rac1
5_Member	GO Biological Processes	GO:0050807	regulation of synapse organization	-7.95806	-5.67029	20/265	24245,24468,24686,25012,25578,29271,58982,64158,79120,81677,81732,83527,83572,84027,89816,117273,171116,266777,306439,316539	Camk2b,Hspa8,Prnp,Snap25,Ywhaz,Cfl1,Ncan,Tuba1a,Arf4,Itpka,Actr3,Dbnl,Pafah1b1,Gsk3b,Picalm,Rhoa,Opa1,Nptx1,Gpm6a,Epha4
5_Member	GO Biological Processes	GO:0120035	regulation of plasma membrane bounded cell projection organization	-7.93281	-5.6503	36/780	24245,24674,24686,24923,25012,25416,25576,25595,25613,25617,29271,29431,29704,50864,56064,58945,64303,81677,81732,81757,83527,83532,83572,84027,89816,117273,171026,171116,191575,306439,316539,360739,361069,362587,363875,683788	Camk2b,Ppp3ca,Prnp,Stx1b,Snap25,Dpysl2,Ywhah,Map2,Ptprz1,Hspa5,Cfl1,Pak1,Pacsin1,Ntm,Nptn,Dynll1,Pfn1,Itpka,Actr3,Rala,Dbnl,Vdac3,Pafah1b1,Gsk3b,Picalm,Rhoa,Akap5,Opa1,Nme1,Gpm6a,Epha4,Ranbp1,Dmtn,Macf1,Rac1,Fscn1
5_Member	GO Biological Processes	GO:0031346	positive regulation of cell projection organization	-7.73726	-5.46509	26/450	24245,25613,25617,29271,29431,29495,29704,56064,58945,64303,81677,81732,81757,83527,83572,84027,89816,171026,171116,191575,306439,316539,360739,362587,363875,683788	Camk2b,Ptprz1,Hspa5,Cfl1,Pak1,Dlg4,Pacsin1,Nptn,Dynll1,Pfn1,Itpka,Actr3,Rala,Dbnl,Pafah1b1,Gsk3b,Picalm,Akap5,Opa1,Nme1,Gpm6a,Epha4,Ranbp1,Macf1,Rac1,Fscn1
5_Member	GO Biological Processes	GO:0051129	negative regulation of cellular component organization	-7.62041	-5.3633	34/729	24171,24468,24674,24686,24851,24923,25152,25176,25558,25576,25595,25613,25617,29271,29495,29704,50864,60374,64303,81732,83527,83531,83572,84027,89816,117273,117280,171116,305614,316539,317396,361069,361651,493810	Add2,Hspa8,Ppp3ca,Prnp,Tpm1,Stx1b,Map1a,Slc25a5,Stxbp1,Ywhah,Map2,Ptprz1,Hspa5,Cfl1,Dlg4,Pacsin1,Ntm,Lmna,Pfn1,Actr3,Dbnl,Vdac2,Pafah1b1,Gsk3b,Picalm,Rhoa,Hnrnpu,Opa1,Sptbn1,Epha4,Ubqln2,Dmtn,Prrt2,Capza2
5_Member	GO Biological Processes	GO:0048814	regulation of dendrite morphogenesis	-7.36453	-5.13143	12/96	24245,24674,25576,25613,81677,81732,83527,83572,84027,171026,171116,316539	Camk2b,Ppp3ca,Ywhah,Ptprz1,Itpka,Actr3,Dbnl,Pafah1b1,Gsk3b,Akap5,Opa1,Epha4
5_Member	GO Biological Processes	GO:0097061	dendritic spine organization	-7.06663	-4.86936	12/102	24245,24686,29271,29495,60465,81677,81732,83527,83572,114028,171116,316539	Camk2b,Prnp,Cfl1,Dlg4,Cttn,Itpka,Actr3,Dbnl,Pafah1b1,Ctnnd2,Opa1,Epha4
5_Member	GO Biological Processes	GO:0099173	postsynapse organization	-7.02247	-4.82948	17/219	24245,24468,24686,29271,29495,58948,60465,64053,79120,81677,81732,83527,83572,114028,171116,266777,316539	Camk2b,Hspa8,Prnp,Cfl1,Dlg4,Dlg3,Cttn,Dlg2,Arf4,Itpka,Actr3,Dbnl,Pafah1b1,Ctnnd2,Opa1,Nptx1,Epha4
5_Member	GO Biological Processes	GO:0099175	regulation of postsynapse organization	-6.57139	-4.41902	12/113	24245,24468,24686,29271,79120,81677,81732,83527,83572,171116,266777,316539	Camk2b,Hspa8,Prnp,Cfl1,Arf4,Itpka,Actr3,Dbnl,Pafah1b1,Opa1,Nptx1,Epha4
5_Member	GO Biological Processes	GO:0060997	dendritic spine morphogenesis	-6.55437	-4.40586	10/74	24245,29271,29495,81677,81732,83527,83572,114028,171116,316539	Camk2b,Cfl1,Dlg4,Itpka,Actr3,Dbnl,Pafah1b1,Ctnnd2,Opa1,Epha4
5_Member	GO Biological Processes	GO:0010975	regulation of neuron projection development	-6.34095	-4.21124	27/565	24245,24674,24923,25012,25416,25576,25595,25613,25617,29271,29431,29704,50864,56064,81677,81732,83527,83572,84027,89816,117273,171026,171116,191575,316539,360739,362587	Camk2b,Ppp3ca,Stx1b,Snap25,Dpysl2,Ywhah,Map2,Ptprz1,Hspa5,Cfl1,Pak1,Pacsin1,Ntm,Nptn,Itpka,Actr3,Dbnl,Pafah1b1,Gsk3b,Picalm,Rhoa,Akap5,Opa1,Nme1,Epha4,Ranbp1,Macf1
5_Member	GO Biological Processes	GO:0007409	axonogenesis	-5.9548	-3.88032	24/485	25012,25152,25416,25558,25595,25613,29431,29525,56064,60465,65208,79559,81732,83527,83572,84027,89816,116690,252892,266777,301252,316539,362587,363875	Snap25,Map1a,Dpysl2,Stxbp1,Map2,Ptprz1,Pak1,Pitpna,Nptn,Cttn,Dpysl5,Alcam,Actr3,Dbnl,Pafah1b1,Gsk3b,Picalm,Nfasc,Lgi1,Nptx1,Hsp90ab1,Epha4,Macf1,Rac1
5_Member	GO Biological Processes	GO:0061001	regulation of dendritic spine morphogenesis	-5.47982	-3.50354	8/57	24245,29271,81677,81732,83527,83572,171116,316539	Camk2b,Cfl1,Itpka,Actr3,Dbnl,Pafah1b1,Opa1,Epha4
5_Member	GO Biological Processes	GO:0061003	positive regulation of dendritic spine morphogenesis	-5.34536	-3.39905	6/28	24245,81677,81732,83527,83572,171116	Camk2b,Itpka,Actr3,Dbnl,Pafah1b1,Opa1
5_Member	GO Biological Processes	GO:0061564	axon development	-5.16599	-3.25276	24/539	25012,25152,25416,25558,25595,25613,29431,29525,56064,60465,65208,79559,81732,83527,83572,84027,89816,116690,252892,266777,301252,316539,362587,363875	Snap25,Map1a,Dpysl2,Stxbp1,Map2,Ptprz1,Pak1,Pitpna,Nptn,Cttn,Dpysl5,Alcam,Actr3,Dbnl,Pafah1b1,Gsk3b,Picalm,Nfasc,Lgi1,Nptx1,Hsp90ab1,Epha4,Macf1,Rac1
5_Member	GO Biological Processes	GO:0060999	positive regulation of dendritic spine development	-5.04301	-3.15105	8/65	24245,29271,81677,81732,83527,83572,171116,363875	Camk2b,Cfl1,Itpka,Actr3,Dbnl,Pafah1b1,Opa1,Rac1
5_Member	GO Biological Processes	GO:0031345	negative regulation of cell projection organization	-4.23607	-2.45609	13/220	24674,24686,24923,25576,25595,25613,29271,50864,81732,83572,84027,117273,316539	Ppp3ca,Prnp,Stx1b,Ywhah,Map2,Ptprz1,Cfl1,Ntm,Actr3,Pafah1b1,Gsk3b,Rhoa,Epha4
5_Member	GO Biological Processes	GO:0060998	regulation of dendritic spine development	-4.18378	-2.41516	8/85	24245,29271,81677,81732,83527,83572,171116,363875	Camk2b,Cfl1,Itpka,Actr3,Dbnl,Pafah1b1,Opa1,Rac1
5_Member	GO Biological Processes	GO:0010976	positive regulation of neuron projection development	-3.50358	-1.85322	12/227	24245,25613,25617,29704,56064,81677,81732,83527,83572,171116,191575,360739	Camk2b,Ptprz1,Hspa5,Pacsin1,Nptn,Itpka,Actr3,Dbnl,Pafah1b1,Opa1,Nme1,Ranbp1
6_Summary	GO Biological Processes	GO:0061024	membrane organization	-12.5318	-9.47632	43/748	24242,24468,24923,25012,25176,25400,25524,25558,25716,29448,29495,29525,29693,29704,59114,60374,64053,79125,83531,83572,84027,85333,89816,116561,116563,116657,116690,116743,117028,117273,117277,140673,140694,171026,171116,171139,252928,295922,296966,305614,312444,361651,363875,25017,25578	Calm1,Hspa8,Stx1b,Snap25,Slc25a5,Camk2a,Psap,Stxbp1,Syt1,Rab7a,Dlg4,Pitpna,Atp2a2,Pacsin1,Slc9a3r1,Lmna,Dlg2,Anxa6,Vdac2,Pafah1b1,Gsk3b,Slc25a4,Picalm,Cltb,Ap2m1,Cplx2,Nfasc,Sh3gl2,Bin1,Rhoa,Epn1,Napa,Dnm1,Akap5,Opa1,Timm9,Timm13,Mtch2,Chchd3,Sptbn1,Immt,Prrt2,Rac1,Myo5a,Ywhaz
6_Member	GO Biological Processes	GO:0061024	membrane organization	-12.5318	-9.47632	43/748	24242,24468,24923,25012,25176,25400,25524,25558,25716,29448,29495,29525,29693,29704,59114,60374,64053,79125,83531,83572,84027,85333,89816,116561,116563,116657,116690,116743,117028,117273,117277,140673,140694,171026,171116,171139,252928,295922,296966,305614,312444,361651,363875	Calm1,Hspa8,Stx1b,Snap25,Slc25a5,Camk2a,Psap,Stxbp1,Syt1,Rab7a,Dlg4,Pitpna,Atp2a2,Pacsin1,Slc9a3r1,Lmna,Dlg2,Anxa6,Vdac2,Pafah1b1,Gsk3b,Slc25a4,Picalm,Cltb,Ap2m1,Cplx2,Nfasc,Sh3gl2,Bin1,Rhoa,Epn1,Napa,Dnm1,Akap5,Opa1,Timm9,Timm13,Mtch2,Chchd3,Sptbn1,Immt,Prrt2,Rac1
6_Member	GO Biological Processes	GO:0010256	endomembrane system organization	-2.95578	-1.39764	18/495	24923,25012,25017,25524,25578,25716,29693,29704,59114,60374,79125,83572,116657,116743,117028,140694,305614,361651	Stx1b,Snap25,Myo5a,Psap,Ywhaz,Syt1,Atp2a2,Pacsin1,Slc9a3r1,Lmna,Anxa6,Pafah1b1,Cplx2,Sh3gl2,Bin1,Dnm1,Sptbn1,Prrt2
7_Summary	GO Biological Processes	GO:0050804	modulation of chemical synaptic transmission	-11.3829	-8.50354	38/646	24242,24245,24674,24686,24804,24923,24957,25012,25017,25152,25393,25400,25558,25716,29271,29431,29483,29495,29693,56010,56064,60324,81022,81664,81677,83629,84027,114028,116657,140694,171026,252892,259269,266777,316539,361651,363875,500446	Calm1,Camk2b,Ppp3ca,Prnp,Syp,Stx1b,Glul,Snap25,Myo5a,Map1a,Bcan,Camk2a,Stxbp1,Syt1,Cfl1,Pak1,Slc1a3,Dlg4,Atp2a2,Ywhag,Nptn,Synpo,Stxbp5,Gnai2,Itpka,Slc12a2,Gsk3b,Ctnnd2,Cplx2,Dnm1,Akap5,Lgi1,Erc2,Nptx1,Epha4,Prrt2,Rac1,Phf24
7_Member	GO Biological Processes	GO:0050804	modulation of chemical synaptic transmission	-11.3829	-8.50354	38/646	24242,24245,24674,24686,24804,24923,24957,25012,25017,25152,25393,25400,25558,25716,29271,29431,29483,29495,29693,56010,56064,60324,81022,81664,81677,83629,84027,114028,116657,140694,171026,252892,259269,266777,316539,361651,363875,500446	Calm1,Camk2b,Ppp3ca,Prnp,Syp,Stx1b,Glul,Snap25,Myo5a,Map1a,Bcan,Camk2a,Stxbp1,Syt1,Cfl1,Pak1,Slc1a3,Dlg4,Atp2a2,Ywhag,Nptn,Synpo,Stxbp5,Gnai2,Itpka,Slc12a2,Gsk3b,Ctnnd2,Cplx2,Dnm1,Akap5,Lgi1,Erc2,Nptx1,Epha4,Prrt2,Rac1,Phf24
7_Member	GO Biological Processes	GO:0099177	regulation of trans-synaptic signaling	-11.3627	-8.50354	38/647	24242,24245,24674,24686,24804,24923,24957,25012,25017,25152,25393,25400,25558,25716,29271,29431,29483,29495,29693,56010,56064,60324,81022,81664,81677,83629,84027,114028,116657,140694,171026,252892,259269,266777,316539,361651,363875,500446	Calm1,Camk2b,Ppp3ca,Prnp,Syp,Stx1b,Glul,Snap25,Myo5a,Map1a,Bcan,Camk2a,Stxbp1,Syt1,Cfl1,Pak1,Slc1a3,Dlg4,Atp2a2,Ywhag,Nptn,Synpo,Stxbp5,Gnai2,Itpka,Slc12a2,Gsk3b,Ctnnd2,Cplx2,Dnm1,Akap5,Lgi1,Erc2,Nptx1,Epha4,Prrt2,Rac1,Phf24
7_Member	GO Biological Processes	GO:0048167	regulation of synaptic plasticity	-8.13827	-5.82877	23/341	24245,24686,24804,25012,25152,25393,25400,25558,29271,29431,29495,56010,56064,60324,81677,84027,114028,116657,171026,259269,316539,361651,363875	Camk2b,Prnp,Syp,Snap25,Map1a,Bcan,Camk2a,Stxbp1,Cfl1,Pak1,Dlg4,Ywhag,Nptn,Synpo,Itpka,Gsk3b,Ctnnd2,Cplx2,Akap5,Erc2,Epha4,Prrt2,Rac1
7_Member	GO Biological Processes	GO:0048168	regulation of neuronal synaptic plasticity	-5.27638	-3.33961	9/80	24245,24804,25393,25400,29495,56064,60324,84027,363875	Camk2b,Syp,Bcan,Camk2a,Dlg4,Nptn,Synpo,Gsk3b,Rac1
7_Member	GO Biological Processes	GO:0050806	positive regulation of synaptic transmission	-4.10262	-2.3574	15/292	24245,24686,24923,24957,25012,25558,25716,29431,29483,29495,56064,84027,171026,252892,316539	Camk2b,Prnp,Stx1b,Glul,Snap25,Stxbp1,Syt1,Pak1,Slc1a3,Dlg4,Nptn,Gsk3b,Akap5,Lgi1,Epha4
7_Member	GO Biological Processes	GO:0048169	regulation of long-term neuronal synaptic plasticity	-3.53308	-1.87804	5/37	24245,24804,29495,56064,60324	Camk2b,Syp,Dlg4,Nptn,Synpo
8_Summary	GO Biological Processes	GO:0007005	mitochondrion organization	-10.7187	-7.96426	33/523	24242,25176,25400,25578,29539,50558,60374,60465,63864,81757,83529,83531,84027,85333,114562,114766,171116,171139,252928,266777,288088,293991,294964,295922,296966,297990,298762,299739,301458,312444,312890,315167,362245,24468	Calm1,Slc25a5,Camk2a,Ywhaz,Aldh2,Npepps,Lmna,Cttn,Hsd17b10,Rala,Vdac1,Vdac2,Gsk3b,Slc25a4,Cdc37,Phb2,Opa1,Timm9,Timm13,Nptx1,Ndufb4,Ndufb8,Ndufb5,Mtch2,Chchd3,Ndufb6,Cox7a2l,Ndufa12,Ndufs1,Immt,Gdap1,Ndufa6,Map1lc3a,Hspa8
8_Member	GO Biological Processes	GO:0007005	mitochondrion organization	-10.7187	-7.96426	33/523	24242,25176,25400,25578,29539,50558,60374,60465,63864,81757,83529,83531,84027,85333,114562,114766,171116,171139,252928,266777,288088,293991,294964,295922,296966,297990,298762,299739,301458,312444,312890,315167,362245	Calm1,Slc25a5,Camk2a,Ywhaz,Aldh2,Npepps,Lmna,Cttn,Hsd17b10,Rala,Vdac1,Vdac2,Gsk3b,Slc25a4,Cdc37,Phb2,Opa1,Timm9,Timm13,Nptx1,Ndufb4,Ndufb8,Ndufb5,Mtch2,Chchd3,Ndufb6,Cox7a2l,Ndufa12,Ndufs1,Immt,Gdap1,Ndufa6,Map1lc3a
8_Member	GO Biological Processes	GO:0007006	mitochondrial membrane organization	-6.83395	-4.65355	12/107	24242,25176,25400,83531,84027,85333,171116,171139,252928,295922,296966,312444	Calm1,Slc25a5,Camk2a,Vdac2,Gsk3b,Slc25a4,Opa1,Timm9,Timm13,Mtch2,Chchd3,Immt
8_Member	GO Biological Processes	GO:0008637	apoptotic mitochondrial changes	-5.61708	-3.61961	11/115	25176,25400,29539,60374,83531,84027,85333,171116,266777,295922,301458	Slc25a5,Camk2a,Aldh2,Lmna,Vdac2,Gsk3b,Slc25a4,Opa1,Nptx1,Mtch2,Ndufs1
8_Member	GO Biological Processes	GO:1902108	regulation of mitochondrial membrane permeability involved in apoptotic process	-4.2834	-2.49843	6/42	25176,25400,83531,84027,85333,295922	Slc25a5,Camk2a,Vdac2,Gsk3b,Slc25a4,Mtch2
8_Member	GO Biological Processes	GO:0090559	regulation of membrane permeability	-3.73982	-2.0541	7/74	24468,25176,25400,83531,84027,85333,295922	Hspa8,Slc25a5,Camk2a,Vdac2,Gsk3b,Slc25a4,Mtch2
8_Member	GO Biological Processes	GO:0046902	regulation of mitochondrial membrane permeability	-3.48913	-1.84143	6/58	25176,25400,83531,84027,85333,295922	Slc25a5,Camk2a,Vdac2,Gsk3b,Slc25a4,Mtch2
9_Summary	GO Biological Processes	GO:0099072	regulation of postsynaptic membrane neurotransmitter receptor levels	-10.6088	-7.89855	15/94	24923,25012,25400,29177,29495,29704,29753,58948,64053,84027,116563,140670,171026,252892,266777,56064,58945,114612,117280,25152	Stx1b,Snap25,Camk2a,Hpca,Dlg4,Pacsin1,Ywhae,Dlg3,Dlg2,Gsk3b,Ap2m1,Ap2b1,Akap5,Lgi1,Nptx1,Nptn,Dynll1,Ddx39b,Hnrnpu,Map1a
9_Member	GO Biological Processes	GO:0099072	regulation of postsynaptic membrane neurotransmitter receptor levels	-10.6088	-7.89855	15/94	24923,25012,25400,29177,29495,29704,29753,58948,64053,84027,116563,140670,171026,252892,266777	Stx1b,Snap25,Camk2a,Hpca,Dlg4,Pacsin1,Ywhae,Dlg3,Dlg2,Gsk3b,Ap2m1,Ap2b1,Akap5,Lgi1,Nptx1
9_Member	GO Biological Processes	GO:0031503	protein-containing complex localization	-6.77717	-4.60901	18/255	24923,25012,25400,29177,29495,29704,56064,58945,58948,64053,84027,114612,116563,117280,140670,171026,252892,266777	Stx1b,Snap25,Camk2a,Hpca,Dlg4,Pacsin1,Nptn,Dynll1,Dlg3,Dlg2,Gsk3b,Ddx39b,Ap2m1,Hnrnpu,Ap2b1,Akap5,Lgi1,Nptx1
9_Member	GO Biological Processes	GO:0097120	receptor localization to synapse	-6.49834	-4.35366	10/75	24923,25012,25400,29495,56064,58948,64053,84027,252892,266777	Stx1b,Snap25,Camk2a,Dlg4,Nptn,Dlg3,Dlg2,Gsk3b,Lgi1,Nptx1
9_Member	GO Biological Processes	GO:1903539	protein localization to postsynaptic membrane	-5.6004	-3.60833	8/55	24923,25012,25400,29495,64053,84027,252892,266777	Stx1b,Snap25,Camk2a,Dlg4,Dlg2,Gsk3b,Lgi1,Nptx1
9_Member	GO Biological Processes	GO:0062237	protein localization to postsynapse	-5.53948	-3.558	8/56	24923,25012,25400,29495,64053,84027,252892,266777	Stx1b,Snap25,Camk2a,Dlg4,Dlg2,Gsk3b,Lgi1,Nptx1
9_Member	GO Biological Processes	GO:0099633	protein localization to postsynaptic specialization membrane	-5.15949	-3.25276	6/30	25400,29495,64053,84027,252892,266777	Camk2a,Dlg4,Dlg2,Gsk3b,Lgi1,Nptx1
9_Member	GO Biological Processes	GO:0099645	neurotransmitter receptor localization to postsynaptic specialization membrane	-5.15949	-3.25276	6/30	25400,29495,64053,84027,252892,266777	Camk2a,Dlg4,Dlg2,Gsk3b,Lgi1,Nptx1
9_Member	GO Biological Processes	GO:0035418	protein localization to synapse	-5.0574	-3.16331	9/85	24923,25012,25152,25400,29495,64053,84027,252892,266777	Stx1b,Snap25,Map1a,Camk2a,Dlg4,Dlg2,Gsk3b,Lgi1,Nptx1
9_Member	GO Biological Processes	GO:1902414	protein localization to cell junction	-3.9204	-2.21435	9/118	24923,25012,25152,25400,29495,64053,84027,252892,266777	Stx1b,Snap25,Map1a,Camk2a,Dlg4,Dlg2,Gsk3b,Lgi1,Nptx1
10_Summary	GO Biological Processes	GO:0036465	synaptic vesicle recycling	-10.1304	-7.55207	14/85	24242,24468,24804,24923,25716,29704,89816,116561,116563,116638,116743,117028,140670,140694,24674,25012,25416,29177,29364,29495,60465,65046,79434,83527,83800,117277,171026,191575,312694,317396,363875,499903	Calm1,Hspa8,Syp,Stx1b,Syt1,Pacsin1,Picalm,Cltb,Ap2m1,Slc17a7,Sh3gl2,Bin1,Ap2b1,Dnm1,Ppp3ca,Snap25,Dpysl2,Hpca,Cd47,Dlg4,Cttn,Ap2s1,Rab11b,Dbnl,Clta,Epn1,Akap5,Nme1,Necap1,Ubqln2,Rac1,Napb
10_Member	GO Biological Processes	GO:0036465	synaptic vesicle recycling	-10.1304	-7.55207	14/85	24242,24468,24804,24923,25716,29704,89816,116561,116563,116638,116743,117028,140670,140694	Calm1,Hspa8,Syp,Stx1b,Syt1,Pacsin1,Picalm,Cltb,Ap2m1,Slc17a7,Sh3gl2,Bin1,Ap2b1,Dnm1
10_Member	GO Biological Processes	GO:0048488	synaptic vesicle endocytosis	-9.81252	-7.29217	13/74	24242,24468,24804,25716,29704,89816,116561,116563,116638,116743,117028,140670,140694	Calm1,Hspa8,Syp,Syt1,Pacsin1,Picalm,Cltb,Ap2m1,Slc17a7,Sh3gl2,Bin1,Ap2b1,Dnm1
10_Member	GO Biological Processes	GO:0140238	presynaptic endocytosis	-9.81252	-7.29217	13/74	24242,24468,24804,25716,29704,89816,116561,116563,116638,116743,117028,140670,140694	Calm1,Hspa8,Syp,Syt1,Pacsin1,Picalm,Cltb,Ap2m1,Slc17a7,Sh3gl2,Bin1,Ap2b1,Dnm1
10_Member	GO Biological Processes	GO:0006897	endocytosis	-9.23239	-6.77899	32/564	24242,24468,24674,24804,24923,25012,25416,25716,29177,29364,29495,29704,60465,65046,79434,83527,83800,89816,116561,116563,116638,116743,117028,117277,140670,140694,171026,191575,312694,317396,363875,499903	Calm1,Hspa8,Ppp3ca,Syp,Stx1b,Snap25,Dpysl2,Syt1,Hpca,Cd47,Dlg4,Pacsin1,Cttn,Ap2s1,Rab11b,Dbnl,Clta,Picalm,Cltb,Ap2m1,Slc17a7,Sh3gl2,Bin1,Epn1,Ap2b1,Dnm1,Akap5,Nme1,Necap1,Ubqln2,Rac1,Napb
10_Member	GO Biological Processes	GO:0072583	clathrin-dependent endocytosis	-6.29207	-4.17684	8/45	65046,83800,89816,116561,116563,116743,140670,317396	Ap2s1,Clta,Picalm,Cltb,Ap2m1,Sh3gl2,Ap2b1,Ubqln2
10_Member	GO Biological Processes	GO:0006898	receptor-mediated endocytosis	-6.0833	-3.99565	17/255	25012,29177,29495,29704,60465,65046,83527,83800,89816,116561,116563,116743,140670,140694,171026,317396,499903	Snap25,Hpca,Dlg4,Pacsin1,Cttn,Ap2s1,Dbnl,Clta,Picalm,Cltb,Ap2m1,Sh3gl2,Ap2b1,Dnm1,Akap5,Ubqln2,Napb
10_Member	GO Biological Processes	GO:0030100	regulation of endocytosis	-5.80573	-3.7613	16/238	24242,24674,24923,29177,29495,29704,89816,116563,116638,116743,117028,140670,140694,171026,317396,499903	Calm1,Ppp3ca,Stx1b,Hpca,Dlg4,Pacsin1,Picalm,Ap2m1,Slc17a7,Sh3gl2,Bin1,Ap2b1,Dnm1,Akap5,Ubqln2,Napb
10_Member	GO Biological Processes	GO:0031623	receptor internalization	-5.66847	-3.65281	12/137	25012,29177,29495,29704,89816,116563,116743,140670,140694,171026,317396,499903	Snap25,Hpca,Dlg4,Pacsin1,Picalm,Ap2m1,Sh3gl2,Ap2b1,Dnm1,Akap5,Ubqln2,Napb
10_Member	GO Biological Processes	GO:1903421	regulation of synaptic vesicle recycling	-4.82781	-2.95866	6/34	24242,24923,89816,116563,116638,140694	Calm1,Stx1b,Picalm,Ap2m1,Slc17a7,Dnm1
10_Member	GO Biological Processes	GO:0043112	receptor metabolic process	-4.73624	-2.87509	13/197	25012,29177,29495,29704,79434,89816,116563,116743,140670,140694,171026,317396,499903	Snap25,Hpca,Dlg4,Pacsin1,Rab11b,Picalm,Ap2m1,Sh3gl2,Ap2b1,Dnm1,Akap5,Ubqln2,Napb
10_Member	GO Biological Processes	GO:0099590	neurotransmitter receptor internalization	-4.60764	-2.76967	6/37	25012,29177,29704,116563,140670,171026	Snap25,Hpca,Pacsin1,Ap2m1,Ap2b1,Akap5
10_Member	GO Biological Processes	GO:0002090	regulation of receptor internalization	-4.45408	-2.63451	8/78	29177,29495,29704,116563,116743,171026,317396,499903	Hpca,Dlg4,Pacsin1,Ap2m1,Sh3gl2,Akap5,Ubqln2,Napb
10_Member	GO Biological Processes	GO:1900242	regulation of synaptic vesicle endocytosis	-4.2918	-2.50183	5/26	24242,89816,116563,116638,140694	Calm1,Picalm,Ap2m1,Slc17a7,Dnm1
10_Member	GO Biological Processes	GO:0098884	postsynaptic neurotransmitter receptor internalization	-3.97884	-2.25438	5/30	29177,29704,116563,140670,171026	Hpca,Pacsin1,Ap2m1,Ap2b1,Akap5
10_Member	GO Biological Processes	GO:0140239	postsynaptic endocytosis	-3.97884	-2.25438	5/30	29177,29704,116563,140670,171026	Hpca,Pacsin1,Ap2m1,Ap2b1,Akap5
11_Summary	GO Biological Processes	GO:0043254	regulation of protein-containing complex assembly	-9.58585	-7.10026	29/454	24171,24851,24923,25558,25595,25617,29271,29431,60465,64303,81022,81732,83427,83527,83531,84027,117028,117273,117277,140654,140673,297518,298848,305614,361651,363875,493810,499903,683788,24245,24818,25176,25716,29364,29374,29489,29542,58945,60324,79256,81757,83529,85333,171116,288305,727679,24242,24468,25152,29693,83572,114562,114766,116743,171026,316539,362245,117280,360678,361069,25017,29275,29…	Add2,Tpm1,Stx1b,Stxbp1,Map2,Hspa5,Cfl1,Pak1,Cttn,Pfn1,Stxbp5,Actr3,Rack1,Dbnl,Vdac2,Gsk3b,Bin1,Rhoa,Epn1,Rps3,Napa,Arpc4,Mapre3,Sptbn1,Prrt2,Rac1,Capza2,Napb,Fscn1,Camk2b,Tcp1,Slc25a5,Syt1,Cd47,Cct4,Dync1h1,Pebp1,Dynll1,Synpo,Hnrnpd,Rala,Vdac1,Slc25a4,Opa1,Cct8,Pdxp,Calm1,Hspa8,Map1a,Atp2a2,Pafah1b1,Cdc37,Phb2,Sh3gl2,Akap5,Epha4,Map1lc3a,Hnrnpu,Arhgdia,Dmtn,Myo5a,Actc1,Pacsin1,Slc9a3r1,Calr,Itpka…
11_Member	GO Biological Processes	GO:0043254	regulation of protein-containing complex assembly	-9.58585	-7.10026	29/454	24171,24851,24923,25558,25595,25617,29271,29431,60465,64303,81022,81732,83427,83527,83531,84027,117028,117273,117277,140654,140673,297518,298848,305614,361651,363875,493810,499903,683788	Add2,Tpm1,Stx1b,Stxbp1,Map2,Hspa5,Cfl1,Pak1,Cttn,Pfn1,Stxbp5,Actr3,Rack1,Dbnl,Vdac2,Gsk3b,Bin1,Rhoa,Epn1,Rps3,Napa,Arpc4,Mapre3,Sptbn1,Prrt2,Rac1,Capza2,Napb,Fscn1
11_Member	GO Biological Processes	GO:0010638	positive regulation of organelle organization	-9.37567	-6.89835	31/525	24245,24818,24851,25176,25716,29271,29364,29374,29431,29489,29542,58945,60324,60465,64303,79256,81732,81757,83529,84027,85333,117028,117273,140654,171116,288305,297518,361651,363875,683788,727679	Camk2b,Tcp1,Tpm1,Slc25a5,Syt1,Cfl1,Cd47,Cct4,Pak1,Dync1h1,Pebp1,Dynll1,Synpo,Cttn,Pfn1,Hnrnpd,Actr3,Rala,Vdac1,Gsk3b,Slc25a4,Bin1,Rhoa,Rps3,Opa1,Cct8,Arpc4,Prrt2,Rac1,Fscn1,Pdxp
11_Member	GO Biological Processes	GO:0022411	cellular component disassembly	-8.48328	-6.13295	26/414	24171,24242,24468,24851,25152,25176,25595,29271,29693,60465,83527,83529,83572,85333,114562,114766,116743,140673,171026,305614,316539,362245,493810,499903,683788,727679	Add2,Calm1,Hspa8,Tpm1,Map1a,Slc25a5,Map2,Cfl1,Atp2a2,Cttn,Dbnl,Vdac1,Pafah1b1,Slc25a4,Cdc37,Phb2,Sh3gl2,Napa,Akap5,Sptbn1,Epha4,Map1lc3a,Capza2,Napb,Fscn1,Pdxp
11_Member	GO Biological Processes	GO:0032271	regulation of protein polymerization	-7.28599	-5.06213	18/236	24171,24851,25595,29271,29431,60465,64303,81732,83527,83531,117028,117273,140654,297518,298848,305614,363875,493810	Add2,Tpm1,Map2,Cfl1,Pak1,Cttn,Pfn1,Actr3,Dbnl,Vdac2,Bin1,Rhoa,Rps3,Arpc4,Mapre3,Sptbn1,Rac1,Capza2
11_Member	GO Biological Processes	GO:0051493	regulation of cytoskeleton organization	-7.19007	-4.98412	28/546	24171,24851,25152,25595,29271,29364,29431,29489,60324,60465,64303,81732,83527,83572,84027,117028,117273,117280,140654,297518,298848,305614,360678,361069,363875,493810,683788,727679	Add2,Tpm1,Map1a,Map2,Cfl1,Cd47,Pak1,Dync1h1,Synpo,Cttn,Pfn1,Actr3,Dbnl,Pafah1b1,Gsk3b,Bin1,Rhoa,Hnrnpu,Rps3,Arpc4,Mapre3,Sptbn1,Arhgdia,Dmtn,Rac1,Capza2,Fscn1,Pdxp
11_Member	GO Biological Processes	GO:0043624	cellular protein complex disassembly	-6.89747	-4.71291	14/149	24171,24468,24851,25152,25595,29271,83527,116743,140673,171026,305614,493810,499903,727679	Add2,Hspa8,Tpm1,Map1a,Map2,Cfl1,Dbnl,Sh3gl2,Napa,Akap5,Sptbn1,Capza2,Napb,Pdxp
11_Member	GO Biological Processes	GO:0032984	protein-containing complex disassembly	-6.79745	-4.62525	17/227	24171,24242,24468,24851,25152,25595,29271,29693,83527,116743,140673,171026,305614,362245,493810,499903,727679	Add2,Calm1,Hspa8,Tpm1,Map1a,Map2,Cfl1,Atp2a2,Dbnl,Sh3gl2,Napa,Akap5,Sptbn1,Map1lc3a,Capza2,Napb,Pdxp
11_Member	GO Biological Processes	GO:1902903	regulation of supramolecular fiber organization	-6.38787	-4.25447	22/393	24171,24468,24851,25152,25595,29271,29364,29431,60324,60465,64303,81732,83527,117028,117273,140654,297518,298848,305614,363875,493810,727679	Add2,Hspa8,Tpm1,Map1a,Map2,Cfl1,Cd47,Pak1,Synpo,Cttn,Pfn1,Actr3,Dbnl,Bin1,Rhoa,Rps3,Arpc4,Mapre3,Sptbn1,Rac1,Capza2,Pdxp
11_Member	GO Biological Processes	GO:0030036	actin cytoskeleton organization	-6.18501	-4.08722	31/723	24171,24245,24851,25017,29271,29275,29364,29431,29704,59114,60324,60465,64202,64303,81677,81732,81757,83527,83572,116653,117028,117273,297518,305614,309557,360678,361069,363875,493810,683788,727679	Add2,Camk2b,Tpm1,Myo5a,Cfl1,Actc1,Cd47,Pak1,Pacsin1,Slc9a3r1,Synpo,Cttn,Calr,Pfn1,Itpka,Actr3,Rala,Dbnl,Pafah1b1,Cap2,Bin1,Rhoa,Arpc4,Sptbn1,Epb41l2,Arhgdia,Dmtn,Rac1,Capza2,Fscn1,Pdxp
11_Member	GO Biological Processes	GO:0031333	negative regulation of protein-containing complex assembly	-6.00817	-3.93043	13/151	24171,24851,25558,25595,25617,29271,64303,83527,83531,84027,305614,361651,493810	Add2,Tpm1,Stxbp1,Map2,Hspa5,Cfl1,Pfn1,Dbnl,Vdac2,Gsk3b,Sptbn1,Prrt2,Capza2
11_Member	GO Biological Processes	GO:0032970	regulation of actin filament-based process	-5.93884	-3.86784	22/418	24171,24211,24851,29271,29364,29431,29693,60324,60465,64303,81732,83527,117028,117273,297518,305614,360678,361069,363875,493810,683788,727679	Add2,Atp1a1,Tpm1,Cfl1,Cd47,Pak1,Atp2a2,Synpo,Cttn,Pfn1,Actr3,Dbnl,Bin1,Rhoa,Arpc4,Sptbn1,Arhgdia,Dmtn,Rac1,Capza2,Fscn1,Pdxp
11_Member	GO Biological Processes	GO:0051258	protein polymerization	-5.80875	-3.7613	18/297	24171,24851,25595,29271,29431,60465,64303,81732,83527,83531,117028,117273,140654,297518,298848,305614,363875,493810	Add2,Tpm1,Map2,Cfl1,Pak1,Cttn,Pfn1,Actr3,Dbnl,Vdac2,Bin1,Rhoa,Rps3,Arpc4,Mapre3,Sptbn1,Rac1,Capza2
11_Member	GO Biological Processes	GO:0032956	regulation of actin cytoskeleton organization	-5.62197	-3.61961	20/370	24171,24851,29271,29364,29431,60324,60465,64303,81732,83527,117028,117273,297518,305614,360678,361069,363875,493810,683788,727679	Add2,Tpm1,Cfl1,Cd47,Pak1,Synpo,Cttn,Pfn1,Actr3,Dbnl,Bin1,Rhoa,Arpc4,Sptbn1,Arhgdia,Dmtn,Rac1,Capza2,Fscn1,Pdxp
11_Member	GO Biological Processes	GO:0008064	regulation of actin polymerization or depolymerization	-5.61351	-3.61875	14/190	24171,24851,29271,60465,64303,81732,83527,117028,117273,297518,305614,363875,493810,727679	Add2,Tpm1,Cfl1,Cttn,Pfn1,Actr3,Dbnl,Bin1,Rhoa,Arpc4,Sptbn1,Rac1,Capza2,Pdxp
11_Member	GO Biological Processes	GO:0030832	regulation of actin filament length	-5.55998	-3.57323	14/192	24171,24851,29271,60465,64303,81732,83527,117028,117273,297518,305614,363875,493810,727679	Add2,Tpm1,Cfl1,Cttn,Pfn1,Actr3,Dbnl,Bin1,Rhoa,Arpc4,Sptbn1,Rac1,Capza2,Pdxp
11_Member	GO Biological Processes	GO:0110053	regulation of actin filament organization	-5.54797	-3.56387	17/279	24171,24851,29271,29364,29431,60324,60465,64303,81732,83527,117028,117273,297518,305614,363875,493810,727679	Add2,Tpm1,Cfl1,Cd47,Pak1,Synpo,Cttn,Pfn1,Actr3,Dbnl,Bin1,Rhoa,Arpc4,Sptbn1,Rac1,Capza2,Pdxp
11_Member	GO Biological Processes	GO:0007015	actin filament organization	-5.41617	-3.45722	22/450	24171,24851,25017,29271,29275,29364,29431,29704,60324,60465,64303,81732,83527,117028,117273,297518,305614,361069,363875,493810,683788,727679	Add2,Tpm1,Myo5a,Cfl1,Actc1,Cd47,Pak1,Pacsin1,Synpo,Cttn,Pfn1,Actr3,Dbnl,Bin1,Rhoa,Arpc4,Sptbn1,Dmtn,Rac1,Capza2,Fscn1,Pdxp
11_Member	GO Biological Processes	GO:0030833	regulation of actin filament polymerization	-5.37407	-3.4229	13/172	24171,24851,29271,60465,64303,81732,83527,117028,117273,297518,305614,363875,493810	Add2,Tpm1,Cfl1,Cttn,Pfn1,Actr3,Dbnl,Bin1,Rhoa,Arpc4,Sptbn1,Rac1,Capza2
11_Member	GO Biological Processes	GO:0097435	supramolecular fiber organization	-5.33158	-3.38767	30/755	24171,24468,24851,25017,25152,25595,29271,29275,29364,29431,29489,29704,60324,60465,64303,81732,83527,83572,117028,117273,140654,297518,298848,301252,305614,361069,363875,493810,683788,727679	Add2,Hspa8,Tpm1,Myo5a,Map1a,Map2,Cfl1,Actc1,Cd47,Pak1,Dync1h1,Pacsin1,Synpo,Cttn,Pfn1,Actr3,Dbnl,Pafah1b1,Bin1,Rhoa,Rps3,Arpc4,Mapre3,Hsp90ab1,Sptbn1,Dmtn,Rac1,Capza2,Fscn1,Pdxp
11_Member	GO Biological Processes	GO:0051495	positive regulation of cytoskeleton organization	-5.27066	-3.33625	15/232	24851,29271,29364,29431,29489,60324,60465,64303,81732,117028,117273,140654,297518,363875,727679	Tpm1,Cfl1,Cd47,Pak1,Dync1h1,Synpo,Cttn,Pfn1,Actr3,Bin1,Rhoa,Rps3,Arpc4,Rac1,Pdxp
11_Member	GO Biological Processes	GO:0051017	actin filament bundle assembly	-5.23737	-3.31453	13/177	24171,24851,29271,29364,29431,60324,64303,83527,117273,361069,363875,683788,727679	Add2,Tpm1,Cfl1,Cd47,Pak1,Synpo,Pfn1,Dbnl,Rhoa,Dmtn,Rac1,Fscn1,Pdxp
11_Member	GO Biological Processes	GO:0051261	protein depolymerization	-5.1629	-3.25276	11/128	24171,24468,24851,25152,25595,29271,83527,116743,305614,493810,727679	Add2,Hspa8,Tpm1,Map1a,Map2,Cfl1,Dbnl,Sh3gl2,Sptbn1,Capza2,Pdxp
11_Member	GO Biological Processes	GO:0061572	actin filament bundle organization	-5.15768	-3.25276	13/180	24171,24851,29271,29364,29431,60324,64303,83527,117273,361069,363875,683788,727679	Add2,Tpm1,Cfl1,Cd47,Pak1,Synpo,Pfn1,Dbnl,Rhoa,Dmtn,Rac1,Fscn1,Pdxp
11_Member	GO Biological Processes	GO:0032272	negative regulation of protein polymerization	-5.14309	-3.24036	9/83	24171,24851,25595,29271,64303,83527,83531,305614,493810	Add2,Tpm1,Map2,Cfl1,Pfn1,Dbnl,Vdac2,Sptbn1,Capza2
11_Member	GO Biological Processes	GO:1902905	positive regulation of supramolecular fiber organization	-5.03784	-3.148	14/213	24851,29271,29364,29431,60324,60465,64303,81732,117028,117273,140654,297518,363875,727679	Tpm1,Cfl1,Cd47,Pak1,Synpo,Cttn,Pfn1,Actr3,Bin1,Rhoa,Rps3,Arpc4,Rac1,Pdxp
11_Member	GO Biological Processes	GO:0030041	actin filament polymerization	-4.90387	-3.02129	13/190	24171,24851,29271,60465,64303,81732,83527,117028,117273,297518,305614,363875,493810	Add2,Tpm1,Cfl1,Cttn,Pfn1,Actr3,Dbnl,Bin1,Rhoa,Arpc4,Sptbn1,Rac1,Capza2
11_Member	GO Biological Processes	GO:0008154	actin polymerization or depolymerization	-4.90081	-3.02129	14/219	24171,24851,29271,60465,64303,81732,83527,117028,117273,297518,305614,363875,493810,727679	Add2,Tpm1,Cfl1,Cttn,Pfn1,Actr3,Dbnl,Bin1,Rhoa,Arpc4,Sptbn1,Rac1,Capza2,Pdxp
11_Member	GO Biological Processes	GO:1901879	regulation of protein depolymerization	-4.62591	-2.78605	9/96	24171,24851,25152,25595,29271,83527,305614,493810,727679	Add2,Tpm1,Map1a,Map2,Cfl1,Dbnl,Sptbn1,Capza2,Pdxp
11_Member	GO Biological Processes	GO:0030834	regulation of actin filament depolymerization	-4.47209	-2.6489	7/57	24171,24851,29271,83527,305614,493810,727679	Add2,Tpm1,Cfl1,Dbnl,Sptbn1,Capza2,Pdxp
11_Member	GO Biological Processes	GO:1901880	negative regulation of protein depolymerization	-4.33479	-2.53974	8/81	24171,24851,25152,25595,29271,83527,305614,493810	Add2,Tpm1,Map1a,Map2,Cfl1,Dbnl,Sptbn1,Capza2
11_Member	GO Biological Processes	GO:0051693	actin filament capping	-4.2834	-2.49843	6/42	24171,24851,29271,83527,305614,493810	Add2,Tpm1,Cfl1,Dbnl,Sptbn1,Capza2
11_Member	GO Biological Processes	GO:0030042	actin filament depolymerization	-4.23219	-2.45548	7/62	24171,24851,29271,83527,305614,493810,727679	Add2,Tpm1,Cfl1,Dbnl,Sptbn1,Capza2,Pdxp
11_Member	GO Biological Processes	GO:0030837	negative regulation of actin filament polymerization	-4.01424	-2.28247	7/67	24171,24851,29271,64303,83527,305614,493810	Add2,Tpm1,Cfl1,Pfn1,Dbnl,Sptbn1,Capza2
11_Member	GO Biological Processes	GO:0043242	negative regulation of protein-containing complex disassembly	-3.97274	-2.25116	8/91	24171,24851,25152,25595,29271,83527,305614,493810	Add2,Tpm1,Map1a,Map2,Cfl1,Dbnl,Sptbn1,Capza2
11_Member	GO Biological Processes	GO:0044089	positive regulation of cellular component biogenesis	-3.95735	-2.2372	22/561	24851,29271,29364,29431,29448,29489,58945,60324,60465,64303,81732,81757,83427,84027,117028,117273,117277,140654,297518,306439,363875,683788	Tpm1,Cfl1,Cd47,Pak1,Rab7a,Dync1h1,Dynll1,Synpo,Cttn,Pfn1,Actr3,Rala,Rack1,Gsk3b,Bin1,Rhoa,Epn1,Rps3,Arpc4,Gpm6a,Rac1,Fscn1
11_Member	GO Biological Processes	GO:0030835	negative regulation of actin filament depolymerization	-3.94928	-2.23483	6/48	24171,24851,29271,83527,305614,493810	Add2,Tpm1,Cfl1,Dbnl,Sptbn1,Capza2
11_Member	GO Biological Processes	GO:0031334	positive regulation of protein-containing complex assembly	-3.71427	-2.03258	13/248	29431,60465,64303,81732,83427,84027,117028,117273,117277,140654,297518,363875,683788	Pak1,Cttn,Pfn1,Actr3,Rack1,Gsk3b,Bin1,Rhoa,Epn1,Rps3,Arpc4,Rac1,Fscn1
11_Member	GO Biological Processes	GO:0043244	regulation of protein-containing complex disassembly	-3.62657	-1.96155	9/129	24171,24851,25152,25595,29271,83527,305614,493810,727679	Add2,Tpm1,Map1a,Map2,Cfl1,Dbnl,Sptbn1,Capza2,Pdxp
11_Member	GO Biological Processes	GO:0032273	positive regulation of protein polymerization	-3.45571	-1.81042	9/136	29431,60465,64303,81732,117028,117273,140654,297518,363875	Pak1,Cttn,Pfn1,Actr3,Bin1,Rhoa,Rps3,Arpc4,Rac1
11_Member	GO Biological Processes	GO:0032231	regulation of actin filament bundle assembly	-3.32455	-1.70955	8/113	24851,29271,29364,29431,60324,64303,117273,363875	Tpm1,Cfl1,Cd47,Pak1,Synpo,Pfn1,Rhoa,Rac1
11_Member	GO Biological Processes	GO:1902904	negative regulation of supramolecular fiber organization	-3.26945	-1.66004	10/175	24171,24468,24851,25152,25595,29271,64303,83527,305614,493810	Add2,Hspa8,Tpm1,Map1a,Map2,Cfl1,Pfn1,Dbnl,Sptbn1,Capza2
11_Member	GO Biological Processes	GO:0010639	negative regulation of organelle organization	-3.12927	-1.54194	15/360	24171,24851,25152,25176,25558,25595,29271,60374,64303,83527,117280,171116,305614,361651,493810	Add2,Tpm1,Map1a,Slc25a5,Stxbp1,Map2,Cfl1,Lmna,Pfn1,Dbnl,Hnrnpu,Opa1,Sptbn1,Prrt2,Capza2
12_Summary	GO Biological Processes	GO:0044282	small molecule catabolic process	-9.21033	-6.33096	21/347	24333,24334,24401,25721,29539,60416,63864,64157,64192,64473,65152,78959,79131,171155,290029,290401,299201,361215,681913,690163,727679,24380,29592,29600,94173,361596,24957,25104,298596,29483,58835	Eno1,Eno2,Got1,Got2,Aldh2,Pfkp,Hsd17b10,Ddah1,Qdpr,Bpnt1,Pfkm,Akr1a1,Fabp3,Hadhb,Pnp,Esd,Dlst,Auh,Gstz1,Oxct1,Pdxp,Gad2,Bcat1,Atp2b4,Idh3b,Idh2,Glul,Pc,Sdhb,Slc1a3,Phgdh
12_Member	GO Biological Processes	GO:0044282	small molecule catabolic process	-9.21033	-6.33096	21/347	24333,24334,24401,25721,29539,60416,63864,64157,64192,64473,65152,78959,79131,171155,290029,290401,299201,361215,681913,690163,727679	Eno1,Eno2,Got1,Got2,Aldh2,Pfkp,Hsd17b10,Ddah1,Qdpr,Bpnt1,Pfkm,Akr1a1,Fabp3,Hadhb,Pnp,Esd,Dlst,Auh,Gstz1,Oxct1,Pdxp
12_Member	GO Biological Processes	GO:0009063	cellular amino acid catabolic process	-6.27034	-4.16217	11/99	24380,24401,25721,29592,29600,63864,64157,64192,299201,361215,681913	Gad2,Got1,Got2,Bcat1,Atp2b4,Hsd17b10,Ddah1,Qdpr,Dlst,Auh,Gstz1
12_Member	GO Biological Processes	GO:1901606	alpha-amino acid catabolic process	-5.41577	-3.45722	9/77	24380,24401,25721,29600,63864,64157,64192,299201,681913	Gad2,Got1,Got2,Atp2b4,Hsd17b10,Ddah1,Qdpr,Dlst,Gstz1
12_Member	GO Biological Processes	GO:0006103	2-oxoglutarate metabolic process	-5.26696	-3.33509	5/17	24401,25721,94173,299201,361596	Got1,Got2,Idh3b,Dlst,Idh2
12_Member	GO Biological Processes	GO:0046395	carboxylic acid catabolic process	-4.74705	-2.88392	14/226	24380,24401,25721,29592,29600,63864,64157,64192,78959,79131,171155,299201,361215,681913	Gad2,Got1,Got2,Bcat1,Atp2b4,Hsd17b10,Ddah1,Qdpr,Akr1a1,Fabp3,Hadhb,Dlst,Auh,Gstz1
12_Member	GO Biological Processes	GO:0016054	organic acid catabolic process	-4.70427	-2.84707	14/228	24380,24401,25721,29592,29600,63864,64157,64192,78959,79131,171155,299201,361215,681913	Gad2,Got1,Got2,Bcat1,Atp2b4,Hsd17b10,Ddah1,Qdpr,Akr1a1,Fabp3,Hadhb,Dlst,Auh,Gstz1
12_Member	GO Biological Processes	GO:0043648	dicarboxylic acid metabolic process	-4.62591	-2.78605	9/96	24380,24401,24957,25104,25721,94173,298596,299201,361596	Gad2,Got1,Glul,Pc,Got2,Idh3b,Sdhb,Dlst,Idh2
12_Member	GO Biological Processes	GO:0009065	glutamine family amino acid catabolic process	-4.37885	-2.57478	5/25	24380,24401,25721,29600,64157	Gad2,Got1,Got2,Atp2b4,Ddah1
12_Member	GO Biological Processes	GO:0006520	cellular amino acid metabolic process	-3.97646	-2.25344	14/266	24380,24401,24957,25721,29483,29592,29600,58835,63864,64157,64192,299201,361215,681913	Gad2,Got1,Glul,Got2,Slc1a3,Bcat1,Atp2b4,Phgdh,Hsd17b10,Ddah1,Qdpr,Dlst,Auh,Gstz1
12_Member	GO Biological Processes	GO:0008652	cellular amino acid biosynthetic process	-3.81493	-2.1212	7/72	24401,24957,25721,29483,29592,29600,58835	Got1,Glul,Got2,Slc1a3,Bcat1,Atp2b4,Phgdh
12_Member	GO Biological Processes	GO:0009064	glutamine family amino acid metabolic process	-3.77706	-2.08869	7/73	24380,24401,24957,25721,29600,58835,64157	Gad2,Got1,Glul,Got2,Atp2b4,Phgdh,Ddah1
12_Member	GO Biological Processes	GO:1901605	alpha-amino acid metabolic process	-3.69212	-2.01558	11/185	24380,24401,24957,25721,29600,58835,63864,64157,64192,299201,681913	Gad2,Got1,Glul,Got2,Atp2b4,Phgdh,Hsd17b10,Ddah1,Qdpr,Dlst,Gstz1
12_Member	GO Biological Processes	GO:0006107	oxaloacetate metabolic process	-3.63434	-2.0152	3/11	24401,25104,25721	Got1,Pc,Got2
12_Member	GO Biological Processes	GO:0009068	aspartate family amino acid catabolic process	-3.30181	-1.78327	3/14	24401,25721,299201	Got1,Got2,Dlst
12_Member	GO Biological Processes	GO:0009066	aspartate family amino acid metabolic process	-2.90662	-1.49462	4/41	24401,25721,58835,299201	Got1,Got2,Phgdh,Dlst
12_Member	GO Biological Processes	GO:0006536	glutamate metabolic process	-2.68713	-1.17307	4/34	24380,24401,24957,25721	Gad2,Got1,Glul,Got2
12_Member	GO Biological Processes	GO:1901607	alpha-amino acid biosynthetic process	-2.44274	-0.971932	5/64	24401,24957,25721,29600,58835	Got1,Glul,Got2,Atp2b4,Phgdh
13_Summary	GO Biological Processes	GO:0010770	positive regulation of cell morphogenesis involved in differentiation	-8.46297	-5.70853	8/105	24245,64202,83527,171026,171116,316539,361069,363875,29431,84027,89816,362587,25576,361596,24851,29704,60465,140654,58948	Camk2b,Calr,Dbnl,Akap5,Opa1,Epha4,Dmtn,Rac1,Pak1,Gsk3b,Picalm,Macf1,Ywhah,Idh2,Tpm1,Pacsin1,Cttn,Rps3,Dlg3
13_Member	GO Biological Processes	GO:0010770	positive regulation of cell morphogenesis involved in differentiation	-8.46297	-5.70853	8/105	24245,64202,83527,171026,171116,316539,361069,363875	Camk2b,Calr,Dbnl,Akap5,Opa1,Epha4,Dmtn,Rac1
13_Member	GO Biological Processes	GO:0010720	positive regulation of cell development	-8.07291	-5.37647	12/382	24245,29431,64202,83527,84027,89816,171026,171116,316539,361069,362587,363875	Camk2b,Pak1,Calr,Dbnl,Gsk3b,Picalm,Akap5,Opa1,Epha4,Dmtn,Macf1,Rac1
13_Member	GO Biological Processes	GO:0010769	regulation of cell morphogenesis involved in differentiation	-7.86187	-5.24007	8/125	24245,64202,83527,171026,171116,316539,361069,363875	Camk2b,Calr,Dbnl,Akap5,Opa1,Epha4,Dmtn,Rac1
13_Member	GO Biological Processes	GO:0060284	regulation of cell development	-7.64907	-5.06026	14/610	24245,25576,29431,64202,83527,84027,89816,171026,171116,316539,361069,361596,362587,363875	Camk2b,Ywhah,Pak1,Calr,Dbnl,Gsk3b,Picalm,Akap5,Opa1,Epha4,Dmtn,Idh2,Macf1,Rac1
13_Member	GO Biological Processes	GO:0022604	regulation of cell morphogenesis	-7.63122	-5.05288	11/334	24245,24851,64202,83527,89816,171026,171116,316539,361069,362587,363875	Camk2b,Tpm1,Calr,Dbnl,Picalm,Akap5,Opa1,Epha4,Dmtn,Macf1,Rac1
13_Member	GO Biological Processes	GO:0050773	regulation of dendrite development	-7.45118	-4.91717	8/141	24245,25576,29704,83527,84027,171026,171116,316539	Camk2b,Ywhah,Pacsin1,Dbnl,Gsk3b,Akap5,Opa1,Epha4
